# Supplementary material for: Global warming-adapted target forest types for Germany
Source: Research Square preprint supplement (doi:10.21203/rs.3.rs-7235884/v1), 2025-09-05
Supplement: Supplementary file 1 [file 551d200382a592d1f84bbaff.docx]

# Supplement S1: Fact sheets of the Target forest types

Explanations:

Water budget levels according to Benning et al. (2015):

| **Terrestrical sites** | | **Sites with backwater influence** | | **Sites with groundwater** | |
| --- | --- | --- | --- | --- | --- |
| T1 | Dry | S1 | Very weakly waterlogged/alternatingly wet and dry | G1 | Very deep |
| T2 | Moderately dry | S2 | Weakly waterlogged/alternatingly wet and dry | G2 | Very deep |
| T3 | Moderately fresh | S3 | Moderately waterlogged/alternatingly wet and dry | G3 | Deep |
| T4 | Fresh | S4 | Heavily waterlogged/alternatingly wet and dry | G4 | Medium |
| T5 | Very fresh | S5 | Very heavily waterlogged/alternatingly wet | G5 | Shallow |
|  |  | S6 | Extremely waterlogged | G6 | Very shallow |

Trophy levels according to Benning et al. (2015):

- e eutroph
- mo meso-eutroph
- mo mesotroph
- om oligo-mesotroph
- om oligotroph
- d dystroph

The color coding of the possible climate classes denotes:

- green = the target forest type is recommended as a priority for this climate class,
- yellow = target forest type is possible, but another forest community is recommended as a priority

The areal fraction indicates the proportion of the area covered by the species in horizontal projection in relation to the total area of the community´s reference relevée. The degree of cover always refers to the respective vegetation layer. The sum gives the total area of the layer.

Climate classes:

Table of contents:

[Aceri monspessulani-Quercetum petraeae OBERDORFER 1957 6](#_Toc190352467)

[Aceri tartarici-Quercetum pubescenti-roboris ZÓLYOMI 1957 6](#_Toc190352468)

[Adenostylo glabrae-Abietetum MAYER 1970 7](#_Toc190352469)

[Adenostylo glabrae-Piceetum MAYER 1970 8](#_Toc190352470)

[Adoxo moschatellinae-Aceretum pseudoplatani PASSARGE 1959 9](#_Toc190352471)

[Agrostio-Quercetum roboris deschampsietosum PASSARGE 1953 10](#_Toc190352472)

[Agrostio-Quercetum roboris festucetosum ovinaea PASSARGE 1953 10](#_Toc190352473)

[Alnetum incanae LÜDI 1921 11](#_Toc190352474)

[Alnetum viridis BRAUN-BLANQUET 1918 12](#_Toc190352475)

[Arbuto unedonis-Quercetum pyrenaicae RIVAS GODAY ex RIVAS-MARTINEZ 1987 13](#_Toc190352476)

[Arunco dioici-Aceretum pseudoplatani MOOR 1952 13](#_Toc190352477)

[Aspenrulo odorati-Fagetum sylvatici dryopteridetosum SCAMONI 1967 14](#_Toc190352478)

[Aspenrulo odorati-Fagetum sylvatici typicum MAYER 1964 15](#_Toc190352479)

[Aspenrulo-Abieti-Fagetum sylvatici typicum TH. MÜLLER 1964 16](#_Toc190352480)

[Asplenio onopteris-Quercetum cerridis UBALDI 1995 17](#_Toc190352481)

[Athyrio-Alnetum glutinosae TÜXEN 1943 17](#_Toc190352482)

[Bazzanio-Piceetum (SCHMIDT et GAISBERG 1936) BRAUN-BLANQUET 1939 18](#_Toc190352483)

[Betulo-Quercetum petraeae typicum (GAUME 1924) TÜXEN 1937 19](#_Toc190352484)

[Bromo-Carpinetum betuli dryopteridetosum HOFMANN 1968 20](#_Toc190352485)

[Bromo-Carpinetum betuli typicum HOFMANN 1968 21](#_Toc190352486)

[Buxo-Quercetum pubescentis BRAUN-BLANQUET 1932 22](#_Toc190352487)

[Calamagrostio variae-Piceetum SCHWEINGRUBER 1972 22](#_Toc190352488)

[Calamagrostio villosae-(Abieto-)Fagetum sylvatici MIKUSKA 1972 23](#_Toc190352489)

[Calamagrostio villosae-Piceetum typicum VOLK 1939 24](#_Toc190352490)

[Calamagrostio villosae-Piceetum lophozietosum TÜXEN 1937 25](#_Toc190352491)

[Calamagrostio villosae-Piceetum vaccinietosum vitis-idaea VOLK 1939 26](#_Toc190352492)

[Cardamino armarae-Alnetum glutinosae (MEIJER-DREES 1936) PASSARGE 1968 27](#_Toc190352493)

[Carici elongatae-Alnetum glutinosae SCHWICKERATH 1933 28](#_Toc190352494)

[Carici microcarpae-Alnetum glutinosae FOGGI et al. 2006 28](#_Toc190352495)

[Carici pallescentis-Alnetum glutinosae LANDI et ANGIOLINI 2010 29](#_Toc190352496)

[Carici pendulae-Aceretum pseudoplatani (ETTER 1947) OBERDORFER 1957 30](#_Toc190352497)

[Carici remotae-Fraxinetum excelsi W. KOCH 1926 ex FABER 1936 31](#_Toc190352498)

[Carici-Fagetum sylvatici typicum MOOR 1952 em. LOHMEYER 1953 31](#_Toc190352499)

[Carpino orientalis-Quercetum cerridis KLIKA 1938 32](#_Toc190352500)

[Castaneo-Fagetum sylvatici MARINCEK 1980 33](#_Toc190352501)

[Castaneo-Quercetum petraea HORVÁT 1963 34](#_Toc190352502)

[Cephalanthero rubrae-Quercetum fagineae RIVAS-MARTINEZ in RIVAS GODAY et al. 1959 35](#_Toc190352503)

[Cephalanthero-Fagetum sylvatici typicum HOFMANN 1956 35](#_Toc190352504)

[Circaeo-Alnetum glutinosae OBERDORFER 1953 36](#_Toc190352505)

[Cladonio-Pinetum sylvestris typicum PASSARGE 1956 37](#_Toc190352506)

[Corno-Quercetum (pubescentis-dalechampii) MATHÉ et KOVÁCS 1962 38](#_Toc190352507)

[Coronilla emeri-Quercetum pubescentis dictamnodetosum FÖRSTER 1968 39](#_Toc190352508)

[Coronilla emeri-Quercetum pubescentis typicum FÖRSTER 1968 39](#_Toc190352509)

[Corynephoro-Pinetum sylvestris (JURASZEK 1928) HOFMANN 1964 40](#_Toc190352510)

[Cotino coggygraria-Quercetum pubescentis coronilletosum coronataea SOÓ 1931 41](#_Toc190352511)

[Cotino coggygraria-Quercetum pubescentis seslerietosum variaea FUTÁK 1947 42](#_Toc190352512)

[Cytiso nigricantis-Quercetum roboris OBERDORFER 1957 43](#_Toc190352513)

[Daphno laureolae-Quercetum cerridis TAFFETANI et BIONDI 1995 44](#_Toc190352514)

[Dicrano-Fagetum sylvatici PASSARGE et HOFMANN 1965 45](#_Toc190352515)

[Endymio-Carpinetum betuli NOIRFALISE 1970 45](#_Toc190352516)

[Equiseto sylvatici-Abietetum albae MOOR 1952 46](#_Toc190352517)

[Erico carnae-Pinetum prostratae ZÖTTL 1951 47](#_Toc190352518)

[Erico carnae-Pinetum uncinatae BRAUN-BLANQUET et al. 1939 48](#_Toc190352519)

[Erico carneae-Rhododendretum hirsuti OBERDORFER 1967 48](#_Toc190352520)

[Erico scopariae-Pinetum pinastri BIONDI et VAGGE 2015 49](#_Toc190352521)

[Eriophoro-Betuletum pubescentis (HUECK 1925) PASSARGE et HOFMANN 1968 50](#_Toc190352522)

[Eriophoro-Pinetum sylvestris (HUECK 1925) PASSARGE et HOFMANN 1968 51](#_Toc190352523)

[Euphorbio angulatae-Quercetum pubescentis KNAPP ex HÜBL 1959 51](#_Toc190352524)

[Fraxino excelsi-Aceretum pseudoplatani TÜXEN 1937 52](#_Toc190352525)

[Fraxino excelsi-Populetum albae JURKO 1958 53](#_Toc190352526)

[Fraxino oxycarpae-Quercetum cerridis SCOLOPPA et FILESI 1998 54](#_Toc190352527)

[Galio-Carpinetum betuli potentilletosum albaea KLIKA 1939 54](#_Toc190352528)

[Galio-Carpinetum betuli typicum OBERDORFER 1957 55](#_Toc190352529)

[Geranio asphodeloidis–Quercetum frainetto BERGMEIER 2008 56](#_Toc190352530)

[Holco mollis-Quercetum (robori-petraeae) LEMÉE 1937 corr. et em. OBERDORFER 1992 57](#_Toc190352531)

[Huetio cynapioidis–Quercetum frainetto RAUS 1980 57](#_Toc190352532)

[Ilici-Fagetum sylvatici BRAUN-BLANQUET 1967 58](#_Toc190352533)

[Irido-Alnetum glutinosae DOING 1962 59](#_Toc190352534)

[Juglando-Platanetum orientalis EM et DEKOV 1961 60](#_Toc190352535)

[Junco-Fraxinetum parvifoliae KÁPÁTI 1962 60](#_Toc190352536)

[Juniperetum communis-thuriferae VAGGE et BIONDI 2008 61](#_Toc190352537)

[Larici-Pinetum cembrae LEANDRU 1954 62](#_Toc190352538)

[Lathyro laxiﬂori–Castanetum sativae BRULLO et al. 2004 63](#_Toc190352539)

[Lauro-Fraxinetum parvifoliae KÁPÁTI 1962 63](#_Toc190352540)

[Lavandulo cariensis-Pinetum pineae VAROL et Tel (2010) 64](#_Toc190352541)

[Leucobryo-Pinetum sylvestris molienetosum MATUSZKIEWICZ 1962 65](#_Toc190352542)

[Leucobryo-Pinetum sylvestris typicum MATUSZKIEWICZ 1962 66](#_Toc190352543)

[Lonicero alpiginae-Abieti-Fagetum sylvatici allietosum OBERDORFER 1957 67](#_Toc190352544)

[Luzulo luzuloides-Abietetum athyrietosum OBERDORFER 1957 67](#_Toc190352545)

[Luzulo luzuloides-Abietetum typicum OBERDORFER 1957 68](#_Toc190352546)

[Luzulo luzuloides-Fagetum sylvatici athyrietosum MEUSEL 1937 69](#_Toc190352547)

[Luzulo luzuloides-Fagetum sylvatici caricetosum brizoides MEUSEL 1937 70](#_Toc190352548)

[Luzulo luzuloides-Fagetum sylvatici convallarietosum MEUSEL 1937 71](#_Toc190352549)

[Luzulo luzuloides-Fagetum sylvatici typicum MEUSEL 1937 71](#_Toc190352550)

[Luzulo luzuloides-Piceetum (SCHMID et GAISBERG 1936) BRAUN-BLANQUET et SISSINGH 1939 72](#_Toc190352551)

[Maianthemo-Fagetum sylvatici calamagrostietosum PASSARGE 1959 73](#_Toc190352552)

[Maianthemo-Fagetum sylvatici dryopteridetosum PASSARGE 1959 74](#_Toc190352553)

[Maianthemo-Fagetum sylvatici typicum PASSARGE 1959 74](#_Toc190352554)

[Melico-Fagetum sylvatici dryopteridetosum (KNAPP 1942) HOFMANN et PASSARGE 1968 75](#_Toc190352555)

[Melico-Fagetum sylvatici typicum (KNAPP 1942) PASSARGE et HOFMANN 1968 76](#_Toc190352556)

[Mercuriali-Fagetum sylvatici convallarietosum (HARTMANN 1953) HOFMANN 1965 77](#_Toc190352557)

[Mercuriali-Fagetum sylvatici melicetosum (HARTMANN 1953) HOFMANN 1965 77](#_Toc190352558)

[Molinio-Fagetum sylvatici SCAMONI 1959 78](#_Toc190352559)

[Molinio-Quercetum roboris (TÜXEN 1937) SCAMONI et PASSARGE 1959 79](#_Toc190352560)

[Nerio-Platanetum orientalis KÁPÁTI 1962 80](#_Toc190352561)

[Oenantho crocatae-Alnetum glutinosae ARROGINI et al. 1996 80](#_Toc190352562)

[Oenantho pimpinelloidis–Quercetum frainetto BERGMEIER et DIMOPOULOS 2008 81](#_Toc190352563)

[Osmundo-Alnetum glutinosae VAN DEN BERGHEN 1971 82](#_Toc190352564)

[Ostryo-Pinetum nigrae TRINAJSTIC 1999 83](#_Toc190352565)

[Paeonio-Abietetum pinsapi ASENSI et RIVAS-MARTINEZ 1976 83](#_Toc190352566)

[Petasiti-Platanetum orientalis KÁPÁTI 1962 84](#_Toc190352567)

[Phillyreo latifoliae–Carpinetum orientalis BERGMEIER et DIMOPOULOS 2008 85](#_Toc190352568)

[Plagio-Ostryetum GRUBER 1968 86](#_Toc190352569)

[Pleurozio schreberi-Betuletum pubescentis HUECK 1925 em. PASSARGE 1968 86](#_Toc190352570)

[Pleurozio schreberi-Pinion sylvestris PASSARGE et HOFMANN 1968 87](#_Toc190352571)

[Polytricho-Carpinetum betuli SCAMONI 1959 88](#_Toc190352572)

[Populetum albae BRAUN-BLANQUET ex TCHOU 1949 89](#_Toc190352573)

[Potentillo albae-Quercetum LIBBERT 1933 90](#_Toc190352574)

[Primulo veris-Carpinetum betuli NEUHÄUSL et NEUHÄUSLOVA-NOVOTNA 1964 91](#_Toc190352575)

[Pruno padi-Fraxinetum excelsi OBERDORFER 1953 91](#_Toc190352576)

[Pulmonario longifoliae-Quercetum fagineae LOIDI et HERRERA 1990 92](#_Toc190352577)

[Quercetum dalechampii-cerris SOÓ 1963 93](#_Toc190352578)

[Quercetum frainetto-cerris moesiacum RUDSKI apud HORVAT 1946 94](#_Toc190352579)

[Querco cerridis-Betuletum pendulae BIONDI, BRIGIAPAGLIA et TEDESCINI-LALLI 1998 94](#_Toc190352580)

[Querco (roboris)-Carpinetum medioeuropaeum typicum TÜXEN 1937 95](#_Toc190352581)

[Querco (pubescentis)-Tilietum tomentosum STJEPANOVIC-VESELICIC 1953 96](#_Toc190352582)

[Querco (roboris)-Ulmetum minoris ISSLER 1953 97](#_Toc190352583)

[Rhamno almeriensis-Pinetum halepensis RIVAS-MARTINEZ 2011 98](#_Toc190352584)

[Rhododendro hirsuti-Pinetum prostratae ZÖTTL 1951 98](#_Toc190352585)

[Rhodothamno-Laricetum deciduae WILLNER et ZUKRIGL 1999 99](#_Toc190352586)

[Ribo sylvestris-Fraxinetum excelsi LEMÉE 1937 corr. PASSARGE 1958 100](#_Toc190352587)

[Salicetum albae ISSLER 1926 101](#_Toc190352588)

[Salicetum auritae JONAS 1935 101](#_Toc190352589)

[Salicetum purpureae WENDELBERGER-ZELINKA 1952 102](#_Toc190352590)

[Salicetum triandrae (MALCUIT 1929) NOIRFALISE 1955 103](#_Toc190352591)

[Sambuco (nigrae)-Quercetum roboris HOFMANN 1965 104](#_Toc190352592)

[Stachyo-Carpinetum betuli TÜXEN 1930 104](#_Toc190352593)

[Stellario holosteae-Carpinetum betuli HARTMANN 1959 105](#_Toc190352594)

[Stellario-Alnetum aruncodetosum TÜXEN 1957 106](#_Toc190352595)

[Stellario-Alnetum typicum LOHMEYER 1957 107](#_Toc190352596)

[Tilio cordatae-Carpinetum betuli TRACZYK 1962 107](#_Toc190352597)

[Vaccinio myrtilli-Fagetum sylvatici mnietosum PASSARGE 1965 108](#_Toc190352598)

[Vaccinio myrtilli-Fagetum sylvatici typicum PASSARGE 1965 109](#_Toc190352599)

[Vaccinio myrtilli-Piceetum TÜXEN 1955 110](#_Toc190352600)

[Vaccinio myrtilli-Pinetum sylvaticae PASSARGE 1956 110](#_Toc190352601)

[Vaccinio uliginosi-Betuletum pubescentis LIBBERT 1933 111](#_Toc190352602)

[Vaccinio uliginosi-Piceetum HARTMANN 1953 112](#_Toc190352603)

[Vaccinio uliginosi-Pinetum mugi KÄSTNER et FLÖSSNER 1933 113](#_Toc190352604)

[Vaccinio uliginosi-Pinetum sylvestris KLEIST 1929 em. MATUSZKIEWICZ 1962 114](#_Toc190352605)

[Vaccinio vitis-ideae-Quercetum (roboris) OBERDORFER 1957 115](#_Toc190352606)

[Vaccinio-Abietetum leucobryetosum OBERDORFER 1957 115](#_Toc190352607)

[Vaccinio-Abietetum oxalidetosum OBERDORFER 1957 116](#_Toc190352608)

[Vaccinio-Abietetum typicum OBERDORFER 1957 117](#_Toc190352609)

[Vaccinio-Rhododendretum ferruginei BRAUN-BLANQUET 1937 118](#_Toc190352610)

[Violo-Quercetum roboris deschampsietosum PASSARGE 1953 118](#_Toc190352611)

[Violo-Quercetum roboris festucetorum ovinae PASSARGE 1953 119](#_Toc190352612)

# **Aceri monspessulani-Quercetum petraeae OBERDORFER 1957**

| **Synonym** | | | | **1.** **Sources of the community relevées** | | | | | | | | | | | | | | | | | | | | | | **No. of relevées** | | | | |
| --- | --- | --- | --- | --- | --- | --- | --- | --- | --- | --- | --- | --- | --- | --- | --- | --- | --- | --- | --- | --- | --- | --- | --- | --- | --- | --- | --- | --- | --- | --- |
| **2. EUNIS-Code, mapped EUNIS class** | | | | | | | | | | | | | | | | | | | | | |
| Rock maple- Sessile oak forest | | | | 1. Oberdorfer (1992) Vol IV, Table 297/1A and Text Vol. p. 125 (also Hartmann et Jahn (1967) Table XII/31; Runge (1994) p. 272; Niemeyer et al. 2010 p. 78) | | | | | | | | | | | | | | | | | | | | | | 358 | | | | |
| 2. T1912 - T19-European Siberian oak (Quercus robur, Q. petraea) steppe forest | | | | | | | | | | | | | | | | | | | | | |
| **Possible climate classes** | | | | | | | | | | | | | | | | | | | | | | | | | | | | | | |
| 06 | 07 | 14 | 15 | | 16 | | 17 | | 23 | | 24 | 25 | 26 | | 27 | | 31 | 32 | 33 | | | 34 | | 35 | | 36 | 37 | | 41 | 42 |
| 43 | 44 | 45 | 46 | | 47 | | 51 | | 52 | | 53 | 54 | 55 | | 56 | | 57 | 60 | 61 | | | 62 | | 63 | | 64 | 65 | | 66 | 67 |
| **Typical site forms according to Benning et al.** **(2015)** | | | | | | | | | | | | | | | | | | | | | | | | | | | | | | |
| **Water budget levels** | | | | | | | | | | **Trophy levels** | | | | | | | | | | **Relief/ Exposition** | | | | | | | | | | |
| T1, T2, T3, T4, T5, | | | | | | | | | | e | | | | | | | | | | Sunny slope | | | | | | | | | | |
| **Typical community parameter ranges** | | | | | | | | | | | | | | | | | | | | | | | | | | | | | | |
| **Lower limit (fuzzy)** | | | | | | | | **Lower limit of optimum** | | | | | | | | **Upper limit of optimum** | | | | | | | | | **Upper limit (fuzzy)** | | | | | |
| **Base saturation (according to Kappen-Adrian) [%]** | | | | | | | | | | | | | | | | | | | | | | | | | | | | | | |
| 38 | | | | | | | | 50 | | | | | | | | 88 | | | | | | | | | 100 | | | | | |
| **pHH2O [-]** | | | | | | | | | | | | | | | | | | | | | | | | | | | | | | |
| 6 | | | | | | | | 6.2 | | | | | | | | 6.8 | | | | | | | | | >7 | | | | | |
| **C/N ratio in humus and 10 cm mineral soil layer [%C/%N]** | | | | | | | | | | | | | | | | | | | | | | | | | | | | | | |
| 15 | | | | | | | | 17 | | | | | | | | 24 | | | | | | | | | 26 | | | | | |
| **Volumetric water content in the rooted soil layer [%]** | | | | | | | | | | | | | | | | | | | | | | | | | | | | | | |
| 5 | | | | | | | | 8 | | | | | | | | 18 | | | | | | | | | 21 | | | | | |
| **Growing season length [d>10°TMT/a]** | | | | | | | | | | | | | | | | | | | | | | | | | | | | | | |
| 180 | | | | | | | | 188 | | | | | | | | 212 | | | | | | | | | 220 | | | | | |
| **Climatic water balance per vegetation month [mm/Veg.-Mon.]** | | | | | | | | | | | | | | | | | | | | | | | | | | | | | | |
| -27 | | | | | | | | -15 | | | | | | | | 23 | | | | | | | | | 35 | | | | | |
| **Solar radiation (PAR) in the growing season [kWh m-2 a-1]** | | | | | | | | | | | | | | **Lower limit (fuzzy)** | | | | | | | | | **Upper limit (fuzzy)** | | | | | | | |
| 582 | | | | | | | | | 705 | | | | | | | |
| **Lowest frost hardiness of all characteristic tree and shrub species (max. average annual low temperature) [°C]** | | | | | | | | | | | | | | | | | | | | | | | | | | | | -26 | | |
| **Natural/near-natural combination of species** | | | | | | | | | | | | | | | | | | | | | | | | | | | | | | |
| **Species** | | | | | | **Areal fraction [%]** | | | | | | | | **Species (english)** | | | | | | | **Structural element** | | | | | | | | | |
| Quercus petraea | | | | | | 60 | | | | | | | | Sessile oak | | | | | | | Main tree species 1 | | | | | | | | | |
| Acer monspessulanum | | | | | | 40 | | | | | | | | Rock maple | | | | | | | Intermediate tree layer | | | | | | | | | |
| Berberis vulgaris | | | | | | 5 | | | | | | | | Barberry | | | | | | | Upper tree/shrub layer | | | | | | | | | |
| Euphorbia cyparissias | | | | | | 10 | | | | | | | | Cypress spurge | | | | | | | Dominant herb species | | | | | | | | | |
| Viburnum lantana | | | | | | 5 | | | | | | | | Woolly snowball | | | | | | | Upper tree/shrub layer | | | | | | | | | |
| Rosa canina | | | | | | 5 | | | | | | | | Dog rose | | | | | | | Upper tree/shrub layer | | | | | | | | | |
| Rubus canescens | | | | | | 5 | | | | | | | | Gray bramble | | | | | | | Upper tree/shrub layer | | | | | | | | | |
| Prunus mahaleb | | | | | | 5 | | | | | | | | Stonecrop | | | | | | | Upper tree/shrub layer | | | | | | | | | |
| Prunus spinosa | | | | | | 5 | | | | | | | | Blackthorn | | | | | | | Upper tree/shrub layer | | | | | | | | | |
| Crataegus laevigata | | | | | | 5 | | | | | | | | Twiggy hawthorn | | | | | | | Intermediate tree layer | | | | | | | | | |

# **Aceri tartarici-Quercetum pubescenti-roboris ZÓLYOMI 1957**

| **Synonym** | | | | **1.Sources of the community relevées** | | | | | | | | | | | | | | | | | | | | | | | | **No. of relevées** | | | | |
| --- | --- | --- | --- | --- | --- | --- | --- | --- | --- | --- | --- | --- | --- | --- | --- | --- | --- | --- | --- | --- | --- | --- | --- | --- | --- | --- | --- | --- | --- | --- | --- | --- |
| **2. EUNIS-Code, mapped EUNIS class** | | | | | | | | | | | | | | | | | | | | | | | |
| Tatar maple- Downy oak forest | | | | 1. Rolecek (2005) Table 1/7 (also: Soó 1964b p. 277; Chytrý et Horák 1997 p. 206, tab. 2/1–47; Chytry et al. 2013 tab. 7/4 p. 338+316; Hegedusova et al. 2021 tab.1/5 p. 109; Donita et al. 2008) | | | | | | | | | | | | | | | | | | | | | | | | 161 | | | | |
| 2. T193 - Eastern Quercus pubescens forests | | | | | | | | | | | | | | | | | | | | | | | |
| **Possible climate classes** | | | | | | | | | | | | | | | | | | | | | | | | | | | | | | | | |
| 06 | 07 | 14 | 15 | | 16 | 17 | | 23 | | 24 | | 25 | 26 | | 27 | | | 31 | 32 | 33 | | 34 | | 35 | | | 36 | | 37 | | 41 | 42 |
| 43 | 44 | 45 | 46 | | 47 | 51 | | 52 | | 53 | | 54 | 55 | | 56 | | | 57 | 60 | 61 | | 62 | | 63 | | | 64 | | 65 | | 66 | 67 |
| **Typical site forms according to Benning et al.** **(2015)** | | | | | | | | | | | | | | | | | | | | | | | | | | | | | | | | |
| **Water budget levels** | | | | | | | | | **Trophy levels** | | | | | | | | | | | | **Relief/ Exposition** | | | | | | | | | | | |
| T1, T2, T3, T4, T5, | | | | | | | | | mo | | | | | | | | | | | | Plane, Sunny slope, Shady slope | | | | | | | | | | | |
| **Typical community parameter ranges** | | | | | | | | | | | | | | | | | | | | | | | | | | | | | | | | |
| **Lower limit (fuzzy)** | | | | | | | **Lower limit of optimum** | | | | | | | | | **Upper limit of optimum** | | | | | | | | | | **Upper limit (fuzzy)** | | | | | | |
| **Base saturation (according to Kappen-Adrian) [%]** | | | | | | | | | | | | | | | | | | | | | | | | | | | | | | | | |
| 28 | | | | | | | 42 | | | | | | | | | 86 | | | | | | | | | | 100 | | | | | | |
| **pHH2O [-]** | | | | | | | | | | | | | | | | | | | | | | | | | | | | | | | | |
| 5 | | | | | | | 5.4 | | | | | | | | | 6.6 | | | | | | | | | | 7 | | | | | | |
| **C/N ratio in humus and 10 cm mineral soil layer [%C/%N]** | | | | | | | | | | | | | | | | | | | | | | | | | | | | | | | | |
| 15 | | | | | | | 16 | | | | | | | | | 21 | | | | | | | | | | 22 | | | | | | |
| **Volumetric water content in the rooted soil layer [%]** | | | | | | | | | | | | | | | | | | | | | | | | | | | | | | | | |
| 8 | | | | | | | 12 | | | | | | | | | 23 | | | | | | | | | | 27 | | | | | | |
| **Growing season length [d>10°TMT/a]** | | | | | | | | | | | | | | | | | | | | | | | | | | | | | | | | |
| 190 | | | | | | | 195 | | | | | | | | | 215 | | | | | | | | | | 220 | | | | | | |
| **Climatic water balance per vegetation month [mm/Veg.-Mon.]** | | | | | | | | | | | | | | | | | | | | | | | | | | | | | | | | |
| -46 | | | | | | | -38 | | | | | | | | | -16 | | | | | | | | | | -8 | | | | | | |
| **Solar radiation (PAR) in the growing season [kWh m-2 a-1]** | | | | | | | | | | | | | | **Lower limit (fuzzy)** | | | | | | | | | **Upper limit (fuzzy)** | | | | | | | | | |
| 572 | | | | | | | | | 902 | | | | | | | | | |
| **Lowest frost hardiness of all characteristic tree and shrub species (max. average annual low temperature) [°C]** | | | | | | | | | | | | | | | | | | | | | | | | | | | | | | -16 | | |
| **Natural/near-natural combination of species** | | | | | | | | | | | | | | | | | | | | | | | | | | | | | | | | |
| **Species** | | | | | | | | | | | **Areal fraction [%]** | | | | | | **Species (english)** | | | | | | | | **Structural element** | | | | | | | |
| Quercus petraea polycarpa | | | | | | | | | | | 20 | | | | | | Iberian oak | | | | | | | | Main tree species 2 | | | | | | | |
| Acer tataricum | | | | | | | | | | | 10 | | | | | | Tartar maple | | | | | | | | Mixed tree species | | | | | | | |
| Quercus pubescens | | | | | | | | | | | 40 | | | | | | Downy oak | | | | | | | | Main tree species 1 | | | | | | | |
| Quercus cerris | | | | | | | | | | | 5 | | | | | | Turkey oak | | | | | | | | Secondary tree species | | | | | | | |
| Cornus mas | | | | | | | | | | | 5 | | | | | | Cornelian cherry | | | | | | | | Intermediate tree layer | | | | | | | |
| Sorbus domestica | | | | | | | | | | | 5 | | | | | | Sorb tree | | | | | | | | Intermediate tree layer | | | | | | | |
| Acer campestre | | | | | | | | | | | 5 | | | | | | Field maple | | | | | | | | Secondary tree species | | | | | | | |
| Brachypodium pinnatum | | | | | | | | | | | 40 | | | | | | Pinnate twig | | | | | | | | Dominant herb species | | | | | | | |
| Crataegus monogyna | | | | | | | | | | | 5 | | | | | | Interven. Hawthorn | | | | | | | | Upper tree/shrub layer | | | | | | | |
| Rosa canina | | | | | | | | | | | 5 | | | | | | Dog rose | | | | | | | | Upper tree/shrub layer | | | | | | | |
| Rhamnus cathartica | | | | | | | | | | | 5 | | | | | | Purging buckthorn | | | | | | | | Upper tree/shrub layer | | | | | | | |
| Ligustrum vulgare | | | | | | | | | | | 5 | | | | | | Privet | | | | | | | | Upper tree/shrub layer | | | | | | | |
| Prunus spinosa | | | | | | | | | | | 5 | | | | | | Blackthorn | | | | | | | | Upper tree/shrub layer | | | | | | | |

# **Adenostylo glabrae-Abietetum MAYER 1970**

| **Synonym** | | | | **1.Sources of the community relevées** | | | | | | | | | | | | | | | | | | | | | **No. of relevées** | | | | |
| --- | --- | --- | --- | --- | --- | --- | --- | --- | --- | --- | --- | --- | --- | --- | --- | --- | --- | --- | --- | --- | --- | --- | --- | --- | --- | --- | --- | --- | --- |
| **2. EUNIS-Code, mapped EUNIS class** | | | | | | | | | | | | | | | | | | | | |
| Adenostylo glabrae-Fire wood | | | | 1. Oberdorfer (1992) Vol IV, Tab. 339/2B and Text Vol. p. 236 | | | | | | | | | | | | | | | | | | | | | 33 | | | | |
| 2. T31121, T31-Temporary montane Norway spruce (Picea abies) forest | | | | | | | | | | | | | | | | | | | | |
| **Possible climate classes** | | | | | | | | | | | | | | | | | | | | | | | | | | | | | |
| 06 | 07 | 14 | 15 | | 16 | | 17 | 23 | | 24 | 25 | | 26 | | 27 | 31 | 32 | 33 | | 34 | | | 35 | 36 | | 37 | | 41 | 42 |
| 43 | 44 | 45 | 46 | | 47 | | 51 | 52 | | 53 | 54 | | 55 | | 56 | 57 | 60 | 61 | | 62 | | | 63 | 64 | | 65 | | 66 | 67 |
| **Typical site forms according to Benning et al. (2015)** | | | | | | | | | | | | | | | | | | | | | | | | | | | | | |
| **Water budget levels** | | | | | | | | | **Trophy levels** | | | | | | | | | | **Relief/ Exposition** | | | | | | | | | | |
| T1, T2, T3, T4, T5 | | | | | | | | | e | | | | | | | | | | Plane, Sunny slope, Shady slope | | | | | | | | | | |
| **Typical community parameter ranges** | | | | | | | | | | | | | | | | | | | | | | | | | | | | | |
| **Lower limit (fuzzy)** | | | | | | | **Lower limit of optimum** | | | | | | | | **Upper limit of optimum** | | | | | | | | **Upper limit (fuzzy)** | | | | | | |
| **Base saturation (according to Kappen-Adrian) [%]** | | | | | | | | | | | | | | | | | | | | | | | | | | | | | |
| 34 | | | | | | | 43 | | | | | | | | 100 | | | | | | | | 100 | | | | | | |
| **pHH2O [-]** | | | | | | | | | | | | | | | | | | | | | | | | | | | | | |
| 5.5 | | | | | | | 5.7 | | | | | | | | 7 | | | | | | | | >7 | | | | | | |
| **C/N ratio in humus and 10 cm mineral soil layer [%C/%N]** | | | | | | | | | | | | | | | | | | | | | | | | | | | | | |
| 15 | | | | | | | 17 | | | | | | | | 24 | | | | | | | | 26 | | | | | | |
| **Volumetric water content in the rooted soil layer [%]** | | | | | | | | | | | | | | | | | | | | | | | | | | | | | |
| 8 | | | | | | | 11 | | | | | | | | 21 | | | | | | | | 23 | | | | | | |
| **Growing season length [d>10°TMT/a]** | | | | | | | | | | | | | | | | | | | | | | | | | | | | | |
| 110 | | | | | | | 118 | | | | | | | | 148 | | | | | | | | 155 | | | | | | |
| **Climatic water balance per vegetation month [mm/Veg.-Mon.]** | | | | | | | | | | | | | | | | | | | | | | | | | | | | | |
| -12 | | | | | | | 0 | | | | | | | | 55 | | | | | | | | 59 | | | | | | |
| **Solar radiation (PAR) in the growing season [kWh m-2 a-1]** | | | | | | | | | | | | **Lower limit (fuzzy)** | | | | | | | | | **Upper limit (fuzzy)** | | | | | | | | |
| 756 | | | | | | | | | 872 | | | | | | | | |
| **Lowest frost hardiness of all characteristic tree and shrub species (max. average annual low temperature) [°C]** | | | | | | | | | | | | | | | | | | | | | | | | | | | -24 | | |
| **Natural/near-natural combination of species** | | | | | | | | | | | | | | | | | | | | | | | | | | | | | |
| **Species** | | | | | | **Degree of coverage(%)** | | | | | | | | **Species (english)** | | | | | | | | **Structural element** | | | | | | | |
| Picea abies | | | | | | 35 | | | | | | | | Norway spruce | | | | | | | | Main tree species 1 | | | | | | | |
| Abies alba | | | | | | 30 | | | | | | | | Silver fir | | | | | | | | Main tree species 2 | | | | | | | |
| Fagus sylvatica | | | | | | 5 | | | | | | | | European beech | | | | | | | | Mixed tree species | | | | | | | |
| Sorbus aucuparia | | | | | | 5 | | | | | | | | Mountain ash | | | | | | | | Intermediate tree layer | | | | | | | |
| Acer pseudoplatanus | | | | | | 5 | | | | | | | | Mountain maple | | | | | | | | Secondary tree species | | | | | | | |
| Vaccinium myrtillus | | | | | | 2 | | | | | | | | Blueberry | | | | | | | | Dominant herb species | | | | | | | |
| Hieracium sylvaticum | | | | | | 20 | | | | | | | | Wall hawkweed | | | | | | | | Dominant herb species | | | | | | | |
| Athyrium filix-femina | | | | | | 40 | | | | | | | | Common lady-fern | | | | | | | | Dominant herb species | | | | | | | |
| Polytrichum formosum | | | | | | 20 | | | | | | | | Beautiful lady's moss | | | | | | | | Dominant herb species | | | | | | | |

# **Adenostylo glabrae-Piceetum MAYER 1970**

| **Synonym** | | | | **1.Sources of the community relevées** | | | | | | | | | | | | | | | | | | | | | | | **No. of relevées** | | | |
| --- | --- | --- | --- | --- | --- | --- | --- | --- | --- | --- | --- | --- | --- | --- | --- | --- | --- | --- | --- | --- | --- | --- | --- | --- | --- | --- | --- | --- | --- | --- |
| **2. EUNIS-Code, mapped EUNIS class** | | | | | | | | | | | | | | | | | | | | | | |
| Adenostylo glabrae- Norway spruce Wood | | | | 1. Oberdorfer (1992) Vol IV, Tab. 271/12a and Text Vol. p. 73; Willner et Grabherr (2007) Table 33/7 | | | | | | | | | | | | | | | | | | | | | | | 369 | | | |
| 2. T31121, T31-Temporary montane Norway spruce (Picea abies) forest | | | | | | | | | | | | | | | | | | | | | | |
| **Possible climate classes** | | | | | | | | | | | | | | | | | | | | | | | | | | | | | | |
| 06 | 07 | 14 | 15 | | 16 | | 17 | 23 | 24 | 25 | | | 26 | | 27 | 31 | 32 | | 33 | | 34 | | | 35 | 36 | 37 | | | 41 | 42 |
| 43 | 44 | 45 | 46 | | 47 | | 51 | 52 | 53 | 54 | | | 55 | | 56 | 57 | 60 | | 61 | | 62 | | | 63 | 64 | 65 | | | 66 | 67 |
| **Typical site forms according to Benning et al.** **(2015)** | | | | | | | | | | | | | | | | | | | | | | | | | | | | | | |
| **Water budget levels** | | | | | | | | **Trophy levels** | | | | | | | | | | **Relief/ Exposition** | | | | | | | | | | | | |
| T1, T2, T3, T4, T5 | | | | | | | | e | | | | | | | | | | Plane, Sunny slope, Shady slope | | | | | | | | | | | | |
| **Typical community parameter ranges** | | | | | | | | | | | | | | | | | | | | | | | | | | | | | | |
| **Lower limit (fuzzy)** | | | | | | **Lower limit of optimum** | | | | | | | | **Upper limit of optimum** | | | | | | | | | **Upper limit (fuzzy)** | | | | | | | |
| **Base saturation (according to Kappen-Adrian) [%]** | | | | | | | | | | | | | | | | | | | | | | | | | | | | | | |
| 35 | | | | | | | 43 | | | | | | | | 100 | | | | | | | | | 100 | | | | | | |
| **pHH2O [-]** | | | | | | | | | | | | | | | | | | | | | | | | | | | | | | |
| 5.7 | | | | | | | 5.9 | | | | | | | | 7 | | | | | | | | | >7 | | | | | | |
| **C/N ratio in humus and 10 cm mineral soil layer [%C/%N]** | | | | | | | | | | | | | | | | | | | | | | | | | | | | | | |
| 15 | | | | | | | 17 | | | | | | | | 24 | | | | | | | | | 26 | | | | | | |
| **Volumetric water content in the rooted soil layer [%]** | | | | | | | | | | | | | | | | | | | | | | | | | | | | | | |
| 8 | | | | | | | 10 | | | | | | | | 17 | | | | | | | | | 19 | | | | | | |
| **Growing season length [d>10°TMT/a]** | | | | | | | | | | | | | | | | | | | | | | | | | | | | | | |
| 100 | | | | | | | 107 | | | | | | | | 133 | | | | | | | | | 140 | | | | | | |
| **Climatic water balance per vegetation month [mm/Veg.-Mon.]** | | | | | | | | | | | | | | | | | | | | | | | | | | | | | | |
| -17 | | | | | | | 3 | | | | | | | | 55 | | | | | | | | | 59 | | | | | | |
| **Solar radiation (PAR) in the growing season [kWh m-2 a-1]** | | | | | | | | | | | **Lower limit (fuzzy)** | | | | | | | | | | | **Upper limit (fuzzy)** | | | | | | | | |
| 420 | | | | | | | | | | | 636 | | | | | | | | |
| **Lowest frost hardiness of all characteristic tree and shrub species (max. average annual low temperature) [°C]** | | | | | | | | | | | | | | | | | | | | | | | | | | | | -24 | | |
| **Natural/near-natural combination of species** | | | | | | | | | | | | | | | | | | | | | | | | | | | | | | |
| **Species** | | | | | | **Areal fraction [%]** | | | | | | **Species (english)** | | | | | | | | **Structural element** | | | | | | | | | | |
| Picea abies | | | | | | 50 | | | | | | Norway spruce | | | | | | | | Main tree species 1 | | | | | | | | | | |
| Sorbus aria | | | | | | 10 | | | | | | Common whitebeam | | | | | | | | Intermediate tree layer | | | | | | | | | | |
| Sorbus aucuparia | | | | | | 10 | | | | | | Mountain-ash | | | | | | | | Intermediate tree layer | | | | | | | | | | |
| Acer pseudoplatanus | | | | | | 10 | | | | | | Golden sycamore | | | | | | | | Mixed tree species | | | | | | | | | | |
| Carex alba | | | | | | 10 | | | | | | White sedge | | | | | | | | Dominant herb species | | | | | | | | | | |
| Adenostyles alpina | | | | | | 10 | | | | | | Alpine plantain | | | | | | | | Dominant herb species | | | | | | | | | | |
| Hylocomium splendens | | | | | | 5 | | | | | | Stack moss | | | | | | | | Dominant moss species | | | | | | | | | | |

# **Adoxo moschatellinae-Aceretum pseudoplatani PASSARGE 1959**

| **Synonym** | | | | | | | | | **1.Sources of the community relevées** | | | | | | | | | | | | | | | | | **No. of relevées** | | |
| --- | --- | --- | --- | --- | --- | --- | --- | --- | --- | --- | --- | --- | --- | --- | --- | --- | --- | --- | --- | --- | --- | --- | --- | --- | --- | --- | --- | --- |
| **2. EUNIS-Code Community group** | | | | | | | | | | | | | | | | |
| Ash-mountain maple forest  Aceri pseudoplatani-Fraxinetum excelsioris W. Koch 1926 | | | | | | | | | Oberdorfer (1992) Vol IV, Table 322/10B and Text Vol. p. 191 (also Schmidt (2002) 13.2, Table 2/10/2; Berg et al 2001 Table 34.1.1.1 and Text p. 381; Niemeyer et al. 2010 p. 61; Hofmann et Pommer 2013 p. 384; Schubert 2001 p. 51) | | | | | | | | | | | | | | | | | 661 | | |
| T1311, T13-Temperate hardwood riparian forest | | | | | | | | | | | | | | | | |
| **Possible climate classes** | | | | | | | | | | | | | | | | | | | | | | | | | | | | |
| 06 | 07 | 14 | 15 | 16 | | 17 | 23 | | 24 | 25 | | 26 | | 27 | 31 | 32 | 33 | | 34 | | 35 | | 36 | 37 | | | 41 | 42 |
| 43 | 44 | 45 | 46 | 47 | | 51 | 52 | | 53 | 54 | | 55 | | 56 | 57 | 60 | 61 | | 62 | | 63 | | 64 | 65 | | | 66 | 67 |
| **Typical site forms according to Benning et al.** **(2015)** | | | | | | | | | | | | | | | | | | | | | | | | | | | | |
| **Water budget levels** | | | | | | | | **Trophy levels** | | | | | | | | | | **Relief/ Exposition** | | | | | | | | | | |
| T3 | | | | | | | | e | | | | | | | | | | Plane, Sunny slope, Shady slope | | | | | | | | | | |
| **Typical community parameter ranges** | | | | | | | | | | | | | | | | | | | | | | | | | | | | |
| **Lower limit (fuzzy)** | | | | | | **Lower limit of optimum** | | | | | | | | **Upper limit of optimum** | | | | | | | **Upper limit (fuzzy)** | | | | | | | |
| **Base saturation (according to Kappen-Adrian) [%]** | | | | | | | | | | | | | | | | | | | | | | | | | | | | |
| 23 | | | | | | 38 | | | | | | | | 100 | | | | | | | 100 | | | | | | | |
| **pHH2O [-]** | | | | | | | | | | | | | | | | | | | | | | | | | | | | |
| 4.5 | | | | | | 5.2 | | | | | | | | 7.0 | | | | | | | 8 | | | | | | | |
| **C/N ratio in humus and 10 cm mineral soil layer [%C/%N]** | | | | | | | | | | | | | | | | | | | | | | | | | | | | |
| 15 | | | | | | 17 | | | | | | | | 24 | | | | | | | 26 | | | | | | | |
| **Volumetric water content in the rooted soil layer [%]** | | | | | | | | | | | | | | | | | | | | | | | | | | | | |
| 8 | | | | | | 15 | | | | | | | | 38 | | | | | | | 45 | | | | | | | |
| **Growing season length [d>10°TMT/a]** | | | | | | | | | | | | | | | | | | | | | | | | | | | | |
| 110 | | | | | | 126 | | | | | | | | 174 | | | | | | | 190 | | | | | | | |
| **Climatic water balance per vegetation month [mm/Veg.-Mon.]** | | | | | | | | | | | | | | | | | | | | | | | | | | | | |
| -27 | | | | | | 50 | | | | | | | | 227 | | | | | | | 291 | | | | | | | |
| **Solar radiation (PAR) in the growing season [kWh m-2 a-1]** | | | | | | | | | | | **Lower limit (fuzzy)** | | | | | | | | | **Upper limit (fuzzy)** | | | | | | | | |
| 300 | | | | | | | | | 627 | | | | | | | | |
| **Lowest frost hardiness of all characteristic tree and shrub species (max. average annual low temperature) [°C]** | | | | | | | | | | | | | | | | | | | | | | | | | -24 | | | |
| **Natural/near-natural combination of species** | | | | | | | | | | | | | | | | | | | | | | | | | | | | |
| Species | | | | | Areal fraction [%] | | | | | | | | Species (english) | | | | | | | | | Structural element | | | | | | |
| Fraxinus excelsior | | | | | 60 | | | | | | | | Common ash | | | | | | | | | Main tree species 1 | | | | | | |
| Carpinus betulus | | | | | 10 | | | | | | | | Hornbeam | | | | | | | | | Secondary tree species | | | | | | |
| Quercus robur | | | | | 10 | | | | | | | | Pedunculate oak | | | | | | | | | Secondary tree species | | | | | | |
| Ulmus glabra | | | | | 40 | | | | | | | | Mountain elm | | | | | | | | | Mixed tree species | | | | | | |
| Acer pseudoplatanus | | | | | 25 | | | | | | | | Golden sycamore | | | | | | | | | Main tree species 2 | | | | | | |
| Sambucus nigra | | | | | 30 | | | | | | | | Black elder | | | | | | | | | Upper tree/shrub layer | | | | | | |
| Corylus avellana | | | | | 30 | | | | | | | | Hazelnut | | | | | | | | | Upper tree/shrub layer | | | | | | |
| Hedera helix | | | | | 20 | | | | | | | | Common ivy | | | | | | | | | Upper tree/shrub layer | | | | | | |
| Oxalis acetosella | | | | | 20 | | | | | | | | Wood sorrel | | | | | | | | | Dominant herb species | | | | | | |
| Milium effusum | | | | | 10 | | | | | | | | Wood avens | | | | | | | | | Dominant herb species | | | | | | |
| Aegopodium podagraria | | | | | 20 | | | | | | | | Ground elder | | | | | | | | | Dominant herb species | | | | | | |
| Urtica dioica | | | | | 20 | | | | | | | | Large stinging nettle | | | | | | | | | Dominant herb species | | | | | | |

# **Agrostio-Quercetum roboris deschampsietosum PASSARGE 1953**

| **Synonym** | | | | | | | | | | | | | | | **1.Sources of the community relevées** | | | | | | | | | | | | | **No. of relevées** | | | |
| --- | --- | --- | --- | --- | --- | --- | --- | --- | --- | --- | --- | --- | --- | --- | --- | --- | --- | --- | --- | --- | --- | --- | --- | --- | --- | --- | --- | --- | --- | --- | --- |
| **2. EUNIS-Code, mapped EUNIS class** | | | | | | | | | | | | |
| Common bent-oak forest (Wiregrass subass.)  Betulo pendulae-Quercetum roboris deschampsietosum Tx. 1930 | | | | | | | | | | | | | | | Passarge et Hofmann (1968) Tab. 30b (also: Pallas 2000 Tab. 1/1-6) | | | | | | | | | | | | | 73 | | | |
| T1B7 - Medio-European acidophilous Quercus forests | | | | | | | | | | | | |
| **Possible climate classes** | | | | | | | | | | | | | | | | | | | | | | | | | | | | | | | |
| 06 | 07 | 14 | 15 | 16 | | 17 | | 23 | | 24 | 25 | | | 26 | | 27 | 31 | 32 | 33 | | | 34 | | 35 | | 36 | 37 | | | 41 | 42 |
| 43 | 44 | 45 | 46 | 47 | | 51 | | 52 | | 53 | 54 | | | 55 | | 56 | 57 | 60 | 61 | | | 62 | | 63 | | 64 | 65 | | | 66 | 67 |
| **Typical site forms according to Benning et al.** **(2015)** | | | | | | | | | | | | | | | | | | | | | | | | | | | | | | | |
| **Water budget levels** | | | | | | | | | **Trophy levels** | | | | | | | | | | | | **Relief/ Exposition** | | | | | | | | | | |
| T3, T4, S2 | | | | | | | | | o | | | | | | | | | | | | Plane, Shady slope | | | | | | | | | | |
| **Typical community parameter ranges** | | | | | | | | | | | | | | | | | | | | | | | | | | | | | | | |
| **Lower limit (fuzzy)** | | | | | | | **Lower limit of optimum** | | | | | | | | **Upper limit of optimum** | | | | | | | | | | **Upper limit (fuzzy)** | | | | | | |
| **Base saturation (according to Kappen-Adrian) [%]** | | | | | | | | | | | | | | | | | | | | | | | | | | | | | | | |
| 13 | | | | | | 16 | | | | | | | | | | 29 | | | | | | | | 32 | | | | | | | |
| **pHH2O [-]** | | | | | | | | | | | | | | | | | | | | | | | | | | | | | | | |
| 3.8 | | | | | | 4.1 | | | | | | | | | | 5.1 | | | | | | | | 5.4 | | | | | | | |
| **C/N ratio in humus and 10 cm mineral soil layer [%C/%N]** | | | | | | | | | | | | | | | | | | | | | | | | | | | | | | | |
| 15 | | | | | | 18 | | | | | | | | | | 28 | | | | | | | | 31 | | | | | | | |
| **Volumetric water content in the rooted soil layer [%]** | | | | | | | | | | | | | | | | | | | | | | | | | | | | | | | |
| 6 | | | | | | 10 | | | | | | | | | | 18 | | | | | | | | 27 | | | | | | | |
| **Growing season length [d>10°TMT/a]** | | | | | | | | | | | | | | | | | | | | | | | | | | | | | | | |
| 140 | | | | | | 153 | | | | | | | | | | 207 | | | | | | | | 220 | | | | | | | |
| **Climatic water balance per vegetation month [mm/Veg.-Mon.]** | | | | | | | | | | | | | | | | | | | | | | | | | | | | | | | |
| -46 | | | | | | -37 | | | | | | | | | | 2 | | | | | | | | 11 | | | | | | | |
| **Solar radiation (PAR) in the growing season [kWh m-2 a-1]** | | | | | | | | | | | | | **Lower limit (fuzzy)** | | | | | | | | | | **Upper limit (fuzzy)** | | | | | | | | |
| 377 | | | | | | | | | | 494 | | | | | | | | |
| **Lowest frost hardiness of all characteristic tree and shrub species (max. average annual low temperature) [°C]** | | | | | | | | | | | | | | | | | | | | | | | | | | | | | -26 | | |
| **Natural/near-natural combination of species** | | | | | | | | | | | | | | | | | | | | | | | | | | | | | | | |
| **Species** | | | | | **Areal fraction [%]** | | | | | | | **Species (english)** | | | | | | | | **Structural element** | | | | | | | | | | | |
| Pinus sylvestris | | | | | 15 | | | | | | | Scotch pine | | | | | | | | Main tree species 2 | | | | | | | | | | | |
| Quercus robur | | | | | 50 | | | | | | | Pedunculate oak | | | | | | | | Main tree species 1 | | | | | | | | | | | |
| Betula pendula | | | | | 2 | | | | | | | Common birch | | | | | | | | Secondary tree species | | | | | | | | | | | |
| Sorbus aucuparia | | | | | 15 | | | | | | | Mountain-ash | | | | | | | | Intermediate tree layer | | | | | | | | | | | |
| Holcus mollis | | | | | 20 | | | | | | | Soft honey-grass | | | | | | | | Dominant herb species | | | | | | | | | | | |
| Avenella flexuosa | | | | | 30 | | | | | | | Wiregrass | | | | | | | | Dominant herb species | | | | | | | | | | | |
| Melampyrum pratense | | | | | 20 | | | | | | | Meadow quail wheat | | | | | | | | Dominant herb species | | | | | | | | | | | |
| Pleurozium schreberi | | | | | 5 | | | | | | | Red stem moss | | | | | | | | Dominant moss species | | | | | | | | | | | |
| Dicranum scoparium | | | | | 5 | | | | | | | Fork-toothed moss | | | | | | | | Dominant moss species | | | | | | | | | | | |
| Polytrichum formosum | | | | | 5 | | | | | | | Beauty haircap moss | | | | | | | | Dominant moss species | | | | | | | | | | | |
| Pohlia nutans | | | | | 5 | | | | | | | Nodding Pohl moss | | | | | | | | Dominant moss species | | | | | | | | | | | |

# **Agrostio-Quercetum roboris festucetosum ovinaea PASSARGE 1953**

| **Synonym** | | | | | | | | | | | **1.Sources of the community relevées** | | | | | | | | | | | | | | | | **No. of relevées** | | | |
| --- | --- | --- | --- | --- | --- | --- | --- | --- | --- | --- | --- | --- | --- | --- | --- | --- | --- | --- | --- | --- | --- | --- | --- | --- | --- | --- | --- | --- | --- | --- |
| **2. EUNIS-Code, mapped EUNIS class** | | | | | | | | | | | | | | | |
| Common bent-oak forest (sheep's-fescue subass.),  Betulo pendulae-Quercetum roboris festucetosum Tx. 1930 | | | | | | | | | | | 1. Passarge et Hofmann (1968) Tab. 30e (also: Schubert 2001 p. 72) | | | | | | | | | | | | | | | | 71 | | | |
| 2. T1B7 - Medio-European acidophilous Quercus forests | | | | | | | | | | | | | | | |
| **Possible climate classes** | | | | | | | | | | | | | | | | | | | | | | | | | | | | | | |
| 06 | 07 | 14 | 15 | 16 | | | 17 | 23 | | 24 | | 25 | | | 26 | 27 | 31 | 32 | 33 | | | 34 | | 35 | 36 | 37 | | | 41 | 42 |
| 43 | 44 | 45 | 46 | 47 | | | 51 | 52 | | 53 | | 54 | | | 55 | 56 | 57 | 60 | 61 | | | 62 | | 63 | 64 | 65 | | | 66 | 67 |
| **Typical site forms according to Benning et al.** **(2015)** | | | | | | | | | | | | | | | | | | | | | | | | | | | | | | |
| **Water budget levels** | | | | | | | | | **Trophy levels** | | | | | | | | | | | | **Relief/ Exposition** | | | | | | | | | |
| T3, T4 | | | | | | | | | o | | | | | | | | | | | | Sunny slope | | | | | | | | | |
| **Typical community parameter ranges** | | | | | | | | | | | | | | | | | | | | | | | | | | | | | | |
| **Lower limit (fuzzy)** | | | | | | **Lower limit of optimum** | | | | | | | | | | **Upper limit of optimum** | | | | | | | | **Upper limit (fuzzy)** | | | | | | |
| **Base saturation (according to Kappen-Adrian) [%]** | | | | | | | | | | | | | | | | | | | | | | | | | | | | | | |
| 13 | | | | | | | 16 | | | | | | | | | 29 | | | | | | | | 32 | | | | | | |
| **pHH2O [-]** | | | | | | | | | | | | | | | | | | | | | | | | | | | | | | |
| 3.8 | | | | | | | 4.1 | | | | | | | | | 5.1 | | | | | | | | 5.4 | | | | | | |
| **C/N ratio in humus and 10 cm mineral soil layer [%C/%N]** | | | | | | | | | | | | | | | | | | | | | | | | | | | | | | |
| 15 | | | | | | | 18 | | | | | | | | | 28 | | | | | | | | 31 | | | | | | |
| **Volumetric water content in the rooted soil layer [%]** | | | | | | | | | | | | | | | | | | | | | | | | | | | | | | |
| 6 | | | | | | | 10 | | | | | | | | | 18 | | | | | | | | 27 | | | | | | |
| **Growing season length [d>10°TMT/a]** | | | | | | | | | | | | | | | | | | | | | | | | | | | | | | |
| 140 | | | | | | | 153 | | | | | | | | | 207 | | | | | | | | 220 | | | | | | |
| **Climatic water balance per vegetation month [mm/Veg.-Mon.]** | | | | | | | | | | | | | | | | | | | | | | | | | | | | | | |
| -46 | | | | | | | -37 | | | | | | | | | 2 | | | | | | | | 11 | | | | | | |
| **Solar radiation (PAR) in the growing season [kWh m-2 a-1]** | | | | | | | | | | | | | | **Lower limit (fuzzy)** | | | | | | | | | **Upper limit (fuzzy)** | | | | | | | |
| 414 | | | | | | | | | 610 | | | | | | | |
| **Lowest frost hardiness of all characteristic tree and shrub species (max. average annual low temperature) [°C]** | | | | | | | | | | | | | | | | | | | | | | | | | | | | -26 | | |
| **Natural/near-natural combination of species** | | | | | | | | | | | | | | | | | | | | | | | | | | | | | | |
| **Species** | | | | | **Areal fraction [%]** | | | | | | | | **Species (english)** | | | | | | | **Structural element** | | | | | | | | | | |
| Quercus robur | | | | | 55 | | | | | | | | Pedunculate oak | | | | | | | Main tree species 1 | | | | | | | | | | |
| Pinus sylvestris | | | | | 15 | | | | | | | | Scotch pine | | | | | | | Main tree species 2 | | | | | | | | | | |
| Sorbus aucuparia | | | | | 5 | | | | | | | | Mountain-ash | | | | | | | Intermediate tree layer | | | | | | | | | | |
| Agrostis tenuis | | | | | 20 | | | | | | | | Red bent-grass | | | | | | | Dominant herb species | | | | | | | | | | |
| Festuca ovina ovina | | | | | 20 | | | | | | | | Sheep’s-fescue | | | | | | | Dominant herb species | | | | | | | | | | |
| Polytrichum formosum | | | | | 5 | | | | | | | | Beauty haircap moss | | | | | | | Dominant moss species | | | | | | | | | | |
| Pohlia nutans | | | | | 5 | | | | | | | | Nodding Pohl moss | | | | | | | Dominant moss species | | | | | | | | | | |
| Pleurozium schreberi | | | | | 5 | | | | | | | | Red stem moss | | | | | | | Dominant moss species | | | | | | | | | | |
| Dicranum scoparium | | | | | 5 | | | | | | | | Common fork moss | | | | | | | Dominant moss species | | | | | | | | | | |

# **Alnetum incanae LÜDI 1921**

| **Synonym** | | | | **1.Sources of the community relevées** | | | | | | | | | | | | | | | | | | | | | | **No. of relevées** | | | |
| --- | --- | --- | --- | --- | --- | --- | --- | --- | --- | --- | --- | --- | --- | --- | --- | --- | --- | --- | --- | --- | --- | --- | --- | --- | --- | --- | --- | --- | --- |
| **2. EUNIS-Code, mapped EUNIS class** | | | | | | | | | | | | | | | | | | | | | |
| Silver alder wood | | | | 1. Oberdorfer (1992) Vol IV, Table 302/1 and Text Vol. p. 140 (also Tüxen (1937) p. 151; Matuszkiewicz et Borowik (1957) Table 1; Douda et al. 2015 Tab. A1; Onyshchenko 2009 Tab. 70; Chytry et al. 2013 tab. 5/6 p. 183+200) | | | | | | | | | | | | | | | | | | | | | | 1082 | | | |
| 2. T1121, T12-Alnus glutinosa-Alnus incana forest on riparian and mineral soils | | | | | | | | | | | | | | | | | | | | | |
| **Possible climate classes** | | | | | | | | | | | | | | | | | | | | | | | | | | | | | |
| 06 | 07 | 14 | 15 | | 16 | | 17 | 23 | | 24 | 25 | | | 26 | 27 | 31 | 32 | 33 | | | 34 | | 35 | 36 | 37 | | | 41 | 42 |
| 43 | 44 | 45 | 46 | | 47 | | 51 | 52 | | 53 | 54 | | | 55 | 56 | 57 | 60 | 61 | | | 62 | | 63 | 64 | 65 | | | 66 | 67 |
| **Typical site forms according to Benning et al.** **(2015)** | | | | | | | | | | | | | | | | | | | | | | | | | | | | | |
| **Water budget levels** | | | | | | | | | **Trophy levels** | | | | | | | | | | | **Relief/ Exposition** | | | | | | | | | |
| G2, G3, G4, G5 | | | | | | | | | mo, e | | | | | | | | | | | Plane | | | | | | | | | |
| **Typical community parameter ranges** | | | | | | | | | | | | | | | | | | | | | | | | | | | | | |
| **Lower limit (fuzzy)** | | | | | | | **Lower limit of optimum** | | | | | | | | **Upper limit of optimum** | | | | | | | | **Upper limit (fuzzy)** | | | | | | |
| **Base saturation (according to Kappen-Adrian) [%]** | | | | | | | | | | | | | | | | | | | | | | | | | | | | | |
| 26 | | | | | | | 36 | | | | | | | | 88 | | | | | | | | 100 | | | | | | |
| **pHH2O [-]** | | | | | | | | | | | | | | | | | | | | | | | | | | | | | |
| 4.8 | | | | | | | 5.2 | | | | | | | | 6.6 | | | | | | | | >7 | | | | | | |
| **C/N ratio in humus and 10 cm mineral soil layer [%C/%N]** | | | | | | | | | | | | | | | | | | | | | | | | | | | | | |
| 15 | | | | | | | 17 | | | | | | | | 24 | | | | | | | | 26 | | | | | | |
| **Volumetric water content in the rooted soil layer [%]** | | | | | | | | | | | | | | | | | | | | | | | | | | | | | |
| 21 | | | | | | | 32 | | | | | | | | 41 | | | | | | | | 43 | | | | | | |
| **Growing season length [d>10°TMT/a]** | | | | | | | | | | | | | | | | | | | | | | | | | | | | | |
| 110 | | | | | | | 119 | | | | | | | | 156 | | | | | | | | 165 | | | | | | |
| **Climatic water balance per vegetation month [mm/Veg.-Mon.]** | | | | | | | | | | | | | | | | | | | | | | | | | | | | | |
| -12 | | | | | | | 39 | | | | | | | | 241 | | | | | | | | 291 | | | | | | |
| **Solar radiation (PAR) in the growing season [kWh m-2 a-1]** | | | | | | | | | | | | | **Lower limit (fuzzy)** | | | | | | | | | **Upper limit (fuzzy)** | | | | | | | |
| 348 | | | | | | | | | 787 | | | | | | | |
| **Lowest frost hardiness of all characteristic tree and shrub species (max. average annual low temperature) [°C]** | | | | | | | | | | | | | | | | | | | | | | | | | | | -24 | | |
| **Natural/near-natural combination of species** | | | | | | | | | | | | | | | | | | | | | | | | | | | | | |
| **Species** | | | | | | **Areal fraction [%]** | | | | | | **Species (english)** | | | | | | | **Structural element** | | | | | | | | | | |
| Fraxinus excelsior | | | | | | 30 | | | | | | Common ash | | | | | | | Main tree species 1 | | | | | | | | | | |
| Alnus incana | | | | | | 30 | | | | | | Speckled alder | | | | | | | Main tree species 2 | | | | | | | | | | |
| Acer pseudoplatanus | | | | | | 5 | | | | | | Golden sycamore | | | | | | | Mixed tree species | | | | | | | | | | |
| Deschampsia cespitosa | | | | | | 10 | | | | | | Tussock hairgrass | | | | | | | Dominant herb species | | | | | | | | | | |
| Impatiens noli-tangere | | | | | | 10 | | | | | | Touch-me-not balsam | | | | | | | Dominant herb species | | | | | | | | | | |
| Stachys sylvatica | | | | | | 10 | | | | | | Hedge woundwort | | | | | | | Dominant herb species | | | | | | | | | | |
| Aegopodium podagraria | | | | | | 10 | | | | | | Bishop’s goutweed | | | | | | | Dominant herb species | | | | | | | | | | |
| Cornus sanguinea | | | | | | 5 | | | | | | Bloodtwig dogwood | | | | | | | Upper tree/shrub layer | | | | | | | | | | |
| Rubus idaeus | | | | | | 30 | | | | | | Raspberry | | | | | | | Upper tree/shrub layer | | | | | | | | | | |
| Sambucus nigra | | | | | | 5 | | | | | | Black elderberry | | | | | | | Upper tree/shrub layer | | | | | | | | | | |

# **Alnetum viridis BRAUN-BLANQUET 1918**

| **Synonym** | | | | | **1.Sources of the community relevées** | | | | | | | | | | | | | | | | | | | | | | | | **No. of relevées** | | | |
| --- | --- | --- | --- | --- | --- | --- | --- | --- | --- | --- | --- | --- | --- | --- | --- | --- | --- | --- | --- | --- | --- | --- | --- | --- | --- | --- | --- | --- | --- | --- | --- | --- |
| **2. EUNIS-Code, mapped EUNIS class** | | | | | | | | | | | | | | | | | | | | | | | |
| Green alder scrub | | | | | 1. Horvat, Glavac, Ellenberg (1974) Table 133 (also Horvat, Pawlowski, Walas (1937); Willner et Grabherr (2007) Table 10/2; Schmider et Burnand 1988 p. 164) | | | | | | | | | | | | | | | | | | | | | | | | 131 | | | |
| 2. S2511 Subalpine Green alder brush | | | | | | | | | | | | | | | | | | | | | | | |
| **Possible climate classes** | | | | | | | | | | | | | | | | | | | | | | | | | | | | | | | | |
| 06 | 07 | 14 | 15 | | | 16 | | 17 | 23 | | 24 | | 25 | | 26 | | 27 | 31 | 32 | | 33 | | 34 | | | 35 | 36 | 37 | | | 41 | 42 |
| 43 | 44 | 45 | 46 | | | 47 | | 51 | 52 | | 53 | | 54 | | 55 | | 56 | 57 | 60 | | 61 | | 62 | | | 63 | 64 | 65 | | | 66 | 67 |
| **Typical site forms according to Benning et al. (2015)** | | | | | | | | | | | | | | | | | | | | | | | | | | | | | | | | |
| **Water budget levels** | | | | | | | | | | **Trophy levels** | | | | | | | | | | | | **Relief/ Exposition** | | | | | | | | | | |
| S3, S4, G2, G3, G4, G5, G6 | | | | | | | | | | mo | | | | | | | | | | | | Plane, Shady slope, Sunny slope | | | | | | | | | | |
| **Typical community parameter ranges** | | | | | | | | | | | | | | | | | | | | | | | | | | | | | | | | |
| **Lower limit (fuzzy)** | | | | | | | **Lower limit of optimum** | | | | | | | | | **Upper limit of optimum** | | | | | | | | | **Upper limit (fuzzy)** | | | | | | | |
| **Base saturation (according to Kappen-Adrian) [%]** | | | | | | | | | | | | | | | | | | | | | | | | | | | | | | | | |
| 24 | | | | | | | | 27 | | | | | | | | | 39 | | | | | | | | | 42 | | | | | | |
| **pHH2O [-]** | | | | | | | | | | | | | | | | | | | | | | | | | | | | | | | | |
| 4.6 | | | | | | | | 4.7 | | | | | | | | | 5.3 | | | | | | | | | 5.4 | | | | | | |
| **C/N ratio in humus and 10 cm mineral soil layer [%C/%N]** | | | | | | | | | | | | | | | | | | | | | | | | | | | | | | | | |
| 15 | | | | | | | | 17 | | | | | | | | | 24 | | | | | | | | | 26 | | | | | | |
| **Volumetric water content in the rooted soil layer [%]** | | | | | | | | | | | | | | | | | | | | | | | | | | | | | | | | |
| 28 | | | | | | | | 43 | | | | | | | | | 58 | | | | | | | | | 60 | | | | | | |
| **Growing season length [d>10°TMT/a]** | | | | | | | | | | | | | | | | | | | | | | | | | | | | | | | | |
| 65 | | | | | | | | 73 | | | | | | | | | 107 | | | | | | | | | 115 | | | | | | |
| **Climatic water balance per vegetation month [mm/Veg.-Mon.]** | | | | | | | | | | | | | | | | | | | | | | | | | | | | | | | | |
| 11 | | | | | | | | 29 | | | | | | | | | 99 | | | | | | | | | 117 | | | | | | |
| **Solar radiation (PAR) in the growing season [kWh m-2 a-1]** | | | | | | | | | | | | | | **Lower limit (fuzzy)** | | | | | | | | | | **Upper limit (fuzzy)** | | | | | | | | |
| 266 | | | | | | | | | | 526 | | | | | | | | |
| **Lowest frost hardiness of all characteristic tree and shrub species (max. average annual low temperature) [°C]** | | | | | | | | | | | | | | | | | | | | | | | | | | | | | | -30 | | |
| **Natural/near-natural combination of species** | | | | | | | | | | | | | | | | | | | | | | | | | | | | | | | | |
| **Species** | | | | **Areal fraction [%]** | | | | | | | | **Species (english)** | | | | | | | | **Structural element** | | | | | | | | | | | | |
| Alnus viridis | | | | 30 | | | | | | | | Green alder | | | | | | | | Main tree species 1 | | | | | | | | | | | | |
| Milium effusum | | | | 15 | | | | | | | | Wood millet | | | | | | | | Dominant herb species | | | | | | | | | | | | |
| Ranunculus acris | | | | 20 | | | | | | | | Tall buttercup | | | | | | | | Dominant herb species | | | | | | | | | | | | |
| Rumex arifolius | | | | 20 | | | | | | | | Mountain sorrel | | | | | | | | Dominant herb species | | | | | | | | | | | | |
| Petasites albus | | | | 20 | | | | | | | | white butterbur | | | | | | | | Dominant herb species | | | | | | | | | | | | |
| Cicerbita alpina | | | | 5 | | | | | | | | Alpine milkvetch | | | | | | | | Dominant moss species | | | | | | | | | | | | |

# **Arbuto unedonis-Quercetum pyrenaicae RIVAS GODAY ex RIVAS-MARTINEZ 1987**

| **Synonym** | | | | | | **1.Sources of the community relevées** | | | | | | | | | | | | | | | | | | | | **No. of relevées** | | | |
| --- | --- | --- | --- | --- | --- | --- | --- | --- | --- | --- | --- | --- | --- | --- | --- | --- | --- | --- | --- | --- | --- | --- | --- | --- | --- | --- | --- | --- | --- |
| **2. EUNIS-Code, mapped EUNIS class** | | | | | | | | | | | | | | | | | | | |
| Arbutus-Pyrenean oak wood | | | | | | 1. Vilches de la Serna et al. (2016) Tab. 4 | | | | | | | | | | | | | | | | | | | | 28 | | | |
| 2. T19A12 Iberian sub-continental Quercus pyrenaica forests | | | | | | | | | | | | | | | | | | | |
| **Possible climate classes** | | | | | | | | | | | | | | | | | | | | | | | | | | | | | |
| 06 | 07 | 14 | 15 | 16 | | | 17 | 23 | | 24 | 25 | | | 26 | 27 | 31 | 32 | 33 | | | 34 | | 35 | 36 | 37 | | | 41 | 42 |
| 43 | 44 | 45 | 46 | 47 | | | 51 | 52 | | 53 | 54 | | | 55 | 56 | 57 | 60 | 61 | | | 62 | | 63 | 64 | 65 | | | 66 | 67 |
| **Typical site forms according to Benning et al.** **(2015)** | | | | | | | | | | | | | | | | | | | | | | | | | | | | | |
| **Water budget levels** | | | | | | | | | **Trophy levels** | | | | | | | | | | | **Relief/ Exposition** | | | | | | | | | |
| T1, T2, T3, T4, T5 | | | | | | | | | mo | | | | | | | | | | | Plane, Shady slope, Sunny slope | | | | | | | | | |
| **Typical community parameter ranges** | | | | | | | | | | | | | | | | | | | | | | | | | | | | | |
| **Lower limit (fuzzy)** | | | | | | | **Lower limit of optimum** | | | | | | | | **Upper limit of optimum** | | | | | | | | **Upper limit (fuzzy)** | | | | | | |
| **Base saturation (according to Kappen-Adrian) [%]** | | | | | | | | | | | | | | | | | | | | | | | | | | | | | |
| 25 | | | | | | | 30 | | | | | | | | 45 | | | | | | | | 50 | | | | | | |
| **pHH2O [-]** | | | | | | | | | | | | | | | | | | | | | | | | | | | | | |
| 4.7 | | | | | | | 5.0 | | | | | | | | 5.9 | | | | | | | | 6.2 | | | | | | |
| **C/N ratio in humus and 10 cm mineral soil layer [%C/%N]** | | | | | | | | | | | | | | | | | | | | | | | | | | | | | |
| 18 | | | | | | | 20 | | | | | | | | 24 | | | | | | | | 26 | | | | | | |
| **Volumetric water content in the rooted soil layer [%]** | | | | | | | | | | | | | | | | | | | | | | | | | | | | | |
| 8 | | | | | | | 10 | | | | | | | | 16 | | | | | | | | 18 | | | | | | |
| **Growing season length [d>10°TMT/a]** | | | | | | | | | | | | | | | | | | | | | | | | | | | | | |
| 220 | | | | | | | 228 | | | | | | | | 252 | | | | | | | | 260 | | | | | | |
| **Climatic water balance per vegetation month [mm/Veg.-Mon.]** | | | | | | | | | | | | | | | | | | | | | | | | | | | | | |
| -12 | | | | | | | 4 | | | | | | | | 65 | | | | | | | | 70 | | | | | | |
| **Solar radiation (PAR) in the growing season [kWh m-2 a-1]** | | | | | | | | | | | | | **Lower limit (fuzzy)** | | | | | | | | | **Upper limit (fuzzy)** | | | | | | | |
| 919 | | | | | | | | | 1172 | | | | | | | |
| **Lowest frost hardiness of all characteristic tree and shrub species (max. average annual low temperature) [°C]** | | | | | | | | | | | | | | | | | | | | | | | | | | | -17 | | |
| **Natural/near-natural combination of species** | | | | | | | | | | | | | | | | | | | | | | | | | | | | | |
| **Species** | | | | | **Areal fraction [%]** | | | | | | | **Species (english)** | | | | | | | **Structural element** | | | | | | | | | | |
| Quercus pyrenaica | | | | | 80 | | | | | | | Pyrenean oak | | | | | | | Main tree species 1 | | | | | | | | | | |
| Castanea sativa | | | | | 2 | | | | | | | Chestnut | | | | | | | Intermediate tree layer | | | | | | | | | | |
| Arbutus unido | | | | | 2 | | | | | | | Western strawberry tree | | | | | | | Intermediate tree layer | | | | | | | | | | |
| Carex distachya | | | | | 5 | | | | | | | Long-bristled sedge | | | | | | | Dominant herb species | | | | | | | | | | |
| Holcus mollis | | | | | 5 | | | | | | | Creeping softgrass | | | | | | | Dominant herb species | | | | | | | | | | |
| Lonicera periclymenum | | | | | 2 | | | | | | | Honeysuckle | | | | | | | Upper tree/shrub layer | | | | | | | | | | |
| Cytisus scoparius | | | | | 2 | | | | | | | Common broom | | | | | | | Upper tree/shrub layer | | | | | | | | | | |
| Crataegus monogyna | | | | | 2 | | | | | | | Common hawthorn | | | | | | | Intermediate tree layer | | | | | | | | | | |

# **Arunco dioici-Aceretum pseudoplatani MOOR 1952**

| **Synonym** | | | | | **1.Sources of the community relevées** | | | | | | | | | | | | | | | | | | | | | | **No. of relevées** | | | |
| --- | --- | --- | --- | --- | --- | --- | --- | --- | --- | --- | --- | --- | --- | --- | --- | --- | --- | --- | --- | --- | --- | --- | --- | --- | --- | --- | --- | --- | --- | --- |
| **2. EUNIS-Code, mapped EUNIS class** | | | | | | | | | | | | | | | | | | | | | |
| Honeysuckle- Sycamore wood,  Fraxino-Aceretum W. Koch ex Tx. 1937 | | | | | 1. Willner et Grabherr (2007) Vol 1 p. 133 et Table 19/11 (also Mucina et al. (1993 )Teil III, p. 118; Onyshchenko 2009 Tab. 66; Chytry et al. 2013 tab. 6/17 p. 237+289) | | | | | | | | | | | | | | | | | | | | | | 286 | | | |
| 2. T1F1-Medio-European ravine forests | | | | | | | | | | | | | | | | | | | | | |
| **Possible climate classes** | | | | | | | | | | | | | | | | | | | | | | | | | | | | | | |
| 06 | 07 | 14 | 15 | 16 | | 17 | | 23 | | 24 | 25 | | 26 | | 27 | 31 | 32 | 33 | | | 34 | | | 35 | 36 | 37 | | | 41 | 42 |
| 43 | 44 | 45 | 46 | 47 | | 51 | | 52 | | 53 | 54 | | 55 | | 56 | 57 | 60 | 61 | | | 62 | | | 63 | 64 | 65 | | | 66 | 67 |
| **Typical site forms according to Benning et al. (2015)** | | | | | | | | | | | | | | | | | | | | | | | | | | | | | | |
| **Water budget levels** | | | | | | | | | **Trophy levels** | | | | | | | | | | **Relief/ Exposition** | | | | | | | | | | | |
| S3, S4, G2, G3 | | | | | | | | | e, mo | | | | | | | | | | Plane, Sunny slope, Shady slope | | | | | | | | | | | |
| **Typical community parameter ranges** | | | | | | | | | | | | | | | | | | | | | | | | | | | | | | |
| **Lower limit (fuzzy)** | | | | | | **Lower limit of optimum** | | | | | | | | **Upper limit of optimum** | | | | | | | | | **Upper limit (fuzzy)** | | | | | | | |
| **Base saturation (according to Kappen-Adrian) [%]** | | | | | | | | | | | | | | | | | | | | | | | | | | | | | | |
| 23 | | | | | | 33 | | | | | | | | | 87 | | | | | | | | | 100 | | | | | | |
| **pHH2O [-]** | | | | | | | | | | | | | | | | | | | | | | | | | | | | | | |
| 4.5 | | | | | | 4.9 | | | | | | | | | 6.6 | | | | | | | | | >7 | | | | | | |
| **C/N ratio in humus and 10 cm mineral soil layer [%C/%N]** | | | | | | | | | | | | | | | | | | | | | | | | | | | | | | |
| 12 | | | | | | 14 | | | | | | | | | 24 | | | | | | | | | 26 | | | | | | |
| **Volumetric water content in the rooted soil layer [%]** | | | | | | | | | | | | | | | | | | | | | | | | | | | | | | |
| 8 | | | | | | 11 | | | | | | | | | 25 | | | | | | | | | 28 | | | | | | |
| **Growing season length [d>10°TMT/a]** | | | | | | | | | | | | | | | | | | | | | | | | | | | | | | |
| 110 | | | | | | 128 | | | | | | | | | 202 | | | | | | | | | 220 | | | | | | |
| **Climatic water balance per vegetation month [mm/Veg.-Mon.]** | | | | | | | | | | | | | | | | | | | | | | | | | | | | | | |
| -27 | | | | | | 26 | | | | | | | | | 238 | | | | | | | | | 291 | | | | | | |
| **Solar radiation (PAR) in the growing season [kWh m-2 a-1]** | | | | | | | | | | | | **Lower limit (fuzzy)** | | | | | | | | | | **Upper limit (fuzzy)** | | | | | | | | |
| 360 | | | | | | | | | | 697 | | | | | | | | |
| **Lowest frost hardiness of all characteristic tree and shrub species (max. average annual low temperature) [°C]** | | | | | | | | | | | | | | | | | | | | | | | | | | | | -24 | | |
| **Natural/near-natural combination of species** | | | | | | | | | | | | | | | | | | | | | | | | | | | | | | |
| **Species** | | | | | | | **Areal fraction [%]** | | | | | | **Species (english)** | | | | | | | **Structural element** | | | | | | | | | | |
| Fagus sylvatica | | | | | | | 15 | | | | | | European beech | | | | | | | Secondary tree species | | | | | | | | | | |
| Fraxinus excelsior | | | | | | | 25 | | | | | | Common ash | | | | | | | Main tree species 2 | | | | | | | | | | |
| Ulmus glabra | | | | | | | 15 | | | | | | Wych elm | | | | | | | Mixed tree species | | | | | | | | | | |
| Acer pseudoplatanus | | | | | | | 25 | | | | | | Golden sycamore | | | | | | | Main tree species 1 | | | | | | | | | | |
| Athyrium filix-femina | | | | | | | 15 | | | | | | Common lady-fern | | | | | | | Dominant herb species | | | | | | | | | | |
| Oxalis acetosella | | | | | | | 10 | | | | | | Wood sorrel | | | | | | | Dominant herb species | | | | | | | | | | |
| Dryopteris filix-mas | | | | | | | 10 | | | | | | Male wood fern | | | | | | | Dominant herb species | | | | | | | | | | |
| Mercurialis perennis | | | | | | | 15 | | | | | | Dog mercury | | | | | | | Dominant herb species | | | | | | | | | | |
| Lamium galeobdolon | | | | | | | 10 | | | | | | Yellow archangel | | | | | | | Dominant herb species | | | | | | | | | | |
| Corylus avellana | | | | | | | 15 | | | | | | Hazel | | | | | | | Intermediate tree layer | | | | | | | | | | |

# **Aspenrulo odorati-Fagetum sylvatici dryopteridetosum SCAMONI 1967**

| **Synonym** | | | | | | | | **1.Sources of the community relevées** | | | | | | | | | | | | | | | | | **No. of relevées** | | | |
| --- | --- | --- | --- | --- | --- | --- | --- | --- | --- | --- | --- | --- | --- | --- | --- | --- | --- | --- | --- | --- | --- | --- | --- | --- | --- | --- | --- | --- |
| **2. EUNIS-Code, mapped EUNIS class** | | | | | | | | | | | | | | | | |
| Woodruff-Beech forest (worm fern subass.)  Galio odorati-Fagetum dryopteridetosum Sougnez et Thill 1959 | | | | | | | | 1. Passarge et Hofmann (1968) Tab. 15f (also Schmidt (2002) 1.1.1, Tab. 2/1/3.1; Oberdorfer (1992) Vol IV, Tab. 331/6 and Text Vol. p. 212; Tüxen (1937) p. 142) | | | | | | | | | | | | | | | | | 72 | | | |
| 2. T171, T17-Fagus forest on non-acid soils | | | | | | | | | | | | | | | | |
| **Possible climate classes** | | | | | | | | | | | | | | | | | | | | | | | | | | | | |
| 06 | 07 | 14 | 15 | 16 | | 17 | 23 | | 24 | 25 | | | 26 | 27 | 31 | 32 | 33 | 34 | | | | 35 | 36 | 37 | | | 41 | 42 |
| 43 | 44 | 45 | 46 | 47 | | 51 | 52 | | 53 | 54 | | | 55 | 56 | 57 | 60 | 61 | 62 | | | | 63 | 64 | 65 | | | 66 | 67 |
| **Typical site forms according to Benning et al. (2015)** | | | | | | | | | | | | | | | | | | | | | | | | | | | | |
| **Water budget levels** | | | | | | | | **Trophy levels** | | | | | | | | | | | **Relief/ Exposition** | | | | | | | | | |
| T1, T2, T3, T4, T5 | | | | | | | | mo | | | | | | | | | | | Shady slope | | | | | | | | | |
| **Typical community parameter ranges** | | | | | | | | | | | | | | | | | | | | | | | | | | | | |
| **Lower limit (fuzzy)** | | | | | | **Lower limit of optimum** | | | | | | | | **Upper limit of optimum** | | | | | | | | **Upper limit (fuzzy)** | | | | | | |
| **Base saturation (according to Kappen-Adrian) [%]** | | | | | | | | | | | | | | | | | | | | | | | | | | | | |
| 16 | | | | | | 19 | | | | | | | | 29 | | | | | | | | 40 | | | | | | |
| **pHH2O [-]** | | | | | | | | | | | | | | | | | | | | | | | | | | | | |
| 4 | | | | | | 4.2 | | | | | | | | 5.2 | | | | | | | | 5.4 | | | | | | |
| **C/N ratio in humus and 10 cm mineral soil layer [%C/%N]** | | | | | | | | | | | | | | | | | | | | | | | | | | | | |
| 15 | | | | | | 18 | | | | | | | | 28 | | | | | | | | 31 | | | | | | |
| **Volumetric water content in the rooted soil layer [%]** | | | | | | | | | | | | | | | | | | | | | | | | | | | | |
| 7 | | | | | | 24 | | | | | | | | 27 | | | | | | | | 28 | | | | | | |
| **Growing season length [d>10°TMT/a]** | | | | | | | | | | | | | | | | | | | | | | | | | | | | |
| 115 | | | | | | 128 | | | | | | | | 178 | | | | | | | | 190 | | | | | | |
| **Climatic water balance per vegetation month [mm/Veg.-Mon.]** | | | | | | | | | | | | | | | | | | | | | | | | | | | | |
| -22 | | | | | | -7 | | | | | | | | 54 | | | | | | | | 70 | | | | | | |
| **Solar radiation (PAR) in the growing season [kWh m-2 a-1]** | | | | | | | | | | | **Lower limit (fuzzy)** | | | | | | | | | | **Upper limit (fuzzy)** | | | | | | | |
| 320 | | | | | | | | | | 601 | | | | | | | |
| **Lowest frost hardiness of all characteristic tree and shrub species (max. average annual low temperature) [°C]** | | | | | | | | | | | | | | | | | | | | | | | | | | -24 | | |
| **Natural/near-natural combination of species** | | | | | | | | | | | | | | | | | | | | | | | | | | | | |
| **Species** | | | | | **Areal fraction [%]** | | | | | | | **Species (english)** | | | | | | | | **Structural element** | | | | | | | | |
| Fagus sylvatica | | | | | 80 | | | | | | | European beech | | | | | | | | Main tree species 1 | | | | | | | | |
| Betula pendula | | | | | 10 | | | | | | | Silver birch | | | | | | | | Main tree species 2 | | | | | | | | |
| Sorbus aucuparia | | | | | 5 | | | | | | | Mountain-ash | | | | | | | | Intermediate tree layer | | | | | | | | |
| Milium effusum | | | | | 10 | | | | | | | Wood millet | | | | | | | | Dominant herb species | | | | | | | | |
| Anemone nemorosa | | | | | 10 | | | | | | | Wood anemone | | | | | | | | Dominant herb species | | | | | | | | |
| Dryopteris filix-mas | | | | | 15 | | | | | | | Male wood fern | | | | | | | | Dominant herb species | | | | | | | | |
| Oxalis acetosella | | | | | 10 | | | | | | | Wood sorrel | | | | | | | | Dominant herb species | | | | | | | | |
| Galium odoratum | | | | | 10 | | | | | | | Sweet woodruff | | | | | | | | Dominant herb species | | | | | | | | |

# **Aspenrulo odorati-Fagetum sylvatici typicum MAYER 1964**

| **Synonym** | | | | | | | **1.Sources of the community relevées** | | | | | | | | | | | | | | | | | | | **No. of relevées** | | | |
| --- | --- | --- | --- | --- | --- | --- | --- | --- | --- | --- | --- | --- | --- | --- | --- | --- | --- | --- | --- | --- | --- | --- | --- | --- | --- | --- | --- | --- | --- |
| **2. EUNIS-Code, mapped EUNIS class** | | | | | | | | | | | | | | | | | | |
| Sweet woodruff-Beech wood (typ. subass.)  Galio odorati-Fagetum typicum Sougnez et Thill 1959 nom. conserv. propos. | | | | | | | 1. Passarge et Hofmann (1968) Table 15a (also Härtle et al. 2004 Table 16/2-13; Schmidt (2002) 1.1.1, Table 2/1/3.1; Oberdorfer (1992) Vol IV, Table 331/2 and Text Vol. p. 212; Willner (2002) Tab 6/9-11, Ellenberg et Klötzli 1972 p. 634; Schmider et Burnand 1988 p. 48; Chytry et al. 2013 tab. 6/5 p.237+245; Niemeyer et al. 2010 p. 57; Hofmann et Pommer 2013 p. 342; Schubert 2001 p. 53)) | | | | | | | | | | | | | | | | | | | 3339 | | | |
| 2. T171, T17-Fagus forest on non-acid soils | | | | | | | | | | | | | | | | | | |
| **Possible climate classes** | | | | | | | | | | | | | | | | | | | | | | | | | | | | | |
| 06 | 07 | 14 | 15 | 16 | | 17 | | 23 | | 24 | 25 | | 26 | | 27 | 31 | 32 | 33 | 34 | | | | 35 | 36 | 37 | | | 41 | 42 |
| 43 | 44 | 45 | 46 | 47 | | 51 | | 52 | | 53 | 54 | | 55 | | 56 | 57 | 60 | 61 | 62 | | | | 63 | 64 | 65 | | | 66 | 67 |
| **Typical site forms according to Benning et al. (2015)** | | | | | | | | | | | | | | | | | | | | | | | | | | | | | |
| **Water budget levels** | | | | | | | | | **Trophy levels** | | | | | | | | | | | **Relief/ Exposition** | | | | | | | | | |
| T1, T2, T3, T4, T5 | | | | | | | | | mo | | | | | | | | | | | Plane, Sunny slope | | | | | | | | | |
| **Typical community parameter ranges** | | | | | | | | | | | | | | | | | | | | | | | | | | | | | |
| **Lower limit (fuzzy)** | | | | | | **Lower limit of optimum** | | | | | | | | **Upper limit of optimum** | | | | | | | | | **Upper limit (fuzzy)** | | | | | | |
| **Base saturation (according to Kappen-Adrian) [%]** | | | | | | | | | | | | | | | | | | | | | | | | | | | | | |
| 16 | | | | | | 19 | | | | | | | | 29 | | | | | | | | | 40 | | | | | | |
| **pHH2O [-]** | | | | | | | | | | | | | | | | | | | | | | | | | | | | | |
| 4 | | | | | | 4.2 | | | | | | | | 5.2 | | | | | | | | | 5.4 | | | | | | |
| **C/N ratio in humus and 10 cm mineral soil layer [%C/%N]** | | | | | | | | | | | | | | | | | | | | | | | | | | | | | |
| 15 | | | | | | 18 | | | | | | | | 28 | | | | | | | | | 31 | | | | | | |
| **Volumetric water content in the rooted soil layer [%]** | | | | | | | | | | | | | | | | | | | | | | | | | | | | | |
| 7 | | | | | | 11 | | | | | | | | 25 | | | | | | | | | 28 | | | | | | |
| **Growing season length [d>10°TMT/a]** | | | | | | | | | | | | | | | | | | | | | | | | | | | | | |
| 115 | | | | | | 128 | | | | | | | | 178 | | | | | | | | | 190 | | | | | | |
| **Climatic water balance per vegetation month [mm/Veg.-Mon.]** | | | | | | | | | | | | | | | | | | | | | | | | | | | | | |
| -22 | | | | | | -7 | | | | | | | | 54 | | | | | | | | | 70 | | | | | | |
| **Solar radiation (PAR) in the growing season [kWh m-2 a-1]** | | | | | | | | | | | | **Lower limit (fuzzy)** | | | | | | | | | | **Upper limit (fuzzy)** | | | | | | | |
| 265 | | | | | | | | | | 813 | | | | | | | |
| **Lowest frost hardiness of all characteristic tree and shrub species (max. average annual low temperature) [°C]** | | | | | | | | | | | | | | | | | | | | | | | | | | | -24 | | |
| **Natural/near-natural combination of species** | | | | | | | | | | | | | | | | | | | | | | | | | | | | | |
| **Species** | | | | | **Areal fraction [%]** | | | | | | | | | **Species (english)** | | | | | | | **Structural element** | | | | | | | | |
| Quercus petraea | | | | | 5 | | | | | | | | | Sessile oak | | | | | | | Secondary tree species | | | | | | | | |
| Fagus sylvatica | | | | | 90 | | | | | | | | | European beech | | | | | | | Main tree species 1 | | | | | | | | |
| Sorbus aucuparia | | | | | 5 | | | | | | | | | Mountain-ash | | | | | | | Intermediate tree layer | | | | | | | | |
| Milium effusum | | | | | 15 | | | | | | | | | Wood millet | | | | | | | Dominant herb species | | | | | | | | |
| Poa nemoralis | | | | | 15 | | | | | | | | | Wood bluegrass | | | | | | | Dominant herb species | | | | | | | | |
| Oxalis acetosella | | | | | 15 | | | | | | | | | Wood sorrel | | | | | | | Dominant herb species | | | | | | | | |
| Anemone nemorosa | | | | | 15 | | | | | | | | | Wood anemone | | | | | | | Dominant herb species | | | | | | | | |
| Galium odoratum | | | | | 15 | | | | | | | | | Sweet woodruff | | | | | | | Dominant herb species | | | | | | | | |

# **Aspenrulo-Abieti-Fagetum sylvatici typicum TH. MÜLLER 1964**

| **Synonym** | | | | | **1.Sources of the community relevées** | | | | | | | | | | | | | | | | | | | | | **No. of relevées** | | | |
| --- | --- | --- | --- | --- | --- | --- | --- | --- | --- | --- | --- | --- | --- | --- | --- | --- | --- | --- | --- | --- | --- | --- | --- | --- | --- | --- | --- | --- | --- |
| **2. EUNIS-Code, mapped EUNIS class** | | | | | | | | | | | | | | | | | | | | |
| Sweet woodruff-  (Fire)Beech wood (typ. subass.) | | | | | 1. Hartmann et Jahn (1967) Tab. IVb/3 (also Willner et Grabherr (2007) Vol 1 p. 153 et Tab. 21a/9) | | | | | | | | | | | | | | | | | | | | | 75 | | | |
| 2. T1713, T17-Fagus forest on non-acid soils | | | | | | | | | | | | | | | | | | | | |
| **Possible climate classes** | | | | | | | | | | | | | | | | | | | | | | | | | | | | | |
| 06 | 07 | 14 | 15 | 16 | | | 17 | 23 | | 24 | 25 | | | 26 | 27 | 31 | 32 | 33 | | 34 | | | 35 | 36 | 37 | | | 41 | 42 |
| 43 | 44 | 45 | 46 | 47 | | | 51 | 52 | | 53 | 54 | | | 55 | 56 | 57 | 60 | 61 | | 62 | | | 63 | 64 | 65 | | | 66 | 67 |
| **Typical site forms according to Benning et al. (2015)** | | | | | | | | | | | | | | | | | | | | | | | | | | | | | |
| **Water budget levels** | | | | | | | | | **Trophy levels** | | | | | | | | | | **Relief/ Exposition** | | | | | | | | | | |
| T1, T2, T3, T4, T5 | | | | | | | | | mo | | | | | | | | | | Plane, Sunny slope | | | | | | | | | | |
| **Typical community parameter ranges** | | | | | | | | | | | | | | | | | | | | | | | | | | | | | |
| **Lower limit (fuzzy)** | | | | | | | **Lower limit of optimum** | | | | | | | | **Upper limit of optimum** | | | | | | | | **Upper limit (fuzzy)** | | | | | | |
| **Base saturation (according to Kappen-Adrian) [%]** | | | | | | | | | | | | | | | | | | | | | | | | | | | | | |
| 19 | | | | | | | 23 | | | | | | | | 38 | | | | | | | | 42 | | | | | | |
| **pHH2O [-]** | | | | | | | | | | | | | | | | | | | | | | | | | | | | | |
| 4.2 | | | | | | | 4.4 | | | | | | | | 5.2 | | | | | | | | 5.4 | | | | | | |
| **C/N ratio in humus and 10 cm mineral soil layer [%C/%N]** | | | | | | | | | | | | | | | | | | | | | | | | | | | | | |
| 15 | | | | | | | 17 | | | | | | | | 24 | | | | | | | | 26 | | | | | | |
| **Volumetric water content in the rooted soil layer [%]** | | | | | | | | | | | | | | | | | | | | | | | | | | | | | |
| 12 | | | | | | | 15 | | | | | | | | 25 | | | | | | | | 28 | | | | | | |
| **Growing season length [d>10°TMT/a]** | | | | | | | | | | | | | | | | | | | | | | | | | | | | | |
| 115 | | | | | | | 122 | | | | | | | | 148 | | | | | | | | 155 | | | | | | |
| **Climatic water balance per vegetation month [mm/Veg.-Mon.]** | | | | | | | | | | | | | | | | | | | | | | | | | | | | | |
| -8 | | | | | | | 3 | | | | | | | | 55 | | | | | | | | 59 | | | | | | |
| **Solar radiation (PAR) in the growing season [kWh m-2 a-1]** | | | | | | | | | | | | | **Lower limit (fuzzy)** | | | | | | | | **Upper limit (fuzzy)** | | | | | | | | |
| 442 | | | | | | | | 534 | | | | | | | | |
| **Lowest frost hardiness of all characteristic tree and shrub species (max. average annual low temperature) [°C]** | | | | | | | | | | | | | | | | | | | | | | | | | | | -24 | | |
| **Natural/near-natural combination of species** | | | | | | | | | | | | | | | | | | | | | | | | | | | | | |
| **Species** | | | | | | **Areal fraction [%]** | | | | | | **Species (english)** | | | | | | | | | | **Structural element** | | | | | | | |
| Fagus sylvatica | | | | | | 40 | | | | | | European beech | | | | | | | | | | Main tree species 1 | | | | | | | |
| Picea abies | | | | | | 10 | | | | | | Norway spruce | | | | | | | | | | Mixed tree species | | | | | | | |
| Abies alba | | | | | | 30 | | | | | | Silver fir | | | | | | | | | | Main tree species 2 | | | | | | | |
| Sorbus aucuparia | | | | | | 5 | | | | | | Mountain-ash | | | | | | | | | | Intermediate tree layer | | | | | | | |
| Acer pseudoplatanus | | | | | | 5 | | | | | | Golden sycamore | | | | | | | | | | Secondary tree species | | | | | | | |
| Prenanthes purpurea | | | | | | 5 | | | | | | Purple lettuce | | | | | | | | | | Dominant herb species | | | | | | | |
| Galium odoratum | | | | | | 5 | | | | | | Sweet woodruff | | | | | | | | | | Dominant herb species | | | | | | | |
| Rubus glandulosis agg. | | | | | | 5 | | | | | | Glandular blackberry | | | | | | | | | | Upper tree/shrub layer | | | | | | | |
| Plagiochila asplenioides | | | | | | 40 | | | | | | Great mussel moss | | | | | | | | | | Dominant moss species | | | | | | | |
| Rhytidiadelphus triquetrus | | | | | | 5 | | | | | | Great rim moss | | | | | | | | | | Dominant moss species | | | | | | | |
| Eurhynchium striatum | | | | | | 5 | | | | | | Acutifoliate beauty nozzle moss | | | | | | | | | | Dominant moss species | | | | | | | |
| Hylocomium splendens | | | | | | 5 | | | | | | Stack moss | | | | | | | | | | Dominant moss species | | | | | | | |
| Thuidium tamariscinum | | | | | | 5 | | | | | | Tamarisk thuja moss | | | | | | | | | | Dominant moss species | | | | | | | |

# **Asplenio onopteris-Quercetum cerridis UBALDI 1995**

| **Synonym** | | | | | | **1.Sources of the community relevées** | | | | | | | | | | | | | | | | | | | **No. of relevées** | | | |
| --- | --- | --- | --- | --- | --- | --- | --- | --- | --- | --- | --- | --- | --- | --- | --- | --- | --- | --- | --- | --- | --- | --- | --- | --- | --- | --- | --- | --- |
| **2. EUNIS-Code, mapped EUNIS class** | | | | | | | | | | | | | | | | | | |
| |  | Irish spleenwort- | | --- | --- |   Turkey oak wood | | | | | | 1. Blasi et al. 2020 Tab. 5/2 (also Pedrotti et al. 1979 Tab. 7) | | | | | | | | | | | | | | | | | | | 16 | | | |
| 2. T1941-Northern Italian Quercus cerris forests | | | | | | | | | | | | | | | | | | |
| **Possible climate classes** | | | | | | | | | | | | | | | | | | | | | | | | | | | | |
| 06 | 07 | 14 | 15 | 16 | | 17 | 23 | | 24 | 25 | | | 26 | 27 | 31 | 32 | 33 | | | 34 | | 35 | 36 | 37 | | | 41 | 42 |
| 43 | 44 | 45 | 46 | 47 | | 51 | 52 | | 53 | 54 | | | 55 | 56 | 57 | 60 | 61 | | | 62 | | 63 | 64 | 65 | | | 66 | 67 |
| **Typical site forms according to Benning et al. (2015)** | | | | | | | | | | | | | | | | | | | | | | | | | | | | |
| **Water budget levels** | | | | | | | | **Trophy levels** | | | | | | | | | | **Relief/ Exposition** | | | | | | | | | | |
| S0, S1, S2, S3, S4 | | | | | | | | mo | | | | | | | | | | Plane, Shady slope, Sunny slope | | | | | | | | | | |
| **Typical community parameter ranges** | | | | | | | | | | | | | | | | | | | | | | | | | | | | |
| **Lower limit (fuzzy)** | | | | | | **Lower limit of optimum** | | | | | | | | **Upper limit of optimum** | | | | | | | | **Upper limit (fuzzy)** | | | | | | |
| **Base saturation (according to Kappen-Adrian) [%]** | | | | | | | | | | | | | | | | | | | | | | | | | | | | |
| 26 | | | | | | 41 | | | | | | | | 85 | | | | | | | | 100 | | | | | | |
| **pHH2O [-]** | | | | | | | | | | | | | | | | | | | | | | | | | | | | |
| 4.8 | | | | | | 5.2 | | | | | | | | 6.6 | | | | | | | | >7 | | | | | | |
| **C/N ratio in humus and 10 cm mineral soil layer [%C/%N]** | | | | | | | | | | | | | | | | | | | | | | | | | | | | |
| 15 | | | | | | 16 | | | | | | | | 21 | | | | | | | | 22 | | | | | | |
| **Volumetric water content in the rooted soil layer [%]** | | | | | | | | | | | | | | | | | | | | | | | | | | | | |
| 8 | | | | | | 10 | | | | | | | | 16 | | | | | | | | 18 | | | | | | |
| **Growing season length [d>10°TMT/a]** | | | | | | | | | | | | | | | | | | | | | | | | | | | | |
| 190 | | | | | | 202 | | | | | | | | 238 | | | | | | | | 250 | | | | | | |
| **Climatic water balance per vegetation month [mm/Veg.-Mon.]** | | | | | | | | | | | | | | | | | | | | | | | | | | | | |
| -17 | | | | | | 0 | | | | | | | | 52 | | | | | | | | 69 | | | | | | |
| **Solar radiation (PAR) in the growing season [kWh m-2 a-1]** | | | | | | | | | | | | **Lower limit (fuzzy)** | | | | | | | | | **Upper limit (fuzzy)** | | | | | | | |
| 784 | | | | | | | | | 963 | | | | | | | |
| **Lowest frost hardiness of all characteristic tree and shrub species (max. average annual low temperature) [°C]** | | | | | | | | | | | | | | | | | | | | | | | | | | -16 | | |
| **Natural/near-natural combination of species** | | | | | | | | | | | | | | | | | | | | | | | | | | | | |
| **Species** | | | | | **Areal fraction [%]** | | | | | | **Species (english)** | | | | | | | | **Structural element** | | | | | | | | | |
| Quercus pubescens | | | | | 5 | | | | | | Downy oak | | | | | | | | Main tree species 2 | | | | | | | | | |
| Quercus cerris | | | | | 75 | | | | | | Turkey oak | | | | | | | | Main tree species 1 | | | | | | | | | |
| Cornus mas | | | | | 2 | | | | | | Cornel cherry | | | | | | | | Intermediate tree layer | | | | | | | | | |
| Sorbus domestica | | | | | 2 | | | | | | Sorb tree | | | | | | | | Intermediate tree layer | | | | | | | | | |
| Viola alba dehnhardtii | | | | | 20 | | | | | | Parma violet | | | | | | | | Dominant herb species | | | | | | | | | |
| Lonicera xylosteum | | | | | 2 | | | | | | Dwarf honeysuckle | | | | | | | | Upper tree/shrub layer | | | | | | | | | |
| Prunus spinosa | | | | | 2 | | | | | | Blackthorn | | | | | | | | Upper tree/shrub layer | | | | | | | | | |
| Juniperus communis | | | | | 2 | | | | | | Common juniper | | | | | | | | Upper tree/shrub layer | | | | | | | | | |
| Crataegus monogyna | | | | | 2 | | | | | | Common hawthorn | | | | | | | | Upper tree/shrub layer | | | | | | | | | |
| Prunus avium | | | | | 2 | | | | | | Wild cherry | | | | | | | | Intermediate tree layer | | | | | | | | | |

# **Athyrio-Alnetum glutinosae TÜXEN 1943**

| **Synonym** | | | | **1.Sources of the community relevées** | | | | | | | | | | | | | | | | | | | | | | **No. of relevées** | | | |
| --- | --- | --- | --- | --- | --- | --- | --- | --- | --- | --- | --- | --- | --- | --- | --- | --- | --- | --- | --- | --- | --- | --- | --- | --- | --- | --- | --- | --- | --- |
| **2. EUNIS-Code, mapped EUNIS class** | | | | | | | | | | | | | | | | | | | | | |
| Lady fern-Black alder forest | | | | 1. Passarge et Hofmann (1968) Tab. 4d (also Schmidt (2002) 11.1.3, Tab. 2/8/4) | | | | | | | | | | | | | | | | | | | | | | 42 | | | |
| 2. T1511 - Meso-eutrophic swamp alder forests | | | | | | | | | | | | | | | | | | | | | |
| **Possible climate classes** | | | | | | | | | | | | | | | | | | | | | | | | | | | | | |
| 06 | 07 | 14 | 15 | | 16 | 17 | | 23 | | 24 | 25 | | 26 | | 27 | 31 | 32 | 33 | | | 34 | | 35 | 36 | 37 | | | 41 | 42 |
| 43 | 44 | 45 | 46 | | 47 | 51 | | 52 | | 53 | 54 | | 55 | | 56 | 57 | 60 | 61 | | | 62 | | 63 | 64 | 65 | | | 66 | 67 |
| **Typical site forms according to Benning et al. (2015)** | | | | | | | | | | | | | | | | | | | | | | | | | | | | | |
| **Water budget levels** | | | | | | | | | **Trophy levels** | | | | | | | | | | **Relief/ Exposition** | | | | | | | | | | |
| G3, G4 | | | | | | | | | m | | | | | | | | | | Plane | | | | | | | | | | |
| **Typical community parameter ranges** | | | | | | | | | | | | | | | | | | | | | | | | | | | | | |
| **Lower limit (fuzzy)** | | | | | | **Lower limit of optimum** | | | | | | | | | **Upper limit of optimum** | | | | | | | | **Upper limit (fuzzy)** | | | | | | |
| **Base saturation (according to Kappen-Adrian) [%]** | | | | | | | | | | | | | | | | | | | | | | | | | | | | | |
| 13 | | | | | | 27 | | | | | | | | | 88 | | | | | | | | 100 | | | | | | |
| **pHH2O [-]** | | | | | | | | | | | | | | | | | | | | | | | | | | | | | |
| 3.8 | | | | | | 4.3 | | | | | | | | | 6.5 | | | | | | | | >7 | | | | | | |
| **C/N ratio in humus and 10 cm mineral soil layer [%C/%N]** | | | | | | | | | | | | | | | | | | | | | | | | | | | | | |
| 8 | | | | | | 12 | | | | | | | | | 28 | | | | | | | | 32 | | | | | | |
| **Volumetric water content in the rooted soil layer [%]** | | | | | | | | | | | | | | | | | | | | | | | | | | | | | |
| 40 | | | | | | 42 | | | | | | | | | 48 | | | | | | | | 50 | | | | | | |
| **Growing season length [d>10°TMT/a]** | | | | | | | | | | | | | | | | | | | | | | | | | | | | | |
| 115 | | | | | | 133 | | | | | | | | | 203 | | | | | | | | 220 | | | | | | |
| **Climatic water balance per vegetation month [mm/Veg.-Mon.]** | | | | | | | | | | | | | | | | | | | | | | | | | | | | | |
| -46 | | | | | | -42 | | | | | | | | | 55 | | | | | | | | 70 | | | | | | |
| **Solar radiation (PAR) in the growing season [kWh m-2 a-1]** | | | | | | | | | | | | **Lower limit (fuzzy)** | | | | | | | | | | **Upper limit (fuzzy)** | | | | | | | |
| 325 | | | | | | | | | | 709 | | | | | | | |
| **Lowest frost hardiness of all characteristic tree and shrub species (max. average annual low temperature) [°C]** | | | | | | | | | | | | | | | | | | | | | | | | | | | -28 | | |
| **Natural/near-natural combination of species** | | | | | | | | | | | | | | | | | | | | | | | | | | | | | |
| **Species** | | | | | | | **Areal fraction [%]** | | | | | | | **Species (english)** | | | | | | **Structural element** | | | | | | | | | |
| Fraxinus excelsior | | | | | | | 2 | | | | | | | Common ash | | | | | | Secondary tree species | | | | | | | | | |
| Alnus glutinosa | | | | | | | 75 | | | | | | | Common alder | | | | | | Main tree species 1 | | | | | | | | | |
| Phalaris arundinacea | | | | | | | 5 | | | | | | | Reed canary grass | | | | | | Dominant herb species | | | | | | | | | |
| Carex elongata | | | | | | | 5 | | | | | | | Elongated sedge | | | | | | Dominant herb species | | | | | | | | | |
| Calamagrostis canescens | | | | | | | 10 | | | | | | | Purple small-reed | | | | | | Dominant herb species | | | | | | | | | |
| Dryopteris dilatata | | | | | | | 5 | | | | | | | Broad buckler fern | | | | | | Dominant herb species | | | | | | | | | |
| Filipendula ulmaria | | | | | | | 5 | | | | | | | Meadowsweet | | | | | | Dominant herb species | | | | | | | | | |
| Athyrium filix-femina | | | | | | | 25 | | | | | | | Common lady-fern | | | | | | Dominant herb species | | | | | | | | | |
| Oxalis acetosella | | | | | | | 25 | | | | | | | Wood sorrel | | | | | | Dominant herb species | | | | | | | | | |
| Pteridium aquilinum | | | | | | | 5 | | | | | | | Bracken | | | | | | Dominant herb species | | | | | | | | | |
| Sphagnum squarrosum | | | | | | | 5 | | | | | | | Squarrose peat moss | | | | | | Dominant moss species | | | | | | | | | |
| Rubus idaeus | | | | | | | 5 | | | | | | | Raspberry | | | | | | Upper tree/shrub layer | | | | | | | | | |

# **Bazzanio-Piceetum (SCHMIDT et GAISBERG 1936) BRAUN-BLANQUET 1939**

| **Synonym** | | | | | **1.Sources of the community relevées** | | | | | | | | | | | | | | | | | | | | **No. of relevées** | | | |
| --- | --- | --- | --- | --- | --- | --- | --- | --- | --- | --- | --- | --- | --- | --- | --- | --- | --- | --- | --- | --- | --- | --- | --- | --- | --- | --- | --- | --- |
| **2. EUNIS-Code, mapped EUNIS class** | | | | | | | | | | | | | | | | | | | |
| Whip moss-Norway spruce Wood  Mastigobryo-Piceetum Br.-BI. 1939 | | | | | 1. Oberdorfer (1992) Vol IV, Table 269/10Ab and Text Vol. p. 69 (also in Hartmann et Jahn 1967 Table II/50-51 and p. 387; Willner et Grabherr (2007) Teil 1 p. 206 et Table 39/6; Ellenberg et Klötzli 1972 p.712 with Keller et al. 1998; Schmider et Burnand 1988 p. 142; Schubert 2001 p. 90) | | | | | | | | | | | | | | | | | | | | 355 | | | |
| 2. T312, T31-Temporary montane Norway spruce (Picea abies) forest | | | | | | | | | | | | | | | | | | | |
| **Possible climate classes** | | | | | | | | | | | | | | | | | | | | | | | | | | | | |
| 06 | 07 | 14 | 15 | 16 | 17 | | 23 | | 24 | 25 | | | 26 | 27 | 31 | 32 | 33 | | | 34 | | 35 | 36 | 37 | | | 41 | 42 |
| 43 | 44 | 45 | 46 | 47 | 51 | | 52 | | 53 | 54 | | | 55 | 56 | 57 | 60 | 61 | | | 62 | | 63 | 64 | 65 | | | 66 | 67 |
| **Typical site forms according to Benning et al. (2015)** | | | | | | | | | | | | | | | | | | | | | | | | | | | | |
| **Water budget levels** | | | | | | | | **Trophy levels** | | | | | | | | | | | **Relief/ Exposition** | | | | | | | | | |
| G3, S4 | | | | | | | | m | | | | | | | | | | | Plane, Shady slope, Sunny slope | | | | | | | | | |
| **Typical community parameter ranges** | | | | | | | | | | | | | | | | | | | | | | | | | | | | |
| **Lower limit (fuzzy)** | | | | | **Lower limit of optimum** | | | | | | | | | **Upper limit of optimum** | | | | | | | | **Upper limit (fuzzy)** | | | | | | |
| **Base saturation (according to Kappen-Adrian) [%]** | | | | | | | | | | | | | | | | | | | | | | | | | | | | |
| 6 | | | | | 9 | | | | | | | | | 21 | | | | | | | | 24 | | | | | | |
| **pHH2O [-]** | | | | | | | | | | | | | | | | | | | | | | | | | | | | |
| 3.3 | | | | | 3.5 | | | | | | | | | 4.4 | | | | | | | | 4.6 | | | | | | |
| **C/N ratio in humus and 10 cm mineral soil layer [%C/%N]** | | | | | | | | | | | | | | | | | | | | | | | | | | | | |
| 22 | | | | | 24 | | | | | | | | | 31 | | | | | | | | 33 | | | | | | |
| **Volumetric water content in the rooted soil layer [%]** | | | | | | | | | | | | | | | | | | | | | | | | | | | | |
| 16 | | | | | 32 | | | | | | | | | 58 | | | | | | | | 60 | | | | | | |
| **Growing season length [d>10°TMT/a]** | | | | | | | | | | | | | | | | | | | | | | | | | | | | |
| 110 | | | | | 117 | | | | | | | | | 143 | | | | | | | | 150 | | | | | | |
| **Climatic water balance per vegetation month [mm/Veg.-Mon.]** | | | | | | | | | | | | | | | | | | | | | | | | | | | | |
| -12 | | | | | 10 | | | | | | | | | 96 | | | | | | | | 117 | | | | | | |
| **Solar radiation (PAR) in the growing season [kWh m-2 a-1]** | | | | | | | | | | | **Lower limit (fuzzy)** | | | | | | | | | | **Upper limit (fuzzy)** | | | | | | | |
| 404 | | | | | | | | | | 563 | | | | | | | |
| **Lowest frost hardiness of all characteristic tree and shrub species (max. average annual low temperature) [°C]** | | | | | | | | | | | | | | | | | | | | | | | | | | -26 | | |
| **Natural/near-natural combination of species** | | | | | | | | | | | | | | | | | | | | | | | | | | | | |
| **Species** | | | | | | **Areal fraction [%]** | | | | | | **Species (english)** | | | | | | **Structural element** | | | | | | | | | | |
| Betula pendula | | | | | | 10 | | | | | | Silver birch | | | | | | Mixed tree species | | | | | | | | | | |
| Abies alba | | | | | | 1 | | | | | | Silver fir | | | | | | Secondary tree species | | | | | | | | | | |
| Betula pubescens carpatica | | | | | | 10 | | | | | | Carpathian birch | | | | | | Main tree species 2 | | | | | | | | | | |
| Picea abies | | | | | | 75 | | | | | | Norway spruce | | | | | | Main tree species 1 | | | | | | | | | | |
| Sorbus aucuparia | | | | | | 5 | | | | | | Mountain-ash | | | | | | Intermediate tree layer | | | | | | | | | | |
| Deschampsia cespitosa | | | | | | 20 | | | | | | Tussock hairgrass | | | | | | Dominant herb species | | | | | | | | | | |
| Juncus effusus | | | | | | 20 | | | | | | Soft rush | | | | | | Dominant herb species | | | | | | | | | | |
| Dryopteris dilatata | | | | | | 20 | | | | | | Broad wood fern | | | | | | Dominant herb species | | | | | | | | | | |
| Dicranum scoparium | | | | | | 5 | | | | | | Common fork moss | | | | | | Dominant moss species | | | | | | | | | | |
| Bazzania trilobata | | | | | | 25 | | | | | | Trilobate whip moss | | | | | | Dominant moss species | | | | | | | | | | |

# **Betulo-Quercetum petraeae typicum (GAUME 1924) TÜXEN 1937**

| **Synonym** | | | | **1.Sources of the community relevées** | | | | | | | | | | | | | | | | | | | | **No. of relevées** | | | | |
| --- | --- | --- | --- | --- | --- | --- | --- | --- | --- | --- | --- | --- | --- | --- | --- | --- | --- | --- | --- | --- | --- | --- | --- | --- | --- | --- | --- | --- |
| **2. EUNIS-Code, mapped EUNIS class** | | | | | | | | | | | | | | | | | | | |
| Birch-Sessile oak-beech forest | | | | 1. Oberdorfer (1992) Vol IV, Table 291/2b1 and Text Vol. p. 111 (also Tüxen (1937) p. 129; Niemeyer et al. 2010 p. 87) | | | | | | | | | | | | | | | | | | | | 1815 | | | | |
| 2. T1B1, T1B - Acidophilous Quercus forest | | | | | | | | | | | | | | | | | | | |
| **Possible climate classes** | | | | | | | | | | | | | | | | | | | | | | | | | | | | |
| 06 | 07 | 14 | 15 | | 16 | | 17 | | 23 | 24 | 25 | | | 26 | 27 | 31 | 32 | 33 | | 34 | | 35 | 36 | | | 37 | 41 | 42 |
| 43 | 44 | 45 | 46 | | 47 | | 51 | | 52 | 53 | 54 | | | 55 | 56 | 57 | 60 | 61 | | 62 | | 63 | 64 | | | 65 | 66 | 67 |
| **Typical site forms according to Benning et al. (2015)** | | | | | | | | | | | | | | | | | | | | | | | | | | | | |
| **Water budget levels** | | | | | | | | **Trophy levels** | | | | | | | | | | | **Relief/ Exposition** | | | | | | | | | |
| T3, T4, T5 | | | | | | | | o | | | | | | | | | | | Plane, Shady slope | | | | | | | | | |
| **Typical community parameter ranges** | | | | | | | | | | | | | | | | | | | | | | | | | | | | |
| **Lower limit (fuzzy)** | | | | | | | **Lower limit of optimum** | | | | | | | | **Upper limit of optimum** | | | | | | | **Upper limit (fuzzy)** | | | | | | |
| **Base saturation (according to Kappen-Adrian) [%]** | | | | | | | | | | | | | | | | | | | | | | | | | | | | |
| 5 | | | | | | | 10 | | | | | | | | 22 | | | | | | | 25 | | | | | | |
| **pHH2O [-]** | | | | | | | | | | | | | | | | | | | | | | | | | | | | |
| 3.2 | | | | | | | 3.8 | | | | | | | | 4.5 | | | | | | | 4.7 | | | | | | |
| **C/N ratio in humus and 10 cm mineral soil layer [%C/%N]** | | | | | | | | | | | | | | | | | | | | | | | | | | | | |
| 18 | | | | | | | 19 | | | | | | | | 29 | | | | | | | 31 | | | | | | |
| **Volumetric water content in the rooted soil layer [%]** | | | | | | | | | | | | | | | | | | | | | | | | | | | | |
| 7 | | | | | | | 8 | | | | | | | | 18 | | | | | | | 19 | | | | | | |
| **Growing season length [d>10°TMT/a]** | | | | | | | | | | | | | | | | | | | | | | | | | | | | |
| 140 | | | | | | | 145 | | | | | | | | 189 | | | | | | | 210 | | | | | | |
| **Climatic water balance per vegetation month [mm/Veg.-Mon.]** | | | | | | | | | | | | | | | | | | | | | | | | | | | | |
| -12 | | | | | | | -8 | | | | | | | | 60 | | | | | | | 70 | | | | | | |
| **Solar radiation (PAR) in the growing season [kWh m-2 a-1]** | | | | | | | | | | | | | **Lower limit (fuzzy)** | | | | | | | | **Upper limit (fuzzy)** | | | | | | | |
| 400 | | | | | | | | 747 | | | | | | | |
| **Lowest frost hardiness of all characteristic tree and shrub species (max. average annual low temperature) [°C]** | | | | | | | | | | | | | | | | | | | | | | | | | -24 | | | |
| **Natural/near-natural combination of species** | | | | | | | | | | | | | | | | | | | | | | | | | | | | |
| **Species** | | | | | | **Areal fraction [%]** | | | | | | **Species (english)** | | | | | | | **Structural element** | | | | | | | | | |
| Quercus petraea | | | | | | 20 | | | | | | Sessile oak | | | | | | | Main tree species 2 | | | | | | | | | |
| Quercus robur | | | | | | 40 | | | | | | Pedunculate oak | | | | | | | Main tree species 1 | | | | | | | | | |
| Betula pendula | | | | | | 5 | | | | | | Silver birch | | | | | | | Mixed tree species | | | | | | | | | |
| Pinus sylvestris | | | | | | 5 | | | | | | Scotch pine | | | | | | | Secondary tree species | | | | | | | | | |
| Fagus sylvatica | | | | | | 5 | | | | | | European beech | | | | | | | Secondary tree species | | | | | | | | | |
| Luzula luzuloides | | | | | | 30 | | | | | | Snow-white woodrush | | | | | | | Dominant herb species | | | | | | | | | |
| Avenella flexuosa | | | | | | 30 | | | | | | Wavy hairgrass | | | | | | | Dominant herb species | | | | | | | | | |
| Calluna vulgaris | | | | | | 2 | | | | | | Scotch heather | | | | | | | Dominant herb species | | | | | | | | | |
| Dicranum scoparium | | | | | | 5 | | | | | | Common fork moss | | | | | | | Dominant moss species | | | | | | | | | |
| Polytrichum formosum | | | | | | 5 | | | | | | Beauty haircap moss | | | | | | | Dominant moss species | | | | | | | | | |
| Hypnum cupressiforme | | | | | | 5 | | | | | | Cypress dormant moss | | | | | | | Dominant moss species | | | | | | | | | |

# **Bromo-Carpinetum betuli dryopteridetosum HOFMANN 1968**

| **Synonym** | | | | | **1.Sources of the community relevées** | | | | | | | | | | | | | | | | | | | | | | | | **No. of relevées** | | | |
| --- | --- | --- | --- | --- | --- | --- | --- | --- | --- | --- | --- | --- | --- | --- | --- | --- | --- | --- | --- | --- | --- | --- | --- | --- | --- | --- | --- | --- | --- | --- | --- | --- |
| **2. EUNIS-Code, mapped EUNIS class** | | | | | | | | | | | | | | | | | | | | | | | |
| Brome-Hornbeam forest (worm fern subass.) | | | | | 1. Passarge et Hofmann (1968) Tab. 21f | | | | | | | | | | | | | | | | | | | | | | | | 14 | | | |
| 2. T1E16 - Sub-continental Quercus - Carpinus betulus forests | | | | | | | | | | | | | | | | | | | | | | | |
| **Possible climate classes** | | | | | | | | | | | | | | | | | | | | | | | | | | | | | | | | |
| 06 | 07 | 14 | 15 | 16 | | | 17 | | 23 | | 24 | 25 | | | 26 | | 27 | 31 | 32 | 33 | | | 34 | | | 35 | 36 | 37 | | | 41 | 42 |
| 43 | 44 | 45 | 46 | 47 | | | 51 | | 52 | | 53 | 54 | | | 55 | | 56 | 57 | 60 | 61 | | | 62 | | | 63 | 64 | 65 | | | 66 | 67 |
| **Typical site forms according to Benning et al. (2015)** | | | | | | | | | | | | | | | | | | | | | | | | | | | | | | | | |
| **Water budget levels** | | | | | | | | | | **Trophy levels** | | | | | | | | | | | | **Relief/ Exposition** | | | | | | | | | | |
| T1, T2, T3, T4, T5 | | | | | | | | | | e, mo | | | | | | | | | | | | Shady slope | | | | | | | | | | |
| **Typical community parameter ranges** | | | | | | | | | | | | | | | | | | | | | | | | | | | | | | | | |
| **Lower limit (fuzzy)** | | | | | | **Lower limit of optimum** | | | | | | | | | | **Upper limit of optimum** | | | | | | | | | **Upper limit (fuzzy)** | | | | | | | |
| **Base saturation (according to Kappen-Adrian) [%]** | | | | | | | | | | | | | | | | | | | | | | | | | | | | | | | | |
| 23 | | | | | | | 33 | | | | | | | | | | 75 | | | | | | | | | 85 | | | | | | |
| **pHH2O [-]** | | | | | | | | | | | | | | | | | | | | | | | | | | | | | | | | |
| 4.5 | | | | | | | 4.7 | | | | | | | | | | 5.3 | | | | | | | | | 5.4 | | | | | | |
| **C/N ratio in humus and 10 cm mineral soil layer [%C/%N]** | | | | | | | | | | | | | | | | | | | | | | | | | | | | | | | | |
| 15 | | | | | | | 17 | | | | | | | | | | 24 | | | | | | | | | 26 | | | | | | |
| **Volumetric water content in the rooted soil layer [%]** | | | | | | | | | | | | | | | | | | | | | | | | | | | | | | | | |
| 8 | | | | | | | 11 | | | | | | | | | | 24 | | | | | | | | | 27 | | | | | | |
| **Growing season length [d>10°TMT/a]** | | | | | | | | | | | | | | | | | | | | | | | | | | | | | | | | |
| 140 | | | | | | | 153 | | | | | | | | | | 207 | | | | | | | | | 220 | | | | | | |
| **Climatic water balance per vegetation month [mm/Veg.-Mon.]** | | | | | | | | | | | | | | | | | | | | | | | | | | | | | | | | |
| -46 | | | | | | | -38 | | | | | | | | | | -7 | | | | | | | | | 1 | | | | | | |
| **Solar radiation (PAR) in the growing season [kWh m-2 a-1]** | | | | | | | | | | | | | **Lower limit (fuzzy)** | | | | | | | | | | | **Upper limit (fuzzy)** | | | | | | | | |
| 394 | | | | | | | | | | | 502 | | | | | | | | |
| **Lowest frost hardiness of all characteristic tree and shrub species (max. average annual low temperature) [°C]** | | | | | | | | | | | | | | | | | | | | | | | | | | | | | | -20 | | |
| **Natural/near-natural combination of species** | | | | | | | | | | | | | | | | | | | | | | | | | | | | | | | | |
| **Species** | | | | | | | | **Areal fraction [%]** | | | | | | **Species (english)** | | | | | | | **Structural element** | | | | | | | | | | | |
| Fraxinus excelsior | | | | | | | | 5 | | | | | | Common ash | | | | | | | Mixed tree species | | | | | | | | | | | |
| Carpinus betulus | | | | | | | | 50 | | | | | | European hornbeam | | | | | | | Main tree species 1 | | | | | | | | | | | |
| Quercus robur | | | | | | | | 5 | | | | | | Pedunculate oak | | | | | | | Secondary tree species | | | | | | | | | | | |
| Tilia cordata | | | | | | | | 20 | | | | | | Small-leaved lime | | | | | | | Main tree species 2 | | | | | | | | | | | |
| Brachypodium sylvaticum | | | | | | | | 10 | | | | | | False brome | | | | | | | Dominant herb species | | | | | | | | | | | |
| Oxalis acetosella | | | | | | | | 20 | | | | | | Wood sorrel | | | | | | | Dominant herb species | | | | | | | | | | | |
| Dryopteris filix-mas | | | | | | | | 30 | | | | | | Male wood fern | | | | | | | Dominant herb species | | | | | | | | | | | |
| Galium odoratum | | | | | | | | 25 | | | | | | Sweet woodruff | | | | | | | Dominant herb species | | | | | | | | | | | |
| Euonymus europaea | | | | | | | | 5 | | | | | | European spindle tree | | | | | | | Upper tree/shrub layer | | | | | | | | | | | |
| Rhamnus cathartica | | | | | | | | 10 | | | | | | European buckthorn | | | | | | | Upper tree/shrub layer | | | | | | | | | | | |

# **Bromo-Carpinetum betuli typicum HOFMANN 1968**

| **Synonym** | | | | | **1.Sources of the community relevées** | | | | | | | | | | | | | | | | | | | | | **No. of relevées** | | | |
| --- | --- | --- | --- | --- | --- | --- | --- | --- | --- | --- | --- | --- | --- | --- | --- | --- | --- | --- | --- | --- | --- | --- | --- | --- | --- | --- | --- | --- | --- |
| **2. EUNIS-Code, mapped EUNIS class** | | | | | | | | | | | | | | | | | | | | |
| Brome-Hornbeam forest (typ. subass.) | | | | | 1. Passarge et Hofmann (1968) Tab. 21g, h | | | | | | | | | | | | | | | | | | | | | 14 | | | |
| 2. T1E16 - Sub-continental Quercus - Carpinus betulus forests | | | | | | | | | | | | | | | | | | | | |
| **Possible climate classes** | | | | | | | | | | | | | | | | | | | | | | | | | | | | | |
| 06 | 07 | 14 | 15 | 16 | | 17 | | 23 | | 24 | 25 | | | 26 | 27 | 31 | 32 | 33 | | | 34 | | 35 | 36 | 37 | | | 41 | 42 |
| 43 | 44 | 45 | 46 | 47 | | 51 | | 52 | | 53 | 54 | | | 55 | 56 | 57 | 60 | 61 | | | 62 | | 63 | 64 | 65 | | | 66 | 67 |
| **Typical site forms according to Benning et al. (2015)** | | | | | | | | | | | | | | | | | | | | | | | | | | | | | |
| **Water budget levels** | | | | | | | | | **Trophy levels** | | | | | | | | | | | **Relief/ Exposition** | | | | | | | | | |
| T3, T4, T5 | | | | | | | | | e, mo | | | | | | | | | | | Plane, Sunny slope | | | | | | | | | |
| **Typical community parameter ranges** | | | | | | | | | | | | | | | | | | | | | | | | | | | | | |
| **Lower limit (fuzzy)** | | | | | | **Lower limit of optimum** | | | | | | | | | **Upper limit of optimum** | | | | | | | | **Upper limit (fuzzy)** | | | | | | |
| **Base saturation (according to Kappen-Adrian) [%]** | | | | | | | | | | | | | | | | | | | | | | | | | | | | | |
| 23 | | | | | | 35 | | | | | | | | | 73 | | | | | | | | 85 | | | | | | |
| **pHH2O [-]** | | | | | | | | | | | | | | | | | | | | | | | | | | | | | |
| 4.5 | | | | | | 4.7 | | | | | | | | | 5.2 | | | | | | | | 5.4 | | | | | | |
| **C/N ratio in humus and 10 cm mineral soil layer [%C/%N]** | | | | | | | | | | | | | | | | | | | | | | | | | | | | | |
| 15 | | | | | | 17 | | | | | | | | | 24 | | | | | | | | 26 | | | | | | |
| **Volumetric water content in the rooted soil layer [%]** | | | | | | | | | | | | | | | | | | | | | | | | | | | | | |
| 12 | | | | | | 15 | | | | | | | | | 25 | | | | | | | | 28 | | | | | | |
| **Growing season length [d>10°TMT/a]** | | | | | | | | | | | | | | | | | | | | | | | | | | | | | |
| 115 | | | | | | 136 | | | | | | | | | 199 | | | | | | | | 220 | | | | | | |
| **Climatic water balance per vegetation month [mm/Veg.-Mon.]** | | | | | | | | | | | | | | | | | | | | | | | | | | | | | |
| -46 | | | | | | -25 | | | | | | | | | 38 | | | | | | | | 59 | | | | | | |
| **Solar radiation (PAR) in the growing season [kWh m-2 a-1]** | | | | | | | | | | | | **Lower limit (fuzzy)** | | | | | | | | | | **Upper limit (fuzzy)** | | | | | | | |
| 347 | | | | | | | | | | 630 | | | | | | | |
| **Lowest frost hardiness of all characteristic tree and shrub species (max. average annual low temperature) [°C]** | | | | | | | | | | | | | | | | | | | | | | | | | | | -20 | | |
| **Natural/near-natural combination of species** | | | | | | | | | | | | | | | | | | | | | | | | | | | | | |
| **Species** | | | | | | | **Areal fraction [%]** | | | | | | **Species (english)** | | | | | | **Structural element** | | | | | | | | | | |
| Fraxinus excelsior | | | | | | | 5 | | | | | | Common ash | | | | | | Secondary tree species | | | | | | | | | | |
| Carpinus betulus | | | | | | | 40 | | | | | | European hornbeam | | | | | | Main tree species 1 | | | | | | | | | | |
| Quercus robur | | | | | | | 5 | | | | | | Pedunculate oak | | | | | | Mixed tree species | | | | | | | | | | |
| Tilia cordata | | | | | | | 30 | | | | | | Small-leaved lime | | | | | | Main tree species 2 | | | | | | | | | | |
| Melica nutans | | | | | | | 10 | | | | | | Melic grass | | | | | | Dominant herb species | | | | | | | | | | |
| Brachypodium sylvaticum | | | | | | | 10 | | | | | | False brome | | | | | | Dominant herb species | | | | | | | | | | |
| Dactylis glomerata | | | | | | | 10 | | | | | | Cocksfoot | | | | | | Dominant herb species | | | | | | | | | | |
| Poa nemoralis | | | | | | | 10 | | | | | | Wood bluegrass | | | | | | Dominant herb species | | | | | | | | | | |
| Impatiens noli-tangere | | | | | | | 40 | | | | | | Touch-me-not balsam | | | | | | Dominant herb species | | | | | | | | | | |
| Galium odoratum | | | | | | | 60 | | | | | | Sweet woodruff | | | | | | Dominant herb species | | | | | | | | | | |
| Euonymus europaea | | | | | | | 10 | | | | | | European spindle tree | | | | | | Upper tree/shrub layer | | | | | | | | | | |
| Rhamnus cathartica | | | | | | | 25 | | | | | | European buckthorn | | | | | | Upper tree/shrub layer | | | | | | | | | | |
| Crataegus monogyna | | | | | | | 25 | | | | | | Common hawthorn | | | | | | Intermediate tree layer | | | | | | | | | | |

# **Buxo-Quercetum pubescentis BRAUN-BLANQUET 1932**

| **Synonym** | | | | | | **1.Sources of the community relevées** | | | | | | | | | | | | | | | | | | | | **No. of relevées** | | | |
| --- | --- | --- | --- | --- | --- | --- | --- | --- | --- | --- | --- | --- | --- | --- | --- | --- | --- | --- | --- | --- | --- | --- | --- | --- | --- | --- | --- | --- | --- |
| **2. EUNIS-Code, mapped EUNIS class** | | | | | | | | | | | | | | | | | | | |
| Box tree - Downy oak forest,  Aceri monspessulani-Quercetum petraeae corydalietosum OBERD. 1957 | | | | | | 1. Hartmann et Jahn (1967) Tab. XII/30 (also: Loidi et Herrera 1990 Tab. 3/8-11) | | | | | | | | | | | | | | | | | | | | 54 | | | |
| 2. T193 - Eastern Quercus pubescens forests | | | | | | | | | | | | | | | | | | | |
| **Possible climate classes** | | | | | | | | | | | | | | | | | | | | | | | | | | | | | |
| 06 | 07 | 14 | 15 | 16 | 17 | | | 23 | | 24 | 25 | | 26 | | 27 | 31 | 32 | 33 | | 34 | | | 35 | 36 | 37 | | | 41 | 42 |
| 43 | 44 | 45 | 46 | 47 | 51 | | | 52 | | 53 | 54 | | 55 | | 56 | 57 | 60 | 61 | | 62 | | | 63 | 64 | 65 | | | 66 | 67 |
| **Typical site forms according to Benning et al. (2015)** | | | | | | | | | | | | | | | | | | | | | | | | | | | | | |
| **Water budget levels** | | | | | | | | | **Trophy levels** | | | | | | | | | | **Relief/ Exposition** | | | | | | | | | | |
| T1, T2, T3, T4, T5 | | | | | | | | | mo | | | | | | | | | | Plane, Shady slope, Sunny slope | | | | | | | | | | |
| **Typical community parameter ranges** | | | | | | | | | | | | | | | | | | | | | | | | | | | | | |
| **Lower limit (fuzzy)** | | | | | **Lower limit of optimum** | | | | | | | | | | **Upper limit of optimum** | | | | | | | | **Upper limit (fuzzy)** | | | | | | |
| **Base saturation (according to Kappen-Adrian) [%]** | | | | | | | | | | | | | | | | | | | | | | | | | | | | | |
| 35 | | | | | 43 | | | | | | | | | | 88 | | | | | | | | 100 | | | | | | |
| **pHH2O [-]** | | | | | | | | | | | | | | | | | | | | | | | | | | | | | |
| 5.7 | | | | | 5.9 | | | | | | | | | | 6.7 | | | | | | | | >7 | | | | | | |
| **C/N ratio in humus and 10 cm mineral soil layer [%C/%N]** | | | | | | | | | | | | | | | | | | | | | | | | | | | | | |
| 15 | | | | | 16 | | | | | | | | | | 21 | | | | | | | | 22 | | | | | | |
| **Volumetric water content in the rooted soil layer [%]** | | | | | | | | | | | | | | | | | | | | | | | | | | | | | |
| 6 | | | | | 9 | | | | | | | | | | 20 | | | | | | | | 23 | | | | | | |
| **Growing season length [d>10°TMT/a]** | | | | | | | | | | | | | | | | | | | | | | | | | | | | | |
| 170 | | | | | 178 | | | | | | | | | | 212 | | | | | | | | 220 | | | | | | |
| **Climatic water balance per vegetation month [mm/Veg.-Mon.]** | | | | | | | | | | | | | | | | | | | | | | | | | | | | | |
| -27 | | | | | -22 | | | | | | | | | | 25 | | | | | | | | 35 | | | | | | |
| **Solar radiation (PAR) in the growing season [kWh m-2 a-1]** | | | | | | | | | | | | **Lower limit (fuzzy)** | | | | | | | | | **Upper limit (fuzzy)** | | | | | | | | |
| 578 | | | | | | | | | 951 | | | | | | | | |
| **Lowest frost hardiness of all characteristic tree and shrub species (max. average annual low temperature) [°C]** | | | | | | | | | | | | | | | | | | | | | | | | | | | -18 | | |
| **Natural/near-natural combination of species** | | | | | | | | | | | | | | | | | | | | | | | | | | | | | |
| **Species** | | | | | | | **Areal fraction [%]** | | | | | | | **Species (english)** | | | | | | | | **Structural element** | | | | | | | |
| Acer monspessulanum | | | | | | | 10 | | | | | | | Montpellier maple | | | | | | | | Mixed tree species | | | | | | | |
| Quercus pubescens | | | | | | | 30 | | | | | | | Downy oak | | | | | | | | Main tree species 1 | | | | | | | |
| Quercus petraea | | | | | | | 10 | | | | | | | Sessile oak | | | | | | | | Main tree species 2 | | | | | | | |
| Sorbus torminalis | | | | | | | 5 | | | | | | | Service tree | | | | | | | | Intermediate tree layer | | | | | | | |
| Sorbus aria | | | | | | | 5 | | | | | | | Common whitebeam | | | | | | | | Intermediate tree layer | | | | | | | |
| Prunus mahaleb | | | | | | | 5 | | | | | | | Mahaleb cherry | | | | | | | | Intermediate tree layer | | | | | | | |
| Hedera helix | | | | | | | 2 | | | | | | | English ivy | | | | | | | | Upper tree/shrub layer | | | | | | | |
| Amelanchier ovalis | | | | | | | 2 | | | | | | | Snowy mespilus | | | | | | | | Upper tree/shrub layer | | | | | | | |
| Laserpitium nestleri | | | | | | | 2 | | | | | | | Nestler´s laserwort | | | | | | | | Dominant herb species | | | | | | | |
| Mannia triandra | | | | | | | 5 | | | | | | | Three-man dwarf lung moss | | | | | | | | Dominant moss species | | | | | | | |
| Rosa canina | | | | | | | 5 | | | | | | | Dog rose | | | | | | | | Upper tree/shrub layer | | | | | | | |
| Euonymus latifolia | | | | | | | 2 | | | | | | | Large-leaved spindle | | | | | | | | Upper tree/shrub layer | | | | | | | |
| Ligustrum vulgare | | | | | | | 5 | | | | | | | European privet | | | | | | | | Upper tree/shrub layer | | | | | | | |
| Crataegus laevigata | | | | | | | 5 | | | | | | | Midland hawthorn | | | | | | | | Upper tree/shrub layer | | | | | | | |
| Cotoneaster intermedia | | | | | | | 2 | | | | | | | Cotoneaster | | | | | | | | Upper tree/shrub layer | | | | | | | |
| Prunus spinosa | | | | | | | 5 | | | | | | | Blackthorn | | | | | | | | Upper tree/shrub layer | | | | | | | |
| Buxus sempervirens | | | | | | | 20 | | | | | | | Box tree | | | | | | | | Upper tree/shrub layer | | | | | | | |

# **Calamagrostio variae-Piceetum SCHWEINGRUBER 1972**

| **Synonym** | | | | **1.Sources of the community relevées** | | | | | | | | | | | | | | | | | | | | | | **No. of relevées** | | | |
| --- | --- | --- | --- | --- | --- | --- | --- | --- | --- | --- | --- | --- | --- | --- | --- | --- | --- | --- | --- | --- | --- | --- | --- | --- | --- | --- | --- | --- | --- |
| **2. EUNIS-Code, mapped EUNIS class** | | | | | | | | | | | | | | | | | | | | | |
| Bunchgrass-Spruce forest | | | | 1. Mucina et al. (1993) Vol III, p. 319 (also Willner et Grabherr (2007) Teil I p. 89 et Table 33/4-5; Schmider et Burnand 1988 p. 147) | | | | | | | | | | | | | | | | | | | | | | 243 | | | |
| 2. T313, T31-Temporary montane Norway spruce (Picea abies) forest | | | | | | | | | | | | | | | | | | | | | |
| **Possible climate classes** | | | | | | | | | | | | | | | | | | | | | | | | | | | | | |
| 06 | 07 | 14 | 15 | | 16 | | 17 | 23 | | 24 | 25 | | | 26 | 27 | 31 | 32 | 33 | | | 34 | | 35 | 36 | 37 | | | 41 | 42 |
| 43 | 44 | 45 | 46 | | 47 | | 51 | 52 | | 53 | 54 | | | 55 | 56 | 57 | 60 | 61 | | | 62 | | 63 | 64 | 65 | | | 66 | 67 |
| **Typical site forms according to Benning et al. (2015)** | | | | | | | | | | | | | | | | | | | | | | | | | | | | | |
| **Water budget levels** | | | | | | | | | **Trophy levels** | | | | | | | | | | **Relief/ Exposition** | | | | | | | | | | |
| T3, T4, T5, S1 | | | | | | | | | e | | | | | | | | | | Sunny slope | | | | | | | | | | |
| **Typical community parameter ranges** | | | | | | | | | | | | | | | | | | | | | | | | | | | | | |
| **Lower limit (fuzzy)** | | | | | | | **Lower limit of optimum** | | | | | | | | **Upper limit of optimum** | | | | | | | | **Upper limit (fuzzy)** | | | | | | |
| **Base saturation (according to Kappen-Adrian) [%]** | | | | | | | | | | | | | | | | | | | | | | | | | | | | | |
| 24 | | | | | | | 34 | | | | | | | | 88 | | | | | | | | 100 | | | | | | |
| **pHH2O [-]** | | | | | | | | | | | | | | | | | | | | | | | | | | | | | |
| 4.6 | | | | | | | 5.0 | | | | | | | | 6.5 | | | | | | | | >7 | | | | | | |
| **C/N ratio in humus and 10 cm mineral soil layer [%C/%N]** | | | | | | | | | | | | | | | | | | | | | | | | | | | | | |
| 15 | | | | | | | 17 | | | | | | | | 24 | | | | | | | | 26 | | | | | | |
| **Volumetric water content in the rooted soil layer [%]** | | | | | | | | | | | | | | | | | | | | | | | | | | | | | |
| 6 | | | | | | | 8 | | | | | | | | 17 | | | | | | | | 19 | | | | | | |
| **Growing season length [d>10°TMT/a]** | | | | | | | | | | | | | | | | | | | | | | | | | | | | | |
| 90 | | | | | | | 101 | | | | | | | | 144 | | | | | | | | 155 | | | | | | |
| **Climatic water balance per vegetation month [mm/Veg.-Mon.]** | | | | | | | | | | | | | | | | | | | | | | | | | | | | | |
| -17 | | | | | | | -14 | | | | | | | | 55 | | | | | | | | 59 | | | | | | |
| **Solar radiation (PAR) in the growing season [kWh m-2 a-1]** | | | | | | | | | | | | | **Lower limit (fuzzy)** | | | | | | | | | **Upper limit (fuzzy)** | | | | | | | |
| 360 | | | | | | | | | 482 | | | | | | | |
| **Lowest frost hardiness of all characteristic tree and shrub species (max. average annual low temperature) [°C]** | | | | | | | | | | | | | | | | | | | | | | | | | | | -28 | | |
| **Natural/near-natural combination of species** | | | | | | | | | | | | | | | | | | | | | | | | | | | | | |
| **Species** | | | | | | **Areal fraction [%]** | | | | | | **Species (english)** | | | | | | | | **Structural element** | | | | | | | | | |
| Picea abies | | | | | | 50 | | | | | | Norway spruce | | | | | | | | Main tree species 1 | | | | | | | | | |
| Abies alba | | | | | | 2 | | | | | | Silver fir | | | | | | | | Secondary tree species | | | | | | | | | |
| Sesleria albicans | | | | | | 2 | | | | | | Blue moor-grass | | | | | | | | Dominant herb species | | | | | | | | | |
| Carex alba | | | | | | 15 | | | | | | White sedge | | | | | | | | Dominant herb species | | | | | | | | | |
| Calamagrostis varia | | | | | | 15 | | | | | | Colored reedgrass | | | | | | | | Dominant herb species | | | | | | | | | |
| Fragaria vesca | | | | | | 2 | | | | | | Wild strawberry | | | | | | | | Dominant herb species | | | | | | | | | |
| Hieracium sylvaticum | | | | | | 2 | | | | | | Wall hawkweed | | | | | | | | Dominant herb species | | | | | | | | | |
| Daphne mezereum | | | | | | 2 | | | | | | Mezereum | | | | | | | | Upper tree/shrub layer | | | | | | | | | |

# **Calamagrostio villosae-(Abieto-)Fagetum sylvatici MIKUSKA 1972**

| **Synonym** | | | | | | | | **1.Sources of the community relevées** | | | | | | | | | | | | | | | | | **No. of relevées** | | | |
| --- | --- | --- | --- | --- | --- | --- | --- | --- | --- | --- | --- | --- | --- | --- | --- | --- | --- | --- | --- | --- | --- | --- | --- | --- | --- | --- | --- | --- |
| **2. EUNIS-Code, mapped EUNIS class** | | | | | | | | | | | | | | | | |
| Cotton grass-Fir-Beech forest  Calamagrostio villosae-Fagetum Mikyska 1972 | | | | | | | | 1. Willner et Grabherr (2007) Vol 1 p. 166 et Table 21b/4 (also: Chytry et al. 2013 tab. 6/12 p. 237+271; Schubert 2001 p. 60) | | | | | | | | | | | | | | | | | 89 | | | |
| 2. T181-Medio-European acidophilous Fagus forests | | | | | | | | | | | | | | | | |
| **Possible climate classes** | | | | | | | | | | | | | | | | | | | | | | | | | | | | |
| 06 | 07 | 14 | 15 | 16 | | 17 | 23 | | 24 | 25 | | | 26 | 27 | 31 | 32 | 33 | | | 34 | | 35 | 36 | 37 | | | 41 | 42 |
| 43 | 44 | 45 | 46 | 47 | | 51 | 52 | | 53 | 54 | | | 55 | 56 | 57 | 60 | 61 | | | 62 | | 63 | 64 | 65 | | | 66 | 67 |
| **Typical site forms according to Benning et al. (2015)** | | | | | | | | | | | | | | | | | | | | | | | | | | | | |
| **Water budget levels** | | | | | | | | **Trophy levels** | | | | | | | | | | **Relief/ Exposition** | | | | | | | | | | |
| T1, T2, T3, T4, T5 | | | | | | | | o, om, m | | | | | | | | | | Plane, Shady slope, Sunny slope | | | | | | | | | | |
| **Typical community parameter ranges** | | | | | | | | | | | | | | | | | | | | | | | | | | | | |
| **Lower limit (fuzzy)** | | | | | | **Lower limit of optimum** | | | | | | | | **Upper limit of optimum** | | | | | | | | **Upper limit (fuzzy)** | | | | | | |
| **Base saturation (according to Kappen-Adrian) [%]** | | | | | | | | | | | | | | | | | | | | | | | | | | | | |
| 5 | | | | | | 9 | | | | | | | | 23 | | | | | | | | 27 | | | | | | |
| **pHH2O [-]** | | | | | | | | | | | | | | | | | | | | | | | | | | | | |
| 3.2 | | | | | | 3.5 | | | | | | | | 4.6 | | | | | | | | 4.9 | | | | | | |
| **C/N ratio in humus and 10 cm mineral soil layer [%C/%N]** | | | | | | | | | | | | | | | | | | | | | | | | | | | | |
| 18 | | | | | | 20 | | | | | | | | 30 | | | | | | | | 32 | | | | | | |
| **Volumetric water content in the rooted soil layer [%]** | | | | | | | | | | | | | | | | | | | | | | | | | | | | |
| 8 | | | | | | 17 | | | | | | | | 51 | | | | | | | | 60 | | | | | | |
| **Growing season length [d>10°TMT/a]** | | | | | | | | | | | | | | | | | | | | | | | | | | | | |
| 110 | | | | | | 117 | | | | | | | | 143 | | | | | | | | 150 | | | | | | |
| **Climatic water balance per vegetation month [mm/Veg.-Mon.]** | | | | | | | | | | | | | | | | | | | | | | | | | | | | |
| -12 | | | | | | 2 | | | | | | | | 56 | | | | | | | | 70 | | | | | | |
| **Solar radiation (PAR) in the growing season [kWh m-2 a-1]** | | | | | | | | | | | | **Lower limit (fuzzy)** | | | | | | | | | **Upper limit (fuzzy)** | | | | | | | |
| 378 | | | | | | | | | 580 | | | | | | | |
| **Lowest frost hardiness of all characteristic tree and shrub species (max. average annual low temperature) [°C]** | | | | | | | | | | | | | | | | | | | | | | | | | | -24 | | |
| **Natural/near-natural combination of species** | | | | | | | | | | | | | | | | | | | | | | | | | | | | |
| **Species** | | | | | **Areal fraction [%]** | | | | | | **Species (english)** | | | | | | | | **Structural element** | | | | | | | | | |
| Abies alba | | | | | 5 | | | | | | Silver fir | | | | | | | | Mixed tree species | | | | | | | | | |
| Picea abies | | | | | 20 | | | | | | Norway spruce | | | | | | | | Main tree species 2 | | | | | | | | | |
| Fagus sylvatica | | | | | 40 | | | | | | European beech | | | | | | | | Main tree species 1 | | | | | | | | | |
| Sorbus aucuparia | | | | | 5 | | | | | | Mountain-ash | | | | | | | | Intermediate tree layer | | | | | | | | | |
| Avenella flexuosa | | | | | 5 | | | | | | Wavy hairgrass | | | | | | | | Dominant herb species | | | | | | | | | |
| Calamagrostis villosa | | | | | 5 | | | | | | Woolly reed grass | | | | | | | | Dominant herb species | | | | | | | | | |
| Oxalis acetosella | | | | | 5 | | | | | | Wood sorrel | | | | | | | | Dominant herb species | | | | | | | | | |
| Vaccinium myrtillus | | | | | 20 | | | | | | Blueberry | | | | | | | | Dominant herb species | | | | | | | | | |
| Dryopteris dilatata | | | | | 5 | | | | | | Broad wood fern | | | | | | | | Dominant herb species | | | | | | | | | |
| Polytrichum formosum | | | | | 5 | | | | | | Beauty haircap moss | | | | | | | | Dominant moss species | | | | | | | | | |

# **Calamagrostio villosae-Piceetum typicum VOLK 1939**

| **Synonym** | | | | | | | **1.Sources of the community relevées** | | | | | | | | | | | | | | | | | | | **No. of relevées** | | | |
| --- | --- | --- | --- | --- | --- | --- | --- | --- | --- | --- | --- | --- | --- | --- | --- | --- | --- | --- | --- | --- | --- | --- | --- | --- | --- | --- | --- | --- | --- |
| **2. EUNIS-Code, mapped EUNIS class** | | | | | | | | | | | | | | | | | | |
| Cotton grass-Spruce forest (typ. subass.)  Barbilophozio-Piceetum typicum Volk 1939 | | | | | | | 1. Hartmann et Jahn (1967) Table II/20 (Willner et Grabherr (2007) Table 43/1,3; Ellenberg et Klötzli 1972 p.714 with Keller et al. 1998) | | | | | | | | | | | | | | | | | | | 422 | | | |
| 2. T312 T31-Temperate hardwood riparian forest | | | | | | | | | | | | | | | | | | |
| **Possible climate classes** | | | | | | | | | | | | | | | | | | | | | | | | | | | | | |
| 06 | 07 | 14 | 15 | 16 | | 17 | | 23 | | 24 | 25 | | | 26 | 27 | 31 | 32 | 33 | | 34 | | | 35 | 36 | 37 | | | 41 | 42 |
| 43 | 44 | 45 | 46 | 47 | | 51 | | 52 | | 53 | 54 | | | 55 | 56 | 57 | 60 | 61 | | 62 | | | 63 | 64 | 65 | | | 66 | 67 |
| **Typical site forms according to Benning et al. (2015)** | | | | | | | | | | | | | | | | | | | | | | | | | | | | | |
| **Water budget levels** | | | | | | | | | **Trophy levels** | | | | | | | | | | **Relief/ Exposition** | | | | | | | | | | |
| T1, T2, T3, T4 | | | | | | | | | o, om, m | | | | | | | | | | Plane, Shady slope | | | | | | | | | | |
| **Typical community parameter ranges** | | | | | | | | | | | | | | | | | | | | | | | | | | | | | |
| **Lower limit (fuzzy)** | | | | | | **Lower limit of optimum** | | | | | | | | | **Upper limit of optimum** | | | | | | | | **Upper limit (fuzzy)** | | | | | | |
| **Base saturation (according to Kappen-Adrian) [%]** | | | | | | | | | | | | | | | | | | | | | | | | | | | | | |
| 3 | | | | | | 7 | | | | | | | | | 22 | | | | | | | | 26 | | | | | | |
| **pHH2O [-]** | | | | | | | | | | | | | | | | | | | | | | | | | | | | | |
| 3 | | | | | | 3.3 | | | | | | | | | 4.5 | | | | | | | | 4.8 | | | | | | |
| **C/N ratio in humus and 10 cm mineral soil layer [%C/%N]** | | | | | | | | | | | | | | | | | | | | | | | | | | | | | |
| 22 | | | | | | 24 | | | | | | | | | 30 | | | | | | | | 31 | | | | | | |
| **Volumetric water content in the rooted soil layer [%]** | | | | | | | | | | | | | | | | | | | | | | | | | | | | | |
| 8 | | | | | | 10 | | | | | | | | | 17 | | | | | | | | 19 | | | | | | |
| **Growing season length [d>10°TMT/a]** | | | | | | | | | | | | | | | | | | | | | | | | | | | | | |
| 90 | | | | | | 90 | | | | | | | | | 140 | | | | | | | | 150 | | | | | | |
| **Climatic water balance per vegetation month [mm/Veg.-Mon.]** | | | | | | | | | | | | | | | | | | | | | | | | | | | | | |
| -17 | | | | | | -11 | | | | | | | | | 95 | | | | | | | | 117 | | | | | | |
| **Solar radiation (PAR) in the growing season [kWh m-2 a-1]** | | | | | | | | | | | | | **Lower limit (fuzzy)** | | | | | | | | **Upper limit (fuzzy)** | | | | | | | | |
| 313 | | | | | | | | 575 | | | | | | | | |
| **Lowest frost hardiness of all characteristic tree and shrub species (max. average annual low temperature) [°C]** | | | | | | | | | | | | | | | | | | | | | | | | | | | -28 | | |
| **Natural/near-natural combination of species** | | | | | | | | | | | | | | | | | | | | | | | | | | | | | |
| **Species** | | | | | **Areal fraction [%]** | | | | | | | **Species (english)** | | | | | | | | | | **Structural element** | | | | | | | |
| Picea abies | | | | | 100 | | | | | | | Norway spruce | | | | | | | | | | Main tree species 1 | | | | | | | |
| Sorbus aucuparia | | | | | 5 | | | | | | | Mountain-ash | | | | | | | | | | Intermediate tree layer | | | | | | | |
| Dryopteris dilatata | | | | | 60 | | | | | | | Broad wood fern | | | | | | | | | | Dominant herb species | | | | | | | |
| Athyrium filix-femina | | | | | 60 | | | | | | | Common lady-fern | | | | | | | | | | Dominant herb species | | | | | | | |
| Vaccinium myrtillus | | | | | 2 | | | | | | | Blueberry | | | | | | | | | | Dominant herb species | | | | | | | |
| Polytrichum commune | | | | | 5 | | | | | | | Golden lady’s hair moss | | | | | | | | | | Dominant moss species | | | | | | | |
| Calypogeia muelleriana | | | | | 5 | | | | | | | Müller's bearded calyx moss | | | | | | | | | | Dominant moss species | | | | | | | |
| Polytrichum formosum | | | | | 5 | | | | | | | Beauty haircap moss | | | | | | | | | | Dominant moss species | | | | | | | |
| Dicranella heteromalla | | | | | 5 | | | | | | | One-sided small fork moss | | | | | | | | | | Dominant moss species | | | | | | | |
| Dicranum scoparium | | | | | 5 | | | | | | | Common fork moss | | | | | | | | | | Dominant moss species | | | | | | | |
| Mnium hornum | | | | | 5 | | | | | | | Swan-necked star moss | | | | | | | | | | Dominant moss species | | | | | | | |
| Rubus idaeus | | | | | 5 | | | | | | | Raspberry | | | | | | | | | | Upper tree/shrub layer | | | | | | | |

# **Calamagrostio villosae-Piceetum lophozietosum TÜXEN 1937**

| **Synonym** | | | | | | | **1.Sources of the community relevées** | | | | | | | | | | | | | | | | | | **No. of relevées** | | | |
| --- | --- | --- | --- | --- | --- | --- | --- | --- | --- | --- | --- | --- | --- | --- | --- | --- | --- | --- | --- | --- | --- | --- | --- | --- | --- | --- | --- | --- |
| **2. EUNIS-Code, mapped EUNIS class** | | | | | | | | | | | | | | | | | |
| Cotton grass-Spruce forest (Liverwort subass.)  Calamagrostio villosae-Fagetum Mikyska 1972 | | | | | | | 1. Hartmann et Jahn (1967) Table II/15, Text Vol. p. 383 (also Chytry et al. 2013 tab. 8/7 p. 372+406; Schubert 2001 p. 88) | | | | | | | | | | | | | | | | | | 191 | | | |
| 2. T312, T31-Temporary montane Norway spruce (Picea abies) forest | | | | | | | | | | | | | | | | | |
| **Possible climate classes** | | | | | | | | | | | | | | | | | | | | | | | | | | | | |
| 06 | 07 | 14 | 15 | 16 | 17 | | 23 | | 24 | 25 | | 26 | | 27 | 31 | 32 | 33 | | 34 | | | 35 | 36 | 37 | | | 41 | 42 |
| 43 | 44 | 45 | 46 | 47 | 51 | | 52 | | 53 | 54 | | 55 | | 56 | 57 | 60 | 61 | | 62 | | | 63 | 64 | 65 | | | 66 | 67 |
| **Typical site forms according to Benning et al. (2015)** | | | | | | | | | | | | | | | | | | | | | | | | | | | | |
| **Water budget levels** | | | | | | | | **Trophy levels** | | | | | | | | | | **Relief/ Exposition** | | | | | | | | | | |
| T1, T2, T3, T4, S1, S2, S3, G3 | | | | | | | | o, om, m | | | | | | | | | | Plane, Shady slope | | | | | | | | | | |
| **Typical community parameter ranges** | | | | | | | | | | | | | | | | | | | | | | | | | | | | |
| **Lower limit (fuzzy)** | | | | | **Lower limit of optimum** | | | | | | | | | **Upper limit of optimum** | | | | | | | | **Upper limit (fuzzy)** | | | | | | |
| **Base saturation (according to Kappen-Adrian) [%]** | | | | | | | | | | | | | | | | | | | | | | | | | | | | |
| 3 | | | | | 7 | | | | | | | | | 23 | | | | | | | | 27 | | | | | | |
| **pHH2O [-]** | | | | | | | | | | | | | | | | | | | | | | | | | | | | |
| 3 | | | | | 3.3 | | | | | | | | | 4.6 | | | | | | | | 4.9 | | | | | | |
| **C/N ratio in humus and 10 cm mineral soil layer [%C/%N]** | | | | | | | | | | | | | | | | | | | | | | | | | | | | |
| 18 | | | | | 20 | | | | | | | | | 30 | | | | | | | | 32 | | | | | | |
| **Volumetric water content in the rooted soil layer [%]** | | | | | | | | | | | | | | | | | | | | | | | | | | | | |
| 4 | | | | | 32 | | | | | | | | | 58 | | | | | | | | 60 | | | | | | |
| **Growing season length [d>10°TMT/a]** | | | | | | | | | | | | | | | | | | | | | | | | | | | | |
| 90 | | | | | 100 | | | | | | | | | 140 | | | | | | | | 150 | | | | | | |
| **Climatic water balance per vegetation month [mm/Veg.-Mon.]** | | | | | | | | | | | | | | | | | | | | | | | | | | | | |
| -22 | | | | | -13 | | | | | | | | | 94 | | | | | | | | 117 | | | | | | |
| **Solar radiation (PAR) in the growing season [kWh m-2 a-1]** | | | | | | | | | | | **Lower limit (fuzzy)** | | | | | | | | | **Upper limit (fuzzy)** | | | | | | | | |
| 306 | | | | | | | | | 509 | | | | | | | | |
| **Lowest frost hardiness of all characteristic tree and shrub species (max. average annual low temperature) [°C]** | | | | | | | | | | | | | | | | | | | | | | | | | | -28 | | |
| **Natural/near-natural combination of species** | | | | | | | | | | | | | | | | | | | | | | | | | | | | |
| **Species** | | | | | | **Areal fraction [%]** | | | | | | | **Species (english)** | | | | | | | | **Structural element** | | | | | | | |
| Picea abies | | | | | | 75 | | | | | | | Norway spruce | | | | | | | | Main tree species 1 | | | | | | | |
| Sorbus aucuparia | | | | | | 60 | | | | | | | Mountain-ash | | | | | | | | Intermediate tree layer | | | | | | | |
| Biatora helvola | | | | | | 5 | | | | | | | Crustose lichen | | | | | | | | Dominant lichen species | | | | | | | |
| Calamagrostis villosa | | | | | | 40 | | | | | | | Woolly reed grass | | | | | | | | Dominant herb species | | | | | | | |
| Barbilophozia floerkei | | | | | | 5 | | | | | | | Floerke bearded moss | | | | | | | | Dominant moss species | | | | | | | |
| Sphagnum quinquefarium | | | | | | 5 | | | | | | | Five-line peat moss | | | | | | | | Dominant moss species | | | | | | | |
| Dicranum scoparium | | | | | | 5 | | | | | | | Common fork moss | | | | | | | | Dominant moss species | | | | | | | |
| Polytrichum formosum | | | | | | 5 | | | | | | | Beauty haircap moss | | | | | | | | Dominant moss species | | | | | | | |
| Barbilophozia lycopodioides | | | | | | 5 | | | | | | | Large bearded moss | | | | | | | | Dominant moss species | | | | | | | |
| Sphagnum girgensohnii | | | | | | 5 | | | | | | | Girgensohn’s peat moss | | | | | | | | Dominant moss species | | | | | | | |
| Leucobryum glaucum | | | | | | 5 | | | | | | | Common white moss | | | | | | | | Dominant moss species | | | | | | | |

# **Calamagrostio villosae-Piceetum vaccinietosum vitis-idaea VOLK 1939**

| **Synonym** | | | | | | | | | | **1.Sources of the community relevées** | | | | | | | | | | | | | | | **No. of relevées** | | | | |
| --- | --- | --- | --- | --- | --- | --- | --- | --- | --- | --- | --- | --- | --- | --- | --- | --- | --- | --- | --- | --- | --- | --- | --- | --- | --- | --- | --- | --- | --- |
| **2. EUNIS-Code, mapped EUNIS class** | | | | | | | | | | | | | | |
| Cotton grass-Spruce forest (Cranberry subass.)  Barbilophozio-Piceetum vaccinietosum vitis-idaea Volk 1939 | | | | | | | | | | 1. Hartmann et Jahn (1967) Tab. II/29 (Willner et Grabherr (2007) Table 43/2,4) | | | | | | | | | | | | | | | 80 | | | | |
| 2. T312, T31-Temperate hardwood riparian forest | | | | | | | | | | | | | | |
| **Possible climate classes** | | | | | | | | | | | | | | | | | | | | | | | | | | | | | |
| 06 | 07 | 14 | 15 | 16 | 17 | | 23 | | 24 | | 25 | | 26 | | 27 | 31 | 32 | 33 | | 34 | | | 35 | 36 | | | 37 | 41 | 42 |
| 43 | 44 | 45 | 46 | 47 | 51 | | 52 | | 53 | | 54 | | 55 | | 56 | 57 | 60 | 61 | | 62 | | | 63 | 64 | | | 65 | 66 | 67 |
| **Typical site forms according to Benning et al. (2015)** | | | | | | | | | | | | | | | | | | | | | | | | | | | | | |
| **Water budget levels** | | | | | | | | **Trophy levels** | | | | | | | | | | | | | **Relief/ Exposition** | | | | | | | | |
| T1, T2, T3, T4, S1, S2, S3, G3 | | | | | | | | o, om, m | | | | | | | | | | | | | Sunny slope | | | | | | | | |
| **Typical community parameter ranges** | | | | | | | | | | | | | | | | | | | | | | | | | | | | | |
| **Lower limit (fuzzy)** | | | | | **Lower limit of optimum** | | | | | | | | | | **Upper limit of optimum** | | | | | | | | **Upper limit (fuzzy)** | | | | | | |
| **Base saturation (according to Kappen-Adrian) [%]** | | | | | | | | | | | | | | | | | | | | | | | | | | | | | |
| 3 | | | | | 7 | | | | | | | | | | 22 | | | | | | | | 26 | | | | | | |
| **pHH2O [-]** | | | | | | | | | | | | | | | | | | | | | | | | | | | | | |
| 3 | | | | | 3.3 | | | | | | | | | | 4.5 | | | | | | | | 4.8 | | | | | | |
| **C/N ratio in humus and 10 cm mineral soil layer [%C/%N]** | | | | | | | | | | | | | | | | | | | | | | | | | | | | | |
| 18 | | | | | 20 | | | | | | | | | | 30 | | | | | | | | 32 | | | | | | |
| **Volumetric water content in the rooted soil layer [%]** | | | | | | | | | | | | | | | | | | | | | | | | | | | | | |
| 5 | | | | | 7 | | | | | | | | | | 15 | | | | | | | | 17 | | | | | | |
| **Growing season length [d>10°TMT/a]** | | | | | | | | | | | | | | | | | | | | | | | | | | | | | |
| 100 | | | | | 100 | | | | | | | | | | 142 | | | | | | | | 150 | | | | | | |
| **Climatic water balance per vegetation month [mm/Veg.-Mon.]** | | | | | | | | | | | | | | | | | | | | | | | | | | | | | |
| -12 | | | | | -10 | | | | | | | | | | 96 | | | | | | | | 117 | | | | | | |
| **Solar radiation (PAR) in the growing season [kWh m-2 a-1]** | | | | | | | | | | | | **Lower limit (fuzzy)** | | | | | | | **Upper limit (fuzzy)** | | | | | | | | | | |
| 327 | | | | | | | 612 | | | | | | | | | | |
| **Lowest frost hardiness of all characteristic tree and shrub species (max. average annual low temperature) [°C]** | | | | | | | | | | | | | | | | | | | | | | | | | | -28 | | | |
| **Natural/near-natural combination of species** | | | | | | | | | | | | | | | | | | | | | | | | | | | | | |
| **Species** | | | | | | **Areal fraction [%]** | | | | | | | | **Species (english)** | | | | | | | | **Structural element** | | | | | | | |
| Picea abies | | | | | | 90 | | | | | | | | Norway spruce | | | | | | | | Main tree species 1 | | | | | | | |
| Betula pendula | | | | | | 10 | | | | | | | | Silver birch | | | | | | | | Main tree species 2 | | | | | | | |
| Sorbus aucuparia | | | | | | 60 | | | | | | | | Mountain-ash | | | | | | | | Intermediate tree layer | | | | | | | |
| Calamagrostis villosa | | | | | | 40 | | | | | | | | Woolly reed grass | | | | | | | | Dominant herb species | | | | | | | |
| Dicranum scoparium | | | | | | 5 | | | | | | | | Common fork moss | | | | | | | | Dominant moss species | | | | | | | |
| Dicranella heteromalla | | | | | | 5 | | | | | | | | One-sided small fork moss | | | | | | | | Dominant moss species | | | | | | | |
| Polytrichum formosum | | | | | | 5 | | | | | | | | Beauty haircap moss | | | | | | | | Dominant moss species | | | | | | | |
| Barbilophozia lycopodioides | | | | | | 5 | | | | | | | | Large bearded moss | | | | | | | | Dominant moss species | | | | | | | |
| Rhytidiadelphus subpinnatus | | | | | | 5 | | | | | | | | Feathered wreath moss | | | | | | | | Dominant moss species | | | | | | | |

# **Cardamino armarae-Alnetum glutinosae (MEIJER-DREES 1936) PASSARGE 1968**

| **Synonym** | | | | **1.Sources of the community relevées** | | | | | | | | | | | | | | | | | | | | | | **No. of relevées** | | | |
| --- | --- | --- | --- | --- | --- | --- | --- | --- | --- | --- | --- | --- | --- | --- | --- | --- | --- | --- | --- | --- | --- | --- | --- | --- | --- | --- | --- | --- | --- |
| **2. EUNIS-Code, mapped EUNIS class** | | | | | | | | | | | | | | | | | | | | | |
| Bittercress-Black alder forest | | | | 1. Passarge et Hofmann (1968) Tab. 7c (also Berg et al 2001 Tab. 30.1.1.2 and Text p. 440) | | | | | | | | | | | | | | | | | | | | | | 152 | | | |
| 2. T1511 - Meso-eutrophic swamp alder forests | | | | | | | | | | | | | | | | | | | | | |
| **Possible climate classes** | | | | | | | | | | | | | | | | | | | | | | | | | | | | | |
| 06 | 07 | 14 | 15 | | 16 | | 17 | 23 | | 24 | 25 | | | 26 | 27 | 31 | 32 | 33 | | | 34 | | 35 | 36 | 37 | | | 41 | 42 |
| 43 | 44 | 45 | 46 | | 47 | | 51 | 52 | | 53 | 54 | | | 55 | 56 | 57 | 60 | 61 | | | 62 | | 63 | 64 | 65 | | | 66 | 67 |
| **Typical site forms according to Benning et al. (2015)** | | | | | | | | | | | | | | | | | | | | | | | | | | | | | |
| **Water budget levels** | | | | | | | | | **Trophy levels** | | | | | | | | | | | **Relief/ Exposition** | | | | | | | | | |
| S5 | | | | | | | | | e | | | | | | | | | | | Plane, Shady slope, Sunny slope | | | | | | | | | |
| **Typical community parameter ranges** | | | | | | | | | | | | | | | | | | | | | | | | | | | | | |
| **Lower limit (fuzzy)** | | | | | | | **Lower limit of optimum** | | | | | | | | **Upper limit of optimum** | | | | | | | | **Upper limit (fuzzy)** | | | | | | |
| **Base saturation (according to Kappen-Adrian) [%]** | | | | | | | | | | | | | | | | | | | | | | | | | | | | | |
| 23 | | | | | | | 45 | | | | | | | | 100 | | | | | | | | 100 | | | | | | |
| **pHH2O [-]** | | | | | | | | | | | | | | | | | | | | | | | | | | | | | |
| 4.5 | | | | | | | 5.2 | | | | | | | | 7.0 | | | | | | | | 8 | | | | | | |
| **C/N ratio in humus and 10 cm mineral soil layer [%C/%N]** | | | | | | | | | | | | | | | | | | | | | | | | | | | | | |
| 10 | | | | | | | 13 | | | | | | | | 25 | | | | | | | | 28 | | | | | | |
| **Volumetric water content in the rooted soil layer [%]** | | | | | | | | | | | | | | | | | | | | | | | | | | | | | |
| 36 | | | | | | | 40 | | | | | | | | 54 | | | | | | | | 58 | | | | | | |
| **Growing season length [d>10°TMT/a]** | | | | | | | | | | | | | | | | | | | | | | | | | | | | | |
| 115 | | | | | | | 133 | | | | | | | | 203 | | | | | | | | 220 | | | | | | |
| **Climatic water balance per vegetation month [mm/Veg.-Mon.]** | | | | | | | | | | | | | | | | | | | | | | | | | | | | | |
| -46 | | | | | | | -40 | | | | | | | | 60 | | | | | | | | 70 | | | | | | |
| **Solar radiation (PAR) in the growing season [kWh m-2 a-1]** | | | | | | | | | | | | | **Lower limit (fuzzy)** | | | | | | | | | **Upper limit (fuzzy)** | | | | | | | |
| 318 | | | | | | | | | 518 | | | | | | | |
| **Lowest frost hardiness of all characteristic tree and shrub species (max. average annual low temperature) [°C]** | | | | | | | | | | | | | | | | | | | | | | | | | | | -28 | | |
| **Natural/near-natural combination of species** | | | | | | | | | | | | | | | | | | | | | | | | | | | | | |
| **Species** | | | | | | **Areal fraction [%]** | | | | | | **Species (english)** | | | | | | | **Structural element** | | | | | | | | | | |
| Alnus glutinosa | | | | | | 40 | | | | | | Common alder | | | | | | | Main tree species 1 | | | | | | | | | | |
| Fraxinus excelsior | | | | | | 30 | | | | | | Common ash | | | | | | | Main tree species 2 | | | | | | | | | | |
| Carex acutiformis | | | | | | 5 | | | | | | Lesser pond-sedge | | | | | | | Dominant herb species | | | | | | | | | | |
| Carex remota | | | | | | 15 | | | | | | Remote sedge | | | | | | | Dominant herb species | | | | | | | | | | |
| Poa trivialis | | | | | | 5 | | | | | | Rough meadow-grass | | | | | | | Dominant herb species | | | | | | | | | | |
| Deschampsia cespitosa | | | | | | 5 | | | | | | Tussock hairgrass | | | | | | | Dominant herb species | | | | | | | | | | |
| Ranunculus repens | | | | | | 5 | | | | | | Creeping crowfoot | | | | | | | Dominant herb species | | | | | | | | | | |
| Solanum dulcamara | | | | | | 5 | | | | | | Bittersweet | | | | | | | Dominant herb species | | | | | | | | | | |
| Cardamine armara | | | | | | 15 | | | | | | Large bitter-cress | | | | | | | Dominant herb species | | | | | | | | | | |
| Geum rivale | | | | | | 5 | | | | | | Purple avens | | | | | | | Dominant herb species | | | | | | | | | | |
| Brachythecium rivulare | | | | | | 15 | | | | | | Brook short box moss | | | | | | | Dominant moss species | | | | | | | | | | |
| Rubus idaeus | | | | | | 5 | | | | | | Raspberry | | | | | | | Upper tree/shrub layer | | | | | | | | | | |

# **Carici elongatae-Alnetum glutinosae SCHWICKERATH 1933**

| **Synonym** | | | | | | | **1.Sources of the community relevées** | | | | | | | | | | | | | | | | | | | **No. of relevées** | | | |
| --- | --- | --- | --- | --- | --- | --- | --- | --- | --- | --- | --- | --- | --- | --- | --- | --- | --- | --- | --- | --- | --- | --- | --- | --- | --- | --- | --- | --- | --- |
| **2. EUNIS-Code, mapped EUNIS class** | | | | | | | | | | | | | | | | | | |
| Elongated sedge-Black alder-birch forest  Carici elongatae-Alnetum betuletosum Bodeux 1955 | | | | | | | 1. Oberdorfer (1992) Vol IV, Table 251/5b and Text Vol. p. 30 (also Soó 1964b p. 230; Schmidt (2002) 11.3, Table 2/8/1; Tüxen (1937) p. 136; Langguth, Kopp et Passarge (1965) p. 25; Douda et al. 2015 Tab. E-27; Willner et Grabherr (2007) Table 12/5; Ellenberg et Klötzli 1972 p.704 with Keller et al. 1998; Chytry et al. 2013 tab. 5/2 p. 183+172; Niemeyer et al. 2010 p. 27 ; Hofmann et Pommer 2013 p. 117; Schubert 2001 p. 31) | | | | | | | | | | | | | | | | | | | 970 | | | |
| 2. T15112, T1511 - Meso-eutrophic swamp alder forests | | | | | | | | | | | | | | | | | | |
| **Possible climate classes** | | | | | | | | | | | | | | | | | | | | | | | | | | | | | |
| 06 | 07 | 14 | 15 | | 16 | 17 | | 23 | | 24 | | 25 | | 26 | 27 | 31 | 32 | 33 | | | 34 | | 35 | 36 | 37 | | | 41 | 42 |
| 43 | 44 | 45 | 46 | | 47 | 51 | | 52 | | 53 | | 54 | | 55 | 56 | 57 | 60 | 61 | | | 62 | | 63 | 64 | 65 | | | 66 | 67 |
| **Typical site forms according to Benning et al. (2015)** | | | | | | | | | | | | | | | | | | | | | | | | | | | | | |
| **Water budget levels** | | | | | | | | | **Trophy levels** | | | | | | | | | | **Relief/ Exposition** | | | | | | | | | | |
| G6 | | | | | | | | | m | | | | | | | | | | Plane | | | | | | | | | | |
| **Typical community parameter ranges** | | | | | | | | | | | | | | | | | | | | | | | | | | | | | |
| **Lower limit (fuzzy)** | | | | | | **Lower limit of optimum** | | | | | | | | | **Upper limit of optimum** | | | | | | | | **Upper limit (fuzzy)** | | | | | | |
| **Base saturation (according to Kappen-Adrian) [%]** | | | | | | | | | | | | | | | | | | | | | | | | | | | | | |
| 13 | | | | | | 18 | | | | | | | | | 40 | | | | | | | | 45 | | | | | | |
| **pHH2O [-]** | | | | | | | | | | | | | | | | | | | | | | | | | | | | | |
| 3.8 | | | | | | 4.2 | | | | | | | | | 5.8 | | | | | | | | 6.2 | | | | | | |
| **C/N ratio in humus and 10 cm mineral soil layer [%C/%N]** | | | | | | | | | | | | | | | | | | | | | | | | | | | | | |
| 10 | | | | | | 14 | | | | | | | | | 28 | | | | | | | | 32 | | | | | | |
| **Volumetric water content in the rooted soil layer [%]** | | | | | | | | | | | | | | | | | | | | | | | | | | | | | |
| 42 | | | | | | 45 | | | | | | | | | 57 | | | | | | | | 60 | | | | | | |
| **Growing season length [d>10°TMT/a]** | | | | | | | | | | | | | | | | | | | | | | | | | | | | | |
| 115 | | | | | | 132 | | | | | | | | | 198 | | | | | | | | 215 | | | | | | |
| **Climatic water balance per vegetation month [mm/Veg.-Mon.]** | | | | | | | | | | | | | | | | | | | | | | | | | | | | | |
| -46 | | | | | | -27 | | | | | | | | | 60 | | | | | | | | 70 | | | | | | |
| **Solar radiation (PAR) in the growing season [kWh m-2 a-1]** | | | | | | | | | | | | | **Lower limit (fuzzy)** | | | | | | | | | **Upper limit (fuzzy)** | | | | | | | |
| 322 | | | | | | | | | 794 | | | | | | | |
| **Lowest frost hardiness of all characteristic tree and shrub species (max. average annual low temperature) [°C]** | | | | | | | | | | | | | | | | | | | | | | | | | | | -28 | | |
| **Natural/near-natural combination of species** | | | | | | | | | | | | | | | | | | | | | | | | | | | | | |
| **Species** | | | | **Areal fraction [%]** | | | | | | | **Species (english)** | | | | | | | | | **Structural element** | | | | | | | | | |
| Alnus glutinosa | | | | 70 | | | | | | | Common alder | | | | | | | | | Main tree species 1 | | | | | | | | | |
| Betula pubescens | | | | 2 | | | | | | | Downy birch | | | | | | | | | Secondary tree species | | | | | | | | | |
| Carex acutiformis | | | | 20 | | | | | | | Lesser pond-sedge | | | | | | | | | Dominant herb species | | | | | | | | | |
| Carex elongata | | | | 60 | | | | | | | Elongated sedge | | | | | | | | | Dominant herb species | | | | | | | | | |

# **Carici microcarpae-Alnetum glutinosae FOGGI et al. 2006**

| **Synonym** | | | | **1.Sources of the community relevées** | | | | | | | | | | | | | | | | | | | | | | | **No. of relevées** | | | |
| --- | --- | --- | --- | --- | --- | --- | --- | --- | --- | --- | --- | --- | --- | --- | --- | --- | --- | --- | --- | --- | --- | --- | --- | --- | --- | --- | --- | --- | --- | --- |
| **2. EUNIS-Code, mapped EUNIS class** | | | | | | | | | | | | | | | | | | | | | | |
| Small-root sedge-Black alder forest | | | | 1. Sciandrello et al. (2022) Tab. S1/5 | | | | | | | | | | | | | | | | | | | | | | | 21 | | | |
| 2. T12141, T12 - Alnus glutinosa-Alnus incana forest on riparian and mineral soils | | | | | | | | | | | | | | | | | | | | | | |
| **Possible climate classes** | | | | | | | | | | | | | | | | | | | | | | | | | | | | | | |
| 06 | 07 | 14 | 15 | 16 | | 17 | | 23 | | 24 | 25 | 26 | | | 27 | 31 | 32 | 33 | | | 34 | | 35 | | 36 | 37 | | | 41 | 42 |
| 43 | 44 | 45 | 46 | 47 | | 51 | | 52 | | 53 | 54 | 55 | | | 56 | 57 | 60 | 61 | | | 62 | | 63 | | 64 | 65 | | | 66 | 67 |
| **Typical site forms according to Benning et al. (2015)** | | | | | | | | | | | | | | | | | | | | | | | | | | | | | | |
| **Water budget levels** | | | | | | | | | **Trophy levels** | | | | | | | | | | **Relief/ Exposition** | | | | | | | | | | | |
| G3, G4, G5, G6, S5 | | | | | | | | | m, mo | | | | | | | | | | Plane, Shady slope, Sunny slope | | | | | | | | | | | |
| **Typical community parameter ranges** | | | | | | | | | | | | | | | | | | | | | | | | | | | | | | |
| **Lower limit (fuzzy)** | | | | | | | **Lower limit of optimum** | | | | | | | | | **Upper limit of optimum** | | | | | | | | **Upper limit (fuzzy)** | | | | | | |
| **Base saturation (according to Kappen-Adrian) [%]** | | | | | | | | | | | | | | | | | | | | | | | | | | | | | | |
| 18 | | | | | | | 21 | | | | | | | | | 31 | | | | | | | | 34 | | | | | | |
| **pHH2O [-]** | | | | | | | | | | | | | | | | | | | | | | | | | | | | | | |
| 4.2 | | | | | | | 4.4 | | | | | | | | | 5.3 | | | | | | | | 5.5 | | | | | | |
| **C/N ratio in humus and 10 cm mineral soil layer [%C/%N]** | | | | | | | | | | | | | | | | | | | | | | | | | | | | | | |
| 18 | | | | | | | 19 | | | | | | | | | 25 | | | | | | | | 26 | | | | | | |
| **Volumetric water content in the rooted soil layer [%]** | | | | | | | | | | | | | | | | | | | | | | | | | | | | | | |
| 32 | | | | | | | 34 | | | | | | | | | 40 | | | | | | | | 42 | | | | | | |
| **Growing season length [d>10°TMT/a]** | | | | | | | | | | | | | | | | | | | | | | | | | | | | | | |
| 190 | | | | | | | 202 | | | | | | | | | 248 | | | | | | | | 260 | | | | | | |
| **Climatic water balance per vegetation month [mm/Veg.-Mon.]** | | | | | | | | | | | | | | | | | | | | | | | | | | | | | | |
| -12 | | | | | | | -12 | | | | | | | | | 55 | | | | | | | | 59 | | | | | | |
| **Solar radiation (PAR) in the growing season [kWh m-2 a-1]** | | | | | | | | | | | | | | **Lower limit (fuzzy)** | | | | | | | | **Upper limit (fuzzy)** | | | | | | | | |
| 885 | | | | | | | | 1017 | | | | | | | | |
| **Lowest frost hardiness of all characteristic tree and shrub species (max. average annual low temperature) [°C]** | | | | | | | | | | | | | | | | | | | | | | | | | | | | -28 | | |
| **Natural/near-natural combination of species** | | | | | | | | | | | | | | | | | | | | | | | | | | | | | | |
| **Species** | | | | | **Areal fraction [%]** | | | | | | | | **Species (english)** | | | | | | | **Structural element** | | | | | | | | | | |
| Alnus glutinosa | | | | | 80 | | | | | | | | Common alder | | | | | | | Main tree species 1 | | | | | | | | | | |
| Carex microcarpa | | | | | 5 | | | | | | | | Small root sedge | | | | | | | Dominant herb species | | | | | | | | | | |
| Hedera helix | | | | | 5 | | | | | | | | English ivy | | | | | | | Upper tree/shrub layer | | | | | | | | | | |
| Pteridium aquilinum | | | | | 2 | | | | | | | | Bracken | | | | | | | Dominant herb species | | | | | | | | | | |
| Osmunda regalis | | | | | 2 | | | | | | | | Royal fern | | | | | | | Dominant herb species | | | | | | | | | | |
| Polystichum setiferum | | | | | 2 | | | | | | | | Awn shield fern | | | | | | | Dominant herb species | | | | | | | | | | |
| Rubus ulmifolius | | | | | 5 | | | | | | | | Elm leaf blackberry | | | | | | | Upper tree/shrub layer | | | | | | | | | | |

# **Carici pallescentis-Alnetum glutinosae LANDI et ANGIOLINI 2010**

| **Synonym** | | | | | **1.Sources of the community relevées** | | | | | | | | | | | | | | | | | | | | | | | | **No. of relevées** | | | |
| --- | --- | --- | --- | --- | --- | --- | --- | --- | --- | --- | --- | --- | --- | --- | --- | --- | --- | --- | --- | --- | --- | --- | --- | --- | --- | --- | --- | --- | --- | --- | --- | --- |
| **2. EUNIS-Code, mapped EUNIS class** | | | | | | | | | | | | | | | | | | | | | | | |
| White sedge-Black alder swamp forest | | | | | 1. Landi, M.; Angiolini, C. (2010) Tab. III (also: Sciandrello et al. (2022) Tab. S1/7) | | | | | | | | | | | | | | | | | | | | | | | | 39 | | | |
| 2. T12141, T12 - Alnus glutinosa-Alnus incana forest on riparian and mineral soils | | | | | | | | | | | | | | | | | | | | | | | |
| **Possible climate classes** | | | | | | | | | | | | | | | | | | | | | | | | | | | | | | | | |
| 06 | 07 | 14 | 15 | 16 | | | 17 | | 23 | | 24 | 25 | | 26 | | 27 | | 31 | 32 | 33 | | | 34 | | 35 | | 36 | 37 | | | 41 | 42 |
| 43 | 44 | 45 | 46 | 47 | | | 51 | | 52 | | 53 | 54 | | 55 | | 56 | | 57 | 60 | 61 | | | 62 | | 63 | | 64 | 65 | | | 66 | 67 |
| **Typical site forms according to Benning et al. (2015)** | | | | | | | | | | | | | | | | | | | | | | | | | | | | | | | | |
| **Water budget levels** | | | | | | | | | | **Trophy levels** | | | | | | | | | | | **Relief/ Exposition** | | | | | | | | | | | |
| G3, G4, G5, G6 | | | | | | | | | | d, o | | | | | | | | | | | Plane, Shady slope, Sunny slope | | | | | | | | | | | |
| **Typical community parameter ranges** | | | | | | | | | | | | | | | | | | | | | | | | | | | | | | | | |
| **Lower limit (fuzzy)** | | | | | | | | **Lower limit of optimum** | | | | | | | | | **Upper limit of optimum** | | | | | | | | | **Upper limit (fuzzy)** | | | | | | |
| **Base saturation (according to Kappen-Adrian) [%]** | | | | | | | | | | | | | | | | | | | | | | | | | | | | | | | | |
| 13 | | | | | | | | 16 | | | | | | | | | 26 | | | | | | | | | 28 | | | | | | |
| **pHH2O [-]** | | | | | | | | | | | | | | | | | | | | | | | | | | | | | | | | |
| 3.8 | | | | | | | | 4.0 | | | | | | | | | 4.8 | | | | | | | | | 5 | | | | | | |
| **C/N ratio in humus and 10 cm mineral soil layer [%C/%N]** | | | | | | | | | | | | | | | | | | | | | | | | | | | | | | | | |
| 18 | | | | | | | | 19 | | | | | | | | | 23 | | | | | | | | | 24 | | | | | | |
| **Volumetric water content in the rooted soil layer [%]** | | | | | | | | | | | | | | | | | | | | | | | | | | | | | | | | |
| 32 | | | | | | | | 34 | | | | | | | | | 40 | | | | | | | | | 42 | | | | | | |
| **Growing season length [d>10°TMT/a]** | | | | | | | | | | | | | | | | | | | | | | | | | | | | | | | | |
| 220 | | | | | | | | 227 | | | | | | | | | 253 | | | | | | | | | 260 | | | | | | |
| **Climatic water balance per vegetation month [mm/Veg.-Mon.]** | | | | | | | | | | | | | | | | | | | | | | | | | | | | | | | | |
| -3 | | | | | | | | 0 | | | | | | | | | 65 | | | | | | | | | 70 | | | | | | |
| **Solar radiation (PAR) in the growing season [kWh m-2 a-1]** | | | | | | | | | | | | | | | **Lower limit (fuzzy)** | | | | | | | | | **Upper limit (fuzzy)** | | | | | | | | |
| 840 | | | | | | | | | 916 | | | | | | | | |
| **Lowest frost hardiness of all characteristic tree and shrub species (max. average annual low temperature) [°C]** | | | | | | | | | | | | | | | | | | | | | | | | | | | | | | -28 | | |
| **Natural/near-natural combination of species** | | | | | | | | | | | | | | | | | | | | | | | | | | | | | | | | |
| **Species** | | | | | | **Areal fraction [%]** | | | | | | | **Species (english)** | | | | | | | | | **Structural element** | | | | | | | | | | |
| Alnus glutinosa | | | | | | 80 | | | | | | | Common alder | | | | | | | | | Main tree species 1 | | | | | | | | | | |
| Castanea sativa | | | | | | 2 | | | | | | | Chestnut | | | | | | | | | Secondary tree species | | | | | | | | | | |
| Sorbus torminalis | | | | | | 2 | | | | | | | Service tree | | | | | | | | | Intermediate tree layer | | | | | | | | | | |
| Carex remota | | | | | | 5 | | | | | | | Remote sedge | | | | | | | | | Dominant herb species | | | | | | | | | | |
| Osmunda regalis | | | | | | 5 | | | | | | | Royal fern | | | | | | | | | Dominant herb species | | | | | | | | | | |
| Athyrium filix-femina | | | | | | 5 | | | | | | | Common lady-fern | | | | | | | | | Dominant herb species | | | | | | | | | | |
| Blechnum spicant | | | | | | 5 | | | | | | | Common ribbed fern | | | | | | | | | Dominant herb species | | | | | | | | | | |
| Rubus hirtus | | | | | | 2 | | | | | | | Dark glandular blackberry | | | | | | | | | Upper tree/shrub layer | | | | | | | | | | |
| Rhamnus frangula | | | | | | 2 | | | | | | | Alder buckthorn | | | | | | | | | Upper tree/shrub layer | | | | | | | | | | |
| Ilex aquifolium | | | | | | 5 | | | | | | | English holly | | | | | | | | | Upper tree/shrub layer | | | | | | | | | | |

# **Carici pendulae-Aceretum pseudoplatani (ETTER 1947) OBERDORFER 1957**

| **Synonym** | | | | | | | | **1.Sources of the community relevées** | | | | | | | | | | | | | | | | | **No. of relevées** | | | |
| --- | --- | --- | --- | --- | --- | --- | --- | --- | --- | --- | --- | --- | --- | --- | --- | --- | --- | --- | --- | --- | --- | --- | --- | --- | --- | --- | --- | --- |
| **2. EUNIS-Code, mapped EUNIS class** | | | | | | | | | | | | | | | | |
| Hanging sedge-Mountain maple forest  Adoxo-Aceretum Passarge 1960 nom. conserv. propos. | | | | | | | | 1. Willner et Grabherr (2007) Vol 1 p. 135 et Table 19/17 (also Mucina et al. (1993) Teil III, p. 110 | | | | | | | | | | | | | | | | | 135 | | | |
| 2. T1F1, T1F1 - Medio-European ravine forests | | | | | | | | | | | | | | | | |
| **Possible climate classes** | | | | | | | | | | | | | | | | | | | | | | | | | | | | |
| 06 | 07 | 14 | 15 | 16 | 17 | | 23 | | 24 | 25 | | | 26 | 27 | 31 | 32 | 33 | | | 34 | | 35 | 36 | 37 | | | 41 | 42 |
| 43 | 44 | 45 | 46 | 47 | 51 | | 52 | | 53 | 54 | | | 55 | 56 | 57 | 60 | 61 | | | 62 | | 63 | 64 | 65 | | | 66 | 67 |
| **Typical site forms according to Benning et al. (2015)** | | | | | | | | | | | | | | | | | | | | | | | | | | | | |
| **Water budget levels** | | | | | | | | **Trophy levels** | | | | | | | | | | **Relief/ Exposition** | | | | | | | | | | |
| T1, T2, T3, T4, T5 | | | | | | | | mo | | | | | | | | | | Shady slope | | | | | | | | | | |
| **Typical community parameter ranges** | | | | | | | | | | | | | | | | | | | | | | | | | | | | |
| **Lower limit (fuzzy)** | | | | | **Lower limit of optimum** | | | | | | | | | **Upper limit of optimum** | | | | | | | | **Upper limit (fuzzy)** | | | | | | |
| **Base saturation (according to Kappen-Adrian) [%]** | | | | | | | | | | | | | | | | | | | | | | | | | | | | |
| 23 | | | | | 38 | | | | | | | | | 100 | | | | | | | | 100 | | | | | | |
| **pHH2O [-]** | | | | | | | | | | | | | | | | | | | | | | | | | | | | |
| 4.5 | | | | | 5.2 | | | | | | | | | 7.0 | | | | | | | | 8 | | | | | | |
| **C/N ratio in humus and 10 cm mineral soil layer [%C/%N]** | | | | | | | | | | | | | | | | | | | | | | | | | | | | |
| 10 | | | | | 13 | | | | | | | | | 23 | | | | | | | | 26 | | | | | | |
| **Volumetric water content in the rooted soil layer [%]** | | | | | | | | | | | | | | | | | | | | | | | | | | | | |
| 8 | | | | | 22 | | | | | | | | | 27 | | | | | | | | 28 | | | | | | |
| **Growing season length [d>10°TMT/a]** | | | | | | | | | | | | | | | | | | | | | | | | | | | | |
| 110 | | | | | 128 | | | | | | | | | 202 | | | | | | | | 220 | | | | | | |
| **Climatic water balance per vegetation month [mm/Veg.-Mon.]** | | | | | | | | | | | | | | | | | | | | | | | | | | | | |
| -27 | | | | | -12 | | | | | | | | | 238 | | | | | | | | 291 | | | | | | |
| **Solar radiation (PAR) in the growing season [kWh m-2 a-1]** | | | | | | | | | | | **Lower limit (fuzzy)** | | | | | | | | | | **Upper limit (fuzzy)** | | | | | | | |
| 406 | | | | | | | | | | 697 | | | | | | | |
| **Lowest frost hardiness of all characteristic tree and shrub species (max. average annual low temperature) [°C]** | | | | | | | | | | | | | | | | | | | | | | | | | | -24 | | |
| **Natural/near-natural combination of species** | | | | | | | | | | | | | | | | | | | | | | | | | | | | |
| **Species** | | | | | | **Areal fraction [%]** | | | | | | **Species (english)** | | | | | | | **Structural element** | | | | | | | | | |
| Ulmus glabra | | | | | | 15 | | | | | | Wych elm | | | | | | | Mixed tree species | | | | | | | | | |
| Fraxinus excelsior | | | | | | 50 | | | | | | Common ash | | | | | | | Main tree species 1 | | | | | | | | | |
| Acer pseudoplatanus | | | | | | 25 | | | | | | Golden sycamore | | | | | | | Main tree species 2 | | | | | | | | | |
| Brachypodium sylvaticum | | | | | | 5 | | | | | | False brome | | | | | | | Dominant herb species | | | | | | | | | |
| Lamium galeobdolon | | | | | | 5 | | | | | | Yellow archangel | | | | | | | Dominant herb species | | | | | | | | | |
| Aegopodium podagraria | | | | | | 25 | | | | | | Bishop’s goutweed | | | | | | | Dominant herb species | | | | | | | | | |
| Corylus avellana | | | | | | 5 | | | | | | Hazel | | | | | | | Upper tree/shrub layer | | | | | | | | | |

# **Carici remotae-Fraxinetum excelsi W. KOCH 1926 ex FABER 1936**

| **Synonym** | | | | **1.Sources of the community relevées** | | | | | | | | | | | | | | | | | | | | | | **No. of relevées** | | | |
| --- | --- | --- | --- | --- | --- | --- | --- | --- | --- | --- | --- | --- | --- | --- | --- | --- | --- | --- | --- | --- | --- | --- | --- | --- | --- | --- | --- | --- | --- |
| **2. EUNIS-Code, mapped EUNIS class** | | | | | | | | | | | | | | | | | | | | | |
| Angular sedge-Black alder-ash forest | | | | 1. Passarge et Hofmann (1968) Table 7h (also Schmidt (2002) 8.3.2, Table 2/7/1.1; Oberdorfer (1992) Vol IV, Table 304/4a and Text Vol. p. 147; Tüxen (1937) p. 149; Matuszkiewicz et Borowik (1957) Table 1; Langguth, Kopp et Passarge (1965) Table 3/5; Ellenberg et Klötzli 1972 p. 674; Schmider et Burnand 1988 p. 111; Chytry et al. 2013 tab. 5/8 p. 183+205; Niemeyer et al. 2010 p. 30; Hofmann et Pommer 2013 p. 180; Schubert 2001 p. 37) | | | | | | | | | | | | | | | | | | | | | | 313 | | | |
| 2. T1213, T12 - Alnus glutinosa-Alnus incana forest on riparian and mineral soils | | | | | | | | | | | | | | | | | | | | | |
| **Possible climate classes** | | | | | | | | | | | | | | | | | | | | | | | | | | | | | |
| 06 | 07 | 14 | 15 | | 16 | 17 | 23 | | | 24 | 25 | | 26 | | 27 | 31 | 32 | 33 | | 34 | | | 35 | 36 | 37 | | | 41 | 42 |
| 43 | 44 | 45 | 46 | | 47 | 51 | 52 | | | 53 | 54 | | 55 | | 56 | 57 | 60 | 61 | | 62 | | | 63 | 64 | 65 | | | 66 | 67 |
| **Typical site forms according to Benning et al. (2015)** | | | | | | | | | | | | | | | | | | | | | | | | | | | | | |
| **Water budget levels** | | | | | | | | | **Trophy levels** | | | | | | | | | | **Relief/ Exposition** | | | | | | | | | | |
| G2 | | | | | | | | | mo, e | | | | | | | | | | Plane, Shady slope, Sunny slope | | | | | | | | | | |
| **Typical community parameter ranges** | | | | | | | | | | | | | | | | | | | | | | | | | | | | | |
| **Lower limit (fuzzy)** | | | | | | **Lower limit of optimum** | | | | | | | | | **Upper limit of optimum** | | | | | | | | **Upper limit (fuzzy)** | | | | | | |
| **Base saturation (according to Kappen-Adrian) [%]** | | | | | | | | | | | | | | | | | | | | | | | | | | | | | |
| 23 | | | | | | 35 | | | | | | | | | 88 | | | | | | | | 100 | | | | | | |
| **pHH2O [-]** | | | | | | | | | | | | | | | | | | | | | | | | | | | | | |
| 4.5 | | | | | | 4.9 | | | | | | | | | 6.7 | | | | | | | | >7 | | | | | | |
| **C/N ratio in humus and 10 cm mineral soil layer [%C/%N]** | | | | | | | | | | | | | | | | | | | | | | | | | | | | | |
| 10 | | | | | | 13 | | | | | | | | | 25 | | | | | | | | 28 | | | | | | |
| **Volumetric water content in the rooted soil layer [%]** | | | | | | | | | | | | | | | | | | | | | | | | | | | | | |
| 16 | | | | | | 32 | | | | | | | | | 55 | | | | | | | | 58 | | | | | | |
| **Growing season length [d>10°TMT/a]** | | | | | | | | | | | | | | | | | | | | | | | | | | | | | |
| 110 | | | | | | 128 | | | | | | | | | 202 | | | | | | | | 220 | | | | | | |
| **Climatic water balance per vegetation month [mm/Veg.-Mon.]** | | | | | | | | | | | | | | | | | | | | | | | | | | | | | |
| -46 | | | | | | -35 | | | | | | | | | 90 | | | | | | | | 117 | | | | | | |
| **Solar radiation (PAR) in the growing season [kWh m-2 a-1]** | | | | | | | | | | | | **Lower limit (fuzzy)** | | | | | | | | | **Upper limit (fuzzy)** | | | | | | | | |
| 302 | | | | | | | | | 791 | | | | | | | | |
| **Lowest frost hardiness of all characteristic tree and shrub species (max. average annual low temperature) [°C]** | | | | | | | | | | | | | | | | | | | | | | | | | | | -28 | | |
| **Natural/near-natural combination of species** | | | | | | | | | | | | | | | | | | | | | | | | | | | | | |
| **Species** | | | | | | | | **Areal fraction [%]** | | | | | | **Species (english)** | | | | | | | | **Structural element** | | | | | | | |
| Alnus glutinosa | | | | | | | | 40 | | | | | | Common alder | | | | | | | | Main tree species 2 | | | | | | | |
| Fraxinus excelsior | | | | | | | | 40 | | | | | | Common ash | | | | | | | | Main tree species 1 | | | | | | | |
| Acer pseudoplatanus | | | | | | | | 20 | | | | | | Golden sycamore | | | | | | | | Secondary tree species | | | | | | | |
| Carex remota | | | | | | | | 40 | | | | | | Remote sedge | | | | | | | | Dominant herb species | | | | | | | |
| Juncus effusus | | | | | | | | 5 | | | | | | Soft rush | | | | | | | | Dominant herb species | | | | | | | |
| Ranunculus repens | | | | | | | | 10 | | | | | | Creeping crowfoot | | | | | | | | Dominant herb species | | | | | | | |
| Chrysosplenium oppositifolium | | | | | | | | 10 | | | | | | Opposite-leaved spleenwort | | | | | | | | Dominant herb species | | | | | | | |
| Viburnum opulus | | | | | | | | 20 | | | | | | Snowball bush | | | | | | | | Upper tree/shrub layer | | | | | | | |
| Corylus avellana | | | | | | | | 5 | | | | | | Hazel | | | | | | | | Upper tree/shrub layer | | | | | | | |
| Rubus idaeus | | | | | | | | 5 | | | | | | Raspberry | | | | | | | | Upper tree/shrub layer | | | | | | | |

# **Carici-Fagetum sylvatici typicum MOOR 1952 em. LOHMEYER 1953**

| **Synonym** | | | | | | **1.Sources of the community relevées** | | | | | | | | | | | | | | | | | | | | **No. of relevées** | | | |
| --- | --- | --- | --- | --- | --- | --- | --- | --- | --- | --- | --- | --- | --- | --- | --- | --- | --- | --- | --- | --- | --- | --- | --- | --- | --- | --- | --- | --- | --- |
| **2. EUNIS-Code, mapped EUNIS class** | | | | | | | | | | | | | | | | | | | |
| White sedge-Beech forest (typ. subass.) | | | | | | 1. Hartmann et Jahn (1967) Table VIIa 30, Table 18b/9-12, p. 462 (also Berg et al 2001 Table 34.2.3.1 and Text p. 489; Willner et Grabherr (2007) Table 21a/1; Ellenberg et Klötzli 1972 p. 648; Schmider et Burnand 1988 p. 74; Niemeyer et al. 2010 p. 47) | | | | | | | | | | | | | | | | | | | | 841 | | | |
| 2. T174, T17 - Fagus forest on non-acid soils | | | | | | | | | | | | | | | | | | | |
| **Possible climate classes** | | | | | | | | | | | | | | | | | | | | | | | | | | | | | |
| 06 | 07 | 14 | 15 | 16 | | | 17 | 23 | | 24 | 25 | | | 26 | 27 | 31 | 32 | 33 | | | 34 | | 35 | 36 | 37 | | | 41 | 42 |
| 43 | 44 | 45 | 46 | 47 | | | 51 | 52 | | 53 | 54 | | | 55 | 56 | 57 | 60 | 61 | | | 62 | | 63 | 64 | 65 | | | 66 | 67 |
| **Typical site forms according to Benning et al. (2015)** | | | | | | | | | | | | | | | | | | | | | | | | | | | | | |
| **Water budget levels** | | | | | | | | | **Trophy levels** | | | | | | | | | | | **Relief/ Exposition** | | | | | | | | | |
| T1, T2, T3, T4, T5 | | | | | | | | | e | | | | | | | | | | | Plane, Shady slope, Sunny slope | | | | | | | | | |
| **Typical community parameter ranges** | | | | | | | | | | | | | | | | | | | | | | | | | | | | | |
| **Lower limit (fuzzy)** | | | | | | | **Lower limit of optimum** | | | | | | | | **Upper limit of optimum** | | | | | | | | **Upper limit (fuzzy)** | | | | | | |
| **Base saturation (according to Kappen-Adrian) [%]** | | | | | | | | | | | | | | | | | | | | | | | | | | | | | |
| 35 | | | | | | | 48 | | | | | | | | 100 | | | | | | | | 100 | | | | | | |
| **pHH2O [-]** | | | | | | | | | | | | | | | | | | | | | | | | | | | | | |
| 5.7 | | | | | | | 6.2 | | | | | | | | 7.0 | | | | | | | | 8 | | | | | | |
| **C/N ratio in humus and 10 cm mineral soil layer [%C/%N]** | | | | | | | | | | | | | | | | | | | | | | | | | | | | | |
| 12 | | | | | | | 14 | | | | | | | | 20 | | | | | | | | 22 | | | | | | |
| **Volumetric water content in the rooted soil layer [%]** | | | | | | | | | | | | | | | | | | | | | | | | | | | | | |
| 8 | | | | | | | 11 | | | | | | | | 21 | | | | | | | | 23 | | | | | | |
| **Growing season length [d>10°TMT/a]** | | | | | | | | | | | | | | | | | | | | | | | | | | | | | |
| 145 | | | | | | | 149 | | | | | | | | 166 | | | | | | | | 170 | | | | | | |
| **Climatic water balance per vegetation month [mm/Veg.-Mon.]** | | | | | | | | | | | | | | | | | | | | | | | | | | | | | |
| -22 | | | | | | | -13 | | | | | | | | 55 | | | | | | | | 59 | | | | | | |
| **Solar radiation (PAR) in the growing season [kWh m-2 a-1]** | | | | | | | | | | | | | **Lower limit (fuzzy)** | | | | | | | | | **Upper limit (fuzzy)** | | | | | | | |
| 362 | | | | | | | | | 683 | | | | | | | |
| **Lowest frost hardiness of all characteristic tree and shrub species (max. average annual low temperature) [°C]** | | | | | | | | | | | | | | | | | | | | | | | | | | | -20 | | |
| **Natural/near-natural combination of species** | | | | | | | | | | | | | | | | | | | | | | | | | | | | | |
| **Species** | | | | | **Areal fraction [%]** | | | | | | | **Species (english)** | | | | | | | **Structural element** | | | | | | | | | | |
| Fagus sylvatica | | | | | 80 | | | | | | | European beech | | | | | | | Main tree species 1 | | | | | | | | | | |
| Acer campestre | | | | | 5 | | | | | | | Hedge maple | | | | | | | Mixed tree species | | | | | | | | | | |
| Sorbus torminalis | | | | | 5 | | | | | | | Service tree | | | | | | | Intermediate tree layer | | | | | | | | | | |
| Daphne mezereum | | | | | 2 | | | | | | | Mezereum | | | | | | | Upper tree/shrub layer | | | | | | | | | | |
| Mercurialis perennis | | | | | 40 | | | | | | | Dog mercury | | | | | | | Dominant herb species | | | | | | | | | | |
| Dicranum viride | | | | | 2 | | | | | | | Green broom moss | | | | | | | Dominant moss species | | | | | | | | | | |
| Taxus baccata | | | | | 5 | | | | | | | European yew | | | | | | | Intermediate tree layer | | | | | | | | | | |
| Crataegus laevigata | | | | | 10 | | | | | | | Midland hawthorn | | | | | | | Intermediate tree layer | | | | | | | | | | |
| Cornus sanguinea | | | | | 5 | | | | | | | Bloodtwig dogwood | | | | | | | Upper tree/shrub layer | | | | | | | | | | |

# **Carpino orientalis-Quercetum cerridis KLIKA 1938**

| **Synonym** | | | | **1.Sources of the community relevées** | | | | | | | | | | | | | | | | | | | | | **No. of relevées** | | | |
| --- | --- | --- | --- | --- | --- | --- | --- | --- | --- | --- | --- | --- | --- | --- | --- | --- | --- | --- | --- | --- | --- | --- | --- | --- | --- | --- | --- | --- |
| **2. EUNIS-Code, mapped EUNIS class** | | | | | | | | | | | | | | | | | | | | |
| Oriental hornbeam - Downy oak forest | | | | 1. Blasi et al. 2020 Tab. 5/17 (also: Blasi 1984 Tab.1; Donita et al. 2008) | | | | | | | | | | | | | | | | | | | | | 67 | | | |
| 2. T1941, T1941 - Northern Italian Quercus cerris forests | | | | | | | | | | | | | | | | | | | | |
| **Possible climate classes** | | | | | | | | | | | | | | | | | | | | | | | | | | | | |
| 06 | 07 | 14 | 15 | | 16 | | 17 | 23 | | 24 | 25 | | 26 | 27 | 31 | 32 | 33 | | | 34 | | 35 | 36 | 37 | | | 41 | 42 |
| 43 | 44 | 45 | 46 | | 47 | | 51 | 52 | | 53 | 54 | | 55 | 56 | 57 | 60 | 61 | | | 62 | | 63 | 64 | 65 | | | 66 | 67 |
| **Typical site forms according to Benning et al. (2015)** | | | | | | | | | | | | | | | | | | | | | | | | | | | | |
| **Water budget levels** | | | | | | | | | **Trophy levels** | | | | | | | | | **Relief/ Exposition** | | | | | | | | | | |
| S0, S1, S2 | | | | | | | | | e, mo | | | | | | | | | Plane, Shady slope | | | | | | | | | | |
| **Typical community parameter ranges** | | | | | | | | | | | | | | | | | | | | | | | | | | | | |
| **Lower limit (fuzzy)** | | | | | | | **Lower limit of optimum** | | | | | | | **Upper limit of optimum** | | | | | | | | **Upper limit (fuzzy)** | | | | | | |
| **Base saturation (according to Kappen-Adrian) [%]** | | | | | | | | | | | | | | | | | | | | | | | | | | | | |
| 28 | | | | | | | 42 | | | | | | | 86 | | | | | | | | 100 | | | | | | |
| **pHH2O [-]** | | | | | | | | | | | | | | | | | | | | | | | | | | | | |
| 5 | | | | | | | 5.4 | | | | | | | 6.6 | | | | | | | | 7 | | | | | | |
| **C/N ratio in humus and 10 cm mineral soil layer [%C/%N]** | | | | | | | | | | | | | | | | | | | | | | | | | | | | |
| 15 | | | | | | | 16 | | | | | | | 21 | | | | | | | | 22 | | | | | | |
| **Volumetric water content in the rooted soil layer [%]** | | | | | | | | | | | | | | | | | | | | | | | | | | | | |
| 8 | | | | | | | 16 | | | | | | | 21 | | | | | | | | 22 | | | | | | |
| **Growing season length [d>10°TMT/a]** | | | | | | | | | | | | | | | | | | | | | | | | | | | | |
| 220 | | | | | | | 225 | | | | | | | 245 | | | | | | | | 250 | | | | | | |
| **Climatic water balance per vegetation month [mm/Veg.-Mon.]** | | | | | | | | | | | | | | | | | | | | | | | | | | | | |
| -32 | | | | | | | -15 | | | | | | | 65 | | | | | | | | 70 | | | | | | |
| **Lowest frost hardiness of all characteristic tree and shrub species (max. average annual low temperature) [°C]** | | | | | | | | | | | | | | | | | | | | | | | | | | -16 | | |
| **Solar radiation (PAR) in the growing season [kWh m-2 a-1]** | | | | | | | | | | | | **Lower limit (fuzzy)** | | | | | | | | | **Upper limit (fuzzy)** | | | | | | | |
| 755 | | | | | | | | | 946 | | | | | | | |
| **Natural/near-natural combination of species** | | | | | | | | | | | | | | | | | | | | | | | | | | | | |
| **Species** | | | | | | **Areal fraction [%]** | | | | | | **Species (english)** | | | | | | | **Structural element** | | | | | | | | | |
| Acer campestre | | | | | | 5 | | | | | | Hedge maple | | | | | | | Mixed tree species | | | | | | | | | |
| Quercus cerris | | | | | | 70 | | | | | | Turkey oak | | | | | | | Main tree species 1 | | | | | | | | | |
| Carpinus orientalis | | | | | | 2 | | | | | | Orient hornbeam | | | | | | | Secondary tree species | | | | | | | | | |
| Melica uniflora | | | | | | 20 | | | | | | Wood melick | | | | | | | Dominant herb species | | | | | | | | | |
| Ruscus aculeatus | | | | | | 2 | | | | | | Butcher’s broom | | | | | | | Upper tree/shrub layer | | | | | | | | | |
| Rubus ulmifolius | | | | | | 5 | | | | | | Elm leaf blackberry | | | | | | | Upper tree/shrub layer | | | | | | | | | |
| Crataegus monogyna | | | | | | 5 | | | | | | Common hawthorn | | | | | | | Intermediate tree layer | | | | | | | | | |
| Ligustrum vulgare | | | | | | 2 | | | | | | European privet | | | | | | | Upper tree/shrub layer | | | | | | | | | |

# **Castaneo-Fagetum sylvatici MARINCEK 1980**

| **Synonym** | | | | | | | | | | | | | **1.Sources of the community relevées** | | | | | | | | | | | | **No. of relevées** | | | |
| --- | --- | --- | --- | --- | --- | --- | --- | --- | --- | --- | --- | --- | --- | --- | --- | --- | --- | --- | --- | --- | --- | --- | --- | --- | --- | --- | --- | --- |
| **2. EUNIS-Code, mapped EUNIS class** | | | | | | | | | | | |
| Sweet chestnut-Beech forest  Hieracio rotundatae-Fagetum Kosir 1994; Epimedio-Luzulo-Fagetum Marincek 1980; Blechno-Fagetum Rivas-Martínez 1962 | | | | | | | | | | | | | 1. Willner (2002) Tab. 6/41 | | | | | | | | | | | | 111 | | | |
| 2. T19C8, T19C-Castanea sativa forest | | | | | | | | | | | |
| **Possible climate classes** | | | | | | | | | | | | | | | | | | | | | | | | | | | | |
| 06 | 07 | 14 | 15 | 16 | | 17 | 23 | | 24 | 25 | | | 26 | 27 | 31 | 32 | | 33 | | 34 | | 35 | 36 | 37 | | | 41 | 42 |
| 43 | 44 | 45 | 46 | 47 | | 51 | 52 | | 53 | 54 | | | 55 | 56 | 57 | 60 | | 61 | | 62 | | 63 | 64 | 65 | | | 66 | 67 |
| **Typical site forms according to Benning et al. (2015)** | | | | | | | | | | | | | | | | | | | | | | | | | | | | |
| **Water budget levels** | | | | | | | | **Trophy levels** | | | | | | | | | **Relief/ Exposition** | | | | | | | | | | | |
| T3, T4, S2 | | | | | | | | o | | | | | | | | | Plane, Shady slope, Sunny slope | | | | | | | | | | | |
| **Typical community parameter ranges** | | | | | | | | | | | | | | | | | | | | | | | | | | | | |
| **Lower limit (fuzzy)** | | | | | | **Lower limit of optimum** | | | | | | | | **Upper limit of optimum** | | | | | | | | **Upper limit (fuzzy)** | | | | | | |
| **Base saturation (according to Kappen-Adrian) [%]** | | | | | | | | | | | | | | | | | | | | | | | | | | | | |
| 5 | | | | | | 10 | | | | | | | | 28 | | | | | | | | 32 | | | | | | |
| **pHH2O [-]** | | | | | | | | | | | | | | | | | | | | | | | | | | | | |
| 3.2 | | | | | | 3.6 | | | | | | | | 5.0 | | | | | | | | 5.4 | | | | | | |
| **C/N ratio in humus and 10 cm mineral soil layer [%C/%N]** | | | | | | | | | | | | | | | | | | | | | | | | | | | | |
| 15 | | | | | | 18 | | | | | | | | 28 | | | | | | | | 31 | | | | | | |
| **Volumetric water content in the rooted soil layer [%]** | | | | | | | | | | | | | | | | | | | | | | | | | | | | |
| 7 | | | | | | 10 | | | | | | | | 23 | | | | | | | | 26 | | | | | | |
| **Growing season length [d>10°TMT/a]** | | | | | | | | | | | | | | | | | | | | | | | | | | | | |
| 175 | | | | | | 183 | | | | | | | | 213 | | | | | | | | 220 | | | | | | |
| **Climatic water balance per vegetation month [mm/Veg.-Mon.]** | | | | | | | | | | | | | | | | | | | | | | | | | | | | |
| -22 | | | | | | -7 | | | | | | | | 65 | | | | | | | | 70 | | | | | | |
| **Solar radiation (PAR) in the growing season [kWh m-2 a-1]** | | | | | | | | | | | | **Lower limit (fuzzy)** | | | | | | | | | **Upper limit (fuzzy)** | | | | | | | |
| 520 | | | | | | | | | 956 | | | | | | | |
| **Lowest frost hardiness of all characteristic tree and shrub species (max. average annual low temperature) [°C]** | | | | | | | | | | | | | | | | | | | | | | | | | | -20 | | |
| **Natural/near-natural combination of species** | | | | | | | | | | | | | | | | | | | | | | | | | | | | |
| **Species** | | | | | **Areal fraction [%]** | | | | | | **Species (english)** | | | | | | | | **Structural element** | | | | | | | | | |
| Fagus sylvatica | | | | | 60 | | | | | | European beech | | | | | | | | Main tree species 1 | | | | | | | | | |
| Quercus petraea | | | | | 10 | | | | | | Sessile oak | | | | | | | | Mixed tree species | | | | | | | | | |
| Castanea sativa | | | | | 30 | | | | | | Chestnut | | | | | | | | Main tree species 2 | | | | | | | | | |
| Avenella flexuosa | | | | | 10 | | | | | | Wavy hairgrass | | | | | | | | Dominant herb species | | | | | | | | | |
| Pteridium aquilinum | | | | | 10 | | | | | | Bracken | | | | | | | | Dominant herb species | | | | | | | | | |
| Vaccinium myrtillus | | | | | 10 | | | | | | Blueberry | | | | | | | | Dominant herb species | | | | | | | | | |
| Polytrichum formosum | | | | | 5 | | | | | | Beauty haircap moss | | | | | | | | Dominant moss species | | | | | | | | | |

# **Castaneo-Quercetum petraea HORVÁT 1963**

| **Synonym** | | | | | | | | | **1.Sources of the community relevées** | | | | | | | | | | | | | | | | | **No. of relevées** | | | |
| --- | --- | --- | --- | --- | --- | --- | --- | --- | --- | --- | --- | --- | --- | --- | --- | --- | --- | --- | --- | --- | --- | --- | --- | --- | --- | --- | --- | --- | --- |
| **2. EUNIS-Code, mapped EUNIS class** | | | | | | | | | | | | | | | | |
| Chestnut-Sessile oak forest  Luzulo forsteri-Quercetum petraea Borhidi et Kevey 1996 | | | | | | | | | 1. Kevey et Borhidi (2005) Table 2 (also: Soó 1964b p. 261) | | | | | | | | | | | | | | | | | 30 | | | |
| 2. T1B7331, T1B7 - Medio-European acidophilous Quercus forests | | | | | | | | | | | | | | | | |
| **Possible climate classes** | | | | | | | | | | | | | | | | | | | | | | | | | | | | | |
| 06 | 07 | 14 | 15 | 16 | | 17 | 23 | | | 24 | 25 | | | 26 | 27 | 31 | 32 | 33 | | | 34 | | 35 | 36 | 37 | | | 41 | 42 |
| 43 | 44 | 45 | 46 | 47 | | 51 | 52 | | | 53 | 54 | | | 55 | 56 | 57 | 60 | 61 | | | 62 | | 63 | 64 | 65 | | | 66 | 67 |
| **Typical site forms according to Benning et al. (2015)** | | | | | | | | | | | | | | | | | | | | | | | | | | | | | |
| **Water budget levels** | | | | | | | | **Trophy levels** | | | | | | | | | | | | **Relief/ Exposition** | | | | | | | | | |
| T1, T2 | | | | | | | | o | | | | | | | | | | | | Plane, Shady slope | | | | | | | | | |
| **Typical community parameter ranges** | | | | | | | | | | | | | | | | | | | | | | | | | | | | | |
| **Lower limit (fuzzy)** | | | | | | **Lower limit of optimum** | | | | | | | | | **Upper limit of optimum** | | | | | | | | **Upper limit (fuzzy)** | | | | | | |
| **Base saturation (according to Kappen-Adrian) [%]** | | | | | | | | | | | | | | | | | | | | | | | | | | | | | |
| 5 | | | | | | 9 | | | | | | | | | 29 | | | | | | | | 32 | | | | | | |
| **pHH2O [-]** | | | | | | | | | | | | | | | | | | | | | | | | | | | | | |
| 3.2 | | | | | | 3.4 | | | | | | | | | 5.12 | | | | | | | | 5.4 | | | | | | |
| **C/N ratio in humus and 10 cm mineral soil layer [%C/%N]** | | | | | | | | | | | | | | | | | | | | | | | | | | | | | |
| 22 | | | | | | 23 | | | | | | | | | 28 | | | | | | | | 31 | | | | | | |
| **Volumetric water content in the rooted soil layer [%]** | | | | | | | | | | | | | | | | | | | | | | | | | | | | | |
| 7 | | | | | | 9 | | | | | | | | | 16 | | | | | | | | 18 | | | | | | |
| **Growing season length [d>10°TMT/a]** | | | | | | | | | | | | | | | | | | | | | | | | | | | | | |
| 175 | | | | | | 184 | | | | | | | | | 211 | | | | | | | | 220 | | | | | | |
| **Climatic water balance per vegetation month [mm/Veg.-Mon.]** | | | | | | | | | | | | | | | | | | | | | | | | | | | | | |
| -22 | | | | | | -11 | | | | | | | | | 24 | | | | | | | | 35 | | | | | | |
| **Solar radiation (PAR) in the growing season [kWh m-2 a-1]** | | | | | | | | | | | | | **Lower limit (fuzzy)** | | | | | | | | | **Upper limit (fuzzy)** | | | | | | | |
| 621 | | | | | | | | | 719 | | | | | | | |
| **Lowest frost hardiness of all characteristic tree and shrub species (max. average annual low temperature) [°C]** | | | | | | | | | | | | | | | | | | | | | | | | | | | -16 | | |
| **Natural/near-natural combination of species** | | | | | | | | | | | | | | | | | | | | | | | | | | | | | |
| **Species** | | | | | **Areal fraction [%]** | | | | | | | **Species (english)** | | | | | | | **Structural element** | | | | | | | | | | |
| Quercus petraea | | | | | 50 | | | | | | | Sessile oak | | | | | | | Main tree species 1 | | | | | | | | | | |
| Quercus dalechampii | | | | | 10 | | | | | | | Dalechamps oak | | | | | | | Mixed tree species | | | | | | | | | | |
| Fagus sylvatica | | | | | 10 | | | | | | | European beech | | | | | | | Secondary tree species | | | | | | | | | | |
| Fraxinus ornus | | | | | 10 | | | | | | | Manna ash | | | | | | | Intermediate tree layer | | | | | | | | | | |
| Quercus cerris | | | | | 5 | | | | | | | Turkey oak | | | | | | | Secondary tree species | | | | | | | | | | |
| Castanea sativa | | | | | 30 | | | | | | | Chestnut | | | | | | | Main tree species 2 | | | | | | | | | | |
| Luzula luzuloides | | | | | 40 | | | | | | | Snow-white woodrush | | | | | | | Dominant herb species | | | | | | | | | | |
| Cytisus supinus | | | | | 5 | | | | | | | Dwarf broom head | | | | | | | Upper tree/shrub layer | | | | | | | | | | |

# **Cephalanthero rubrae-Quercetum fagineae RIVAS-MARTINEZ in RIVAS GODAY et al. 1959**

| **Synonym** | | | | | | | | | **1.Sources of the community relevées** | | | | | | | | | | | | | | | | | **No. of relevées** | | | |
| --- | --- | --- | --- | --- | --- | --- | --- | --- | --- | --- | --- | --- | --- | --- | --- | --- | --- | --- | --- | --- | --- | --- | --- | --- | --- | --- | --- | --- | --- |
| **2. EUNIS-Code, mapped EUNIS class** | | | | | | | | | | | | | | | | |
| Helleborine-Cenne oak forest | | | | | | | | | 1. Loidi et Herrera 1990 Tab. 3/1 (also Alonso 2024 Tab. 2 ; Cantorala et al. 2022 fig. 3; Lopez 1976 Tab. 20 p.68) | | | | | | | | | | | | | | | | | 41 | | | |
| 2. T1971 - Spanish Quercus faginea forests | | | | | | | | | | | | | | | | |
| **Possible climate classes** | | | | | | | | | | | | | | | | | | | | | | | | | | | | | |
| 06 | 07 | 14 | 15 | 16 | | 17 | 23 | | | 24 | 25 | | | 26 | 27 | 31 | 32 | 33 | | | 34 | | 35 | 36 | 37 | | | 41 | 42 |
| 43 | 44 | 45 | 46 | 47 | | 51 | 52 | | | 53 | 54 | | | 55 | 56 | 57 | 60 | 61 | | | 62 | | 63 | 64 | 65 | | | 66 | 67 |
| **Typical site forms according to Benning et al. (2015)** | | | | | | | | | | | | | | | | | | | | | | | | | | | | | |
| **Water budget levels** | | | | | | | | **Trophy levels** | | | | | | | | | | | **Relief/ Exposition** | | | | | | | | | | |
| T2, T3, T4, T5 | | | | | | | | e | | | | | | | | | | | Plane, Shady slope, Sunny slope | | | | | | | | | | |
| **Typical community parameter ranges** | | | | | | | | | | | | | | | | | | | | | | | | | | | | | |
| **Lower limit (fuzzy)** | | | | | | **Lower limit of optimum** | | | | | | | | | **Upper limit of optimum** | | | | | | | | **Upper limit (fuzzy)** | | | | | | |
| **Base saturation (according to Kappen-Adrian) [%]** | | | | | | | | | | | | | | | | | | | | | | | | | | | | | |
| 35 | | | | | | 35 | | | | | | | | | 100 | | | | | | | | 100 | | | | | | |
| **pHH2O [-]** | | | | | | | | | | | | | | | | | | | | | | | | | | | | | |
| 5.7 | | | | | | 5.7 | | | | | | | | | 8.0 | | | | | | | | 8 | | | | | | |
| **C/N ratio in humus and 10 cm mineral soil layer [%C/%N]** | | | | | | | | | | | | | | | | | | | | | | | | | | | | | |
| 15 | | | | | | 15 | | | | | | | | | 26 | | | | | | | | 26 | | | | | | |
| **Volumetric water content in the rooted soil layer [%]** | | | | | | | | | | | | | | | | | | | | | | | | | | | | | |
| 12 | | | | | | 12 | | | | | | | | | 19 | | | | | | | | 19 | | | | | | |
| **Growing season length [d>10°TMT/a]** | | | | | | | | | | | | | | | | | | | | | | | | | | | | | |
| 180 | | | | | | 180 | | | | | | | | | 260 | | | | | | | | 260 | | | | | | |
| **Climatic water balance per vegetation month [mm/Veg.-Mon.]** | | | | | | | | | | | | | | | | | | | | | | | | | | | | | |
| -17 | | | | | | -17 | | | | | | | | | 69 | | | | | | | | 70 | | | | | | |
| **Solar radiation (PAR) in the growing season [kWh m-2 a-1]** | | | | | | | | | | | | | **Lower limit (fuzzy)** | | | | | | | | | **Upper limit (fuzzy)** | | | | | | | |
| 961 | | | | | | | | | 1153 | | | | | | | |
| **Lowest frost hardiness of all characteristic tree and shrub species (max. average annual low temperature) [°C]** | | | | | | | | | | | | | | | | | | | | | | | | | | | -18 | | |
| **Natural/near-natural combination of species** | | | | | | | | | | | | | | | | | | | | | | | | | | | | | |
| **Species** | | | | | **Areal fraction [%]** | | | | | | | **Species (english)** | | | | | | | | **Structural element** | | | | | | | | | |
| Quercus faginea | | | | | 75 | | | | | | | Cenne oak | | | | | | | | Main tree species 1 | | | | | | | | | |
| Amelanchier ovalis | | | | | 10 | | | | | | | Snowy mespilus | | | | | | | | Intermediate tree layer | | | | | | | | | |
| Cephalanthera rubra | | | | | 2 | | | | | | | Red helleborine | | | | | | | | Character herb species | | | | | | | | | |
| Crataegus monogyna | | | | | 2 | | | | | | | Common hawthorn | | | | | | | | Intermediate tree layer | | | | | | | | | |
| Viburnum lantana | | | | | 10 | | | | | | | Wayfaring tree | | | | | | | | Upper tree/shrub layer | | | | | | | | | |

# **Cephalanthero-Fagetum sylvatici typicum HOFMANN 1956**

| **Synonym** | | | | **1.Sources of the community relevées** | | | | | | | | | | | | | | | | | | | | | | **No. of relevées** | | | |
| --- | --- | --- | --- | --- | --- | --- | --- | --- | --- | --- | --- | --- | --- | --- | --- | --- | --- | --- | --- | --- | --- | --- | --- | --- | --- | --- | --- | --- | --- |
| **2. EUNIS-Code, mapped EUNIS class** | | | | | | | | | | | | | | | | | | | | | |
| Helleborine-Beech forest | | | | 1. Hartmann et Jahn (1967) Table VIIa/26 (also: Chytry et al. 2013 tab. 6/10 p. 237+264; Hofmann et Pommer 2013 p. 374; Schubert 2001 p. 56) | | | | | | | | | | | | | | | | | | | | | | 74 | | | |
| 2. T171 - Medio-European neutrophile Fagus forests | | | | | | | | | | | | | | | | | | | | | |
| **Possible climate classes** | | | | | | | | | | | | | | | | | | | | | | | | | | | | | |
| 06 | 07 | 14 | 15 | | 16 | | 17 | 23 | | 24 | | 25 | | 26 | 27 | 31 | 32 | | 33 | | 34 | | 35 | 36 | 37 | | | 41 | 42 |
| 43 | 44 | 45 | 46 | | 47 | | 51 | 52 | | 53 | | 54 | | 55 | 56 | 57 | 60 | | 61 | | 62 | | 63 | 64 | 65 | | | 66 | 67 |
| **Typical site forms according to Benning et al. (2015)** | | | | | | | | | | | | | | | | | | | | | | | | | | | | | |
| **Water budget levels** | | | | | | | | | **Trophy levels** | | | | | | | | | **Relief/ Exposition** | | | | | | | | | | | |
| T1, T2, T3, T4, T5 | | | | | | | | | e | | | | | | | | | Plane, Shady slope, Sunny slope | | | | | | | | | | | |
| **Typical community parameter ranges** | | | | | | | | | | | | | | | | | | | | | | | | | | | | | |
| **Lower limit (fuzzy)** | | | | | | | **Lower limit of optimum** | | | | | | | | **Upper limit of optimum** | | | | | | | | **Upper limit (fuzzy)** | | | | | | |
| **Base saturation (according to Kappen-Adrian) [%]** | | | | | | | | | | | | | | | | | | | | | | | | | | | | | |
| 29 | | | | | | | 29 | | | | | | | | 100 | | | | | | | | 100 | | | | | | |
| **pHH2O [-]** | | | | | | | | | | | | | | | | | | | | | | | | | | | | | |
| 5.1 | | | | | | | 5.1 | | | | | | | | 8.0 | | | | | | | | 8 | | | | | | |
| **C/N ratio in humus and 10 cm mineral soil layer [%C/%N]** | | | | | | | | | | | | | | | | | | | | | | | | | | | | | |
| 15 | | | | | | | 15 | | | | | | | | 22 | | | | | | | | 22 | | | | | | |
| **Volumetric water content in the rooted soil layer [%]** | | | | | | | | | | | | | | | | | | | | | | | | | | | | | |
| 24 | | | | | | | 24 | | | | | | | | 28 | | | | | | | | 28 | | | | | | |
| **Growing season length [d>10°TMT/a]** | | | | | | | | | | | | | | | | | | | | | | | | | | | | | |
| 125 | | | | | | | 125 | | | | | | | | 190 | | | | | | | | 190 | | | | | | |
| **Climatic water balance per vegetation month [mm/Veg.-Mon.]** | | | | | | | | | | | | | | | | | | | | | | | | | | | | | |
| -22 | | | | | | | -22 | | | | | | | | 59 | | | | | | | | 59 | | | | | | |
| **Solar radiation (PAR) in the growing season [kWh m-2 a-1]** | | | | | | | | | | | | | **Lower limit (fuzzy)** | | | | | | | | | **Upper limit (fuzzy)** | | | | | | | |
| 400 | | | | | | | | | 583 | | | | | | | |
| **Lowest frost hardiness of all characteristic tree and shrub species (max. average annual low temperature) [°C]** | | | | | | | | | | | | | | | | | | | | | | | | | | | -20 | | |
| **Natural/near-natural combination of species** | | | | | | | | | | | | | | | | | | | | | | | | | | | | | |
| **Species** | | | | | | **Areal fraction [%]** | | | | | **Species (english)** | | | | | | | | | **Structural element** | | | | | | | | | |
| Fagus sylvatica | | | | | | 80 | | | | | European beech | | | | | | | | | Main tree species 1 | | | | | | | | | |
| Sorbus aria | | | | | | 5 | | | | | Common whitebeam | | | | | | | | | Intermediate tree layer | | | | | | | | | |
| Acer pseudoplatanus | | | | | | 2 | | | | | Golden sycamore | | | | | | | | | Mixed tree species | | | | | | | | | |
| Acer campestre | | | | | | 15 | | | | | Hedge maple | | | | | | | | | Main tree species 2 | | | | | | | | | |
| Convallaria majalis | | | | | | 5 | | | | | Lily of the valley | | | | | | | | | Dominant herb species | | | | | | | | | |
| Hepatica nobilis | | | | | | 5 | | | | | Hepatica | | | | | | | | | Dominant herb species | | | | | | | | | |
| Mercurialis perennis | | | | | | 5 | | | | | Dog mercury | | | | | | | | | Dominant herb species | | | | | | | | | |
| Cephalanthera rubra | | | | | | 1 | | | | | Red helleborine | | | | | | | | | Character herb species | | | | | | | | | |
| Cornus sanguinea | | | | | | 10 | | | | | Bloodtwig dogwood | | | | | | | | | Upper tree/shrub layer | | | | | | | | | |
| Crataegus monogyna | | | | | | 10 | | | | | Common hawthorn | | | | | | | | | Intermediate tree layer | | | | | | | | | |
| Viburnum opulus | | | | | | 5 | | | | | Snowball bush | | | | | | | | | Upper tree/shrub layer | | | | | | | | | |
| Crataegus laevigata | | | | | | 5 | | | | | Midland hawthorn | | | | | | | | | Intermediate tree layer | | | | | | | | | |

# **Circaeo-Alnetum glutinosae OBERDORFER 1953**

| **Synonym** | | | | | **1.Sources of the community relevées** | | | | | | | | | | | | | | | | | | | | | | **No. of relevées** | | | |
| --- | --- | --- | --- | --- | --- | --- | --- | --- | --- | --- | --- | --- | --- | --- | --- | --- | --- | --- | --- | --- | --- | --- | --- | --- | --- | --- | --- | --- | --- | --- |
| **2. EUNIS-Code, mapped EUNIS class** | | | | | | | | | | | | | | | | | | | | | |
| Witchweed-Black alder forest | | | | | 1. Matuszkiewicz et Borowik (1957) Tab. 1 et p. 140 | | | | | | | | | | | | | | | | | | | | | | 91 | | | |
| 2. T1213, T12 - Alnus glutinosa-Alnus incana forest on riparian and mineral soils | | | | | | | | | | | | | | | | | | | | | |
| **Possible climate classes** | | | | | | | | | | | | | | | | | | | | | | | | | | | | | | |
| 06 | 07 | 14 | 15 | 16 | | | 17 | 23 | | 24 | 25 | | | | 26 | 27 | 31 | 32 | 33 | | 34 | | | 35 | 36 | 37 | | | 41 | 42 |
| 43 | 44 | 45 | 46 | 47 | | | 51 | 52 | | 53 | 54 | | | | 55 | 56 | 57 | 60 | 61 | | 62 | | | 63 | 64 | 65 | | | 66 | 67 |
| **Typical site forms according to Benning et al. (2015)** | | | | | | | | | | | | | | | | | | | | | | | | | | | | | | |
| **Water budget levels** | | | | | | | | | **Trophy levels** | | | | | | | | | | | **Relief/ Exposition** | | | | | | | | | | |
| G4,G5 | | | | | | | | | e | | | | | | | | | | | Plane, Shady slope, Sunny slope | | | | | | | | | | |
| **Typical community parameter ranges** | | | | | | | | | | | | | | | | | | | | | | | | | | | | | | |
| **Lower limit (fuzzy)** | | | | | | | **Lower limit of optimum** | | | | | | | | | **Upper limit of optimum** | | | | | | | | **Upper limit (fuzzy)** | | | | | | |
| **Base saturation (according to Kappen-Adrian) [%]** | | | | | | | | | | | | | | | | | | | | | | | | | | | | | | |
| 26 | | | | | | | 38 | | | | | | | | | 88 | | | | | | | | 100 | | | | | | |
| **pHH2O [-]** | | | | | | | | | | | | | | | | | | | | | | | | | | | | | | |
| 4.8 | | | | | | | 5.2 | | | | | | | | | 6.6 | | | | | | | | >7 | | | | | | |
| **C/N ratio in humus and 10 cm mineral soil layer [%C/%N]** | | | | | | | | | | | | | | | | | | | | | | | | | | | | | | |
| 15 | | | | | | | 17 | | | | | | | | | 26 | | | | | | | | 28 | | | | | | |
| **Volumetric water content in the rooted soil layer [%]** | | | | | | | | | | | | | | | | | | | | | | | | | | | | | | |
| 16 | | | | | | | 43 | | | | | | | | | 55 | | | | | | | | 58 | | | | | | |
| **Growing season length [d>10°TMT/a]** | | | | | | | | | | | | | | | | | | | | | | | | | | | | | | |
| 110 | | | | | | | 123 | | | | | | | | | 177 | | | | | | | | 190 | | | | | | |
| **Climatic water balance per vegetation month [mm/Veg.-Mon.]** | | | | | | | | | | | | | | | | | | | | | | | | | | | | | | |
| -37 | | | | | | | -19 | | | | | | | | | 65 | | | | | | | | 70 | | | | | | |
| **Solar radiation (PAR) in the growing season [kWh m-2 a-1]** | | | | | | | | | | | | | | **Lower limit (fuzzy)** | | | | | | | | **Upper limit (fuzzy)** | | | | | | | | |
| 317 | | | | | | | | 480 | | | | | | | | |
| **Lowest frost hardiness of all characteristic tree and shrub species (max. average annual low temperature) [°C]** | | | | | | | | | | | | | | | | | | | | | | | | | | | | -26 | | |
| **Natural/near-natural combination of species** | | | | | | | | | | | | | | | | | | | | | | | | | | | | | | |
| **Species** | | | | | | **Areal fraction [%]** | | | | | | **Species (english)** | | | | | | | | | | | **Structural element** | | | | | | | |
| Quercus robur | | | | | | 5 | | | | | | Pedunculate oak | | | | | | | | | | | Secondary tree species | | | | | | | |
| Alnus glutinosa | | | | | | 60 | | | | | | Common alder | | | | | | | | | | | Main tree species 1 | | | | | | | |
| Fraxinus excelsior | | | | | | 30 | | | | | | Common ash | | | | | | | | | | | Main tree species 2 | | | | | | | |
| Carex remota | | | | | | 15 | | | | | | Remote sedge | | | | | | | | | | | Dominant herb species | | | | | | | |
| Anemone nemorosa | | | | | | 15 | | | | | | Wood anemone | | | | | | | | | | | Dominant herb species | | | | | | | |
| Equisetum sylvaticum | | | | | | 15 | | | | | | Woodland horsetail | | | | | | | | | | | Dominant herb species | | | | | | | |
| Circaea lutetiana | | | | | | 40 | | | | | | Enchanter’s-nightshade | | | | | | | | | | | Dominant herb species | | | | | | | |
| Circaea alpina | | | | | | 15 | | | | | | | Alpine enchanter’s-nightshade | | | | | | | | | | Dominant herb species | | | | | | | |
| Plagiomnium undulatum | | | | | | 75 | | | | | | | Wavy star moss | | | | | | | | | | Dominant moss species | | | | | | | |

# **Cladonio-Pinetum sylvestris typicum PASSARGE 1956**

| **Synonym** | | | | **1.Sources of the community relevées** | | | | | | | | | | | | | | | | | | | | | | **No. of relevées** | | | |
| --- | --- | --- | --- | --- | --- | --- | --- | --- | --- | --- | --- | --- | --- | --- | --- | --- | --- | --- | --- | --- | --- | --- | --- | --- | --- | --- | --- | --- | --- |
| **2. EUNIS-Code, mapped EUNIS class** | | | | | | | | | | | | | | | | | | | | | |
| Lichen-Scotch pine forest | | | | 1. Passarge et Hofmann (1968) Tab. 36a (also Matuczkiewicz (1962) Tab. 1/1; Krieger (1937) Tab. 7-10; Berg et al 2001 Tab. 32.1.1.4 and Text p. 466; Runge (1994) p. 247; Heinken et Zippel 1999 Tab. 2/1) | | | | | | | | | | | | | | | | | | | | | | 374 | | | |
| 2. T352112, T35 - Temperate continental Pinus sylvestris forest | | | | | | | | | | | | | | | | | | | | | |
| **Possible climate classes** | | | | | | | | | | | | | | | | | | | | | | | | | | | | | |
| 06 | 07 | 14 | 15 | | 16 | | 17 | 23 | | 24 | 25 | | | 26 | 27 | 31 | 32 | 33 | | | 34 | | 35 | 36 | 37 | | | 41 | 42 |
| 43 | 44 | 45 | 46 | | 47 | | 51 | 52 | | 53 | 54 | | | 55 | 56 | 57 | 60 | 61 | | | 62 | | 63 | 64 | 65 | | | 66 | 67 |
| **Typical site forms according to Benning et al. (2015)** | | | | | | | | | | | | | | | | | | | | | | | | | | | | | |
| **Water budget levels** | | | | | | | | | **Trophy levels** | | | | | | | | | | **Relief/ Exposition** | | | | | | | | | | |
| T1, T2, T3, T4 | | | | | | | | | o | | | | | | | | | | Sunny slope | | | | | | | | | | |
| **Typical community parameter ranges** | | | | | | | | | | | | | | | | | | | | | | | | | | | | | |
| **Lower limit (fuzzy)** | | | | | | | **Lower limit of optimum** | | | | | | | | **Upper limit of optimum** | | | | | | | | **Upper limit (fuzzy)** | | | | | | |
| **Base saturation (according to Kappen-Adrian) [%]** | | | | | | | | | | | | | | | | | | | | | | | | | | | | | |
| 4 | | | | | | | 9 | | | | | | | | 27 | | | | | | | | 32 | | | | | | |
| **pHH2O [-]** | | | | | | | | | | | | | | | | | | | | | | | | | | | | | |
| 3.1 | | | | | | | 3.5 | | | | | | | | 5.0 | | | | | | | | 5.4 | | | | | | |
| **C/N ratio in humus and 10 cm mineral soil layer [%C/%N]** | | | | | | | | | | | | | | | | | | | | | | | | | | | | | |
| 22 | | | | | | | 25 | | | | | | | | 37 | | | | | | | | 40 | | | | | | |
| **Volumetric water content in the rooted soil layer [%]** | | | | | | | | | | | | | | | | | | | | | | | | | | | | | |
| 4 | | | | | | | 7 | | | | | | | | 17 | | | | | | | | 19 | | | | | | |
| **Growing season length [d>10°TMT/a]** | | | | | | | | | | | | | | | | | | | | | | | | | | | | | |
| 115 | | | | | | | 133 | | | | | | | | 203 | | | | | | | | 220 | | | | | | |
| **Climatic water balance per vegetation month [mm/Veg.-Mon.]** | | | | | | | | | | | | | | | | | | | | | | | | | | | | | |
| -46 | | | | | | | -40 | | | | | | | | 60 | | | | | | | | 70 | | | | | | |
| **Solar radiation (PAR) in the growing season [kWh m-2 a-1]** | | | | | | | | | | | | | **Lower limit (fuzzy)** | | | | | | | | | **Upper limit (fuzzy)** | | | | | | | |
| 335 | | | | | | | | | 630 | | | | | | | |
| **Lowest frost hardiness of all characteristic tree and shrub species (max. average annual low temperature) [°C]** | | | | | | | | | | | | | | | | | | | | | | | | | | | -36 | | |
| **Natural/near-natural combination of species** | | | | | | | | | | | | | | | | | | | | | | | | | | | | | |
| **Species** | | | | | | **Areal fraction [%]** | | | | | | **Species (english)** | | | | | | | | **Structural element** | | | | | | | | | |
| Pinus sylvestris | | | | | | 60 | | | | | | Scotch pine | | | | | | | | Main tree species 1 | | | | | | | | | |
| Cladonia furcata | | | | | | 5 | | | | | | Branch reindeer lichen | | | | | | | | Dominant lichen species | | | | | | | | | |
| Avenella flexuosa | | | | | | 20 | | | | | | Wavy hairgrass | | | | | | | | Dominant herb species | | | | | | | | | |
| Vaccinium myrtillus | | | | | | 3 | | | | | | Blueberry | | | | | | | | Character herb species | | | | | | | | | |
| Pleurozium schreberi | | | | | | 5 | | | | | | Red stem moss | | | | | | | | Dominant moss species | | | | | | | | | |
| Dicranum spurium | | | | | | 5 | | | | | | Loggerhead moss | | | | | | | | Dominant moss species | | | | | | | | | |
| Dicranum scoparium | | | | | | 20 | | | | | | Common fork moss | | | | | | | | Dominant moss species | | | | | | | | | |
| Juniperus communis | | | | | | 5 | | | | | | Common juniper | | | | | | | | Upper tree/shrub layer | | | | | | | | | |

# **Corno-Quercetum (pubescentis-dalechampii) MATHÉ et KOVÁCS 1962**

| **Synonym** | | | | | | | | | | | **1.Sources of the community relevées** | | | | | | | | | | | | | | | **No. of relevées** | | | |
| --- | --- | --- | --- | --- | --- | --- | --- | --- | --- | --- | --- | --- | --- | --- | --- | --- | --- | --- | --- | --- | --- | --- | --- | --- | --- | --- | --- | --- | --- |
| **2. EUNIS-Code, mapped EUNIS class** | | | | | | | | | | | | | | |
| Cornelian cherry-Downy oak forest  Lithospermo-Quercetum virgilianae Klika 1957; Carici montanae-Quercetum pedunculiflorae Šomšák et Háberová 1979; Waldsteinio-Carpinetum (Jakucs &. Jurko 1967) Soó 1971 | | | | | | | | | | | 1. Rolecek (2005) Table 1/3 (also Klika (1937) Table 3; Soó 1964b p. 279; Chytry (1994) Table 1/42-53; Willner et Grabherr (2007) Table 14/9) | | | | | | | | | | | | | | | 120 | | | |
| 2. T193 - Eastern Quercus pubescens forests | | | | | | | | | | | | | | |
| **Possible climate classes** | | | | | | | | | | | | | | | | | | | | | | | | | | | | | |
| 06 | 07 | 14 | 15 | 16 | 17 | 23 | | | 24 | 25 | | | 26 | 27 | | 31 | 32 | 33 | | 34 | | | 35 | 36 | 37 | | | 41 | 42 |
| 43 | 44 | 45 | 46 | 47 | 51 | 52 | | | 53 | 54 | | | 55 | 56 | | 57 | 60 | 61 | | 62 | | | 63 | 64 | 65 | | | 66 | 67 |
| **Typical site forms according to Benning et al. (2015)** | | | | | | | | | | | | | | | | | | | | | | | | | | | | | |
| **Water budget levels** | | | | | | | **Trophy levels** | | | | | | | | | | | | **Relief/ Exposition** | | | | | | | | | | |
| T4, T5 | | | | | | | e | | | | | | | | | | | | Plane, Shady slope, Sunny slope | | | | | | | | | | |
| **Typical community parameter ranges** | | | | | | | | | | | | | | | | | | | | | | | | | | | | | |
| **Lower limit (fuzzy)** | | | | | **Lower limit of optimum** | | | | | | | | | **Upper limit of optimum** | | | | | | | | | **Upper limit (fuzzy)** | | | | | | |
| **Base saturation (according to Kappen-Adrian) [%]** | | | | | | | | | | | | | | | | | | | | | | | | | | | | | |
| 40 | | | | | 52 | | | | | | | | | 100 | | | | | | | | | 100 | | | | | | |
| **pHH2O [-]** | | | | | | | | | | | | | | | | | | | | | | | | | | | | | |
| 6.1 | | | | | 6.5 | | | | | | | | | 7.6 | | | | | | | | | 8 | | | | | | |
| **C/N ratio in humus and 10 cm mineral soil layer [%C/%N]** | | | | | | | | | | | | | | | | | | | | | | | | | | | | | |
| 15 | | | | | 16 | | | | | | | | | 21 | | | | | | | | | 22 | | | | | | |
| **Volumetric water content in the rooted soil layer [%]** | | | | | | | | | | | | | | | | | | | | | | | | | | | | | |
| 8 | | | | | 10 | | | | | | | | | 17 | | | | | | | | | 19 | | | | | | |
| **Growing season length [d>10°TMT/a]** | | | | | | | | | | | | | | | | | | | | | | | | | | | | | |
| 165 | | | | | 174 | | | | | | | | | 211 | | | | | | | | | 220 | | | | | | |
| **Climatic water balance per vegetation month [mm/Veg.-Mon.]** | | | | | | | | | | | | | | | | | | | | | | | | | | | | | |
| -46 | | | | | -40 | | | | | | | | | -14 | | | | | | | | | -8 | | | | | | |
| **Solar radiation (PAR) in the growing season [kWh m-2 a-1]** | | | | | | | | | | | | **Lower limit (fuzzy)** | | | | | | | | | **Upper limit (fuzzy)** | | | | | | | | |
| 553 | | | | | | | | | 673 | | | | | | | | |
| **Lowest frost hardiness of all characteristic tree and shrub species (max. average annual low temperature) [°C]** | | | | | | | | | | | | | | | | | | | | | | | | | | | -18 | | |
| **Natural/near-natural combination of species** | | | | | | | | | | | | | | | | | | | | | | | | | | | | | |
| **Species** | | | | | | | | **Areal fraction [%]** | | | | | | | **Species (english)** | | | | | | | **Structural element** | | | | | | | |
| Carpinus betulus | | | | | | | | 10 | | | | | | | European hornbeam | | | | | | | Secondary tree species | | | | | | | |
| Quercus pubescens | | | | | | | | 50 | | | | | | | Downy oak | | | | | | | Main tree species 1 | | | | | | | |
| Quercus dalechampii | | | | | | | | 10 | | | | | | | Dalechamps oak | | | | | | | Main tree species 2 | | | | | | | |
| Quercus robur pedunculiflora | | | | | | | | 10 | | | | | | | Grayish oak | | | | | | | Mixed tree species | | | | | | | |
| Sorbus aria | | | | | | | | 20 | | | | | | | Common whitebeam | | | | | | | Intermediate tree layer | | | | | | | |
| Cornus mas | | | | | | | | 20 | | | | | | | Cornel cherry | | | | | | | Intermediate tree layer | | | | | | | |
| Sorbus torminalis | | | | | | | | 20 | | | | | | | Service tree | | | | | | | Intermediate tree layer | | | | | | | |
| Acer campestre | | | | | | | | 5 | | | | | | | Hedge maple | | | | | | | Secondary tree species | | | | | | | |
| Brachypodium sylvaticum | | | | | | | | 40 | | | | | | | False brome | | | | | | | Dominant herb species | | | | | | | |
| Lithospermum purpurocaeruleum | | | | | | | | 20 | | | | | | | Purple gromwell | | | | | | | Dominant herb species | | | | | | | |
| Cornus sanguinea | | | | | | | | 10 | | | | | | | Bloodtwig dogwood | | | | | | | Upper tree/shrub layer | | | | | | | |
| Viburnum lantana | | | | | | | | 5 | | | | | | | Wayfaring tree | | | | | | | Upper tree/shrub layer | | | | | | | |
| Euonymus verrucosa | | | | | | | | 5 | | | | | | | Warty spindle bush | | | | | | | Upper tree/shrub layer | | | | | | | |
| Corylus avellana | | | | | | | | 5 | | | | | | | Hazel | | | | | | | Intermediate tree layer | | | | | | | |
| Crataegus laevigata | | | | | | | | 5 | | | | | | | Midland hawthorn | | | | | | | Intermediate tree layer | | | | | | | |
| Ligustrum vulgare | | | | | | | | 5 | | | | | | | European privet | | | | | | | Upper tree/shrub layer | | | | | | | |

# **Coronilla emeri-Quercetum pubescentis dictamnodetosum FÖRSTER 1968**

| **Synonym** | | | | | **1.Sources of the community relevées** | | | | | | | | | | | | | | | | | | | | | | | | **No. of relevées** | | | |
| --- | --- | --- | --- | --- | --- | --- | --- | --- | --- | --- | --- | --- | --- | --- | --- | --- | --- | --- | --- | --- | --- | --- | --- | --- | --- | --- | --- | --- | --- | --- | --- | --- |
| **2. EUNIS-Code, mapped EUNIS class** | | | | | | | | | | | | | | | | | | | | | | | |
| Scorpion senna- Downy oak forest (Dittany subass.) | | | | | 1. Oberdorfer (1992) Vol IV, Tab. 298/2Ab and Text Vol. p. 128 | | | | | | | | | | | | | | | | | | | | | | | | 21 | | | |
| 2. T193 - Eastern Quercus pubescens forests | | | | | | | | | | | | | | | | | | | | | | | |
| **Possible climate classes** | | | | | | | | | | | | | | | | | | | | | | | | | | | | | | | | |
| 06 | 07 | 14 | 15 | 16 | | 17 | | | 23 | | 24 | 25 | 26 | | | 27 | 31 | | 32 | 33 | | | 34 | | 35 | | 36 | 37 | | | 41 | 42 |
| 43 | 44 | 45 | 46 | 47 | | 51 | | | 52 | | 53 | 54 | 55 | | | 56 | 57 | | 60 | 61 | | | 62 | | 63 | | 64 | 65 | | | 66 | 67 |
| **Typical site forms according to Benning et al. (2015)** | | | | | | | | | | | | | | | | | | | | | | | | | | | | | | | | |
| **Water budget levels** | | | | | | | | | | **Trophy levels** | | | | | | | | | | | | **Relief/ Exposition** | | | | | | | | | | |
| T1, T2, T3, T4, T5 | | | | | | | | | | e | | | | | | | | | | | | Sunny slope | | | | | | | | | | |
| **Typical community parameter ranges** | | | | | | | | | | | | | | | | | | | | | | | | | | | | | | | | |
| **Lower limit (fuzzy)** | | | | | | | | **Lower limit of optimum** | | | | | | | | | | **Upper limit of optimum** | | | | | | | | **Upper limit (fuzzy)** | | | | | | |
| **Base saturation (according to Kappen-Adrian) [%]** | | | | | | | | | | | | | | | | | | | | | | | | | | | | | | | | |
| 34 | | | | | | | | 47 | | | | | | | | | | 100 | | | | | | | | 100 | | | | | | |
| **pHH2O [-]** | | | | | | | | | | | | | | | | | | | | | | | | | | | | | | | | |
| 5.6 | | | | | | | | 6.1 | | | | | | | | | | 7.5 | | | | | | | | 8 | | | | | | |
| **C/N ratio in humus and 10 cm mineral soil layer [%C/%N]** | | | | | | | | | | | | | | | | | | | | | | | | | | | | | | | | |
| 15 | | | | | | | | 17 | | | | | | | | | | 24 | | | | | | | | 26 | | | | | | |
| **Volumetric water content in the rooted soil layer [%]** | | | | | | | | | | | | | | | | | | | | | | | | | | | | | | | | |
| 6 | | | | | | | | 9 | | | | | | | | | | 20 | | | | | | | | 23 | | | | | | |
| **Growing season length [d>10°TMT/a]** | | | | | | | | | | | | | | | | | | | | | | | | | | | | | | | | |
| 165 | | | | | | | | 174 | | | | | | | | | | 211 | | | | | | | | 220 | | | | | | |
| **Climatic water balance per vegetation month [mm/Veg.-Mon.]** | | | | | | | | | | | | | | | | | | | | | | | | | | | | | | | | |
| -27 | | | | | | | | -11 | | | | | | | | | | 60 | | | | | | | | 70 | | | | | | |
| **Solar radiation (PAR) in the growing season [kWh m-2 a-1]** | | | | | | | | | | | | | | | **Lower limit (fuzzy)** | | | | | | | | | **Upper limit (fuzzy)** | | | | | | | | |
| 593 | | | | | | | | | 771 | | | | | | | | |
| **Lowest frost hardiness of all characteristic tree and shrub species (max. average annual low temperature) [°C]** | | | | | | | | | | | | | | | | | | | | | | | | | | | | | | -16 | | |
| **Natural/near-natural combination of species** | | | | | | | | | | | | | | | | | | | | | | | | | | | | | | | | |
| **Species** | | | | | | | **Areal fraction [%]** | | | | | | | **Species (english)** | | | | | | | **Structural element** | | | | | | | | | | | |
| Quercus pubescens | | | | | | | 30 | | | | | | | Downy oak | | | | | | | Main tree species 1 | | | | | | | | | | | |
| Quercus cerris | | | | | | | 20 | | | | | | | Turkey oak | | | | | | | Main tree species 2 | | | | | | | | | | | |
| Castanea sativa | | | | | | | 15 | | | | | | | Chestnut | | | | | | | Mixed tree species | | | | | | | | | | | |
| Viola hirta | | | | | | | 10 | | | | | | | Rough violet | | | | | | | Dominant herb species | | | | | | | | | | | |
| Hedera helix | | | | | | | 10 | | | | | | | English ivy | | | | | | | Upper tree/shrub layer | | | | | | | | | | | |
| Prunus spinosa | | | | | | | 15 | | | | | | | Blackthorn | | | | | | | Upper tree/shrub layer | | | | | | | | | | | |
| Coronilla emerus | | | | | | | 10 | | | | | | | Scorpion senna | | | | | | | Upper tree/shrub layer | | | | | | | | | | | |
| Cornus sanguinea | | | | | | | 5 | | | | | | | Bloodtwig dogwood | | | | | | | Upper tree/shrub layer | | | | | | | | | | | |
| Crataegus monogyna | | | | | | | 15 | | | | | | | Common hawthorn | | | | | | | Intermediate tree layer | | | | | | | | | | | |
| Dictamnus albus | | | | | | | 10 | | | | | | | Dittany | | | | | | | Upper tree/shrub layer | | | | | | | | | | | |
| Ligustrum vulgare | | | | | | | 10 | | | | | | | European privet | | | | | | | Upper tree/shrub layer | | | | | | | | | | | |
| Viburnum lantana | | | | | | | 15 | | | | | | | Wayfaring tree | | | | | | | Upper tree/shrub layer | | | | | | | | | | | |

# **Coronilla emeri-Quercetum pubescentis typicum FÖRSTER 1968**

| **Synonym** | | | | **1.Sources of the community relevées** | | | | | | | | | | | | | | | | | | | | | | **No. of relevées** | | | |
| --- | --- | --- | --- | --- | --- | --- | --- | --- | --- | --- | --- | --- | --- | --- | --- | --- | --- | --- | --- | --- | --- | --- | --- | --- | --- | --- | --- | --- | --- |
| **2. EUNIS-Code, mapped EUNIS class** | | | | | | | | | | | | | | | | | | | | | |
| Scorpion senna- Downy oak forest (typ. subass.) | | | | 1. Oberdorfer (1992) Vol IV, Tab. 298/2Ac and Text Vol. p. 128 | | | | | | | | | | | | | | | | | | | | | | 28 | | | |
| 2. T193 - Eastern Quercus pubescens forests | | | | | | | | | | | | | | | | | | | | | |
| **Possible climate classes** | | | | | | | | | | | | | | | | | | | | | | | | | | | | | |
| 06 | 07 | 14 | 15 | | 16 | | 17 | 23 | | 24 | 25 | | | 26 | 27 | 31 | 32 | 33 | | | 34 | | 35 | 36 | 37 | | | 41 | 42 |
| 43 | 44 | 45 | 46 | | 47 | | 51 | 52 | | 53 | 54 | | | 55 | 56 | 57 | 60 | 61 | | | 62 | | 63 | 64 | 65 | | | 66 | 67 |
| **Typical site forms according to Benning et al. (2015)** | | | | | | | | | | | | | | | | | | | | | | | | | | | | | |
| **Water budget levels** | | | | | | | | | **Trophy levels** | | | | | | | | | | | **Relief/ Exposition** | | | | | | | | | |
| T1, T2, T3, T4, T5 | | | | | | | | | e | | | | | | | | | | | Plane, Shady slope | | | | | | | | | |
| **Typical community parameter ranges** | | | | | | | | | | | | | | | | | | | | | | | | | | | | | |
| **Lower limit (fuzzy)** | | | | | | | **Lower limit of optimum** | | | | | | | | **Upper limit of optimum** | | | | | | | | **Upper limit (fuzzy)** | | | | | | |
| **Base saturation (according to Kappen-Adrian) [%]** | | | | | | | | | | | | | | | | | | | | | | | | | | | | | |
| 34 | | | | | | | 47 | | | | | | | | 100 | | | | | | | | 100 | | | | | | |
| **pHH2O [-]** | | | | | | | | | | | | | | | | | | | | | | | | | | | | | |
| 5.6 | | | | | | | 6.1 | | | | | | | | 7.5 | | | | | | | | 8 | | | | | | |
| **C/N ratio in humus and 10 cm mineral soil layer [%C/%N]** | | | | | | | | | | | | | | | | | | | | | | | | | | | | | |
| 15 | | | | | | | 16 | | | | | | | | 21 | | | | | | | | 22 | | | | | | |
| **Volumetric water content in the rooted soil layer [%]** | | | | | | | | | | | | | | | | | | | | | | | | | | | | | |
| 8 | | | | | | | 11 | | | | | | | | 21 | | | | | | | | 23 | | | | | | |
| **Growing season length [d>10°TMT/a]** | | | | | | | | | | | | | | | | | | | | | | | | | | | | | |
| 165 | | | | | | | 174 | | | | | | | | 211 | | | | | | | | 220 | | | | | | |
| **Climatic water balance per vegetation month [mm/Veg.-Mon.]** | | | | | | | | | | | | | | | | | | | | | | | | | | | | | |
| -27 | | | | | | | -11 | | | | | | | | 60 | | | | | | | | 70 | | | | | | |
| **Solar radiation (PAR) in the growing season [kWh m-2 a-1]** | | | | | | | | | | | | | **Lower limit (fuzzy)** | | | | | | | | | **Upper limit (fuzzy)** | | | | | | | |
| 556 | | | | | | | | | 665 | | | | | | | |
| **Lowest frost hardiness of all characteristic tree and shrub species (max. average annual low temperature) [°C]** | | | | | | | | | | | | | | | | | | | | | | | | | | | -16 | | |
| **Natural/near-natural combination of species** | | | | | | | | | | | | | | | | | | | | | | | | | | | | | |
| **Species** | | | | | | **Areal fraction [%]** | | | | | | **Species (english)** | | | | | | | **Structural element** | | | | | | | | | | |
| Quercus pubescens | | | | | | 30 | | | | | | Downy oak | | | | | | | Main tree species 1 | | | | | | | | | | |
| Carpinus betulus | | | | | | 10 | | | | | | European hornbeam | | | | | | | Mixed tree species | | | | | | | | | | |
| Quercus petraea | | | | | | 20 | | | | | | Sessile oak | | | | | | | Main tree species 2 | | | | | | | | | | |
| Castanea sativa | | | | | | 5 | | | | | | Chestnut | | | | | | | Secondary tree species | | | | | | | | | | |
| Quercus cerris | | | | | | 2 | | | | | | Turkey oak | | | | | | | Secondary tree species | | | | | | | | | | |
| Acer campestre | | | | | | 5 | | | | | | Hedge maple | | | | | | | Secondary tree species | | | | | | | | | | |
| Sorbus torminalis | | | | | | 5 | | | | | | Service tree | | | | | | | Intermediate tree layer | | | | | | | | | | |
| Viola hirta | | | | | | 10 | | | | | | Rough violet | | | | | | | Dominant herb species | | | | | | | | | | |
| Hedera helix | | | | | | 60 | | | | | | English ivy | | | | | | | Upper tree/shrub layer | | | | | | | | | | |
| Chrysanthemum corymbosum | | | | | | 10 | | | | | | Corymbflower tansy | | | | | | | Dominant herb species | | | | | | | | | | |
| Primula veris canescens | | | | | | 10 | | | | | | Gray meadow primrose | | | | | | | Dominant herb species | | | | | | | | | | |
| Mannia triandra | | | | | | 5 | | | | | | Three-man dwarf lung moss | | | | | | | Dominant moss species | | | | | | | | | | |
| Crataegus monogyna | | | | | | 20 | | | | | | Common hawthorn | | | | | | | Intermediate tree layer | | | | | | | | | | |
| Coronilla emerus | | | | | | 5 | | | | | | Scorpion senna | | | | | | | Upper tree/shrub layer | | | | | | | | | | |
| Viburnum lantana | | | | | | 10 | | | | | | Wayfaring tree | | | | | | | Upper tree/shrub layer | | | | | | | | | | |
| Dictamnus albus | | | | | | 5 | | | | | | Dittany | | | | | | | Upper tree/shrub layer | | | | | | | | | | |
| Ligustrum vulgare | | | | | | 10 | | | | | | European privet | | | | | | | Upper tree/shrub layer | | | | | | | | | | |
| Cornus sanguinea | | | | | | 5 | | | | | | Bloodtwig dogwood | | | | | | | Upper tree/shrub layer | | | | | | | | | | |

# **Corynephoro-Pinetum sylvestris (JURASZEK 1928) HOFMANN 1964**

| **Synonym** | | | | | | | | | | | **1.Sources of the community relevées** | | | | | | | | | | | | | | | **No. of relevées** | | | |
| --- | --- | --- | --- | --- | --- | --- | --- | --- | --- | --- | --- | --- | --- | --- | --- | --- | --- | --- | --- | --- | --- | --- | --- | --- | --- | --- | --- | --- | --- |
| **2. EUNIS-Code, mapped EUNIS class** | | | | | | | | | | | | | | |
| Whitish hair-grass-Scotch pine wood  Peucedano-Pinetum Matuszkiewicz 1962 | | | | | | | | | | | 1. Passarge et Hofmann (1968) Tab. 37a,b (also: Heinken et Zippel 1999 Tab. 3/1-2) | | | | | | | | | | | | | | | 122 | | | |
| 2. T35232, T35 - Temperate continental Pinus sylvestris forest | | | | | | | | | | | | | | |
| **Possible climate classes** | | | | | | | | | | | | | | | | | | | | | | | | | | | | | |
| 06 | 07 | 14 | 15 | 16 | 17 | | 23 | | 24 | 25 | | | 26 | | 27 | 31 | 32 | 33 | | | 34 | | 35 | 36 | 37 | | | 41 | 42 |
| 43 | 44 | 45 | 46 | 47 | 51 | | 52 | | 53 | 54 | | | 55 | | 56 | 57 | 60 | 61 | | | 62 | | 63 | 64 | 65 | | | 66 | 67 |
| **Typical site forms according to Benning et al. (2015)** | | | | | | | | | | | | | | | | | | | | | | | | | | | | | |
| **Water budget levels** | | | | | | | | **Trophy levels** | | | | | | | | | | | **Relief/ Exposition** | | | | | | | | | | |
| T1, T2, T3, T4 | | | | | | | | o | | | | | | | | | | | Sunny slope | | | | | | | | | | |
| **Typical community parameter ranges** | | | | | | | | | | | | | | | | | | | | | | | | | | | | | |
| **Lower limit (fuzzy)** | | | | | **Lower limit of optimum** | | | | | | | | | | **Upper limit of optimum** | | | | | | | | **Upper limit (fuzzy)** | | | | | | |
| **Base saturation (according to Kappen-Adrian) [%]** | | | | | | | | | | | | | | | | | | | | | | | | | | | | | |
| 4 | | | | | 7 | | | | | | | | | | 19 | | | | | | | | 22 | | | | | | |
| **pHH2O [-]** | | | | | | | | | | | | | | | | | | | | | | | | | | | | | |
| 3.1 | | | | | 3.3 | | | | | | | | | | 4.3 | | | | | | | | 4.5 | | | | | | |
| **C/N ratio in humus and 10 cm mineral soil layer [%C/%N]** | | | | | | | | | | | | | | | | | | | | | | | | | | | | | |
| 18 | | | | | 20 | | | | | | | | | | 29 | | | | | | | | 31 | | | | | | |
| **Volumetric water content in the rooted soil layer [%]** | | | | | | | | | | | | | | | | | | | | | | | | | | | | | |
| 4 | | | | | 7 | | | | | | | | | | 17 | | | | | | | | 19 | | | | | | |
| **Growing season length [d>10°TMT/a]** | | | | | | | | | | | | | | | | | | | | | | | | | | | | | |
| 140 | | | | | 153 | | | | | | | | | | 207 | | | | | | | | 220 | | | | | | |
| **Climatic water balance per vegetation month [mm/Veg.-Mon.]** | | | | | | | | | | | | | | | | | | | | | | | | | | | | | |
| -46 | | | | | -40 | | | | | | | | | | 50 | | | | | | | | 70 | | | | | | |
| **Solar radiation (PAR) in the growing season [kWh m-2 a-1]** | | | | | | | | | | | | **Lower limit (fuzzy)** | | | | | | | | | | **Upper limit (fuzzy)** | | | | | | | |
| 391 | | | | | | | | | | 630 | | | | | | | |
| **Lowest frost hardiness of all characteristic tree and shrub species (max. average annual low temperature) [°C]** | | | | | | | | | | | | | | | | | | | | | | | | | | | -36 | | |
| **Natural/near-natural combination of species** | | | | | | | | | | | | | | | | | | | | | | | | | | | | | |
| **Species** | | | | | | **Areal fraction [%]** | | | | | | | | **Species (english)** | | | | | | **Structural element** | | | | | | | | | |
| Pinus sylvestris | | | | | | 65 | | | | | | | | Scotch pine | | | | | | Main tree species 1 | | | | | | | | | |
| Cladonia arbuscula | | | | | | 25 | | | | | | | | Sparse reindeer lichen | | | | | | Dominant lichen species | | | | | | | | | |
| Cladonia rangiferina | | | | | | 15 | | | | | | | | True reindeer lichen | | | | | | Dominant lichen species | | | | | | | | | |
| Corynephorus canescens | | | | | | 15 | | | | | | | | Whitish hair-grass | | | | | | Dominant herb species | | | | | | | | | |
| Avenella flexuosa | | | | | | 5 | | | | | | | | Wavy hairgrass | | | | | | Dominant herb species | | | | | | | | | |
| Spergula morisonii | | | | | | 5 | | | | | | | | Morison’s spurry | | | | | | Dominant herb species | | | | | | | | | |
| Teesdalia nudicaulis | | | | | | 1 | | | | | | | | Barestem teesdalia | | | | | | Character herb species | | | | | | | | | |
| Polytrichum piliferum | | | | | | 15 | | | | | | | | Glass hair wispy moss | | | | | | Dominant moss species | | | | | | | | | |

# **Cotino coggygraria-Quercetum pubescentis coronilletosum coronataea SOÓ 1931**

| **Synonym** | | | | | | | | | **1.Sources of the community relevées** | | | | | | | | | | | | | | | | | **No. of relevées** | | | |
| --- | --- | --- | --- | --- | --- | --- | --- | --- | --- | --- | --- | --- | --- | --- | --- | --- | --- | --- | --- | --- | --- | --- | --- | --- | --- | --- | --- | --- | --- |
| **2. EUNIS-Code, mapped EUNIS class** | | | | | | | | | | | | | | | | |
| Fustet-Downy oak forest (crown vetch subass.) | | | | | | | | | 1. Jakucs (1961) Table VI (also: Soó 1964b p. 267) | | | | | | | | | | | | | | | | | 70 | | | |
| 2. T193 - Eastern Quercus pubescens forests | | | | | | | | | | | | | | | | |
| **Possible climate classes** | | | | | | | | | | | | | | | | | | | | | | | | | | | | | |
| 06 | 07 | 14 | 15 | 16 | | 17 | 23 | | | 24 | 25 | | | 26 | 27 | 31 | 32 | 33 | | | 34 | | 35 | 36 | 37 | | | 41 | 42 |
| 43 | 44 | 45 | 46 | 47 | | 51 | 52 | | | 53 | 54 | | | 55 | 56 | 57 | 60 | 61 | | | 62 | | 63 | 64 | 65 | | | 66 | 67 |
| **Typical site forms according to Benning et al. (2015)** | | | | | | | | | | | | | | | | | | | | | | | | | | | | | |
| **Water budget levels** | | | | | | | | **Trophy levels** | | | | | | | | | | | **Relief/ Exposition** | | | | | | | | | | |
| T1, T2, T3, T4, T5 | | | | | | | | e | | | | | | | | | | | Plane | | | | | | | | | | |
| **Typical community parameter ranges** | | | | | | | | | | | | | | | | | | | | | | | | | | | | | |
| **Lower limit (fuzzy)** | | | | | | **Lower limit of optimum** | | | | | | | | | **Upper limit of optimum** | | | | | | | | **Upper limit (fuzzy)** | | | | | | |
| **Base saturation (according to Kappen-Adrian) [%]** | | | | | | | | | | | | | | | | | | | | | | | | | | | | | |
| 52 | | | | | | 62 | | | | | | | | | 100 | | | | | | | | 100 | | | | | | |
| **pHH2O [-]** | | | | | | | | | | | | | | | | | | | | | | | | | | | | | |
| 6.4 | | | | | | 6.7 | | | | | | | | | 7.7 | | | | | | | | 8 | | | | | | |
| **C/N ratio in humus and 10 cm mineral soil layer [%C/%N]** | | | | | | | | | | | | | | | | | | | | | | | | | | | | | |
| 15 | | | | | | 17 | | | | | | | | | 24 | | | | | | | | 26 | | | | | | |
| **Volumetric water content in the rooted soil layer [%]** | | | | | | | | | | | | | | | | | | | | | | | | | | | | | |
| 5 | | | | | | 8 | | | | | | | | | 20 | | | | | | | | 23 | | | | | | |
| **Growing season length [d>10°TMT/a]** | | | | | | | | | | | | | | | | | | | | | | | | | | | | | |
| 165 | | | | | | 174 | | | | | | | | | 211 | | | | | | | | 220 | | | | | | |
| **Climatic water balance per vegetation month [mm/Veg.-Mon.]** | | | | | | | | | | | | | | | | | | | | | | | | | | | | | |
| -46 | | | | | | -40 | | | | | | | | | 22 | | | | | | | | 35 | | | | | | |
| **Solar radiation (PAR) in the growing season [kWh m-2 a-1]** | | | | | | | | | | | | | **Lower limit (fuzzy)** | | | | | | | | | **Upper limit (fuzzy)** | | | | | | | |
| 591 | | | | | | | | | 803 | | | | | | | |
| **Lowest frost hardiness of all characteristic tree and shrub species (max. average annual low temperature) [°C]** | | | | | | | | | | | | | | | | | | | | | | | | | | | -18 | | |
| **Natural/near-natural combination of species** | | | | | | | | | | | | | | | | | | | | | | | | | | | | | |
| **Species** | | | | | **Areal fraction [%]** | | | | | | | **Species (english)** | | | | | | | | **Structural element** | | | | | | | | | |
| Fraxinus ornus | | | | | 40 | | | | | | | Manna ash | | | | | | | | Main tree species 2 | | | | | | | | | |
| Quercus pubescens | | | | | 60 | | | | | | | Downy oak | | | | | | | | Main tree species 1 | | | | | | | | | |
| Cornus mas | | | | | 5 | | | | | | | Cornel cherry | | | | | | | | Intermediate tree layer | | | | | | | | | |
| Carex humilis | | | | | 20 | | | | | | | Dwarf sedge | | | | | | | | Dominant herb species | | | | | | | | | |
| Carex halleriana | | | | | 25 | | | | | | | Haller’s sedge | | | | | | | | Dominant herb species | | | | | | | | | |
| Polygonatum odoratum | | | | | 30 | | | | | | | Angular Solomon’s-seal | | | | | | | | Dominant herb species | | | | | | | | | |
| Dictamnus albus | | | | | 5 | | | | | | | Dittany | | | | | | | | Upper tree/shrub layer | | | | | | | | | |
| Euonymus verrucosa | | | | | 5 | | | | | | | Warty spindle bush | | | | | | | | Upper tree/shrub layer | | | | | | | | | |
| Cotinus coggygria | | | | | 60 | | | | | | | Fustet | | | | | | | | Upper tree/shrub layer | | | | | | | | | |
| Crataegus monogyna | | | | | 5 | | | | | | | Common hawthorn | | | | | | | | Upper tree/shrub layer | | | | | | | | | |

# **Cotino coggygraria-Quercetum pubescentis seslerietosum variaea FUTÁK 1947**

| **Synonym** | | | | | **1.Sources of the community relevées** | | | | | | | | | | | | | | | | | | | | | **No. of relevées** | | | |
| --- | --- | --- | --- | --- | --- | --- | --- | --- | --- | --- | --- | --- | --- | --- | --- | --- | --- | --- | --- | --- | --- | --- | --- | --- | --- | --- | --- | --- | --- |
| **2. EUNIS-Code, mapped EUNIS class** | | | | | | | | | | | | | | | | | | | | |
| Fustet-Downy oak forest (Lime bluegrass subass.) | | | | | 1. Jakucs (1961) Table VII (also: Hegedusova et al. 2021 tab. 1/2 p. 97+107) | | | | | | | | | | | | | | | | | | | | | 148 | | | |
| 2. T193 - Eastern Quercus pubescens forests | | | | | | | | | | | | | | | | | | | | |
| **Possible climate classes** | | | | | | | | | | | | | | | | | | | | | | | | | | | | | |
| 06 | 07 | 14 | 15 | 16 | | | 17 | 23 | | 24 | 25 | | | 26 | 27 | 31 | 32 | 33 | | | 34 | | 35 | 36 | 37 | | | 41 | 42 |
| 43 | 44 | 45 | 46 | 47 | | | 51 | 52 | | 53 | 54 | | | 55 | 56 | 57 | 60 | 61 | | | 62 | | 63 | 64 | 65 | | | 66 | 67 |
| **Typical site forms according to Benning et al. (2015)** | | | | | | | | | | | | | | | | | | | | | | | | | | | | | |
| **Water budget levels** | | | | | | | | | **Trophy levels** | | | | | | | | | | **Relief/ Exposition** | | | | | | | | | | |
| T1, T2, T3, T4, T5 | | | | | | | | | e | | | | | | | | | | Sunny slope | | | | | | | | | | |
| **Typical community parameter ranges** | | | | | | | | | | | | | | | | | | | | | | | | | | | | | |
| **Lower limit (fuzzy)** | | | | | | | **Lower limit of optimum** | | | | | | | | **Upper limit of optimum** | | | | | | | | **Upper limit (fuzzy)** | | | | | | |
| **Base saturation (according to Kappen-Adrian) [%]** | | | | | | | | | | | | | | | | | | | | | | | | | | | | | |
| 52 | | | | | | | 62 | | | | | | | | 100 | | | | | | | | 100 | | | | | | |
| **pHH2O [-]** | | | | | | | | | | | | | | | | | | | | | | | | | | | | | |
| 6.4 | | | | | | | 6.7 | | | | | | | | 7.7 | | | | | | | | 8 | | | | | | |
| **C/N ratio in humus and 10 cm mineral soil layer [%C/%N]** | | | | | | | | | | | | | | | | | | | | | | | | | | | | | |
| 15 | | | | | | | 17 | | | | | | | | 24 | | | | | | | | 26 | | | | | | |
| **Volumetric water content in the rooted soil layer [%]** | | | | | | | | | | | | | | | | | | | | | | | | | | | | | |
| 4 | | | | | | | 7 | | | | | | | | 20 | | | | | | | | 23 | | | | | | |
| **Growing season length [d>10°TMT/a]** | | | | | | | | | | | | | | | | | | | | | | | | | | | | | |
| 165 | | | | | | | 174 | | | | | | | | 211 | | | | | | | | 220 | | | | | | |
| **Climatic water balance per vegetation month [mm/Veg.-Mon.]** | | | | | | | | | | | | | | | | | | | | | | | | | | | | | |
| -46 | | | | | | | -38 | | | | | | | | -7 | | | | | | | | 1 | | | | | | |
| **Solar radiation (PAR) in the growing season [kWh m-2 a-1]** | | | | | | | | | | | | | **Lower limit (fuzzy)** | | | | | | | | | **Upper limit (fuzzy)** | | | | | | | |
| 584 | | | | | | | | | 748 | | | | | | | |
| **Lowest frost hardiness of all characteristic tree and shrub species (max. average annual low temperature) [°C]** | | | | | | | | | | | | | | | | | | | | | | | | | | | -18 | | |
| **Natural/near-natural combination of species** | | | | | | | | | | | | | | | | | | | | | | | | | | | | | |
| **Species** | | | | | | **Areal fraction [%]** | | | | | | **Species (english)** | | | | | | | | **Structural element** | | | | | | | | | |
| Quercus pubescens | | | | | | 60 | | | | | | Downy oak | | | | | | | | Main tree species 1 | | | | | | | | | |
| Cornus mas | | | | | | 20 | | | | | | Cornel cherry | | | | | | | | Intermediate tree layer | | | | | | | | | |
| Brachypodium pinnatum | | | | | | 30 | | | | | | Heath false brome | | | | | | | | Dominant herb species | | | | | | | | | |
| Carex humilis | | | | | | 30 | | | | | | Dwarf sedge | | | | | | | | Dominant herb species | | | | | | | | | |
| Cotinus coggygria | | | | | | 40 | | | | | | Fustet | | | | | | | | Upper tree/shrub layer | | | | | | | | | |
| Ligustrum vulgare | | | | | | 5 | | | | | | European privet | | | | | | | | Upper tree/shrub layer | | | | | | | | | |
| Rosa canina | | | | | | 5 | | | | | | Dog rose | | | | | | | | Upper tree/shrub layer | | | | | | | | | |
| Corylus avellana | | | | | | 5 | | | | | | Hazel | | | | | | | | Intermediate tree layer | | | | | | | | | |

# **Cytiso nigricantis-Quercetum roboris OBERDORFER 1957**

| **Synonym** | | | | | | **1.Sources of the community relevées** | | | | | | | | | | | | | | | | | | | | **No. of relevées** | | | |
| --- | --- | --- | --- | --- | --- | --- | --- | --- | --- | --- | --- | --- | --- | --- | --- | --- | --- | --- | --- | --- | --- | --- | --- | --- | --- | --- | --- | --- | --- |
| **2. EUNIS-Code, mapped EUNIS class** | | | | | | | | | | | | | | | | | | | |
| Black gorse - Pedunculate oak forest  Luzulo-Quercetum petraeae Hilitzer 1932 | | | | | | 1. Oberdorfer (1992) Vol IV, Tab. 300/3Bc and Text Vol. p. 132 | | | | | | | | | | | | | | | | | | | | 17 | | | |
| 2. T199113, T1991 - Euro-Siberian steppe Quercus forests | | | | | | | | | | | | | | | | | | | |
| **Possible climate classes** | | | | | | | | | | | | | | | | | | | | | | | | | | | | | |
| 06 | 07 | 14 | 15 | 16 | | | 17 | 23 | | 24 | 25 | | | 26 | 27 | 31 | 32 | 33 | | | 34 | | 35 | 36 | 37 | | | 41 | 42 |
| 43 | 44 | 45 | 46 | 47 | | | 51 | 52 | | 53 | 54 | | | 55 | 56 | 57 | 60 | 61 | | | 62 | | 63 | 64 | 65 | | | 66 | 67 |
| **Typical site forms according to Benning et al. (2015)** | | | | | | | | | | | | | | | | | | | | | | | | | | | | | |
| **Water budget levels** | | | | | | | | | **Trophy levels** | | | | | | | | | | | **Relief/ Exposition** | | | | | | | | | |
| T1, T2 | | | | | | | | | e | | | | | | | | | | | Sunny slope | | | | | | | | | |
| **Typical community parameter ranges** | | | | | | | | | | | | | | | | | | | | | | | | | | | | | |
| **Lower limit (fuzzy)** | | | | | | | **Lower limit of optimum** | | | | | | | | **Upper limit of optimum** | | | | | | | | **Upper limit (fuzzy)** | | | | | | |
| **Base saturation (according to Kappen-Adrian) [%]** | | | | | | | | | | | | | | | | | | | | | | | | | | | | | |
| 35 | | | | | | | 46 | | | | | | | | 89 | | | | | | | | 100 | | | | | | |
| **pHH2O [-]** | | | | | | | | | | | | | | | | | | | | | | | | | | | | | |
| 5.7 | | | | | | | 5.9 | | | | | | | | 6.8 | | | | | | | | >7 | | | | | | |
| **C/N ratio in humus and 10 cm mineral soil layer [%C/%N]** | | | | | | | | | | | | | | | | | | | | | | | | | | | | | |
| 15 | | | | | | | 17 | | | | | | | | 24 | | | | | | | | 26 | | | | | | |
| **Volumetric water content in the rooted soil layer [%]** | | | | | | | | | | | | | | | | | | | | | | | | | | | | | |
| 6 | | | | | | | 8 | | | | | | | | 15 | | | | | | | | 17 | | | | | | |
| **Growing season length [d>10°TMT/a]** | | | | | | | | | | | | | | | | | | | | | | | | | | | | | |
| 140 | | | | | | | 153 | | | | | | | | 207 | | | | | | | | 220 | | | | | | |
| **Climatic water balance per vegetation month [mm/Veg.-Mon.]** | | | | | | | | | | | | | | | | | | | | | | | | | | | | | |
| -46 | | | | | | | -40 | | | | | | | | 22 | | | | | | | | 35 | | | | | | |
| **Solar radiation (PAR) in the growing season [kWh m-2 a-1]** | | | | | | | | | | | | | **Lower limit (fuzzy)** | | | | | | | | | **Upper limit (fuzzy)** | | | | | | | |
| 534 | | | | | | | | | 772 | | | | | | | |
| **Lowest frost hardiness of all characteristic tree and shrub species (max. average annual low temperature) [°C]** | | | | | | | | | | | | | | | | | | | | | | | | | | | -20 | | |
| **Natural/near-natural combination of species** | | | | | | | | | | | | | | | | | | | | | | | | | | | | | |
| **Species** | | | | | **Areal fraction [%]** | | | | | | | **Species (english)** | | | | | | | **Structural element** | | | | | | | | | | |
| Quercus robur | | | | | 40 | | | | | | | Pedunculate oak | | | | | | | Main tree species 1 | | | | | | | | | | |
| Quercus petraea | | | | | 20 | | | | | | | Sessile oak | | | | | | | Mixed tree species | | | | | | | | | | |
| Fraxinus excelsior | | | | | 5 | | | | | | | Common ash | | | | | | | Secondary tree species | | | | | | | | | | |
| Tilia cordata | | | | | 5 | | | | | | | Small-leaved lime | | | | | | | Main tree species 2 | | | | | | | | | | |
| Sorbus aria | | | | | 40 | | | | | | | Common whitebeam | | | | | | | Intermediate tree layer | | | | | | | | | | |
| Cytisus nigricans | | | | | 2 | | | | | | | Black gorse | | | | | | | Character herb species | | | | | | | | | | |
| Chrysanthemum corymbosum | | | | | 20 | | | | | | | Corymbflower tansy | | | | | | | Dominant herb species | | | | | | | | | | |
| Mannia triandra | | | | | 5 | | | | | | | Three-man dwarf lung moss | | | | | | | Dominant moss species | | | | | | | | | | |
| Viburnum lantana | | | | | 5 | | | | | | | Wayfaring tree | | | | | | | Upper tree/shrub layer | | | | | | | | | | |
| Ligustrum vulgare | | | | | 5 | | | | | | | European privet | | | | | | | Upper tree/shrub layer | | | | | | | | | | |
| Crataegus laevigata | | | | | 5 | | | | | | | Midland hawthorn | | | | | | | Intermediate tree layer | | | | | | | | | | |
| Corylus avellana | | | | | 5 | | | | | | | Hazel | | | | | | | Intermediate tree layer | | | | | | | | | | |
| Cornus sanguinea | | | | | 5 | | | | | | | Bloodtwig dogwood | | | | | | | Upper tree/shrub layer | | | | | | | | | | |

# **Daphno laureolae-Quercetum cerridis TAFFETANI et BIONDI 1995**

| **Synonym** | | | | **1.Sources of the community relevées** | | | | | | | | | | | | | | | | | | | | | | **No. of relevées** | | | |
| --- | --- | --- | --- | --- | --- | --- | --- | --- | --- | --- | --- | --- | --- | --- | --- | --- | --- | --- | --- | --- | --- | --- | --- | --- | --- | --- | --- | --- | --- |
| **2. EUNIS-Code, mapped EUNIS class** | | | | | | | | | | | | | | | | | | | | | |
| Spurge laurel - Turkey oak forest | | | | 1. Blasi et al. 2020 Tab. 1/12 (also: Dakskobler et al. 2017 Tab. 2/4(DlQc Taffetani et al. 2012 tab. IV) | | | | | | | | | | | | | | | | | | | | | | 71 | | | |
| 2. T1941 - Northern Italian Quercus cerris forests | | | | | | | | | | | | | | | | | | | | | |
| **Possible climate classes** | | | | | | | | | | | | | | | | | | | | | | | | | | | | | |
| 06 | 07 | 14 | 15 | | 16 | | 17 | 23 | | 24 | 25 | | | 26 | 27 | 31 | 32 | 33 | | | 34 | | 35 | 36 | 37 | | | 41 | 42 |
| 43 | 44 | 45 | 46 | | 47 | | 51 | 52 | | 53 | 54 | | | 55 | 56 | 57 | 60 | 61 | | | 62 | | 63 | 64 | 65 | | | 66 | 67 |
| **Typical site forms according to Benning et al. (2015)** | | | | | | | | | | | | | | | | | | | | | | | | | | | | | |
| **Water budget levels** | | | | | | | | | **Trophy levels** | | | | | | | | | | **Relief/ Exposition** | | | | | | | | | | |
| S0, S1, S2 | | | | | | | | | e, mo | | | | | | | | | | Plane, Shady slope | | | | | | | | | | |
| **Typical community parameter ranges** | | | | | | | | | | | | | | | | | | | | | | | | | | | | | |
| **Lower limit (fuzzy)** | | | | | | | **Lower limit of optimum** | | | | | | | | **Upper limit of optimum** | | | | | | | | **Upper limit (fuzzy)** | | | | | | |
| **Base saturation (according to Kappen-Adrian) [%]** | | | | | | | | | | | | | | | | | | | | | | | | | | | | | |
| 28 | | | | | | | 40 | | | | | | | | 88 | | | | | | | | 100 | | | | | | |
| **pHH2O [-]** | | | | | | | | | | | | | | | | | | | | | | | | | | | | | |
| 5 | | | | | | | 5.3 | | | | | | | | 6.7 | | | | | | | | >7 | | | | | | |
| **C/N ratio in humus and 10 cm mineral soil layer [%C/%N]** | | | | | | | | | | | | | | | | | | | | | | | | | | | | | |
| 15 | | | | | | | 17 | | | | | | | | 26 | | | | | | | | 28 | | | | | | |
| **Volumetric water content in the rooted soil layer [%]** | | | | | | | | | | | | | | | | | | | | | | | | | | | | | |
| 6 | | | | | | | 18 | | | | | | | | 23 | | | | | | | | 24 | | | | | | |
| **Growing season length [d>10°TMT/a]** | | | | | | | | | | | | | | | | | | | | | | | | | | | | | |
| 165 | | | | | | | 181 | | | | | | | | 244 | | | | | | | | 260 | | | | | | |
| **Climatic water balance per vegetation month [mm/Veg.-Mon.]** | | | | | | | | | | | | | | | | | | | | | | | | | | | | | |
| -46 | | | | | | | -46 | | | | | | | | 42 | | | | | | | | 59 | | | | | | |
| **Solar radiation (PAR) in the growing season [kWh m-2 a-1]** | | | | | | | | | | | | | **Lower limit (fuzzy)** | | | | | | | | | **Upper limit (fuzzy)** | | | | | | | |
| 713 | | | | | | | | | 1209 | | | | | | | |
| **Lowest frost hardiness of all characteristic tree and shrub species (max. average annual low temperature) [°C]** | | | | | | | | | | | | | | | | | | | | | | | | | | | -16 | | |
| **Natural/near-natural combination of species** | | | | | | | | | | | | | | | | | | | | | | | | | | | | | |
| **Species** | | | | | | **Areal fraction [%]** | | | | | | **Species (english)** | | | | | | | | **Structural element** | | | | | | | | | |
| Fraxinus ornus | | | | | | 40 | | | | | | Manna ash | | | | | | | | Main tree species 1 | | | | | | | | | |
| Quercus cerris | | | | | | 20 | | | | | | Turkey oak | | | | | | | | Main tree species 2 | | | | | | | | | |
| Quercus pubescens | | | | | | 2 | | | | | | Downy oak | | | | | | | | Mixed tree species | | | | | | | | | |
| Quercus ilex | | | | | | 2 | | | | | | Holm oak | | | | | | | | Secondary tree species | | | | | | | | | |
| Castanea sativa | | | | | | 2 | | | | | | Chestnut | | | | | | | | Secondary tree species | | | | | | | | | |
| Sorbus domestica | | | | | | 2 | | | | | | Sorb tree | | | | | | | | Intermediate tree layer | | | | | | | | | |
| Ostrya carpinifolia | | | | | | 2 | | | | | | Hop hornbeam | | | | | | | | Secondary tree species | | | | | | | | | |
| Festuca heterophylla | | | | | | 20 | | | | | | Bristly fescue | | | | | | | | Dominant herb species | | | | | | | | | |
| Cyclamen repandum | | | | | | 2 | | | | | | Curly-leaved cyclamen | | | | | | | | Character herb species | | | | | | | | | |
| Hedera helix | | | | | | 2 | | | | | | English ivy | | | | | | | | Upper tree/shrub layer | | | | | | | | | |
| Corylus avellana | | | | | | 2 | | | | | | Hazel | | | | | | | | Intermediate tree layer | | | | | | | | | |
| Lonicera caprifolium | | | | | | 2 | | | | | | Italian honeysuckle | | | | | | | | Upper tree/shrub layer | | | | | | | | | |
| Ligustrum vulgare | | | | | | 2 | | | | | | European privet | | | | | | | | Upper tree/shrub layer | | | | | | | | | |
| Pyracantha coccinea | | | | | | 2 | | | | | | European firethorn | | | | | | | | Upper tree/shrub layer | | | | | | | | | |
| Daphne laureola | | | | | | 2 | | | | | | Spurge laurel | | | | | | | | Upper tree/shrub layer | | | | | | | | | |
| Cornus mas | | | | | | 2 | | | | | | Cornel cherry | | | | | | | | Intermediate tree layer | | | | | | | | | |

# **Dicrano-Fagetum sylvatici PASSARGE et HOFMANN 1965**

| **Synonym** | | | | **1.Sources of the community relevées** | | | | | | | | | | | | | | | | | | | | | **No. of relevées** | | | |
| --- | --- | --- | --- | --- | --- | --- | --- | --- | --- | --- | --- | --- | --- | --- | --- | --- | --- | --- | --- | --- | --- | --- | --- | --- | --- | --- | --- | --- |
| **2. EUNIS-Code, mapped EUNIS class** | | | | | | | | | | | | | | | | | | | | |
| Common fork moss-Beech wood | | | | 1. Passarge et Hofmann (1968) Tab. 28 | | | | | | | | | | | | | | | | | | | | | 25 | | | |
| 2. T181 - Medio-European acidophilous Fagus forests | | | | | | | | | | | | | | | | | | | | |
| **Possible climate classes** | | | | | | | | | | | | | | | | | | | | | | | | | | | | |
| 06 | 07 | 14 | 15 | 16 | | 17 | 23 | | 24 | 25 | | | 26 | 27 | 31 | 32 | 33 | | | 34 | | 35 | 36 | 37 | | | 41 | 42 |
| 43 | 44 | 45 | 46 | 47 | | 51 | 52 | | 53 | 54 | | | 55 | 56 | 57 | 60 | 61 | | | 62 | | 63 | 64 | 65 | | | 66 | 67 |
| **Typical site forms according to Benning et al. (2015)** | | | | | | | | | | | | | | | | | | | | | | | | | | | | |
| **Water budget levels** | | | | | | | | **Trophy levels** | | | | | | | | | | **Relief/ Exposition** | | | | | | | | | | |
| T1, T2, T3, T4 | | | | | | | | o | | | | | | | | | | Sunny slope | | | | | | | | | | |
| **Typical community parameter ranges** | | | | | | | | | | | | | | | | | | | | | | | | | | | | |
| **Lower limit (fuzzy)** | | | | | | **Lower limit of optimum** | | | | | | | | **Upper limit of optimum** | | | | | | | | **Upper limit (fuzzy)** | | | | | | |
| **Base saturation (according to Kappen-Adrian) [%]** | | | | | | | | | | | | | | | | | | | | | | | | | | | | |
| 5 | | | | | | 9 | | | | | | | | 24 | | | | | | | | 28 | | | | | | |
| **pHH2O [-]** | | | | | | | | | | | | | | | | | | | | | | | | | | | | |
| 3.2 | | | | | | 3.5 | | | | | | | | 4.6 | | | | | | | | 4.9 | | | | | | |
| **C/N ratio in humus and 10 cm mineral soil layer [%C/%N]** | | | | | | | | | | | | | | | | | | | | | | | | | | | | |
| 18 | | | | | | 20 | | | | | | | | 30 | | | | | | | | 32 | | | | | | |
| **Volumetric water content in the rooted soil layer [%]** | | | | | | | | | | | | | | | | | | | | | | | | | | | | |
| 7 | | | | | | 10 | | | | | | | | 20 | | | | | | | | 23 | | | | | | |
| **Growing season length [d>10°TMT/a]** | | | | | | | | | | | | | | | | | | | | | | | | | | | | |
| 110 | | | | | | 123 | | | | | | | | 177 | | | | | | | | 190 | | | | | | |
| **Climatic water balance per vegetation month [mm/Veg.-Mon.]** | | | | | | | | | | | | | | | | | | | | | | | | | | | | |
| -22 | | | | | | -12 | | | | | | | | 65 | | | | | | | | 70 | | | | | | |
| **Solar radiation (PAR) in the growing season [kWh m-2 a-1]** | | | | | | | | | | | | **Lower limit (fuzzy)** | | | | | | | | | **Upper limit (fuzzy)** | | | | | | | |
| 332 | | | | | | | | | 566 | | | | | | | |
| **Lowest frost hardiness of all characteristic tree and shrub species (max. average annual low temperature) [°C]** | | | | | | | | | | | | | | | | | | | | | | | | | | -24 | | |
| **Natural/near-natural combination of species** | | | | | | | | | | | | | | | | | | | | | | | | | | | | |
| **Species** | | | | | **Areal fraction [%]** | | | | | | **Species (english)** | | | | | | | | **Structural element** | | | | | | | | | |
| Fagus sylvatica | | | | | 75 | | | | | | European beech | | | | | | | | Main tree species 1 | | | | | | | | | |
| Cladonia mitis | | | | | 1 | | | | | | Mild reindeer lichen | | | | | | | | Character lichen species | | | | | | | | | |
| Avenella flexuosa | | | | | 40 | | | | | | Wavy hairgrass | | | | | | | | Dominant herb species | | | | | | | | | |
| Carex pilulifera | | | | | 1 | | | | | | Pill sedge | | | | | | | | Character herb species | | | | | | | | | |
| Dicranum scoparium | | | | | 5 | | | | | | Common fork moss | | | | | | | | Dominant moss species | | | | | | | | | |
| Mnium hornum | | | | | 15 | | | | | | Swan-necked star moss | | | | | | | | Dominant moss species | | | | | | | | | |
| Polytrichum formosum | | | | | 15 | | | | | | Beauty haircap moss | | | | | | | | Dominant moss species | | | | | | | | | |
| Leucobryum glaucum | | | | | 30 | | | | | | Common white moss | | | | | | | | Dominant moss species | | | | | | | | | |

# **Endymio-Carpinetum betuli NOIRFALISE 1970**

| **Synonym** | | | | | | **1.Sources of the community relevées** | | | | | | | | | | | | | | | | | | | | **No. of relevées** | | |
| --- | --- | --- | --- | --- | --- | --- | --- | --- | --- | --- | --- | --- | --- | --- | --- | --- | --- | --- | --- | --- | --- | --- | --- | --- | --- | --- | --- | --- |
| **2. EUNIS-Code, mapped EUNIS class** | | | | | | | | | | | | | | | | | | | |
| Bluebell oak-Hornbeam forest | | | | | | 1. Härtle et al 2004 Tab. 16/1 (also Runge (1994) p. 284) | | | | | | | | | | | | | | | | | | | | 188 | | |
| 2. T1E16 - Sub-continental Quercus - Carpinus betulus forests | | | | | | | | | | | | | | | | | | | |
| **Possible climate classes** | | | | | | | | | | | | | | | | | | | | | | | | | | | | |
| 06 | 07 | 14 | 15 | 16 | | | 17 | 23 | | 24 | 25 | | | 26 | 27 | 31 | 32 | | 33 | | 34 | | 35 | 36 | 37 | | 41 | 42 |
| 43 | 44 | 45 | 46 | 47 | | | 51 | 52 | | 53 | 54 | | | 55 | 56 | 57 | 60 | | 61 | | 62 | | 63 | 64 | 65 | | 66 | 67 |
| **Typical site forms according to Benning et al. (2015)** | | | | | | | | | | | | | | | | | | | | | | | | | | | | |
| **Water budget levels** | | | | | | | | | **Trophy levels** | | | | | | | | | **Relief/ Exposition** | | | | | | | | | | |
| S1, S2, S3, S4 | | | | | | | | | e | | | | | | | | | Plane, Shady slope, Sunny slope | | | | | | | | | | |
| **Typical community parameter ranges** | | | | | | | | | | | | | | | | | | | | | | | | | | | | |
| **Lower limit (fuzzy)** | | | | | | | **Lower limit of optimum** | | | | | | | | **Upper limit of optimum** | | | | | | | | **Upper limit (fuzzy)** | | | | | |
| **Base saturation (according to Kappen-Adrian) [%]** | | | | | | | | | | | | | | | | | | | | | | | | | | | | |
| 23 | | | | | | | 36 | | | | | | | | 87 | | | | | | | | 100 | | | | | |
| **pHH2O [-]** | | | | | | | | | | | | | | | | | | | | | | | | | | | | |
| 4.5 | | | | | | | 4.9 | | | | | | | | 6.6 | | | | | | | | >7 | | | | | |
| **C/N ratio in humus and 10 cm mineral soil layer [%C/%N]** | | | | | | | | | | | | | | | | | | | | | | | | | | | | |
| 15 | | | | | | | 17 | | | | | | | | 24 | | | | | | | | 26 | | | | | |
| **Volumetric water content in the rooted soil layer [%]** | | | | | | | | | | | | | | | | | | | | | | | | | | | | |
| 8 | | | | | | | 23 | | | | | | | | 27 | | | | | | | | 28 | | | | | |
| **Growing season length [d>10°TMT/a]** | | | | | | | | | | | | | | | | | | | | | | | | | | | | |
| 140 | | | | | | | 156 | | | | | | | | 204 | | | | | | | | 220 | | | | | |
| **Climatic water balance per vegetation month [mm/Veg.-Mon.]** | | | | | | | | | | | | | | | | | | | | | | | | | | | | |
| 1 | | | | | | | 13 | | | | | | | | 47 | | | | | | | | 59 | | | | | |
| **Solar radiation (PAR) in the growing season [kWh m-2 a-1]** | | | | | | | | | | | | | **Lower limit (fuzzy)** | | | | | | | | | **Upper limit (fuzzy)** | | | | | | |
| 404 | | | | | | | | | 734 | | | | | | |
| **Lowest frost hardiness of all characteristic tree and shrub species (max. average annual low temperature) [°C]** | | | | | | | | | | | | | | | | | | | | | | | | | | -20 | | |
| **Natural/near-natural combination of species** | | | | | | | | | | | | | | | | | | | | | | | | | | | | |
| **Species** | | | | | **Areal fraction [%]** | | | | | | | **Species (english)** | | | | | | | | **Structural element** | | | | | | | | |
| Fraxinus excelsior | | | | | 20 | | | | | | | Common ash | | | | | | | | Mixed tree species | | | | | | | | |
| Fagus sylvatica | | | | | 10 | | | | | | | European beech | | | | | | | | Secondary tree species | | | | | | | | |
| Quercus robur | | | | | 10 | | | | | | | Pedunculate oak | | | | | | | | Secondary tree species | | | | | | | | |
| Carpinus betulus | | | | | 40 | | | | | | | European hornbeam | | | | | | | | Main tree species 1 | | | | | | | | |
| Acer pseudoplatanus | | | | | 40 | | | | | | | Golden sycamore | | | | | | | | Main tree species 2 | | | | | | | | |
| Narcissus pseudonarcissus | | | | | 3 | | | | | | | Daffodil | | | | | | | | Dominant herb species | | | | | | | | |
| Anemone nemorosa | | | | | 60 | | | | | | | Wood anemone | | | | | | | | Dominant herb species | | | | | | | | |
| Polygonatum multiflorum | | | | | 3 | | | | | | | Common Solomon’s-seal | | | | | | | | Dominant herb species | | | | | | | | |
| Hyacinthoides non-scripta | | | | | 40 | | | | | | | English bluebell | | | | | | | | Dominant herb species | | | | | | | | |
| Lamium galeobdolon | | | | | 60 | | | | | | | Yellow archangel | | | | | | | | Dominant herb species | | | | | | | | |
| Corylus avellana | | | | | 40 | | | | | | | Hazel | | | | | | | | Upper tree/shrub layer | | | | | | | | |
| Rubus fruticosus agg. | | | | | 15 | | | | | | | Real blackberry | | | | | | | | Upper tree/shrub layer | | | | | | | | |

# **Equiseto sylvatici-Abietetum albae MOOR 1952**

| **Synonym** | | | | | **1.Sources of the community relevées** | | | | | | | | | | | | | | | | | | | | | **No. of relevées** | | | |
| --- | --- | --- | --- | --- | --- | --- | --- | --- | --- | --- | --- | --- | --- | --- | --- | --- | --- | --- | --- | --- | --- | --- | --- | --- | --- | --- | --- | --- | --- |
| **2. EUNIS-Code, mapped EUNIS class** | | | | | | | | | | | | | | | | | | | | |
| Horsetail-Fir forest | | | | | 1. Willner et Grabherr (2007) Vol 1 p. 199 et Table 33/16 (also Mucina et al. (1993) Teil III, S.324; Ellenberg et Klötzli 1972 p. 718) | | | | | | | | | | | | | | | | | | | | | 117 | | | |
| 2. T3212, T32 - Temperate mountain Abies forest | | | | | | | | | | | | | | | | | | | | |
| **Possible climate classes** | | | | | | | | | | | | | | | | | | | | | | | | | | | | | |
| 06 | 07 | 14 | 15 | 16 | | | 17 | 23 | | 24 | 25 | | | 26 | 27 | 31 | 32 | | 33 | | 34 | | 35 | 36 | 37 | | | 41 | 42 |
| 43 | 44 | 45 | 46 | 47 | | | 51 | 52 | | 53 | 54 | | | 55 | 56 | 57 | 60 | | 61 | | 62 | | 63 | 64 | 65 | | | 66 | 67 |
| **Typical site forms according to Benning et al. (2015)** | | | | | | | | | | | | | | | | | | | | | | | | | | | | | |
| **Water budget levels** | | | | | | | | | **Trophy levels** | | | | | | | | | | | **Relief/ Exposition** | | | | | | | | | |
| S0, S1, S2, S3, S4 | | | | | | | | | mo, m | | | | | | | | | | | Plane, Sunny slope | | | | | | | | | |
| **Typical community parameter ranges** | | | | | | | | | | | | | | | | | | | | | | | | | | | | | |
| **Lower limit (fuzzy)** | | | | | | | **Lower limit of optimum** | | | | | | | | **Upper limit of optimum** | | | | | | | | **Upper limit (fuzzy)** | | | | | | |
| **Base saturation (according to Kappen-Adrian) [%]** | | | | | | | | | | | | | | | | | | | | | | | | | | | | | |
| 13 | | | | | | | 18 | | | | | | | | 40 | | | | | | | | 45 | | | | | | |
| **pHH2O [-]** | | | | | | | | | | | | | | | | | | | | | | | | | | | | | |
| 3.8 | | | | | | | 4.2 | | | | | | | | 5.8 | | | | | | | | 6.2 | | | | | | |
| **C/N ratio in humus and 10 cm mineral soil layer [%C/%N]** | | | | | | | | | | | | | | | | | | | | | | | | | | | | | |
| 15 | | | | | | | 18 | | | | | | | | 28 | | | | | | | | 31 | | | | | | |
| **Volumetric water content in the rooted soil layer [%]** | | | | | | | | | | | | | | | | | | | | | | | | | | | | | |
| 16 | | | | | | | 24 | | | | | | | | 27 | | | | | | | | 28 | | | | | | |
| **Growing season length [d>10°TMT/a]** | | | | | | | | | | | | | | | | | | | | | | | | | | | | | |
| 90 | | | | | | | 101 | | | | | | | | 144 | | | | | | | | 155 | | | | | | |
| **Climatic water balance per vegetation month [mm/Veg.-Mon.]** | | | | | | | | | | | | | | | | | | | | | | | | | | | | | |
| -8 | | | | | | | 0 | | | | | | | | 241 | | | | | | | | 291 | | | | | | |
| **Solar radiation (PAR) in the growing season [kWh m-2 a-1]** | | | | | | | | | | | | | **Lower limit (fuzzy)** | | | | | | | | | **Upper limit (fuzzy)** | | | | | | | |
| 341 | | | | | | | | | 585 | | | | | | | |
| **Lowest frost hardiness of all characteristic tree and shrub species (max. average annual low temperature) [°C]** | | | | | | | | | | | | | | | | | | | | | | | | | | | -28 | | |
| **Natural/near-natural combination of species** | | | | | | | | | | | | | | | | | | | | | | | | | | | | | |
| **Species** | | | | | | **Areal fraction [%]** | | | | | | **Species (english)** | | | | | | **Structural element** | | | | | | | | | | |
| Pinus cembra | | | | | | 3 | | | | | | Pinus cembra | | | | | | Mixed tree species | | | | | | | | | | |
| Abies alba | | | | | | 30 | | | | | | Silver fir | | | | | | Main tree species 2 | | | | | | | | | | |
| Picea abies | | | | | | 50 | | | | | | Norway spruce | | | | | | Main tree species 1 | | | | | | | | | | |
| Sorbus aucuparia | | | | | | 1 | | | | | | Mountain-ash | | | | | | Intermediate tree layer | | | | | | | | | | |
| Deschampsia cespitosa | | | | | | 5 | | | | | | Tussock hairgrass | | | | | | Dominant herb species | | | | | | | | | | |
| Chaerophyllum hirsutum | | | | | | 5 | | | | | | Hairy chervil | | | | | | Dominant herb species | | | | | | | | | | |
| Oxalis acetosella | | | | | | 25 | | | | | | Wood sorrel | | | | | | Dominant herb species | | | | | | | | | | |
| Athyrium filix-femina | | | | | | 5 | | | | | | Common lady-fern | | | | | | Dominant herb species | | | | | | | | | | |
| Gymnocarpium dryopteris | | | | | | 5 | | | | | | Common oak fern | | | | | | Dominant herb species | | | | | | | | | | |

# **Erico carnae-Pinetum prostratae ZÖTTL 1951**

| **Synonym** | | | | **1.Sources of the community relevées** | | | | | | | | | | | | | | | | | | | | | | **No. of relevées** | | | |
| --- | --- | --- | --- | --- | --- | --- | --- | --- | --- | --- | --- | --- | --- | --- | --- | --- | --- | --- | --- | --- | --- | --- | --- | --- | --- | --- | --- | --- | --- |
| **2. EUNIS-Code, mapped EUNIS class** | | | | | | | | | | | | | | | | | | | | | |
| Winter heath- Mountain pine shrub | | | | 1. Willner et Grabherr (2007) Vol 1 p. 211 et Table 44/1-2 (also Mucina et al. (1993) Teil III, p. 264; Ellenberg et Klötzli 1972 p.754 with Keller et al. 1998; Schmider et Burnand 1988 p. 158) | | | | | | | | | | | | | | | | | | | | | | 127 | | | |
| 2. S26 - Subalpine Pinus mugo scrub | | | | | | | | | | | | | | | | | | | | | |
| **Possible climate classes** | | | | | | | | | | | | | | | | | | | | | | | | | | | | | |
| 06 | 07 | 14 | 15 | | 16 | | 17 | 23 | | 24 | 25 | | | 26 | 27 | 31 | 32 | 33 | | | 34 | | 35 | 36 | 37 | | | 41 | 42 |
| 43 | 44 | 45 | 46 | | 47 | | 51 | 52 | | 53 | 54 | | | 55 | 56 | 57 | 60 | 61 | | | 62 | | 63 | 64 | 65 | | | 66 | 67 |
| **Typical site forms according to Benning et al. (2015)** | | | | | | | | | | | | | | | | | | | | | | | | | | | | | |
| **Water budget levels** | | | | | | | | | **Trophy levels** | | | | | | | | | | **Relief/ Exposition** | | | | | | | | | | |
| T1, T2, T3, T4, T5 | | | | | | | | | mo, e | | | | | | | | | | Sunny slope | | | | | | | | | | |
| **Typical community parameter ranges** | | | | | | | | | | | | | | | | | | | | | | | | | | | | | |
| **Lower limit (fuzzy)** | | | | | | | **Lower limit of optimum** | | | | | | | | **Upper limit of optimum** | | | | | | | | **Upper limit (fuzzy)** | | | | | | |
| **Base saturation (according to Kappen-Adrian) [%]** | | | | | | | | | | | | | | | | | | | | | | | | | | | | | |
| 23 | | | | | | | 38 | | | | | | | | 100 | | | | | | | | 100 | | | | | | |
| **pHH2O [-]** | | | | | | | | | | | | | | | | | | | | | | | | | | | | | |
| 4.5 | | | | | | | 5.2 | | | | | | | | 7.3 | | | | | | | | 8 | | | | | | |
| **C/N ratio in humus and 10 cm mineral soil layer [%C/%N]** | | | | | | | | | | | | | | | | | | | | | | | | | | | | | |
| 18 | | | | | | | 20 | | | | | | | | 29 | | | | | | | | 31 | | | | | | |
| **Volumetric water content in the rooted soil layer [%]** | | | | | | | | | | | | | | | | | | | | | | | | | | | | | |
| 6 | | | | | | | 8 | | | | | | | | 15 | | | | | | | | 17 | | | | | | |
| **Growing season length [d>10°TMT/a]** | | | | | | | | | | | | | | | | | | | | | | | | | | | | | |
| 55 | | | | | | | 68 | | | | | | | | 118 | | | | | | | | 130 | | | | | | |
| **Climatic water balance per vegetation month [mm/Veg.-Mon.]** | | | | | | | | | | | | | | | | | | | | | | | | | | | | | |
| 11 | | | | | | | 25 | | | | | | | | 244 | | | | | | | | 291 | | | | | | |
| **Solar radiation (PAR) in the growing season [kWh m-2 a-1]** | | | | | | | | | | | | | **Lower limit (fuzzy)** | | | | | | | | | **Upper limit (fuzzy)** | | | | | | | |
| 235 | | | | | | | | | 537 | | | | | | | |
| **Lowest frost hardiness of all characteristic tree and shrub species (max. average annual low temperature) [°C]** | | | | | | | | | | | | | | | | | | | | | | | | | | | -40 | | |
| **Natural/near-natural combination of species** | | | | | | | | | | | | | | | | | | | | | | | | | | | | | |
| **Species** | | | | | | **Areal fraction [%]** | | | | | | **Species (english)** | | | | | | | | **Structural element** | | | | | | | | | |
| Pinus mugo prostrata | | | | | | 75 | | | | | | Mountain pine | | | | | | | | Main tree species 1 | | | | | | | | | |
| Sesleria albicans | | | | | | 1 | | | | | | Blue moor-grass | | | | | | | | Character herb species | | | | | | | | | |
| Calamagrostis varia | | | | | | 15 | | | | | | Colored reedgrass | | | | | | | | Dominant herb species | | | | | | | | | |
| Erica carnea | | | | | | 25 | | | | | | Winter heath | | | | | | | | Dominant herb species | | | | | | | | | |
| Vaccinium vitis-idaea | | | | | | 15 | | | | | | Cowberry | | | | | | | | Dominant herb species | | | | | | | | | |
| Rhododendron hirsutum | | | | | | 15 | | | | | | Hairy Alpine rose | | | | | | | | Intermediate tree layer | | | | | | | | | |

# **Erico carnae-Pinetum uncinatae BRAUN-BLANQUET et al. 1939**

| **Synonym** | | | | **1.Sources of the community relevées** | | | | | | | | | | | | | | | | | | | | | | | **No. of relevées** | | | |
| --- | --- | --- | --- | --- | --- | --- | --- | --- | --- | --- | --- | --- | --- | --- | --- | --- | --- | --- | --- | --- | --- | --- | --- | --- | --- | --- | --- | --- | --- | --- |
| **2. EUNIS-Code, mapped EUNIS class** | | | | | | | | | | | | | | | | | | | | | | |
| Winter heath- Hook pine wood | | | | 1. Willner et Grabherr (2007) Vol 1 p. 213 et Tab. 44/9 (also Mucina et al. (1993) Teil III, p. 268 | | | | | | | | | | | | | | | | | | | | | | | 38 | | | |
| 2. T348 - T34-Temperate subalpine Larix, Pinus cembra and Pinus uncinata forest | | | | | | | | | | | | | | | | | | | | | | |
| **Possible climate classes** | | | | | | | | | | | | | | | | | | | | | | | | | | | | | | |
| 06 | 07 | 14 | 15 | | 16 | | 17 | | | 23 | 24 | 25 | | | 26 | 27 | 31 | 32 | 33 | | | 34 | | 35 | 36 | 37 | | | 41 | 42 |
| 43 | 44 | 45 | 46 | | 47 | | 51 | | | 52 | 53 | 54 | | | 55 | 56 | 57 | 60 | 61 | | | 62 | | 63 | 64 | 65 | | | 66 | 67 |
| **Typical site forms according to Benning et al. (2015)** | | | | | | | | | | | | | | | | | | | | | | | | | | | | | | |
| **Water budget levels** | | | | | | | | | **Trophy levels** | | | | | | | | | | | **Relief/ Exposition** | | | | | | | | | | |
| T1, T2, T3, T4, T5 | | | | | | | | mo | | | | | | | | | | | | | Sunny slope | | | | | | | | | |
| **Typical community parameter ranges** | | | | | | | | | | | | | | | | | | | | | | | | | | | | | | |
| **Lower limit (fuzzy)** | | | | | | | **Lower limit of optimum** | | | | | | | | | **Upper limit of optimum** | | | | | | | | **Upper limit (fuzzy)** | | | | | | |
| **Base saturation (according to Kappen-Adrian) [%]** | | | | | | | | | | | | | | | | | | | | | | | | | | | | | | |
| 28 | | | | | | | 42 | | | | | | | | | 100 | | | | | | | | 100 | | | | | | |
| **pHH2O [-]** | | | | | | | | | | | | | | | | | | | | | | | | | | | | | | |
| 5 | | | | | | | 5.6 | | | | | | | | | 7.4 | | | | | | | | 8 | | | | | | |
| **C/N ratio in humus and 10 cm mineral soil layer [%C/%N]** | | | | | | | | | | | | | | | | | | | | | | | | | | | | | | |
| 18 | | | | | | | 19 | | | | | | | | | 25 | | | | | | | | 26 | | | | | | |
| **Volumetric water content in the rooted soil layer [%]** | | | | | | | | | | | | | | | | | | | | | | | | | | | | | | |
| 6 | | | | | | | 8 | | | | | | | | | 15 | | | | | | | | 17 | | | | | | |
| **Growing season length [d>10°TMT/a]** | | | | | | | | | | | | | | | | | | | | | | | | | | | | | | |
| 80 | | | | | | | 88 | | | | | | | | | 118 | | | | | | | | 125 | | | | | | |
| **Climatic water balance per vegetation month [mm/Veg.-Mon.]** | | | | | | | | | | | | | | | | | | | | | | | | | | | | | | |
| 6 | | | | | | | 7 | | | | | | | | | 43 | | | | | | | | 50 | | | | | | |
| **Solar radiation (PAR) in the growing season [kWh m-2 a-1]** | | | | | | | | | | | | | | **Lower limit (fuzzy)** | | | | | | | | | **Upper limit (fuzzy)** | | | | | | | |
| 330 | | | | | | | | | 526 | | | | | | | |
| **Lowest frost hardiness of all characteristic tree and shrub species (max. average annual low temperature) [°C]** | | | | | | | | | | | | | | | | | | | | | | | | | | | | -40 | | |
| **Natural/near-natural combination of species** | | | | | | | | | | | | | | | | | | | | | | | | | | | | | | |
| **Species** | | | | | | **Areal fraction [%]** | | | | | | | **Species (english)** | | | | | | | **Structural element** | | | | | | | | | | |
| Pinus mugo uncinata | | | | | | 30 | | | | | | | Hook pine | | | | | | | Main tree species 1Schicht 1) | | | | | | | | | | |
| Calamagrostis varia | | | | | | 15 | | | | | | | Colored reedgrass | | | | | | | Dominant herb species | | | | | | | | | | |
| Erica carnea | | | | | | 25 | | | | | | | Winter heath | | | | | | | Dominant herb species | | | | | | | | | | |
| Juniperus communis | | | | | | 5 | | | | | | | Common juniper | | | | | | | Upper tree/shrub layer | | | | | | | | | | |
| Rubus saxatilis | | | | | | 2 | | | | | | | Stone bramble | | | | | | | Upper tree/shrub layer | | | | | | | | | | |
| Rhododendron hirsutum | | | | | | 2 | | | | | | | Hairy Alpine rose | | | | | | | Upper tree/shrub layer | | | | | | | | | | |

# **Erico carneae-Rhododendretum hirsuti OBERDORFER 1967**

| **Synonym** | | | | | | | | | | | | **1.Sources of the community relevées** | | | | | | | | | | | | | | | | | | **No. of relevées** | | | |
| --- | --- | --- | --- | --- | --- | --- | --- | --- | --- | --- | --- | --- | --- | --- | --- | --- | --- | --- | --- | --- | --- | --- | --- | --- | --- | --- | --- | --- | --- | --- | --- | --- | --- |
| **2. EUNIS-Code, mapped EUNIS class** | | | | | | | | | | | | | | | | | |
| Winter heath- Alpine rose bush  Rhododendro hirsuti-Pinetum mugo Br.-Bl. et al. 1939 nom. invers. propos. | | | | | | | | | | | | 1. Oberdorfer (1992) Vol IV, Tab. 256/1a and Text Vol. p. 43 (also Runge (1994) p. 239) | | | | | | | | | | | | | | | | | | 105 | | | |
| 2. S2221, S26 - Subalpine Pinus mugo scrub | | | | | | | | | | | | | | | | | |
| **Possible climate classes** | | | | | | | | | | | | | | | | | | | | | | | | | | | | | | | | | |
| 06 | 07 | 14 | 15 | | | 16 | 17 | | 23 | | 24 | | 25 | 26 | | 27 | | | 31 | 32 | 33 | | | 34 | | 35 | | 36 | 37 | | | 41 | 42 |
| 43 | 44 | 45 | 46 | | | 47 | 51 | | 52 | | 53 | | 54 | 55 | | 56 | | | 57 | 60 | 61 | | | 62 | | 63 | | 64 | 65 | | | 66 | 67 |
| **Typical site forms according to Benning et al. (2015)** | | | | | | | | | | | | | | | | | | | | | | | | | | | | | | | | | |
| **Water budget levels** | | | | | | | | | | **Trophy levels** | | | | | | | | | | | | | **Relief/ Exposition** | | | | | | | | | | |
| T1, T2, T3, T4, T5 | | | | | | | | | | mo | | | | | | | | | | | | | Plane, Shady slope, Sunny slope | | | | | | | | | | |
| **Typical community parameter ranges** | | | | | | | | | | | | | | | | | | | | | | | | | | | | | | | | | |
| **Lower limit (fuzzy)** | | | | **Lower limit of optimum** | | | | | | | | | | | | | | **Upper limit of optimum** | | | | | | | | | **Upper limit (fuzzy)** | | | | | | |
| **Base saturation (according to Kappen-Adrian) [%]** | | | | | | | | | | | | | | | | | | | | | | | | | | | | | | | | | |
| 23 | | | | 38 | | | | | | | | | | | | | | 100 | | | | | | | | | 100 | | | | | | |
| **pHH2O [-]** | | | | | | | | | | | | | | | | | | | | | | | | | | | | | | | | | |
| 4.5 | | | | | 5.2 | | | | | | | | | | | | | 7.3 | | | | | | | | | 8 | | | | | | |
| **C/N ratio in humus and 10 cm mineral soil layer [%C/%N]** | | | | | | | | | | | | | | | | | | | | | | | | | | | | | | | | | |
| 18 | | | | 20 | | | | | | | | | | | | | | 29 | | | | | | | | | 31 | | | | | | |
| **Volumetric water content in the rooted soil layer [%]** | | | | | | | | | | | | | | | | | | | | | | | | | | | | | | | | | |
| 6 | | | | 8 | | | | | | | | | | | | | | 15 | | | | | | | | | 17 | | | | | | |
| **Growing season length [d>10°TMT/a]** | | | | | | | | | | | | | | | | | | | | | | | | | | | | | | | | | |
| 55 | | | | 68 | | | | | | | | | | | | | | 118 | | | | | | | | | 130 | | | | | | |
| **Climatic water balance per vegetation month [mm/Veg.-Mon.]** | | | | | | | | | | | | | | | | | | | | | | | | | | | | | | | | | |
| 11 | | | | 25 | | | | | | | | | | | | | | 244 | | | | | | | | | 291 | | | | | | |
| **Solar radiation (PAR) in the growing season [kWh m-2 a-1]** | | | | | | | | | | | | | | | **Lower limit (fuzzy)** | | | | | | | | | | **Upper limit (fuzzy)** | | | | | | | | |
| 231 | | | | | | | | | | 522 | | | | | | | | |
| **Lowest frost hardiness of all characteristic tree and shrub species (max. average annual low temperature) [°C]** | | | | | | | | | | | | | | | | | | | | | | | | | | | | | | | -40 | | |
| **Natural/near-natural combination of species** | | | | | | | | | | | | | | | | | | | | | | | | | | | | | | | | | |
| **Species** | | | | | | | | **Areal fraction [%]** | | | | | | | | | **Species (english)** | | | | | **Structural element** | | | | | | | | | | | |
| Pinus mugo mugo | | | | | | | | 20 | | | | | | | | | Mountain pine | | | | | Main tree species 1 | | | | | | | | | | | |
| Erica carnea | | | | | | | | 30 | | | | | | | | | Winter heath | | | | | Dominant herb species | | | | | | | | | | | |
| Hylocomium splendens | | | | | | | | 5 | | | | | | | | | Stack moss | | | | | Dominant moss species | | | | | | | | | | | |
| Rhytidiadelphus triquetrus | | | | | | | | 5 | | | | | | | | | Great rim moss | | | | | Dominant moss species | | | | | | | | | | | |
| Rhododendron hirsutum | | | | | | | | 60 | | | | | | | | | Hairy Alpine rose | | | | | Upper tree/shrub layer | | | | | | | | | | | |
| Sorbus chamaemespilus | | | | | | | | 5 | | | | | | | | | Dwarf whitebeam | | | | | Upper tree/shrub layer | | | | | | | | | | | |

# **Erico scopariae-Pinetum pinastri BIONDI et VAGGE 2015**

| **Synonym** | | | | **1.Sources of the community relevées** | | | | | | | | | | | | | | | | | | | | | **No. of relevées** | | | |
| --- | --- | --- | --- | --- | --- | --- | --- | --- | --- | --- | --- | --- | --- | --- | --- | --- | --- | --- | --- | --- | --- | --- | --- | --- | --- | --- | --- | --- |
| **2. EUNIS-Code, mapped EUNIS class** | | | | | | | | | | | | | | | | | | | | |
| Shrub heath- Maritime pine forest | | | | 1. Biondi et Vagge 2015 Tab. 1 (also: Ciaramella et al. 2024 fig. 3 + supl. 2) | | | | | | | | | | | | | | | | | | | | | 27 | | | |
| 2. T3A211 - Northern-Iberian mesogean pine forests | | | | | | | | | | | | | | | | | | | | |
| **Possible climate classes** | | | | | | | | | | | | | | | | | | | | | | | | | | | | |
| 06 | 07 | 14 | 15 | | 16 | | 17 | 23 | 24 | 25 | | | 26 | 27 | 31 | 32 | 33 | | | 34 | | 35 | 36 | 37 | | | 41 | 42 |
| 43 | 44 | 45 | 46 | | 47 | | 51 | 52 | 53 | 54 | | | 55 | 56 | 57 | 60 | 61 | | | 62 | | 63 | 64 | 65 | | | 66 | 67 |
| **Typical site forms according to Benning et al. (2015)** | | | | | | | | | | | | | | | | | | | | | | | | | | | | |
| **Water budget levels** | | | | | | | | **Trophy levels** | | | | | | | | | | **Relief/ Exposition** | | | | | | | | | | |
| T1, T2 | | | | | | | | e | | | | | | | | | | Plane, Shady slope, Sunny slope | | | | | | | | | | |
| **Typical community parameter ranges** | | | | | | | | | | | | | | | | | | | | | | | | | | | | |
| **Lower limit (fuzzy)** | | | | | | | **Lower limit of optimum** | | | | | | | **Upper limit of optimum** | | | | | | | | **Upper limit (fuzzy)** | | | | | | |
| **Base saturation (according to Kappen-Adrian) [%]** | | | | | | | | | | | | | | | | | | | | | | | | | | | | |
| 37 | | | | | | | 50 | | | | | | | 87 | | | | | | | | 100 | | | | | | |
| **pHH2O [-]** | | | | | | | | | | | | | | | | | | | | | | | | | | | | |
| 5.8 | | | | | | | 6.0 | | | | | | | 6.6 | | | | | | | | 6.8 | | | | | | |
| **C/N ratio in humus and 10 cm mineral soil layer [%C/%N]** | | | | | | | | | | | | | | | | | | | | | | | | | | | | |
| 15 | | | | | | | 16 | | | | | | | 21 | | | | | | | | 22 | | | | | | |
| **Volumetric water content in the rooted soil layer [%]** | | | | | | | | | | | | | | | | | | | | | | | | | | | | |
| 9 | | | | | | | 10 | | | | | | | 12 | | | | | | | | 13 | | | | | | |
| **Growing season length [d>10°TMT/a]** | | | | | | | | | | | | | | | | | | | | | | | | | | | | |
| 220 | | | | | | | 228 | | | | | | | 252 | | | | | | | | 260 | | | | | | |
| **Climatic water balance per vegetation month [mm/Veg.-Mon.]** | | | | | | | | | | | | | | | | | | | | | | | | | | | | |
| -17 | | | | | | | -7 | | | | | | | 25 | | | | | | | | 35 | | | | | | |
| **Solar radiation (PAR) in the growing season [kWh m-2 a-1]** | | | | | | | | | | | | **Lower limit (fuzzy)** | | | | | | | | | **Upper limit (fuzzy)** | | | | | | | |
| 825 | | | | | | | | | 864 | | | | | | | |
| **Lowest frost hardiness of all characteristic tree and shrub species (max. average annual low temperature) [°C]** | | | | | | | | | | | | | | | | | | | | | | | | | | -12 | | |
| **Natural/near-natural combination of species** | | | | | | | | | | | | | | | | | | | | | | | | | | | | |
| **Species** | | | | | | **Areal fraction [%]** | | | | | **Species (english)** | | | | | | | | **Structural element** | | | | | | | | | |
| Fraxinus ornus | | | | | | 1 | | | | | Manna ash | | | | | | | | Secondary tree species | | | | | | | | | |
| Quercus pubescens | | | | | | 1 | | | | | Downy oak | | | | | | | | Secondary tree species | | | | | | | | | |
| Pinus pinaster | | | | | | 60 | | | | | Maritime pine | | | | | | | | Main tree species 1 | | | | | | | | | |
| Calluna vulgaris | | | | | | 5 | | | | | Scotch heather | | | | | | | | Dominant herb species | | | | | | | | | |
| Pistacia terebinthus | | | | | | 2 | | | | | Turpentine tree | | | | | | | | Upper tree/shrub layer | | | | | | | | | |
| Rhamnus alaternus | | | | | | 5 | | | | | Mediterranean buckthorn | | | | | | | | Upper tree/shrub layer | | | | | | | | | |
| Smilax Aspenra | | | | | | 2 | | | | | Rough bindweed | | | | | | | | Upper tree/shrub layer | | | | | | | | | |
| Juniperus oxycedrus | | | | | | 5 | | | | | Prickly juniper | | | | | | | | Upper tree/shrub layer | | | | | | | | | |
| Cistus salvifolius | | | | | | 2 | | | | | Sage-leaved rockrose | | | | | | | | Upper tree/shrub layer | | | | | | | | | |
| Erica scoparia | | | | | | 30 | | | | | Shrub heath | | | | | | | | Upper tree/shrub layer | | | | | | | | | |
| Erica arborea | | | | | | 60 | | | | | Tree heath | | | | | | | | Upper tree/shrub layer | | | | | | | | | |

# **Eriophoro-Betuletum pubescentis (HUECK 1925) PASSARGE et HOFMANN 1968**

| **Synonym** | | | | **1.Sources of the community relevées** | | | | | | | | | | | | | | | | | | | | | | **No. of relevées** | | | |
| --- | --- | --- | --- | --- | --- | --- | --- | --- | --- | --- | --- | --- | --- | --- | --- | --- | --- | --- | --- | --- | --- | --- | --- | --- | --- | --- | --- | --- | --- |
| **2. EUNIS-Code, mapped EUNIS class** | | | | | | | | | | | | | | | | | | | | | |
| Cotton grass-Moor birch forest | | | | 1. Passarge et Hofmann (1968) Tab. 33c (also Schmidt (2002) 12.1, Tab. 2/9/1) | | | | | | | | | | | | | | | | | | | | | | 65 | | | |
| 2. T161, T16 - Broadleaved mire forest on acid peat | | | | | | | | | | | | | | | | | | | | | |
| **Possible climate classes** | | | | | | | | | | | | | | | | | | | | | | | | | | | | | |
| 06 | 07 | 14 | 15 | | 16 | | 17 | 23 | | 24 | 25 | | | 26 | 27 | 31 | 32 | 33 | | | 34 | | 35 | 36 | 37 | | | 41 | 42 |
| 43 | 44 | 45 | 46 | | 47 | | 51 | 52 | | 53 | 54 | | | 55 | 56 | 57 | 60 | 61 | | | 62 | | 63 | 64 | 65 | | | 66 | 67 |
| **Typical site forms according to Benning et al. (2015)** | | | | | | | | | | | | | | | | | | | | | | | | | | | | | |
| **Water budget levels** | | | | | | | | | **Trophy levels** | | | | | | | | | | | **Relief/ Exposition** | | | | | | | | | |
| G5 | | | | | | | | | d | | | | | | | | | | | Plane | | | | | | | | | |
| **Typical community parameter ranges** | | | | | | | | | | | | | | | | | | | | | | | | | | | | | |
| **Lower limit (fuzzy)** | | | | | | | **Lower limit of optimum** | | | | | | | | **Upper limit of optimum** | | | | | | | | **Upper limit (fuzzy)** | | | | | | |
| **Base saturation (according to Kappen-Adrian) [%]** | | | | | | | | | | | | | | | | | | | | | | | | | | | | | |
| 4 | | | | | | | 8 | | | | | | | | 22 | | | | | | | | 26 | | | | | | |
| **pHH2O [-]** | | | | | | | | | | | | | | | | | | | | | | | | | | | | | |
| 3.1 | | | | | | | 3.4 | | | | | | | | 4.5 | | | | | | | | 4.8 | | | | | | |
| **C/N ratio in humus and 10 cm mineral soil layer [%C/%N]** | | | | | | | | | | | | | | | | | | | | | | | | | | | | | |
| 18 | | | | | | | 25 | | | | | | | | 53 | | | | | | | | 60 | | | | | | |
| **Volumetric water content in the rooted soil layer [%]** | | | | | | | | | | | | | | | | | | | | | | | | | | | | | |
| 35 | | | | | | | 50 | | | | | | | | 55 | | | | | | | | 60 | | | | | | |
| **Growing season length [d>10°TMT/a]** | | | | | | | | | | | | | | | | | | | | | | | | | | | | | |
| 115 | | | | | | | 133 | | | | | | | | 203 | | | | | | | | 220 | | | | | | |
| **Climatic water balance per vegetation month [mm/Veg.-Mon.]** | | | | | | | | | | | | | | | | | | | | | | | | | | | | | |
| -27 | | | | | | | -11 | | | | | | | | 65 | | | | | | | | 70 | | | | | | |
| **Solar radiation (PAR) in the growing season [kWh m-2 a-1]** | | | | | | | | | | | | | **Lower limit (fuzzy)** | | | | | | | | | **Upper limit (fuzzy)** | | | | | | | |
| 331 | | | | | | | | | 576 | | | | | | | |
| **Lowest frost hardiness of all characteristic tree and shrub species (max. average annual low temperature) [°C]** | | | | | | | | | | | | | | | | | | | | | | | | | | | -36 | | |
| **Natural/near-natural combination of species** | | | | | | | | | | | | | | | | | | | | | | | | | | | | | |
| **Species** | | | | | | **Areal fraction [%]** | | | | | | **Species (english)** | | | | | | | **Structural element** | | | | | | | | | | |
| Betula pubescens | | | | | | 20 | | | | | | Downy birch | | | | | | | Main tree species 1 | | | | | | | | | | |
| Betula pendula | | | | | | 5 | | | | | | Silver birch | | | | | | | Mixed tree species | | | | | | | | | | |
| Pinus sylvestris | | | | | | 5 | | | | | | Scotch pine | | | | | | | Main tree species 2 | | | | | | | | | | |
| Eriophorum vaginatum | | | | | | 20 | | | | | | Tussock cotton-grass | | | | | | | Dominant herb species | | | | | | | | | | |
| Menyanthes trifoliata | | | | | | 2 | | | | | | Bogbean | | | | | | | Dominant herb species | | | | | | | | | | |
| Scleropodium purum | | | | | | 5 | | | | | | Common green stem moss | | | | | | | Dominant moss species | | | | | | | | | | |
| Pleurozium schreberi | | | | | | 5 | | | | | | Red stem moss | | | | | | | Dominant moss species | | | | | | | | | | |
| Sphagnum palustre | | | | | | 5 | | | | | | Swamp peat moss | | | | | | | Dominant moss species | | | | | | | | | | |

# **Eriophoro-Pinetum sylvestris (HUECK 1925) PASSARGE et HOFMANN 1968**

| **Synonym** | | | | **1.Sources of the community relevées** | | | | | | | | | | | | | | | | | | | | | | **No. of relevées** | | | |
| --- | --- | --- | --- | --- | --- | --- | --- | --- | --- | --- | --- | --- | --- | --- | --- | --- | --- | --- | --- | --- | --- | --- | --- | --- | --- | --- | --- | --- | --- |
| **2. EUNIS-Code, mapped EUNIS class** | | | | | | | | | | | | | | | | | | | | | |
| Cotton grass- Pine swamp forest | | | | Passarge et Hofmann (1968) Table 35d (also (also: Chytry et al. 2011 tab. 16/1 p. 724+718) | | | | | | | | | | | | | | | | | | | | | | 36 | | | |
| 2. T3J5 - Nemoral Pinus sylvestris mire forests | | | | | | | | | | | | | | | | | | | | | |
| **Possible climate classes** | | | | | | | | | | | | | | | | | | | | | | | | | | | | | |
| 06 | 07 | 14 | 15 | | 16 | | 17 | 23 | | 24 | 25 | | | 26 | 27 | 31 | 32 | 33 | | | 34 | | 35 | 36 | 37 | | | 41 | 42 |
| 43 | 44 | 45 | 46 | | 47 | | 51 | 52 | | 53 | 54 | | | 55 | 56 | 57 | 60 | 61 | | | 62 | | 63 | 64 | 65 | | | 66 | 67 |
| **Typical site forms according to Benning et al. (2015)** | | | | | | | | | | | | | | | | | | | | | | | | | | | | | |
| **Water budget levels** | | | | | | | | | **Trophy levels** | | | | | | | | | | | **Relief/ Exposition** | | | | | | | | | |
| G5 | | | | | | | | | d | | | | | | | | | | | Plane | | | | | | | | | |
| **Typical community parameter ranges** | | | | | | | | | | | | | | | | | | | | | | | | | | | | | |
| **Lower limit (fuzzy)** | | | | | | | **Lower limit of optimum** | | | | | | | | **Upper limit of optimum** | | | | | | | | **Upper limit (fuzzy)** | | | | | | |
| **Base saturation (according to Kappen-Adrian) [%]** | | | | | | | | | | | | | | | | | | | | | | | | | | | | | |
| 4 | | | | | | | 8 | | | | | | | | 22 | | | | | | | | 26 | | | | | | |
| **pHH2O [-]** | | | | | | | | | | | | | | | | | | | | | | | | | | | | | |
| 3.1 | | | | | | | 3.4 | | | | | | | | 4.5 | | | | | | | | 4.8 | | | | | | |
| **C/N ratio in humus and 10 cm mineral soil layer [%C/%N]** | | | | | | | | | | | | | | | | | | | | | | | | | | | | | |
| 20 | | | | | | | 27 | | | | | | | | 53 | | | | | | | | 60 | | | | | | |
| **Volumetric water content in the rooted soil layer [%]** | | | | | | | | | | | | | | | | | | | | | | | | | | | | | |
| 50 | | | | | | | 50 | | | | | | | | 55 | | | | | | | | 60 | | | | | | |
| **Growing season length [d>10°TMT/a]** | | | | | | | | | | | | | | | | | | | | | | | | | | | | | |
| 115 | | | | | | | 131 | | | | | | | | 194 | | | | | | | | 210 | | | | | | |
| **Climatic water balance per vegetation month [mm/Veg.-Mon.]** | | | | | | | | | | | | | | | | | | | | | | | | | | | | | |
| -46 | | | | | | | -42 | | | | | | | | 2 | | | | | | | | 11 | | | | | | |
| **Solar radiation (PAR) in the growing season [kWh m-2 a-1]** | | | | | | | | | | | | | **Lower limit (fuzzy)** | | | | | | | | | **Upper limit (fuzzy)** | | | | | | | |
| 334 | | | | | | | | | 716 | | | | | | | |
| **Lowest frost hardiness of all characteristic tree and shrub species (max. average annual low temperature) [°C]** | | | | | | | | | | | | | | | | | | | | | | | | | | | -36 | | |
| **Natural/near-natural combination of species** | | | | | | | | | | | | | | | | | | | | | | | | | | | | | |
| **Species** | | | | | | **Areal fraction [%]** | | | | | | **Species (english)** | | | | | | | **Structural element** | | | | | | | | | | |
| Pinus sylvestris | | | | | | 40 | | | | | | Scotch pine | | | | | | | Main tree species 1 | | | | | | | | | | |
| Eriophorum vaginatum | | | | | | 40 | | | | | | Tussock cotton-grass | | | | | | | Dominant herb species | | | | | | | | | | |
| Ledum palustre | | | | | | 30 | | | | | | Crystal tea | | | | | | | Upper tree/shrub layer | | | | | | | | | | |
| Vaccinium oxycoccos | | | | | | 60 | | | | | | Cranberry | | | | | | | Dominant herb species | | | | | | | | | | |
| Andromeda polifolia | | | | | | 2 | | | | | | Bog rosemary | | | | | | | Upper tree/shrub layer | | | | | | | | | | |
| Sphagnum recurvum | | | | | | 40 | | | | | | Curved peat moss | | | | | | | Dominant moss species | | | | | | | | | | |

# **Euphorbio angulatae-Quercetum pubescentis KNAPP ex HÜBL 1959**

| **Synonym** | | | | **1.Sources of the community relevées** | | | | | | | | | | | | | | | | | | | | | | | | | **No. of relevées** | | | |
| --- | --- | --- | --- | --- | --- | --- | --- | --- | --- | --- | --- | --- | --- | --- | --- | --- | --- | --- | --- | --- | --- | --- | --- | --- | --- | --- | --- | --- | --- | --- | --- | --- |
| **2. EUNIS-Code, mapped EUNIS class** | | | | | | | | | | | | | | | | | | | | | | | | |
| Edge spurge - Downy oak forest | | | | 1. Willner et Grabherr (2007) Vol 1 p. 104 et Table 14/12 (also Soó 1964b p. 269; Mucina et al. (1993) Teil III, S.204; Chytry et al. 2013 tab. 7/3 p. 338+310; Hegedusova et al. 2021 tab.1/4 p. 108) | | | | | | | | | | | | | | | | | | | | | | | | | 311 | | | |
| 2. T1932, T193 - Eastern Quercus pubescens forests | | | | | | | | | | | | | | | | | | | | | | | | |
| **Possible climate classes** | | | | | | | | | | | | | | | | | | | | | | | | | | | | | | | | |
| 06 | 07 | 14 | 15 | | 16 | | 17 | | 23 | | 24 | 25 | | 26 | | 27 | 31 | | 32 | 33 | | | 34 | | 35 | | 36 | 37 | | | 41 | 42 |
| 43 | 44 | 45 | 46 | | 47 | | 51 | | 52 | | 53 | 54 | | 55 | | 56 | 57 | | 60 | 61 | | | 62 | | 63 | | 64 | 65 | | | 66 | 67 |
| **Typical site forms according to Benning et al. (2015)** | | | | | | | | | | | | | | | | | | | | | | | | | | | | | | | | |
| **Water budget levels** | | | | | | | | | | **Trophy levels** | | | | | | | | | | | **Relief/ Exposition** | | | | | | | | | | | |
| T1, T2, T3, T4, T5 | | | | | | | | | | mo, e | | | | | | | | | | | Plane, Shady slope, Sunny slope | | | | | | | | | | | |
| **Typical community parameter ranges** | | | | | | | | | | | | | | | | | | | | | | | | | | | | | | | | |
| **Lower limit (fuzzy)** | | | | | | | | **Lower limit of optimum** | | | | | | | | | | **Upper limit of optimum** | | | | | | | | **Upper limit (fuzzy)** | | | | | | |
| **Base saturation (according to Kappen-Adrian) [%]** | | | | | | | | | | | | | | | | | | | | | | | | | | | | | | | | |
| 28 | | | | | | | | 40 | | | | | | | | | | 88 | | | | | | | | 100 | | | | | | |
| **pHH2O [-]** | | | | | | | | | | | | | | | | | | | | | | | | | | | | | | | | |
| 5 | | | | | | | | 5.3 | | | | | | | | | | 6.7 | | | | | | | | >7 | | | | | | |
| **C/N ratio in humus and 10 cm mineral soil layer [%C/%N]** | | | | | | | | | | | | | | | | | | | | | | | | | | | | | | | | |
| 15 | | | | | | | | 16 | | | | | | | | | | 21 | | | | | | | | 22 | | | | | | |
| **Volumetric water content in the rooted soil layer [%]** | | | | | | | | | | | | | | | | | | | | | | | | | | | | | | | | |
| 8 | | | | | | | | 11 | | | | | | | | | | 24 | | | | | | | | 27 | | | | | | |
| **Growing season length [d>10°TMT/a]** | | | | | | | | | | | | | | | | | | | | | | | | | | | | | | | | |
| 155 | | | | | | | | 173 | | | | | | | | | | 243 | | | | | | | | 260 | | | | | | |
| **Climatic water balance per vegetation month [mm/Veg.-Mon.]** | | | | | | | | | | | | | | | | | | | | | | | | | | | | | | | | |
| -46 | | | | | | | | -29 | | | | | | | | | | 55 | | | | | | | | 59 | | | | | | |
| **Solar radiation (PAR) in the growing season [kWh m-2 a-1]** | | | | | | | | | | | | | | | **Lower limit (fuzzy)** | | | | | | | | | **Upper limit (fuzzy)** | | | | | | | | |
| 546 | | | | | | | | | 844 | | | | | | | | |
| **Lowest frost hardiness of all characteristic tree and shrub species (max. average annual low temperature) [°C]** | | | | | | | | | | | | | | | | | | | | | | | | | | | | | | -16 | | |
| **Natural/near-natural combination of species** | | | | | | | | | | | | | | | | | | | | | | | | | | | | | | | | |
| **Species** | | | | | | **Areal fraction [%]** | | | | | | | **Species (english)** | | | | | | | | | **Structural element** | | | | | | | | | | |
| Quercus pubescens | | | | | | 50 | | | | | | | Downy oak | | | | | | | | | Main tree species 1 | | | | | | | | | | |
| Cornus mas | | | | | | 15 | | | | | | | Cornel cherry | | | | | | | | | Intermediate tree layer | | | | | | | | | | |
| Acer campestre | | | | | | 5 | | | | | | | Hedge maple | | | | | | | | | Main tree species 2 | | | | | | | | | | |
| Quercus cerris | | | | | | 1 | | | | | | | Turkey oak | | | | | | | | | Secondary tree species | | | | | | | | | | |
| Lithospermum purpurocaeruleum | | | | | | 5 | | | | | | | Purple gromwell | | | | | | | | | Dominant herb species | | | | | | | | | | |
| Rosa canina | | | | | | 3 | | | | | | | Dog rose | | | | | | | | | Upper tree/shrub layer | | | | | | | | | | |
| Viburnum lantana | | | | | | 3 | | | | | | | Wayfaring tree | | | | | | | | | Upper tree/shrub layer | | | | | | | | | | |
| Cornus sanguinea | | | | | | 5 | | | | | | | Bloodtwig dogwood | | | | | | | | | Upper tree/shrub layer | | | | | | | | | | |
| Euonymus verrucosa | | | | | | 5 | | | | | | | Warty spindle bush | | | | | | | | | Upper tree/shrub layer | | | | | | | | | | |
| Crataegus monogyna | | | | | | 3 | | | | | | | Common hawthorn | | | | | | | | | Upper tree/shrub layer | | | | | | | | | | |
| Ligustrum vulgare | | | | | | 5 | | | | | | | European privet | | | | | | | | | Upper tree/shrub layer | | | | | | | | | | |

# **Fraxino excelsi-Aceretum pseudoplatani TÜXEN 1937**

| **Synonym** | | | | **1.Sources of the community relevées** | | | | | | | | | | | | | | | | | | | | | | **No. of relevées** | | | |
| --- | --- | --- | --- | --- | --- | --- | --- | --- | --- | --- | --- | --- | --- | --- | --- | --- | --- | --- | --- | --- | --- | --- | --- | --- | --- | --- | --- | --- | --- |
| **2. EUNIS-Code, mapped EUNIS class** | | | | | | | | | | | | | | | | | | | | | |
| Ash-Mountain maple forest | | | | Oberdorfer (1992) Vol IV, Table321/9A and Text Vol. p. 185 (also Tüxen (1937) p. 146, Hartmann et Jahn (1967) Table III/20-25; Ellenberg et Klötzli 1972 p. 672; Schmider et Burnand 1988 p. 108; Niemeyer et al. 2010 p. 64; Schubert 2001 p. 47) | | | | | | | | | | | | | | | | | | | | | | 337 | | | |
| T1F1 - Medio-European ravine forests | | | | | | | | | | | | | | | | | | | | | |
| **Possible climate classes** | | | | | | | | | | | | | | | | | | | | | | | | | | | | | |
| 06 | 07 | 14 | 15 | | 16 | | 17 | | 23 | 24 | 25 | | | 26 | 27 | 31 | 32 | | 33 | | 34 | | 35 | 36 | 37 | | | 41 | 42 |
| 43 | 44 | 45 | 46 | | 47 | | 51 | | 52 | 53 | 54 | | | 55 | 56 | 57 | 60 | | 61 | | 62 | | 63 | 64 | 65 | | | 66 | 67 |
| **Typical site forms according to Benning et al. (2015)** | | | | | | | | | | | | | | | | | | | | | | | | | | | | | |
| **Water budget levels** | | | | | | | | **Trophy levels** | | | | | | | | | | | | **Relief/ Exposition** | | | | | | | | | |
| S0, S1, S2 | | | | | | | | mo, e | | | | | | | | | | | | Shady slope | | | | | | | | | |
| **Typical community parameter ranges** | | | | | | | | | | | | | | | | | | | | | | | | | | | | | |
| **Lower limit (fuzzy)** | | | | | | | **Lower limit of optimum** | | | | | | | | **Upper limit of optimum** | | | | | | | | **Upper limit (fuzzy)** | | | | | | |
| **Base saturation (according to Kappen-Adrian) [%]** | | | | | | | | | | | | | | | | | | | | | | | | | | | | | |
| 23 | | | | | | | 24 | | | | | | | | 80 | | | | | | | | 100 | | | | | | |
| **pHH2O [-]** | | | | | | | | | | | | | | | | | | | | | | | | | | | | | |
| 4.5 | | | | | | | 4.8 | | | | | | | | 6.8 | | | | | | | | 7 | | | | | | |
| **C/N ratio in humus and 10 cm mineral soil layer [%C/%N]** | | | | | | | | | | | | | | | | | | | | | | | | | | | | | |
| 15 | | | | | | | 16 | | | | | | | | 25 | | | | | | | | 26 | | | | | | |
| **Volumetric water content in the rooted soil layer [%]** | | | | | | | | | | | | | | | | | | | | | | | | | | | | | |
| 12 | | | | | | | 15 | | | | | | | | 28 | | | | | | | | 28 | | | | | | |
| **Growing season length [d>10°TMT/a]** | | | | | | | | | | | | | | | | | | | | | | | | | | | | | |
| 110 | | | | | | | 113 | | | | | | | | 165 | | | | | | | | 175 | | | | | | |
| **Climatic water balance per vegetation month [mm/Veg.-Mon.]** | | | | | | | | | | | | | | | | | | | | | | | | | | | | | |
| -22 | | | | | | | -17 | | | | | | | | 103 | | | | | | | | 117 | | | | | | |
| **Solar radiation (PAR) in the growing season [kWh m-2 a-1]** | | | | | | | | | | | | | **Lower limit (fuzzy)** | | | | | | | | | **Upper limit (fuzzy)** | | | | | | | |
| 341 | | | | | | | | | 633 | | | | | | | |
| **Lowest frost hardiness of all characteristic tree and shrub species (max. average annual low temperature) [°C]** | | | | | | | | | | | | | | | | | | | | | | | | | | | -24 | | |
| **Natural/near-natural combination of species** | | | | | | | | | | | | | | | | | | | | | | | | | | | | | |
| **Species** | | | | | | **Areal fraction [%]** | | | | | | **Species (english)** | | | | | | **Structural element** | | | | | | | | | | | |
| Acer pseudoplatanus | | | | | | 50 | | | | | | Golden sycamore | | | | | | Main tree species 1 | | | | | | | | | | | |
| Fagus sylvatica | | | | | | 10 | | | | | | European beech | | | | | | Secondary tree species | | | | | | | | | | | |
| Fraxinus excelsior | | | | | | 15 | | | | | | Common ash | | | | | | Main tree species 2 | | | | | | | | | | | |
| Tilia platyphyllos | | | | | | 2 | | | | | | Large-leaved lime | | | | | | Secondary tree species | | | | | | | | | | | |
| Athyrium filix-femina | | | | | | 40 | | | | | | Common lady-fern | | | | | | Dominant herb species | | | | | | | | | | | |
| Mercurialis perennis | | | | | | 40 | | | | | | Dog mercury | | | | | | Dominant herb species | | | | | | | | | | | |

# **Fraxino excelsi-Populetum albae JURKO 1958**

| **Synonym** | | | | **1.Sources of the community relevées** | | | | | | | | | | | | | | | | | | | | | | **No. of relevées** | | | |
| --- | --- | --- | --- | --- | --- | --- | --- | --- | --- | --- | --- | --- | --- | --- | --- | --- | --- | --- | --- | --- | --- | --- | --- | --- | --- | --- | --- | --- | --- |
| **2. EUNIS-Code, mapped EUNIS class** | | | | | | | | | | | | | | | | | | | | | |
| Ash-Silver poplar forest | | | | 1. Willner et Grabherr (2007) Vol 1 p. 118 et Tab. 16/9 (also Mucina et al. (1993) Teil III, p. 105; Douda et al. 2015 Tab. A-11) | | | | | | | | | | | | | | | | | | | | | | 253 | | | |
| 2. T1311, T13-Temperate hardwood riparian forest | | | | | | | | | | | | | | | | | | | | | |
| **Possible climate classes** | | | | | | | | | | | | | | | | | | | | | | | | | | | | | |
| 06 | 07 | 14 | 15 | | 16 | | 17 | | 23 | 24 | 25 | | | 26 | 27 | 31 | 32 | | 33 | | 34 | | 35 | 36 | 37 | | | 41 | 42 |
| 43 | 44 | 45 | 46 | | 47 | | 51 | | 52 | 53 | 54 | | | 55 | 56 | 57 | 60 | | 61 | | 62 | | 63 | 64 | 65 | | | 66 | 67 |
| **Typical site forms according to Benning et al. (2015)** | | | | | | | | | | | | | | | | | | | | | | | | | | | | | |
| **Water budget levels** | | | | | | | | **Trophy levels** | | | | | | | | | | **Relief/ Exposition** | | | | | | | | | | | |
| G4, G5, G6, S5 | | | | | | | | mo, e | | | | | | | | | | Plane, Shady slope, Sunny slope | | | | | | | | | | | |
| **Typical community parameter ranges** | | | | | | | | | | | | | | | | | | | | | | | | | | | | | |
| **Lower limit (fuzzy)** | | | | | | | **Lower limit of optimum** | | | | | | | | **Upper limit of optimum** | | | | | | | | **Upper limit (fuzzy)** | | | | | | |
| **Base saturation (according to Kappen-Adrian) [%]** | | | | | | | | | | | | | | | | | | | | | | | | | | | | | |
| 27 | | | | | | | 39 | | | | | | | | 88 | | | | | | | | 100 | | | | | | |
| **pHH2O [-]** | | | | | | | | | | | | | | | | | | | | | | | | | | | | | |
| 4.9 | | | | | | | 5.3 | | | | | | | | 6.7 | | | | | | | | >7 | | | | | | |
| **C/N ratio in humus and 10 cm mineral soil layer [%C/%N]** | | | | | | | | | | | | | | | | | | | | | | | | | | | | | |
| 12 | | | | | | | 15 | | | | | | | | 25 | | | | | | | | 28 | | | | | | |
| **Volumetric water content in the rooted soil layer [%]** | | | | | | | | | | | | | | | | | | | | | | | | | | | | | |
| 12 | | | | | | | 32 | | | | | | | | 43 | | | | | | | | 45 | | | | | | |
| **Growing season length [d>10°TMT/a]** | | | | | | | | | | | | | | | | | | | | | | | | | | | | | |
| 140 | | | | | | | 153 | | | | | | | | 207 | | | | | | | | 220 | | | | | | |
| **Climatic water balance per vegetation month [mm/Veg.-Mon.]** | | | | | | | | | | | | | | | | | | | | | | | | | | | | | |
| -46 | | | | | | | -40 | | | | | | | | 50 | | | | | | | | 70 | | | | | | |
| **Solar radiation (PAR) in the growing season [kWh m-2 a-1]** | | | | | | | | | | | | | **Lower limit (fuzzy)** | | | | | | | | | **Upper limit (fuzzy)** | | | | | | | |
| 378 | | | | | | | | | 904 | | | | | | | |
| **Lowest frost hardiness of all characteristic tree and shrub species (max. average annual low temperature) [°C]** | | | | | | | | | | | | | | | | | | | | | | | | | | | -23 | | |
| **Natural/near-natural combination of species** | | | | | | | | | | | | | | | | | | | | | | | | | | | | | |
| Species | | | | | | Areal fraction [%] | | | | | | Species (english) | | | | | | | | Structural element | | | | | | | | | |
| Fraxinus excelsior | | | | | | 2 | | | | | | Common ash | | | | | | | | Secondary tree species | | | | | | | | | |
| Alnus glutinosa | | | | | | 30 | | | | | | Common alder | | | | | | | | Main tree species 1 | | | | | | | | | |
| Populus alba | | | | | | 30 | | | | | | White poplar | | | | | | | | Main tree species 2 | | | | | | | | | |
| Aegopodium podagraria | | | | | | 15 | | | | | | Bishop’s goutweed | | | | | | | | Dominant herb species | | | | | | | | | |
| Ranunculus ficaria | | | | | | 15 | | | | | | Lesser celandine | | | | | | | | Dominant herb species | | | | | | | | | |
| Impatiens noli-tangere | | | | | | 15 | | | | | | Touch-me-not balsam | | | | | | | | Dominant herb species | | | | | | | | | |
| Rubus caesius | | | | | | 15 | | | | | | European dewberry | | | | | | | | Upper tree/shrub layer | | | | | | | | | |
| Cornus sanguinea | | | | | | 25 | | | | | | Bloodtwig dogwood | | | | | | | | Upper tree/shrub layer | | | | | | | | | |

# **Fraxino oxycarpae-Quercetum cerridis SCOLOPPA et FILESI 1998**

| **Synonym** | | | **1.Sources of the community relevées** | | | | | | | | | | | | | | | | | | | | | | **No. of relevées** | | | |
| --- | --- | --- | --- | --- | --- | --- | --- | --- | --- | --- | --- | --- | --- | --- | --- | --- | --- | --- | --- | --- | --- | --- | --- | --- | --- | --- | --- | --- |
| **2. EUNIS-Code, mapped EUNIS class** | | | | | | | | | | | | | | | | | | | | | |
| Whorled ash- Turkey oak wood | | | 1. Blasi et al. 2020 Tab. 5/5 (also: Scoppola & Filesi 1998 Tab.3) | | | | | | | | | | | | | | | | | | | | | | 23 | | | |
| 2. T1941 - Northern Italian Quercus cerris forests | | | | | | | | | | | | | | | | | | | | | |
| **Possible climate classes** | | | | | | | | | | | | | | | | | | | | | | | | | | | | |
| 06 | 07 | 14 | 15 | 16 | | 17 | 23 | | 24 | 25 | | | 26 | 27 | 31 | 32 | 33 | | | 34 | | 35 | 36 | 37 | | | 41 | 42 |
| 43 | 44 | 45 | 46 | 47 | | 51 | 52 | | 53 | 54 | | | 55 | 56 | 57 | 60 | 61 | | | 62 | | 63 | 64 | 65 | | | 66 | 67 |
| **Typical site forms according to Benning et al. (2015)** | | | | | | | | | | | | | | | | | | | | | | | | | | | | |
| **Water budget levels** | | | | | | | | **Trophy levels** | | | | | | | | | | | **Relief/ Exposition** | | | | | | | | | |
| S3 | | | | | | | | mo, e | | | | | | | | | | | Plane | | | | | | | | | |
| **Typical community parameter ranges** | | | | | | | | | | | | | | | | | | | | | | | | | | | | |
| **Lower limit (fuzzy)** | | | | | | **Lower limit of optimum** | | | | | | | | **Upper limit of optimum** | | | | | | | | **Upper limit (fuzzy)** | | | | | | |
| **Base saturation (according to Kappen-Adrian) [%]** | | | | | | | | | | | | | | | | | | | | | | | | | | | | |
| 28 | | | | | | 40 | | | | | | | | 88 | | | | | | | | 100 | | | | | | |
| **pHH2O [-]** | | | | | | | | | | | | | | | | | | | | | | | | | | | | |
| 5 | | | | | | 5.3 | | | | | | | | 6.7 | | | | | | | | >7 | | | | | | |
| **C/N ratio in humus and 10 cm mineral soil layer [%C/%N]** | | | | | | | | | | | | | | | | | | | | | | | | | | | | |
| 15 | | | | | | 16 | | | | | | | | 21 | | | | | | | | 22 | | | | | | |
| **Volumetric water content in the rooted soil layer [%]** | | | | | | | | | | | | | | | | | | | | | | | | | | | | |
| 8 | | | | | | 14 | | | | | | | | 17 | | | | | | | | 18 | | | | | | |
| **Growing season length [d>10°TMT/a]** | | | | | | | | | | | | | | | | | | | | | | | | | | | | |
| 220 | | | | | | 227 | | | | | | | | 253 | | | | | | | | 260 | | | | | | |
| **Climatic water balance per vegetation month [mm/Veg.-Mon.]** | | | | | | | | | | | | | | | | | | | | | | | | | | | | |
| -46 | | | | | | -46 | | | | | | | | 65 | | | | | | | | 70 | | | | | | |
| **Solar radiation (PAR) in the growing season [kWh m-2 a-1]** | | | | | | | | | | | | **Lower limit (fuzzy)** | | | | | | | | | **Upper limit (fuzzy)** | | | | | | | |
| 814 | | | | | | | | | 963 | | | | | | | |
| **Lowest frost hardiness of all characteristic tree and shrub species (max. average annual low temperature) [°C]** | | | | | | | | | | | | | | | | | | | | | | | | | | -16 | | |
| **Natural/near-natural combination of species** | | | | | | | | | | | | | | | | | | | | | | | | | | | | |
| **Species** | | | | | **Areal fraction [%]** | | | | | | **Species (english)** | | | | | | | **Structural element** | | | | | | | | | | |
| Fraxinus oxycarpa | | | | | 5 | | | | | | Whorled ash | | | | | | | Mixed tree species | | | | | | | | | | |
| Fraxinus ornus | | | | | 10 | | | | | | Manna ash | | | | | | | Main tree species 2 | | | | | | | | | | |
| Cornus mas | | | | | 2 | | | | | | Cornel cherry | | | | | | | Intermediate tree layer | | | | | | | | | | |
| Acer campestre | | | | | 5 | | | | | | Hedge maple | | | | | | | Secondary tree species | | | | | | | | | | |
| Quercus cerris | | | | | 60 | | | | | | Turkey oak | | | | | | | Main tree species 1 | | | | | | | | | | |
| Quercus ilex | | | | | 1 | | | | | | Holm oak | | | | | | | Secondary tree species | | | | | | | | | | |
| Brachypodium sylvaticum | | | | | 1 | | | | | | False brome | | | | | | | Character herb species | | | | | | | | | | |
| Hedera helix | | | | | 5 | | | | | | English ivy | | | | | | | Upper tree/shrub layer | | | | | | | | | | |
| Ruscus aculeatus | | | | | 3 | | | | | | Butcher’s broom | | | | | | | Upper tree/shrub layer | | | | | | | | | | |
| Crataegus monogyna | | | | | 2 | | | | | | Common hawthorn | | | | | | | Intermediate tree layer | | | | | | | | | | |
| Ligustrum vulgare | | | | | 3 | | | | | | European privet | | | | | | | Upper tree/shrub layer | | | | | | | | | | |

# **Galio-Carpinetum betuli potentilletosum albaea KLIKA 1939**

| **Synonym** | | | | | | | **1.Sources of the community relevées** | | | | | | | | | | | | | | | | | | | **No. of relevées** | | | |
| --- | --- | --- | --- | --- | --- | --- | --- | --- | --- | --- | --- | --- | --- | --- | --- | --- | --- | --- | --- | --- | --- | --- | --- | --- | --- | --- | --- | --- | --- |
| **2. EUNIS-Code, mapped EUNIS class** | | | | | | | | | | | | | | | | | | |
| Scotch mist-Hornbeam-oak forest (white cinquefoil subass.) | | | | | | | 1. Hartmann et Jahn (1967) Tab. IXc/25-28, p. 518 (also Schmidt (2002) 3.2.1, Tab. 2/3/1.1) | | | | | | | | | | | | | | | | | | | 55 | | | |
| 2. T1E16 - Sub-continental Quercus - Carpinus betulus forests | | | | | | | | | | | | | | | | | | |
| **Possible climate classes** | | | | | | | | | | | | | | | | | | | | | | | | | | | | | |
| 06 | 07 | 14 | 15 | 16 | | 17 | | 23 | | 24 | 25 | | | 26 | 27 | 31 | 32 | 33 | | | 34 | | 35 | 36 | 37 | | | 41 | 42 |
| 43 | 44 | 45 | 46 | 47 | | 51 | | 52 | | 53 | 54 | | | 55 | 56 | 57 | 60 | 61 | | | 62 | | 63 | 64 | 65 | | | 66 | 67 |
| **Typical site forms according to Benning et al. (2015)** | | | | | | | | | | | | | | | | | | | | | | | | | | | | | |
| **Water budget levels** | | | | | | | | | **Trophy levels** | | | | | | | | | | **Relief/ Exposition** | | | | | | | | | | |
| T2, T3, T4 | | | | | | | | | mo | | | | | | | | | | Sunny slope | | | | | | | | | | |
| **Typical community parameter ranges** | | | | | | | | | | | | | | | | | | | | | | | | | | | | | |
| **Lower limit (fuzzy)** | | | | | | **Lower limit of optimum** | | | | | | | | | **Upper limit of optimum** | | | | | | | | **Upper limit (fuzzy)** | | | | | | |
| **Base saturation (according to Kappen-Adrian) [%]** | | | | | | | | | | | | | | | | | | | | | | | | | | | | | |
| 23 | | | | | | 26 | | | | | | | | | 40 | | | | | | | | 43 | | | | | | |
| **pHH2O [-]** | | | | | | | | | | | | | | | | | | | | | | | | | | | | | |
| 4.5 | | | | | | 4.7 | | | | | | | | | 5.3 | | | | | | | | 5.4 | | | | | | |
| **C/N ratio in humus and 10 cm mineral soil layer [%C/%N]** | | | | | | | | | | | | | | | | | | | | | | | | | | | | | |
| 15 | | | | | | 17 | | | | | | | | | 24 | | | | | | | | 26 | | | | | | |
| **Volumetric water content in the rooted soil layer [%]** | | | | | | | | | | | | | | | | | | | | | | | | | | | | | |
| 8 | | | | | | 10 | | | | | | | | | 17 | | | | | | | | 19 | | | | | | |
| **Growing season length [d>10°TMT/a]** | | | | | | | | | | | | | | | | | | | | | | | | | | | | | |
| 140 | | | | | | 153 | | | | | | | | | 207 | | | | | | | | 220 | | | | | | |
| **Climatic water balance per vegetation month [mm/Veg.-Mon.]** | | | | | | | | | | | | | | | | | | | | | | | | | | | | | |
| -32 | | | | | | -32 | | | | | | | | | -5 | | | | | | | | 1 | | | | | | |
| **Solar radiation (PAR) in the growing season [kWh m-2 a-1]** | | | | | | | | | | | | | **Lower limit (fuzzy)** | | | | | | | | | **Upper limit (fuzzy)** | | | | | | | |
| 384 | | | | | | | | | 689 | | | | | | | |
| **Lowest frost hardiness of all characteristic tree and shrub species (max. average annual low temperature) [°C]** | | | | | | | | | | | | | | | | | | | | | | | | | | | -20 | | |
| **Natural/near-natural combination of species** | | | | | | | | | | | | | | | | | | | | | | | | | | | | | |
| **Species** | | | | | **Areal fraction [%]** | | | | | | | **Species (english)** | | | | | | | | **Structural element** | | | | | | | | | |
| Fagus sylvatica | | | | | 5 | | | | | | | European beech | | | | | | | | Mixed tree species | | | | | | | | | |
| Quercus petraea | | | | | 20 | | | | | | | Sessile oak | | | | | | | | Main tree species 2 | | | | | | | | | |
| Carpinus betulus | | | | | 50 | | | | | | | European hornbeam | | | | | | | | Main tree species 1 | | | | | | | | | |
| Festuca heterophylla | | | | | 10 | | | | | | | Bristly fescue | | | | | | | | Dominant herb species | | | | | | | | | |
| Stellaria holostea | | | | | 10 | | | | | | | Easter bell | | | | | | | | Dominant herb species | | | | | | | | | |
| Galium sylvaticum | | | | | 10 | | | | | | | Scotch mist | | | | | | | | Dominant herb species | | | | | | | | | |

# **Galio-Carpinetum betuli typicum OBERDORFER 1957**

| **Synonym** | | | | **1.Sources of the community relevées** | | | | | | | | | | | | | | | | | | | | | | **No. of relevées** | | | |
| --- | --- | --- | --- | --- | --- | --- | --- | --- | --- | --- | --- | --- | --- | --- | --- | --- | --- | --- | --- | --- | --- | --- | --- | --- | --- | --- | --- | --- | --- |
| **2. EUNIS-Code, mapped EUNIS class** | | | | | | | | | | | | | | | | | | | | | |
| Scotch mist-Hornbeam-oak forest (typ. subass.) | | | | 1. Hartmann et Jahn (1967) Table IXa/20, Table 21/56-69, p. 507 (also Th. Müller (1990) Table 5; Oberdorfer (1992)Vol IV Table 313/1-8, and Text Vol IV p. 166; Chytry et al. 2013 tab. 6/1 p. 237+223; Niemeyer et al. 2010 p. 44; Matuszkiewicz W.+ A. 1985 Tab. 1/2-3 p. 476; Schubert 2001 p. 66) | | | | | | | | | | | | | | | | | | | | | | 4209 | | | |
| 2. T1E16 - Sub-continental Quercus - Carpinus betulus forests | | | | | | | | | | | | | | | | | | | | | |
| **Possible climate classes** | | | | | | | | | | | | | | | | | | | | | | | | | | | | | |
| 06 | 07 | 14 | 15 | | 16 | | 17 | 23 | | 24 | | 25 | | 26 | 27 | 31 | 32 | 33 | | | 34 | | 35 | 36 | 37 | | | 41 | 42 |
| 43 | 44 | 45 | 46 | | 47 | | 51 | 52 | | 53 | | 54 | | 55 | 56 | 57 | 60 | 61 | | | 62 | | 63 | 64 | 65 | | | 66 | 67 |
| **Typical site forms according to Benning et al. (2015)** | | | | | | | | | | | | | | | | | | | | | | | | | | | | | |
| **Water budget levels** | | | | | | | | | **Trophy levels** | | | | | | | | | | **Relief/ Exposition** | | | | | | | | | | |
| T2, T3, T4, S0, S1, S2 | | | | | | | | | mo | | | | | | | | | | Plane, Shady slope | | | | | | | | | | |
| **Typical community parameter ranges** | | | | | | | | | | | | | | | | | | | | | | | | | | | | | |
| **Lower limit (fuzzy)** | | | | | | | **Lower limit of optimum** | | | | | | | | **Upper limit of optimum** | | | | | | | | **Upper limit (fuzzy)** | | | | | | |
| **Base saturation (according to Kappen-Adrian) [%]** | | | | | | | | | | | | | | | | | | | | | | | | | | | | | |
| 21 | | | | | | | 32 | | | | | | | | 74 | | | | | | | | 85 | | | | | | |
| **pHH2O [-]** | | | | | | | | | | | | | | | | | | | | | | | | | | | | | |
| 4.4 | | | | | | | 4.6 | | | | | | | | 5.2 | | | | | | | | 5.4 | | | | | | |
| **C/N ratio in humus and 10 cm mineral soil layer [%C/%N]** | | | | | | | | | | | | | | | | | | | | | | | | | | | | | |
| 15 | | | | | | | 17 | | | | | | | | 24 | | | | | | | | 26 | | | | | | |
| **Volumetric water content in the rooted soil layer [%]** | | | | | | | | | | | | | | | | | | | | | | | | | | | | | |
| 8 | | | | | | | 11 | | | | | | | | 25 | | | | | | | | 28 | | | | | | |
| **Growing season length [d>10°TMT/a]** | | | | | | | | | | | | | | | | | | | | | | | | | | | | | |
| 115 | | | | | | | 133 | | | | | | | | 203 | | | | | | | | 220 | | | | | | |
| **Climatic water balance per vegetation month [mm/Veg.-Mon.]** | | | | | | | | | | | | | | | | | | | | | | | | | | | | | |
| -46 | | | | | | | -32 | | | | | | | | 65 | | | | | | | | 70 | | | | | | |
| **Solar radiation (PAR) in the growing season [kWh m-2 a-1]** | | | | | | | | | | | | | **Lower limit (fuzzy)** | | | | | | | | | **Upper limit (fuzzy)** | | | | | | | |
| 388 | | | | | | | | | 716 | | | | | | | |
| **Lowest frost hardiness of all characteristic tree and shrub species (max. average annual low temperature) [°C]** | | | | | | | | | | | | | | | | | | | | | | | | | | | -20 | | |
| **Natural/near-natural combination of species** | | | | | | | | | | | | | | | | | | | | | | | | | | | | | |
| **Species** | | | | | | **Areal fraction [%]** | | | | | **Species (english)** | | | | | | | | | **Structural element** | | | | | | | | | |
| Quercus petraea | | | | | | 5 | | | | | Sessile oak | | | | | | | | | Secondary tree species | | | | | | | | | |
| Fagus sylvatica | | | | | | 10 | | | | | European beech | | | | | | | | | Secondary tree species | | | | | | | | | |
| Carpinus betulus | | | | | | 50 | | | | | European hornbeam | | | | | | | | | Main tree species 1 | | | | | | | | | |
| Quercus robur | | | | | | 10 | | | | | Pedunculate oak | | | | | | | | | Main tree species 2 | | | | | | | | | |
| Acer campestre | | | | | | 40 | | | | | Hedge maple | | | | | | | | | Mixed tree species | | | | | | | | | |
| Galium odoratum | | | | | | 15 | | | | | Sweet woodruff | | | | | | | | | Dominant herb species | | | | | | | | | |
| Primula elatior | | | | | | 10 | | | | | Oxlip | | | | | | | | | Dominant herb species | | | | | | | | | |
| Galium sylvaticum | | | | | | 40 | | | | | Scotch mist | | | | | | | | | Dominant herb species | | | | | | | | | |
| Crataegus laevigata | | | | | | 25 | | | | | Midland hawthorn | | | | | | | | | Intermediate tree layer | | | | | | | | | |
| Corylus avellana | | | | | | 25 | | | | | Hazel | | | | | | | | | Intermediate tree layer | | | | | | | | | |

# **Geranio asphodeloidis–Quercetum frainetto BERGMEIER 2008**

| **Synonym** | | | | | | **1.Sources of the community relevées** | | | | | | | | | | | | | | | | | | | | **No. of relevées** | | | |
| --- | --- | --- | --- | --- | --- | --- | --- | --- | --- | --- | --- | --- | --- | --- | --- | --- | --- | --- | --- | --- | --- | --- | --- | --- | --- | --- | --- | --- | --- |
| **2. EUNIS-Code, mapped EUNIS class** | | | | | | | | | | | | | | | | | | | |
| Tuberous cranesbill- Hungarian oak forest | | | | | | 1. Bergmeier et Dimopoulos 2008 Tab. 1/12 | | | | | | | | | | | | | | | | | | | | 14 | | | |
| 2. T19522 - Southern Hellenic Quercus frainetto forests | | | | | | | | | | | | | | | | | | | |
| **Possible climate classes** | | | | | | | | | | | | | | | | | | | | | | | | | | | | | |
| 06 | 07 | 14 | 15 | 16 | | | 17 | 23 | | 24 | 25 | | | 26 | 27 | 31 | 32 | 33 | | | 34 | | 35 | 36 | 37 | | | 41 | 42 |
| 43 | 44 | 45 | 46 | 47 | | | 51 | 52 | | 53 | 54 | | | 55 | 56 | 57 | 60 | 61 | | | 62 | | 63 | 64 | 65 | | | 66 | 67 |
| **Typical site forms according to Benning et al. (2015)** | | | | | | | | | | | | | | | | | | | | | | | | | | | | | |
| **Water budget levels** | | | | | | | | | **Trophy levels** | | | | | | | | | | **Relief/ Exposition** | | | | | | | | | | |
| T1, T2, T3, T4, S2 | | | | | | | | | om, m | | | | | | | | | | Plane, Shady slope, Sunny slope | | | | | | | | | | |
| **Typical community parameter ranges** | | | | | | | | | | | | | | | | | | | | | | | | | | | | | |
| **Lower limit (fuzzy)** | | | | | | | **Lower limit of optimum** | | | | | | | | **Upper limit of optimum** | | | | | | | | **Upper limit (fuzzy)** | | | | | | |
| **Base saturation (according to Kappen-Adrian) [%]** | | | | | | | | | | | | | | | | | | | | | | | | | | | | | |
| 19 | | | | | | | 35 | | | | | | | | 100 | | | | | | | | 100 | | | | | | |
| **pHH2O [-]** | | | | | | | | | | | | | | | | | | | | | | | | | | | | | |
| 4.2 | | | | | | | 5.0 | | | | | | | | 7.2 | | | | | | | | 8 | | | | | | |
| **C/N ratio in humus and 10 cm mineral soil layer [%C/%N]** | | | | | | | | | | | | | | | | | | | | | | | | | | | | | |
| 15 | | | | | | | 17 | | | | | | | | 24 | | | | | | | | 26 | | | | | | |
| **Volumetric water content in the rooted soil layer [%]** | | | | | | | | | | | | | | | | | | | | | | | | | | | | | |
| 6 | | | | | | | 8 | | | | | | | | 17 | | | | | | | | 18 | | | | | | |
| **Growing season length [d>10°TMT/a]** | | | | | | | | | | | | | | | | | | | | | | | | | | | | | |
| 210 | | | | | | | 218 | | | | | | | | 252 | | | | | | | | 260 | | | | | | |
| **Climatic water balance per vegetation month [mm/Veg.-Mon.]** | | | | | | | | | | | | | | | | | | | | | | | | | | | | | |
| -46 | | | | | | | -46 | | | | | | | | 13 | | | | | | | | 25 | | | | | | |
| **Solar radiation (PAR) in the growing season [kWh m-2 a-1]** | | | | | | | | | | | | | **Lower limit (fuzzy)** | | | | | | | | | **Upper limit (fuzzy)** | | | | | | | |
| 1147 | | | | | | | | | 1291 | | | | | | | |
| **Lowest frost hardiness of all characteristic tree and shrub species (max. average annual low temperature) [°C]** | | | | | | | | | | | | | | | | | | | | | | | | | | | -20 | | |
| **Natural/near-natural combination of species** | | | | | | | | | | | | | | | | | | | | | | | | | | | | | |
| **Species** | | | | | **Areal fraction [%]** | | | | | | | **Species (english)** | | | | | | | | **Structural element** | | | | | | | | | |
| Quercus frainetto | | | | | 55 | | | | | | | Hungarian oak | | | | | | | | Main tree species 1 | | | | | | | | | |
| Castanea sativa | | | | | 1 | | | | | | | Chestnut | | | | | | | | Secondary tree species | | | | | | | | | |
| Luzula forsteri | | | | | 10 | | | | | | | Southern woodrush | | | | | | | | Dominant herb species | | | | | | | | | |
| Pteridium aquilinum | | | | | 10 | | | | | | | Bracken | | | | | | | | Dominant herb species | | | | | | | | | |
| Platanthera chlorantha | | | | | 2 | | | | | | | Greater butterfly-orchid | | | | | | | | Dominant herb species | | | | | | | | | |
| Juniperus communis | | | | | 5 | | | | | | | Common juniper | | | | | | | | Upper tree/shrub layer | | | | | | | | | |
| Juniperus oxycedrus | | | | | 5 | | | | | | | Prickly juniper | | | | | | | | Upper tree/shrub layer | | | | | | | | | |
| Erica arborea | | | | | 2 | | | | | | | Tree heath | | | | | | | | Upper tree/shrub layer | | | | | | | | | |

# **Holco mollis-Quercetum (robori-petraeae) LEMÉE 1937 corr. et em. OBERDORFER 1992**

| **Synonym** | | | | | | | | | | **1.Sources of the community relevées** | | | | | | | | | | | | | | | | | | **No. of relevées** | | |
| --- | --- | --- | --- | --- | --- | --- | --- | --- | --- | --- | --- | --- | --- | --- | --- | --- | --- | --- | --- | --- | --- | --- | --- | --- | --- | --- | --- | --- | --- | --- |
| **2. EUNIS-Code, mapped EUNIS class** | | | | | | | | | | | | | | | | | |
| Honey grass-Beech-Sessile oak forest  Fago-Quercetum petraeae Tx. 1955; Betulo-Quercetum petraeae violetosum rivinianaea TÜXEN 1937; Violo-Quercetum Oberd. 1957 | | | | | | | | | | 1. Oberdorfer (1992) Vol IV, Table 287/1 and Text Vol. p. 109 (also Hartmann et Jahn (1967) Table VIc/21, Table 16/63-67; Chytry et al. 2013 tab. 7/12 p.338+362; Matuszkiewicz J.M. 1993 p.46; Hofmann et Pommer 2013 p. 246; Schubert 2001 p. 70) | | | | | | | | | | | | | | | | | | 243 | | |
| 2. T1B1, T1B - Acidophilous Quercus forest | | | | | | | | | | | | | | | | | |
| **Possible climate classes** | | | | | | | | | | | | | | | | | | | | | | | | | | | | | | |
| 06 | 07 | 14 | 15 | 16 | | 17 | 23 | 24 | 25 | | | | 26 | 27 | | 31 | 32 | 33 | | | 34 | | 35 | | 36 | 37 | | | 41 | 42 |
| 43 | 44 | 45 | 46 | 47 | | 51 | 52 | 53 | 54 | | | | 55 | 56 | | 57 | 60 | 61 | | | 62 | | 63 | | 64 | 65 | | | 66 | 67 |
| **Typical site forms according to Benning et al. (2015)** | | | | | | | | | | | | | | | | | | | | | | | | | | | | | | |
| **Water budget levels** | | | | | | | | **Trophy levels** | | | | | | | | | | | | **Relief/ Exposition** | | | | | | | | | | |
| S1, S2 | | | | | | | | o | | | | | | | | | | | | Plane, Shady slope | | | | | | | | | | |
| **Typical community parameter ranges** | | | | | | | | | | | | | | | | | | | | | | | | | | | | | | |
| **Lower limit (fuzzy)** | | | | | | **Lower limit of optimum** | | | | | | | | | **Upper limit of optimum** | | | | | | | | | **Upper limit (fuzzy)** | | | | | | |
| **Base saturation (according to Kappen-Adrian) [%]** | | | | | | | | | | | | | | | | | | | | | | | | | | | | | | |
| 6 | | | | | | 10 | | | | | | | | | 28 | | | | | | | | | 32 | | | | | | |
| **pHH2O [-]** | | | | | | | | | | | | | | | | | | | | | | | | | | | | | | |
| 3.3 | | | | | | 3.7 | | | | | | | | | 5.1 | | | | | | | | | 5.4 | | | | | | |
| **C/N ratio in humus and 10 cm mineral soil layer [%C/%N]** | | | | | | | | | | | | | | | | | | | | | | | | | | | | | | |
| 15 | | | | | | 18 | | | | | | | | | 29 | | | | | | | | | 32 | | | | | | |
| **Volumetric water content in the rooted soil layer [%]** | | | | | | | | | | | | | | | | | | | | | | | | | | | | | | |
| 7 | | | | | | 10 | | | | | | | | | 24 | | | | | | | | | 27 | | | | | | |
| **Growing season length [d>10°TMT/a]** | | | | | | | | | | | | | | | | | | | | | | | | | | | | | | |
| 120 | | | | | | 137 | | | | | | | | | 203 | | | | | | | | | 220 | | | | | | |
| **Climatic water balance per vegetation month [mm/Veg.-Mon.]** | | | | | | | | | | | | | | | | | | | | | | | | | | | | | | |
| -22 | | | | | | -12 | | | | | | | | | 60 | | | | | | | | | 70 | | | | | | |
| **Solar radiation (PAR) in the growing season [kWh m-2 a-1]** | | | | | | | | | | | | **Lower limit (fuzzy)** | | | | | | | | | | **Upper limit (fuzzy)** | | | | | | | | |
| 392 | | | | | | | | | | 727 | | | | | | | | |
| **Lowest frost hardiness of all characteristic tree and shrub species (max. average annual low temperature) [°C]** | | | | | | | | | | | | | | | | | | | | | | | | | | | -24 | | | |
| **Natural/near-natural combination of species** | | | | | | | | | | | | | | | | | | | | | | | | | | | | | | |
| **Species** | | | | | **Areal fraction [%]** | | | | | | **Species (english)** | | | | | | | | **Structural element** | | | | | | | | | | | |
| Pinus sylvestris | | | | | 10 | | | | | | Scotch pine | | | | | | | | Secondary tree species | | | | | | | | | | | |
| Fagus sylvatica | | | | | 20 | | | | | | European beech | | | | | | | | Main tree species 2 | | | | | | | | | | | |
| Quercus petraea | | | | | 30 | | | | | | Sessile oak | | | | | | | | Main tree species 1 | | | | | | | | | | | |
| Quercus robur | | | | | 30 | | | | | | Pedunculate oak | | | | | | | | Mixed tree species | | | | | | | | | | | |
| Holcus mollis | | | | | 50 | | | | | | Creeping softgrass | | | | | | | | Dominant herb species | | | | | | | | | | | |
| Molinia arundinacea | | | | | 10 | | | | | | Purple moor grass | | | | | | | | Dominant herb species | | | | | | | | | | | |
| Avenella flexuosa | | | | | 20 | | | | | | Wavy hairgrass | | | | | | | | Dominant herb species | | | | | | | | | | | |

# **Huetio cynapioidis–Quercetum frainetto RAUS 1980**

| **Synonym** | | | | | | | | **1.Sources of the community relevées** | | | | | | | | | | | | | | | | | | **No. of relevées** | | | |
| --- | --- | --- | --- | --- | --- | --- | --- | --- | --- | --- | --- | --- | --- | --- | --- | --- | --- | --- | --- | --- | --- | --- | --- | --- | --- | --- | --- | --- | --- |
| **2. EUNIS-Code, mapped EUNIS class** | | | | | | | | | | | | | | | | | |
| Dog parsley bulbous umbel- Hungarian oak wood | | | | | | | | 1. Bergmeier et Dimopoulos 2008 Tab. 1/10 (also: Bergmeier 1990 Tab. 11/3-12 ; Fotiadi 2004 Tab. 40/13) | | | | | | | | | | | | | | | | | | 76 | | | |
| 2. T19522 - Southern Hellenic Quercus frainetto forests | | | | | | | | | | | | | | | | | |
| **Possible climate classes** | | | | | | | | | | | | | | | | | | | | | | | | | | | | | |
| 06 | 07 | 14 | 15 | 16 | 17 | | 23 | | | 24 | 25 | | | 26 | 27 | 31 | 32 | | 33 | | 34 | | 35 | 36 | 37 | | | 41 | 42 |
| 43 | 44 | 45 | 46 | 47 | 51 | | 52 | | | 53 | 54 | | | 55 | 56 | 57 | 60 | | 61 | | 62 | | 63 | 64 | 65 | | | 66 | 67 |
| **Typical site forms according to Benning et al. (2015)** | | | | | | | | | | | | | | | | | | | | | | | | | | | | | |
| **Water budget levels** | | | | | | | | | **Trophy levels** | | | | | | | | | **Relief/ Exposition** | | | | | | | | | | | |
| S3, S4 | | | | | | | | | mo | | | | | | | | | Plane, Shady slope, Sunny slope | | | | | | | | | | | |
| **Typical community parameter ranges** | | | | | | | | | | | | | | | | | | | | | | | | | | | | | |
| **Lower limit (fuzzy)** | | | | | **Lower limit of optimum** | | | | | | | | | | **Upper limit of optimum** | | | | | | | | **Upper limit (fuzzy)** | | | | | | |
| **Base saturation (according to Kappen-Adrian) [%]** | | | | | | | | | | | | | | | | | | | | | | | | | | | | | |
| 28 | | | | | 38 | | | | | | | | | | 76 | | | | | | | | 85 | | | | | | |
| **pHH2O [-]** | | | | | | | | | | | | | | | | | | | | | | | | | | | | | |
| 5 | | | | | 5.2 | | | | | | | | | | 6.0 | | | | | | | | 6.2 | | | | | | |
| **C/N ratio in humus and 10 cm mineral soil layer [%C/%N]** | | | | | | | | | | | | | | | | | | | | | | | | | | | | | |
| 16 | | | | | 17 | | | | | | | | | | 21 | | | | | | | | 22 | | | | | | |
| **Volumetric water content in the rooted soil layer [%]** | | | | | | | | | | | | | | | | | | | | | | | | | | | | | |
| 8 | | | | | 12 | | | | | | | | | | 14 | | | | | | | | 14 | | | | | | |
| **Growing season length [d>10°TMT/a]** | | | | | | | | | | | | | | | | | | | | | | | | | | | | | |
| 200 | | | | | 207 | | | | | | | | | | 233 | | | | | | | | 240 | | | | | | |
| **Climatic water balance per vegetation month [mm/Veg.-Mon.]** | | | | | | | | | | | | | | | | | | | | | | | | | | | | | |
| -46 | | | | | -46 | | | | | | | | | | -14 | | | | | | | | -8 | | | | | | |
| **Solar radiation (PAR) in the growing season [kWh m-2 a-1]** | | | | | | | | | | | | | **Lower limit (fuzzy)** | | | | | | | | | **Upper limit (fuzzy)** | | | | | | | |
| 891 | | | | | | | | | 1136 | | | | | | | |
| **Lowest frost hardiness of all characteristic tree and shrub species (max. average annual low temperature) [°C]** | | | | | | | | | | | | | | | | | | | | | | | | | | | -20 | | |
| **Natural/near-natural combination of species** | | | | | | | | | | | | | | | | | | | | | | | | | | | | | |
| **Species** | | | | | | **Areal fraction [%]** | | | | | | **Species (english)** | | | | | | | | **Structural element** | | | | | | | | | |
| Quercus frainetto | | | | | | 70 | | | | | | Hungarian oak | | | | | | | | Main tree species 1 | | | | | | | | | |
| Anthoxanthum odoratum | | | | | | 10 | | | | | | Sweet vernal grass | | | | | | | | Dominant herb species | | | | | | | | | |
| Luzula forsteri | | | | | | 1 | | | | | | Southern woodrush | | | | | | | | Character herb species | | | | | | | | | |
| Galium pseudoaristatum | | | | | | 1 | | | | | | Awned bedstraw | | | | | | | | Character herb species | | | | | | | | | |
| Vicia cracca | | | | | | 1 | | | | | | Tufted vetch | | | | | | | | Character herb species | | | | | | | | | |
| Potentilla micrantha | | | | | | 1 | | | | | | European cinquefoil | | | | | | | | Character herb species | | | | | | | | | |
| Lathyrus laxiflorus | | | | | | 1 | | | | | |  | | | | | | | | Character herb species | | | | | | | | | |
| Hueti cynapioidis | | | | | | 1 | | | | | | Dog parsley bulbous umbel | | | | | | | | Character herb species | | | | | | | | | |

# **Ilici-Fagetum sylvatici BRAUN-BLANQUET 1967**

| **Synonym** | | | | **1.Sources of the community relevées** | | | | | | | | | | | | | | | | | | | | | | **No. of relevées** | | | |
| --- | --- | --- | --- | --- | --- | --- | --- | --- | --- | --- | --- | --- | --- | --- | --- | --- | --- | --- | --- | --- | --- | --- | --- | --- | --- | --- | --- | --- | --- |
| **2. EUNIS-Code, mapped EUNIS class** | | | | | | | | | | | | | | | | | | | | | |
| Holly-Beech forest | | | | 1. Oberdorfer (1992) Vol IV, Tab. 295/2 and Text Vol. p. 118 | | | | | | | | | | | | | | | | | | | | | | 114 | | | |
| 2. T1821, T181 - Medio-European acidophilous Fagus forests | | | | | | | | | | | | | | | | | | | | | |
| **Possible climate classes** | | | | | | | | | | | | | | | | | | | | | | | | | | | | | |
| 06 | 07 | 14 | 15 | | 16 | | 17 | 23 | | 24 | 25 | | | 26 | 27 | 31 | 32 | 33 | | | 34 | | 35 | 36 | 37 | | | 41 | 42 |
| 43 | 44 | 45 | 46 | | 47 | | 51 | 52 | | 53 | 54 | | | 55 | 56 | 57 | 60 | 61 | | | 62 | | 63 | 64 | 65 | | | 66 | 67 |
| **Typical site forms according to Benning et al. (2015)** | | | | | | | | | | | | | | | | | | | | | | | | | | | | | |
| **Water budget levels** | | | | | | | | | **Trophy levels** | | | | | | | | | | **Relief/ Exposition** | | | | | | | | | | |
| T1, T2, T3, T4, S0, S1, S2 | | | | | | | | | m | | | | | | | | | | Plane, Shady slope, Sunny slope | | | | | | | | | | |
| **Typical community parameter ranges** | | | | | | | | | | | | | | | | | | | | | | | | | | | | | |
| **Lower limit (fuzzy)** | | | | | | | **Lower limit of optimum** | | | | | | | | **Upper limit of optimum** | | | | | | | | **Upper limit (fuzzy)** | | | | | | |
| **Base saturation (according to Kappen-Adrian) [%]** | | | | | | | | | | | | | | | | | | | | | | | | | | | | | |
| 6 | | | | | | | 10 | | | | | | | | 24 | | | | | | | | 27 | | | | | | |
| **pHH2O [-]** | | | | | | | | | | | | | | | | | | | | | | | | | | | | | |
| 3.3 | | | | | | | 3.6 | | | | | | | | 4.6 | | | | | | | | 4.9 | | | | | | |
| **C/N ratio in humus and 10 cm mineral soil layer [%C/%N]** | | | | | | | | | | | | | | | | | | | | | | | | | | | | | |
| 18 | | | | | | | 20 | | | | | | | | 29 | | | | | | | | 31 | | | | | | |
| **Volumetric water content in the rooted soil layer [%]** | | | | | | | | | | | | | | | | | | | | | | | | | | | | | |
| 7 | | | | | | | 18 | | | | | | | | 26 | | | | | | | | 27 | | | | | | |
| **Growing season length [d>10°TMT/a]** | | | | | | | | | | | | | | | | | | | | | | | | | | | | | |
| 175 | | | | | | | 181 | | | | | | | | 204 | | | | | | | | 210 | | | | | | |
| **Climatic water balance per vegetation month [mm/Veg.-Mon.]** | | | | | | | | | | | | | | | | | | | | | | | | | | | | | |
| -12 | | | | | | | 2 | | | | | | | | 65 | | | | | | | | 70 | | | | | | |
| **Solar radiation (PAR) in the growing season [kWh m-2 a-1]** | | | | | | | | | | | | | **Lower limit (fuzzy)** | | | | | | | | | **Upper limit (fuzzy)** | | | | | | | |
| 525 | | | | | | | | | 952 | | | | | | | |
| **Lowest frost hardiness of all characteristic tree and shrub species (max. average annual low temperature) [°C]** | | | | | | | | | | | | | | | | | | | | | | | | | | | -20 | | |
| **Natural/near-natural combination of species** | | | | | | | | | | | | | | | | | | | | | | | | | | | | | |
| **Species** | | | | | | **Areal fraction [%]** | | | | | | **Species (english)** | | | | | | | | **Structural element** | | | | | | | | | |
| Fagus sylvatica | | | | | | 50 | | | | | | European beech | | | | | | | | Main tree species 1 | | | | | | | | | |
| Betula pendula | | | | | | 10 | | | | | | Silver birch | | | | | | | | Secondary tree species | | | | | | | | | |
| Quercus petraea | | | | | | 20 | | | | | | Sessile oak | | | | | | | | Mixed tree species | | | | | | | | | |
| Castanea sativa | | | | | | 40 | | | | | | Chestnut | | | | | | | | Main tree species 2 | | | | | | | | | |
| Acer pseudoplatanus | | | | | | 5 | | | | | | Golden sycamore | | | | | | | | Secondary tree species | | | | | | | | | |
| Ilex aquifolium | | | | | | 40 | | | | | | English holly | | | | | | | | Intermediate tree layer | | | | | | | | | |
| Vaccinium myrtillus | | | | | | 10 | | | | | | Blueberry | | | | | | | | Dominant herb species | | | | | | | | | |
| Polytrichum formosum | | | | | | 30 | | | | | | Beauty haircap moss | | | | | | | | Dominant moss species | | | | | | | | | |

# **Irido-Alnetum glutinosae DOING 1962**

| **Synonym** | | | | **1.Sources of the community relevées** | | | | | | | | | | | | | | | | | | | | | **No. of relevées** | | | |
| --- | --- | --- | --- | --- | --- | --- | --- | --- | --- | --- | --- | --- | --- | --- | --- | --- | --- | --- | --- | --- | --- | --- | --- | --- | --- | --- | --- | --- |
| **2. EUNIS-Code, mapped EUNIS class** | | | | | | | | | | | | | | | | | | | | |
| Iris-Black alder forest | | | | 1. Passarge et Hofmann (1968) Tab. 4b (also Schmidt (2002) 11.1.2, Tab. 2/8/3.3; Berg et al 2001 Tab. 30.2.2.2 and Text p. 445) | | | | | | | | | | | | | | | | | | | | | 74 | | | |
| 2. T1511 - Meso-eutrophic swamp alder forests | | | | | | | | | | | | | | | | | | | | |
| **Possible climate classes** | | | | | | | | | | | | | | | | | | | | | | | | | | | | |
| 06 | 07 | 14 | 15 | | 16 | 17 | 23 | | 24 | | 25 | | 26 | 27 | 31 | 32 | 33 | | | 34 | | 35 | 36 | 37 | | | 41 | 42 |
| 43 | 44 | 45 | 46 | | 47 | 51 | 52 | | 53 | | 54 | | 55 | 56 | 57 | 60 | 61 | | | 62 | | 63 | 64 | 65 | | | 66 | 67 |
| **Typical site forms according to Benning et al. (2015)** | | | | | | | | | | | | | | | | | | | | | | | | | | | | |
| **Water budget levels** | | | | | | | | **Trophy levels** | | | | | | | | | | **Relief/ Exposition** | | | | | | | | | | |
| G4 | | | | | | | | mo | | | | | | | | | | Plane, Shady slope, Sunny slope | | | | | | | | | | |
| **Typical community parameter ranges** | | | | | | | | | | | | | | | | | | | | | | | | | | | | |
| **Lower limit (fuzzy)** | | | | | | **Lower limit of optimum** | | | | | | | | **Upper limit of optimum** | | | | | | | | **Upper limit (fuzzy)** | | | | | | |
| **Base saturation (according to Kappen-Adrian) [%]** | | | | | | | | | | | | | | | | | | | | | | | | | | | | |
| 25 | | | | | | 30 | | | | | | | | 48 | | | | | | | | 52 | | | | | | |
| **pHH2O [-]** | | | | | | | | | | | | | | | | | | | | | | | | | | | | |
| 4.7 | | | | | | 5.0 | | | | | | | | 6.1 | | | | | | | | 6.4 | | | | | | |
| **C/N ratio in humus and 10 cm mineral soil layer [%C/%N]** | | | | | | | | | | | | | | | | | | | | | | | | | | | | |
| 15 | | | | | | 18 | | | | | | | | 28 | | | | | | | | 31 | | | | | | |
| **Volumetric water content in the rooted soil layer [%]** | | | | | | | | | | | | | | | | | | | | | | | | | | | | |
| 40 | | | | | | 43 | | | | | | | | 55 | | | | | | | | 58 | | | | | | |
| **Growing season length [d>10°TMT/a]** | | | | | | | | | | | | | | | | | | | | | | | | | | | | |
| 130 | | | | | | 143 | | | | | | | | 197 | | | | | | | | 210 | | | | | | |
| **Climatic water balance per vegetation month [mm/Veg.-Mon.]** | | | | | | | | | | | | | | | | | | | | | | | | | | | | |
| -46 | | | | | | -43 | | | | | | | | 2 | | | | | | | | 11 | | | | | | |
| **Solar radiation (PAR) in the growing season [kWh m-2 a-1]** | | | | | | | | | | | | **Lower limit (fuzzy)** | | | | | | | | | **Upper limit (fuzzy)** | | | | | | | |
| 347 | | | | | | | | | 622 | | | | | | | |
| **Lowest frost hardiness of all characteristic tree and shrub species (max. average annual low temperature) [°C]** | | | | | | | | | | | | | | | | | | | | | | | | | | -28 | | |
| **Natural/near-natural combination of species** | | | | | | | | | | | | | | | | | | | | | | | | | | | | |
| **Species** | | | | **Areal fraction [%]** | | | | | | **Species (english)** | | | | | | | | | **Structural element** | | | | | | | | | |
| Alnus glutinosa | | | | 70 | | | | | | Common alder | | | | | | | | | Main tree species 1 | | | | | | | | | |
| Fraxinus excelsior | | | | 1 | | | | | | Common ash | | | | | | | | | Secondary tree species | | | | | | | | | |
| Carex acutiformis | | | | 40 | | | | | | Lesser pond-sedge | | | | | | | | | Dominant herb species | | | | | | | | | |
| Urtica dioica | | | | 10 | | | | | | Stinging nettle | | | | | | | | | Dominant herb species | | | | | | | | | |
| Iris pseudacorus | | | | 5 | | | | | | Yellow water iris | | | | | | | | | Dominant herb species | | | | | | | | | |
| Rhamnus frangula | | | | 5 | | | | | | Alder buckthorn | | | | | | | | | Upper tree/shrub layer | | | | | | | | | |

# **Juglando-Platanetum orientalis EM et DEKOV 1961**

| **Synonym** | | | | **1.Sources of the community relevées** | | | | | | | | | | | | | | | | | | | | | | **No. of relevées** | | | |
| --- | --- | --- | --- | --- | --- | --- | --- | --- | --- | --- | --- | --- | --- | --- | --- | --- | --- | --- | --- | --- | --- | --- | --- | --- | --- | --- | --- | --- | --- |
| **2. EUNIS-Code, mapped EUNIS class** | | | | | | | | | | | | | | | | | | | | | |
| Walnut-Oriental plane tree forest | | | | 1. Horvat, Glavac, Ellenberg (1974) Tab. 31 (also: Fotiadi 2004 tab. 8 p.35) | | | | | | | | | | | | | | | | | | | | | | 33 | | | |
| 2. T1491, T14 - Mediterranean and Macaronesian riparian forest | | | | | | | | | | | | | | | | | | | | | |
| **Possible climate classes** | | | | | | | | | | | | | | | | | | | | | | | | | | | | | |
| 06 | 07 | 14 | 15 | | 16 | | 17 | 23 | | 24 | 25 | | | 26 | 27 | 31 | 32 | | 33 | | 34 | | 35 | 36 | 37 | | | 41 | 42 |
| 43 | 44 | 45 | 46 | | 47 | | 51 | 52 | | 53 | 54 | | | 55 | 56 | 57 | 60 | | 61 | | 62 | | 63 | 64 | 65 | | | 66 | 67 |
| **Typical site forms according to Benning et al. (2015)** | | | | | | | | | | | | | | | | | | | | | | | | | | | | | |
| **Water budget levels** | | | | | | | | | **Trophy levels** | | | | | | | | | **Relief/ Exposition** | | | | | | | | | | | |
| G2, S4, S5 | | | | | | | | | mo | | | | | | | | | Plane, Shady slope, Sunny slope | | | | | | | | | | | |
| **Typical community parameter ranges** | | | | | | | | | | | | | | | | | | | | | | | | | | | | | |
| **Lower limit (fuzzy)** | | | | | | | **Lower limit of optimum** | | | | | | | | **Upper limit of optimum** | | | | | | | | **Upper limit (fuzzy)** | | | | | | |
| **Base saturation (according to Kappen-Adrian) [%]** | | | | | | | | | | | | | | | | | | | | | | | | | | | | | |
| 27 | | | | | | | 39 | | | | | | | | 88 | | | | | | | | 100 | | | | | | |
| **pHH2O [-]** | | | | | | | | | | | | | | | | | | | | | | | | | | | | | |
| 4.9 | | | | | | | 5.3 | | | | | | | | 6.7 | | | | | | | | >7 | | | | | | |
| **C/N ratio in humus and 10 cm mineral soil layer [%C/%N]** | | | | | | | | | | | | | | | | | | | | | | | | | | | | | |
| 15 | | | | | | | 17 | | | | | | | | 24 | | | | | | | | 26 | | | | | | |
| **Volumetric water content in the rooted soil layer [%]** | | | | | | | | | | | | | | | | | | | | | | | | | | | | | |
| 12 | | | | | | | 22 | | | | | | | | 26 | | | | | | | | 27 | | | | | | |
| **Growing season length [d>10°TMT/a]** | | | | | | | | | | | | | | | | | | | | | | | | | | | | | |
| 220 | | | | | | | 227 | | | | | | | | 253 | | | | | | | | 260 | | | | | | |
| **Climatic water balance per vegetation month [mm/Veg.-Mon.]** | | | | | | | | | | | | | | | | | | | | | | | | | | | | | |
| -46 | | | | | | | -45 | | | | | | | | 42 | | | | | | | | 59 | | | | | | |
| **Solar radiation (PAR) in the growing season [kWh m-2 a-1]** | | | | | | | | | | | | | **Lower limit (fuzzy)** | | | | | | | | | **Upper limit (fuzzy)** | | | | | | | |
| 944 | | | | | | | | | 975 | | | | | | | |
| **Lowest frost hardiness of all characteristic tree and shrub species (max. average annual low temperature) [°C]** | | | | | | | | | | | | | | | | | | | | | | | | | | | -17 | | |
| **Natural/near-natural combination of species** | | | | | | | | | | | | | | | | | | | | | | | | | | | | | |
| **Species** | | | | | | **Areal fraction [%]** | | | | | | **Species (english)** | | | | | | | | **Structural element** | | | | | | | | | |
| Platanus orientalis | | | | | | 20 | | | | | | Oriental plane tree | | | | | | | | Main tree species 1 | | | | | | | | | |
| Juglans regia | | | | | | 5 | | | | | | Common walnut | | | | | | | | Mixed tree species | | | | | | | | | |
| Dactylis glomerata | | | | | | 15 | | | | | | Cocksfoot | | | | | | | | Dominant herb species | | | | | | | | | |
| Poa nemoralis | | | | | | 30 | | | | | | Wood bluegrass | | | | | | | | Dominant herb species | | | | | | | | | |
| Urtica dioica | | | | | | 30 | | | | | | Stinging nettle | | | | | | | | Dominant herb species | | | | | | | | | |
| Ranunculus ficaria | | | | | | 30 | | | | | | Lesser celandine | | | | | | | | Dominant herb species | | | | | | | | | |
| Cornus sanguinea | | | | | | 5 | | | | | | Bloodtwig dogwood | | | | | | | | Upper tree/shrub layer | | | | | | | | | |
| Rubus ulmifolius | | | | | | 10 | | | | | | Elm leaf blackberry | | | | | | | | Upper tree/shrub layer | | | | | | | | | |
| Crataegus monogyna | | | | | | 5 | | | | | | Common hawthorn | | | | | | | | Intermediate tree layer | | | | | | | | | |
| Rosa arvensis | | | | | | 3 | | | | | | Field rose | | | | | | | | Upper tree/shrub layer | | | | | | | | | |

# **Junco-Fraxinetum parvifoliae KÁPÁTI 1962**

| **Synonym** | | | | | | **1.Sources of the community relevées** | | | | | | | | | | | | | | | | | | | | **No. of relevées** | | | |
| --- | --- | --- | --- | --- | --- | --- | --- | --- | --- | --- | --- | --- | --- | --- | --- | --- | --- | --- | --- | --- | --- | --- | --- | --- | --- | --- | --- | --- | --- |
| **2. EUNIS-Code, mapped EUNIS class** | | | | | | | | | | | | | | | | | | | |
| Narrow-leaved rush forest | | | | | | 1. Horvat, Glavac, Ellenberg (1974) Tab. 40/1 (also Douda et al. 2016 Tab. C23; Karpati 1962 Tab. III) | | | | | | | | | | | | | | | | | | | | 25 | | | |
| 2. T131324, T14 - Mediterranean and Macaronesian riparian forest | | | | | | | | | | | | | | | | | | | |
| **Possible climate classes** | | | | | | | | | | | | | | | | | | | | | | | | | | | | | |
| 06 | 07 | 14 | 15 | 16 | | | 17 | 23 | 24 | | 25 | | | 26 | 27 | 31 | 32 | 33 | | | 34 | | 35 | 36 | 37 | | | 41 | 42 |
| 43 | 44 | 45 | 46 | 47 | | | 51 | 52 | 53 | | 54 | | | 55 | 56 | 57 | 60 | 61 | | | 62 | | 63 | 64 | 65 | | | 66 | 67 |
| **Typical site forms according to Benning et al. (2015)** | | | | | | | | | | | | | | | | | | | | | | | | | | | | | |
| **Water budget levels** | | | | | | | | | | **Trophy levels** | | | | | | | | | **Relief/ Exposition** | | | | | | | | | | |
| G4, G5, S5 | | | | | | | | | | e | | | | | | | | | Plane, Shady slope, Sunny slope | | | | | | | | | | |
| **Typical community parameter ranges** | | | | | | | | | | | | | | | | | | | | | | | | | | | | | |
| **Lower limit (fuzzy)** | | | | | | | **Lower limit of optimum** | | | | | | | | **Upper limit of optimum** | | | | | | | | **Upper limit (fuzzy)** | | | | | | |
| **Base saturation (according to Kappen-Adrian) [%]** | | | | | | | | | | | | | | | | | | | | | | | | | | | | | |
| 45 | | | | | | | 45 | | | | | | | | 100 | | | | | | | | 100 | | | | | | |
| **pHH2O [-]** | | | | | | | | | | | | | | | | | | | | | | | | | | | | | |
| 6.2 | | | | | | | 6.2 | | | | | | | | 7 | | | | | | | | >7 | | | | | | |
| **C/N ratio in humus and 10 cm mineral soil layer [%C/%N]** | | | | | | | | | | | | | | | | | | | | | | | | | | | | | |
| 15 | | | | | | | 15 | | | | | | | | 26 | | | | | | | | 26 | | | | | | |
| **Volumetric water content in the rooted soil layer [%]** | | | | | | | | | | | | | | | | | | | | | | | | | | | | | |
| 12 | | | | | | | 12 | | | | | | | | 21 | | | | | | | | 21 | | | | | | |
| **Growing season length [d>10°TMT/a]** | | | | | | | | | | | | | | | | | | | | | | | | | | | | | |
| 220 | | | | | | | 220 | | | | | | | | 260 | | | | | | | | 260 | | | | | | |
| **Climatic water balance per vegetation month [mm/Veg.-Mon.]** | | | | | | | | | | | | | | | | | | | | | | | | | | | | | |
| -12 | | | | | | | -12 | | | | | | | | 69 | | | | | | | | 70 | | | | | | |
| **Solar radiation (PAR) in the growing season [kWh m-2 a-1]** | | | | | | | | | | | | | **Lower limit (fuzzy)** | | | | | | | | | **Upper limit (fuzzy)** | | | | | | | |
| 858 | | | | | | | | | 974 | | | | | | | |
| **Lowest frost hardiness of all characteristic tree and shrub species (max. average annual low temperature) [°C]** | | | | | | | | | | | | | | | | | | | | | | | | | | | -20 | | |
| **Natural/near-natural combination of species** | | | | | | | | | | | | | | | | | | | | | | | | | | | | | |
| **Species** | | | | | **Areal fraction [%]** | | | | | | | **Species (english)** | | | | | | | | **Structural element** | | | | | | | | | |
| Alnus glutinosa | | | | | 10 | | | | | | | Common alder | | | | | | | | Main tree species 2 | | | | | | | | | |
| Fraxinus angustifolia | | | | | 60 | | | | | | | Narrow-leaved ash | | | | | | | | Main tree species 1 | | | | | | | | | |
| Agrostis frondosa | | | | | 10 | | | | | | |  | | | | | | | | Dominant herb species | | | | | | | | | |
| Juncus acutus | | | | | 30 | | | | | | | Ragged rush | | | | | | | | Dominant herb species | | | | | | | | | |
| Tamus communis | | | | | 20 | | | | | | | Black bryony | | | | | | | | Dominant herb species | | | | | | | | | |
| Periploca graeca | | | | | 10 | | | | | | | Silk vine | | | | | | | | Upper tree/shrub layer | | | | | | | | | |
| Rubus ulmifolius | | | | | 3 | | | | | | | Elm leaf blackberry | | | | | | | | Upper tree/shrub layer | | | | | | | | | |

# **Juniperetum communis-thuriferae VAGGE et BIONDI 2008**

| **Synonym** | | | | **1.Sources of the community relevées** | | | | | | | | | | | | | | | | | | | | **No. of relevées** | | | | | |
| --- | --- | --- | --- | --- | --- | --- | --- | --- | --- | --- | --- | --- | --- | --- | --- | --- | --- | --- | --- | --- | --- | --- | --- | --- | --- | --- | --- | --- | --- |
| **2. EUNIS-Code, mapped EUNIS class** | | | | | | | | | | | | | | | | | | | |
| Incense-Juniper forest | | | | 1. Vagge et Biondi 2008 Tab. 2 | | | | | | | | | | | | | | | | | | | | 11 | | | | | |
| 2. T3D6 - Spanish Juniperus thurifera forests | | | | | | | | | | | | | | | | | | | |
| **Possible climate classes** | | | | | | | | | | | | | | | | | | | | | | | | | | | | | |
| 06 | 07 | 14 | 15 | | 16 | | 17 | 23 | | 24 | 25 | | | 26 | 27 | 31 | 32 | 33 | | | 34 | | 35 | | 36 | 37 | | 41 | 42 |
| 43 | 44 | 45 | 46 | | 47 | | 51 | 52 | | 53 | 54 | | | 55 | 56 | 57 | 60 | 61 | | | 62 | | 63 | | 64 | 65 | | 66 | 67 |
| **Typical site forms according to Benning et al. (2015)** | | | | | | | | | | | | | | | | | | | | | | | | | | | | | |
| **Water budget levels** | | | | | | | | | **Trophy levels** | | | | | | | | | | **Relief/ Exposition** | | | | | | | | | | |
| T1, T2 | | | | | | | | | e | | | | | | | | | | Sunny slope | | | | | | | | | | |
| **Typical community parameter ranges** | | | | | | | | | | | | | | | | | | | | | | | | | | | | | |
| **Lower limit (fuzzy)** | | | | | | | **Lower limit of optimum** | | | | | | | | **Upper limit of optimum** | | | | | | | | **Upper limit (fuzzy)** | | | | | | |
| **Base saturation (according to Kappen-Adrian) [%]** | | | | | | | | | | | | | | | | | | | | | | | | | | | | | |
| 36 | | | | | | | 49 | | | | | | | | 100 | | | | | | | | 100 | | | | | | |
| **pHH2O [-]** | | | | | | | | | | | | | | | | | | | | | | | | | | | | | |
| 5.8 | | | | | | | 6.2 | | | | | | | | 7.6 | | | | | | | | 8 | | | | | | |
| **C/N ratio in humus and 10 cm mineral soil layer [%C/%N]** | | | | | | | | | | | | | | | | | | | | | | | | | | | | | |
| 15 | | | | | | | 16 | | | | | | | | 21 | | | | | | | | 22 | | | | | | |
| **Volumetric water content in the rooted soil layer [%]** | | | | | | | | | | | | | | | | | | | | | | | | | | | | | |
| 6 | | | | | | | 8 | | | | | | | | 15 | | | | | | | | 17 | | | | | | |
| **Growing season length [d>10°TMT/a]** | | | | | | | | | | | | | | | | | | | | | | | | | | | | | |
| 160 | | | | | | | 174 | | | | | | | | 231 | | | | | | | | 245 | | | | | | |
| **Climatic water balance per vegetation month [mm/Veg.-Mon.]** | | | | | | | | | | | | | | | | | | | | | | | | | | | | | |
| -27 | | | | | | | -11 | | | | | | | | 65 | | | | | | | | 70 | | | | | | |
| **Solar radiation (PAR) in the growing season [kWh m-2 a-1]** | | | | | | | | | | | | | **Lower limit (fuzzy)** | | | | | | | | | **Upper limit (fuzzy)** | | | | | | | |
| 689 | | | | | | | | | 912 | | | | | | | |
| **Lowest frost hardiness of all characteristic tree and shrub species (max. average annual low temperature) [°C]** | | | | | | | | | | | | | | | | | | | | | | | | | | | -12 | | |
| **Natural/near-natural combination of species** | | | | | | | | | | | | | | | | | | | | | | | | | | | | | |
| **Species** | | | | | | **Areal fraction [%]** | | | | | | **Species (english)** | | | | | | | | **Structural element** | | | | | | | | | |
| Quercus pubescens | | | | | | 2 | | | | | | Downy oak | | | | | | | | Secondary tree species | | | | | | | | | |
| Juniperus thurifera | | | | | | 60 | | | | | | Incense juniper | | | | | | | | Main tree species 1 | | | | | | | | | |
| Teucrium chamaedrys | | | | | | 5 | | | | | | Wall germander | | | | | | | | Dominant herb species | | | | | | | | | |
| Satureja montana | | | | | | 5 | | | | | | Mountain savory | | | | | | | | Dominant herb species | | | | | | | | | |
| Amelanchier ovalis | | | | | | 25 | | | | | | Snowy mespilus | | | | | | | | Intermediate tree layer | | | | | | | | | |
| Juniperus communis | | | | | | 5 | | | | | | Common juniper | | | | | | | | Upper tree/shrub layer | | | | | | | | | |
| Rosa canina | | | | | | 2 | | | | | | Dog rose | | | | | | | | Upper tree/shrub layer | | | | | | | | | |
| Juniperus phoenicea | | | | | | 25 | | | | | | Phoenician juniper | | | | | | | | Mixed tree species | | | | | | | | | |
| Lavandula angustifolia | | | | | | 1 | | | | | | Lavender | | | | | | | | Upper tree/shrub layer | | | | | | | | | |

# **Larici-Pinetum cembrae LEANDRU 1954**

| **Synonym** | | | | | | | | **1.Sources of the community relevées** | | | | | | | | | | | | | | | | | | | **No. of relevées** | | | |
| --- | --- | --- | --- | --- | --- | --- | --- | --- | --- | --- | --- | --- | --- | --- | --- | --- | --- | --- | --- | --- | --- | --- | --- | --- | --- | --- | --- | --- | --- | --- |
| **2. EUNIS-Code, mapped EUNIS class** | | | | | | | | | | | | | | | | | | |
| Larch-Swiss stone pine forest  Vaccinio-Pinetum cembrae  (Pallmann et Haffter 1933) Oberd. 1962 | | | | | | | | 1. Oberdorfer (1992) Vol IV, Table 273/14a and Text Vol. p. 75 (also Ellenberg et Klötzli 1972 p.738 with Keller et al. 1998) | | | | | | | | | | | | | | | | | | | 178 | | | |
| 2. T342, T34 - Temperate subalpine Larix, Pinus cembra and Pinus uncinata forest | | | | | | | | | | | | | | | | | | |
| **Possible climate classes** | | | | | | | | | | | | | | | | | | | | | | | | | | | | | | |
| 06 | 07 | 14 | 15 | 16 | | | 17 | | 23 | | 24 | 25 | | | 26 | 27 | 31 | 32 | 33 | | | 34 | | 35 | 36 | 37 | | | 41 | 42 |
| 43 | 44 | 45 | 46 | 47 | | | 51 | | 52 | | 53 | 54 | | | 55 | 56 | 57 | 60 | 61 | | | 62 | | 63 | 64 | 65 | | | 66 | 67 |
| **Typical site forms according to Benning et al. (2015)** | | | | | | | | | | | | | | | | | | | | | | | | | | | | | | |
| **Water budget levels** | | | | | | | | | | **Trophy levels** | | | | | | | | | | **Relief/ Exposition** | | | | | | | | | | |
| T1, T2, T3, T4, T5 | | | | | | | | | | om, m | | | | | | | | | | Plane, Shady slope, Sunny slope | | | | | | | | | | |
| **Typical community parameter ranges** | | | | | | | | | | | | | | | | | | | | | | | | | | | | | | |
| **Lower limit (fuzzy)** | | | | | | **Lower limit of optimum** | | | | | | | | | | **Upper limit of optimum** | | | | | | | | **Upper limit (fuzzy)** | | | | | | |
| **Base saturation (according to Kappen-Adrian) [%]** | | | | | | | | | | | | | | | | | | | | | | | | | | | | | | |
| 17 | | | | | | 19 | | | | | | | | | | 28 | | | | | | | | 30 | | | | | | |
| **pHH2O [-]** | | | | | | | | | | | | | | | | | | | | | | | | | | | | | | |
| 4 | | | | | | 4.2 | | | | | | | | | | 5.0 | | | | | | | | 5.2 | | | | | | |
| **C/N ratio in humus and 10 cm mineral soil layer [%C/%N]** | | | | | | | | | | | | | | | | | | | | | | | | | | | | | | |
| 18 | | | | | | 19 | | | | | | | | | | 25 | | | | | | | | 26 | | | | | | |
| **Volumetric water content in the rooted soil layer [%]** | | | | | | | | | | | | | | | | | | | | | | | | | | | | | | |
| 8 | | | | | | 10 | | | | | | | | | | 16 | | | | | | | | 18 | | | | | | |
| **Growing season length [d>10°TMT/a]** | | | | | | | | | | | | | | | | | | | | | | | | | | | | | | |
| 65 | | | | | | 76 | | | | | | | | | | 119 | | | | | | | | 130 | | | | | | |
| **Climatic water balance per vegetation month [mm/Veg.-Mon.]** | | | | | | | | | | | | | | | | | | | | | | | | | | | | | | |
| 11 | | | | | | 29 | | | | | | | | | | 99 | | | | | | | | 117 | | | | | | |
| **Solar radiation (PAR) in the growing season [kWh m-2 a-1]** | | | | | | | | | | | | | | **Lower limit (fuzzy)** | | | | | | | | | **Upper limit (fuzzy)** | | | | | | | |
| 262 | | | | | | | | | 592 | | | | | | | |
| **Lowest frost hardiness of all characteristic tree and shrub species (max. average annual low temperature) [°C]** | | | | | | | | | | | | | | | | | | | | | | | | | | | | -28 | | |
| **Natural/near-natural combination of species** | | | | | | | | | | | | | | | | | | | | | | | | | | | | | | |
| **Species** | | | | | **Areal fraction [%]** | | | | | | | | **Species (english)** | | | | | | | | **Structural element** | | | | | | | | | |
| Larix decidua | | | | | 15 | | | | | | | | European larch | | | | | | | | Main tree species 1 | | | | | | | | | |
| Pinus cembra | | | | | 15 | | | | | | | | Swiss stone pine | | | | | | | | Main tree species 2 | | | | | | | | | |
| Pinus mugo mugo | | | | | 15 | | | | | | | | Mountain pine | | | | | | | | Mixed tree species | | | | | | | | | |
| Carex ferruginea | | | | | 2 | | | | | | | | Rusty sedge | | | | | | | | Dominant herb species | | | | | | | | | |
| Vaccinium myrtillus | | | | | 10 | | | | | | | | Blueberry | | | | | | | | Dominant herb species | | | | | | | | | |
| Erica carnea | | | | | 20 | | | | | | | | Winter heath | | | | | | | | Dominant herb species | | | | | | | | | |
| Rhododendron hirsutum | | | | | 20 | | | | | | | | Hairy Alpine rose | | | | | | | | Upper tree/shrub layer | | | | | | | | | |
| Sorbus chamaemespilus | | | | | 5 | | | | | | | | Dwarf whitebeam | | | | | | | | Upper tree/shrub layer | | | | | | | | | |

# **Lathyro laxiﬂori–Castanetum sativae BRULLO et al. 2004**

| **Synonym** | | | | **1.Sources of the community relevées** | | | | | | | | | | | | | | | | | | | | | | | | **No. of relevées** | | | |
| --- | --- | --- | --- | --- | --- | --- | --- | --- | --- | --- | --- | --- | --- | --- | --- | --- | --- | --- | --- | --- | --- | --- | --- | --- | --- | --- | --- | --- | --- | --- | --- |
| **2. EUNIS-Code, mapped EUNIS class** | | | | | | | | | | | | | | | | | | | | | | | |
| Flat pea - Chestnut forest | | | | 1. Bergmeier et Dimopoulos 2008 Tab. 1/7 | | | | | | | | | | | | | | | | | | | | | | | | 15 | | | |
| 2. T19C3, T19C - Castanea sativa forest | | | | | | | | | | | | | | | | | | | | | | | |
| **Possible climate classes** | | | | | | | | | | | | | | | | | | | | | | | | | | | | | | | |
| 06 | 07 | 14 | 15 | | 16 | 17 | | 23 | | 24 | 25 | | 26 | | | 27 | 31 | 32 | 33 | | | 34 | | 35 | | 36 | 37 | | | 41 | 42 |
| 43 | 44 | 45 | 46 | | 47 | 51 | | 52 | | 53 | 54 | | 55 | | | 56 | 57 | 60 | 61 | | | 62 | | 63 | | 64 | 65 | | | 66 | 67 |
| **Typical site forms according to Benning et al. (2015)** | | | | | | | | | | | | | | | | | | | | | | | | | | | | | | | |
| **Water budget levels** | | | | | | | | | **Trophy levels** | | | | | | | | | | | **Relief/ Exposition** | | | | | | | | | | | |
| T1, T2, T3, T4, T5 | | | | | | | | | om | | | | | | | | | | | Plane, Shady slope, Sunny slope | | | | | | | | | | | |
| **Typical community parameter ranges** | | | | | | | | | | | | | | | | | | | | | | | | | | | | | | | |
| **Lower limit (fuzzy)** | | | | | | **Lower limit of optimum** | | | | | | | | | | **Upper limit of optimum** | | | | | | | | **Upper limit (fuzzy)** | | | | | | | |
| **Base saturation (according to Kappen-Adrian) [%]** | | | | | | | | | | | | | | | | | | | | | | | | | | | | | | | |
| 12 | | | | | | 19 | | | | | | | | | | 48 | | | | | | | | 55 | | | | | | | |
| **pHH2O [-]** | | | | | | | | | | | | | | | | | | | | | | | | | | | | | | | |
| 3.7 | | | | | | 4.1 | | | | | | | | | | 5.8 | | | | | | | | 6.2 | | | | | | | |
| **C/N ratio in humus and 10 cm mineral soil layer [%C/%N]** | | | | | | | | | | | | | | | | | | | | | | | | | | | | | | | |
| 15 | | | | | | 17 | | | | | | | | | | 24 | | | | | | | | 26 | | | | | | | |
| **Volumetric water content in the rooted soil layer [%]** | | | | | | | | | | | | | | | | | | | | | | | | | | | | | | | |
| 5 | | | | | | 16 | | | | | | | | | | 21 | | | | | | | | 22 | | | | | | | |
| **Growing season length [d>10°TMT/a]** | | | | | | | | | | | | | | | | | | | | | | | | | | | | | | | |
| 210 | | | | | | 225 | | | | | | | | | | 285 | | | | | | | | 300 | | | | | | | |
| **Climatic water balance per vegetation month [mm/Veg.-Mon.]** | | | | | | | | | | | | | | | | | | | | | | | | | | | | | | | |
| -22 | | | | -13 | | | | | | | | | | 65 | | | | | | | | | | | 70 | | | | | | |
| **Solar radiation (PAR) in the growing season [kWh m-2 a-1]** | | | | | | | | | | | | **Lower limit (fuzzy)** | | | | | | | | | | | **Upper limit (fuzzy)** | | | | | | | | |
| 1223 | | | | | | | | | | | 1514 | | | | | | | | |
| **Lowest frost hardiness of all characteristic tree and shrub species (max. average annual low temperature) [°C]** | | | | | | | | | | | | | | | | | | | | | | | | | | | | | -20 | | |
| **Natural/near-natural combination of species** | | | | | | | | | | | | | | | | | | | | | | | | | | | | | | | |
| Species | | | | | | | Areal fraction [%] | | | | | | | | Species (english) | | | | | | Structural element | | | | | | | | | | |
| Castanea sativa | | | | | | | 70 | | | | | | | | Chestnut | | | | | | Main tree species 1 | | | | | | | | | | |
| Lathyrus laxiﬂorum | | | | | | | 1 | | | | | | | | Flat pea | | | | | | Character herb species | | | | | | | | | | |
| Pteridium aquilinum | | | | | | | 10 | | | | | | | | Bracken | | | | | | Dominant herb species | | | | | | | | | | |

# **Lauro-Fraxinetum parvifoliae KÁPÁTI 1962**

| **Synonym** | | | | | **1.Sources of the community relevées** | | | | | | | | | | | | | | | | | | | | | **No. of relevées** | | | |
| --- | --- | --- | --- | --- | --- | --- | --- | --- | --- | --- | --- | --- | --- | --- | --- | --- | --- | --- | --- | --- | --- | --- | --- | --- | --- | --- | --- | --- | --- |
| **2. EUNIS-Code, mapped EUNIS class** | | | | | | | | | | | | | | | | | | | | |
| Laurel-Narrowleaf ash forest | | | | | 1. Horvat, Glavac, Ellenberg (1974) Tab. 40/2 (also: Karpati 1962 tab. V) | | | | | | | | | | | | | | | | | | | | | 10 | | | |
| 2. T131324, T13 - Temperate hardwood riparian forest | | | | | | | | | | | | | | | | | | | | |
| **Possible climate classes** | | | | | | | | | | | | | | | | | | | | | | | | | | | | | |
| 06 | 07 | 14 | 15 | 16 | | 17 | | 23 | | 24 | 25 | | 26 | | 27 | 31 | 32 | 33 | | | 34 | | 35 | 36 | 37 | | | 41 | 42 |
| 43 | 44 | 45 | 46 | 47 | | 51 | | 52 | | 53 | 54 | | 55 | | 56 | 57 | 60 | 61 | | | 62 | | 63 | 64 | 65 | | | 66 | 67 |
| **Typical site forms according to Benning et al. (2015)** | | | | | | | | | | | | | | | | | | | | | | | | | | | | | |
| **Water budget levels** | | | | | | | | | **Trophy levels** | | | | | | | | | | **Relief/ Exposition** | | | | | | | | | | |
| G2, S4, S5 | | | | | | | | | e | | | | | | | | | | Plane, Shady slope | | | | | | | | | | |
| **Typical community parameter ranges** | | | | | | | | | | | | | | | | | | | | | | | | | | | | | |
| **Lower limit (fuzzy)** | | | | | | **Lower limit of optimum** | | | | | | | | | **Upper limit of optimum** | | | | | | | | **Upper limit (fuzzy)** | | | | | | |
| **Base saturation (according to Kappen-Adrian) [%]** | | | | | | | | | | | | | | | | | | | | | | | | | | | | | |
| 45 | | | | | | 45 | | | | | | | | | 100 | | | | | | | | 100 | | | | | | |
| **pHH2O [-]** | | | | | | | | | | | | | | | | | | | | | | | | | | | | | |
| 6.2 | | | | | | 6.2 | | | | | | | | | 7.0 | | | | | | | | >7 | | | | | | |
| **C/N ratio in humus and 10 cm mineral soil layer [%C/%N]** | | | | | | | | | | | | | | | | | | | | | | | | | | | | | |
| 15 | | | | | | 15 | | | | | | | | | 22 | | | | | | | | 22 | | | | | | |
| **Volumetric water content in the rooted soil layer [%]** | | | | | | | | | | | | | | | | | | | | | | | | | | | | | |
| 12 | | | | | | 12 | | | | | | | | | 21 | | | | | | | | 21 | | | | | | |
| **Growing season length [d>10°TMT/a]** | | | | | | | | | | | | | | | | | | | | | | | | | | | | | |
| 220 | | | | | | 220 | | | | | | | | | 260 | | | | | | | | 260 | | | | | | |
| **Climatic water balance per vegetation month [mm/Veg.-Mon.]** | | | | | | | | | | | | | | | | | | | | | | | | | | | | | |
| -12 | | | | | | -12 | | | | | | | | | 70 | | | | | | | | 70 | | | | | | |
| **Solar radiation (PAR) in the growing season [kWh m-2 a-1]** | | | | | | | | | | | | **Lower limit (fuzzy)** | | | | | | | | | | **Upper limit (fuzzy)** | | | | | | | |
| 957 | | | | | | | | | | 982 | | | | | | | |
| **Lowest frost hardiness of all characteristic tree and shrub species (max. average annual low temperature) [°C]** | | | | | | | | | | | | | | | | | | | | | | | | | | | -16 | | |
| **Natural/near-natural combination of species** | | | | | | | | | | | | | | | | | | | | | | | | | | | | | |
| **Species** | | | | | | | **Areal fraction [%]** | | | | | | | **Species (english)** | | | | | | **Structural element** | | | | | | | | | |
| Fraxinus angustifolia | | | | | | | 60 | | | | | | | Narrow-leaved ash | | | | | | Main tree species 1 | | | | | | | | | |
| Quercus robur | | | | | | | 10 | | | | | | | Pedunculate oak | | | | | | Main tree species 2 | | | | | | | | | |
| Cercis siliquastrum | | | | | | | 10 | | | | | | | Judas tree | | | | | | Intermediate tree layer | | | | | | | | | |
| Ulmus procera | | | | | | | 10 | | | | | | | English elm | | | | | | Intermediate tree layer | | | | | | | | | |
| Quercus coccifera | | | | | | | 10 | | | | | | | Kermes oak | | | | | | Intermediate tree layer | | | | | | | | | |
| Acer campestre | | | | | | | 10 | | | | | | | Hedge maple | | | | | | Mixed tree species | | | | | | | | | |
| Hedera helix | | | | | | | 40 | | | | | | | English ivy | | | | | | Dominant herb species | | | | | | | | | |
| Calystegia sepium | | | | | | | 60 | | | | | | | Hedge bindweed | | | | | | Dominant herb species | | | | | | | | | |
| Ruscus aculeatus | | | | | | | 40 | | | | | | | Butcher’s broom | | | | | | Upper tree/shrub layer | | | | | | | | | |
| Smilax Aspenra | | | | | | | 10 | | | | | | | Rough bindweed | | | | | | Upper tree/shrub layer | | | | | | | | | |
| Laurus nobilis | | | | | | | 10 | | | | | | | Bay laurel | | | | | | Upper tree/shrub layer | | | | | | | | | |

# **Lavandulo cariensis-Pinetum pineae VAROL et Tel (2010)**

| **Synonym** | | | | | **1.Sources of the community relevées** | | | | | | | | | | | | | | | | | | | | **No. of relevées** | | | | |
| --- | --- | --- | --- | --- | --- | --- | --- | --- | --- | --- | --- | --- | --- | --- | --- | --- | --- | --- | --- | --- | --- | --- | --- | --- | --- | --- | --- | --- | --- |
| **2. EUNIS-Code, mapped EUNIS class** | | | | | | | | | | | | | | | | | | | |
| Lavender-Mediterranean pine forest | | | | | 1. Varol et Tel (2010), Tab. 3 | | | | | | | | | | | | | | | | | | | | 15 | | | | |
| 2. N1G - Mediterranean coniferous coastal dune forest | | | | | | | | | | | | | | | | | | | |
| **Possible climate classes** | | | | | | | | | | | | | | | | | | | | | | | | | | | | | |
| 06 | 07 | 14 | 15 | 16 | | 17 | 23 | | 24 | 25 | | | | 26 | 27 | 31 | 32 | | 33 | 34 | | 35 | | 36 | | 37 | | 41 | 42 |
| 43 | 44 | 45 | 46 | 47 | | 51 | 52 | | 53 | 54 | | | | 55 | 56 | 57 | 60 | | 61 | 62 | | 63 | | 64 | | 65 | | 66 | 67 |
| **Typical site forms according to Benning et al. (2015)** | | | | | | | | | | | | | | | | | | | | | | | | | | | | | |
| **Water budget levels** | | | | | | | | **Trophy levels** | | | | | | | | | | **Relief/ Exposition** | | | | | | | | | | | |
| G2 | | | | | | | | m | | | | | | | | | | Plane, Shady slope, Sunny slope | | | | | | | | | | | |
| **Typical community parameter ranges** | | | | | | | | | | | | | | | | | | | | | | | | | | | | | |
| **Lower limit (fuzzy)** | | | | | | **Lower limit of optimum** | | | | | | | | | **Upper limit of optimum** | | | | | | | **Upper limit (fuzzy)** | | | | | | | |
| **Base saturation (according to Kappen-Adrian) [%]** | | | | | | | | | | | | | | | | | | | | | | | | | | | | | |
| 18 | | | | | | 23 | | | | | | | | | 41 | | | | | | | 45 | | | | | | | |
| **pHH2O [-]** | | | | | | | | | | | | | | | | | | | | | | | | | | | | | |
| 4.2 | | | | | | 4.5 | | | | | | | | | 5.7 | | | | | | | 6 | | | | | | | |
| **C/N ratio in humus and 10 cm mineral soil layer [%C/%N]** | | | | | | | | | | | | | | | | | | | | | | | | | | | | | |
| 16 | | | | | | 18 | | | | | | | | | 24 | | | | | | | 26 | | | | | | | |
| **Volumetric water content in the rooted soil layer [%]** | | | | | | | | | | | | | | | | | | | | | | | | | | | | | |
| 5 | | | | | | 8 | | | | | | | | | 18 | | | | | | | 21 | | | | | | | |
| **Growing season length [d>10°TMT/a]** | | | | | | | | | | | | | | | | | | | | | | | | | | | | | |
| 220 | | | | | | 233 | | | | | | | | | 287 | | | | | | | 300 | | | | | | | |
| **Climatic water balance per vegetation month [mm/Veg.-Mon.]** | | | | | | | | | | | | | | | | | | | | | | | | | | | | | |
| -46 | | | | | | -46 | | | | | | | | | 65 | | | | | | | 70 | | | | | | | |
| **Solar radiation (PAR) in the growing season [kWh m-2 a-1]** | | | | | | | | | | | | | **Lower limit (fuzzy)** | | | | | | | | **Upper limit (fuzzy)** | | | | | | | | |
| 912 | | | | | | | | 1217 | | | | | | | | |
| **Lowest frost hardiness of all characteristic tree and shrub species (max. average annual low temperature) [°C]** | | | | | | | | | | | | | | | | | | | | | | | | | | | -16 | | |
| **Natural/near-natural combination of species** | | | | | | | | | | | | | | | | | | | | | | | | | | | | | |
| **Species** | | | | | **Areal fraction [%]** | | | | | | | **Species (english)** | | | | | | | | | | | **Structural element** | | | | | | |
| Arbutus unedo | | | | | 5 | | | | | | | Western strawberry tree | | | | | | | | | | | Mixed tree species | | | | | | |
| Pinus pinea | | | | | 60 | | | | | | Mediterranean pine | | | | | | | | | | | | Main tree species 1 | | | | | | |
| Briza maxima | | | | | 5 | | | | | | | Greater quaking-grass | | | | | | | | | | | Dominant herb species | | | | | | |
| Dactylis glomerata | | | | | 5 | | | | | | | Cocksfoot | | | | | | | | | | | Dominant herb species | | | | | | |
| Stipa bromoides | | | | | 5 | | | | | | | Short-grass awlgrass | | | | | | | | | | | Dominant herb species | | | | | | |
| Erica manipuliflora | | | | | 5 | | | | | | | Grape heather | | | | | | | | | | | Upper tree/shrub layer | | | | | | |
| Lavandula stoechas | | | | | 5 | | | | | | | Crested lavender | | | | | | | | | | | Upper tree/shrub layer | | | | | | |
| Phillyrea latifolia | | | | | 5 | | | | | | | Broad-leaved stone lime | | | | | | | | | | | Intermediate tree layer | | | | | | |

# **Leucobryo-Pinetum sylvestris molienetosum MATUSZKIEWICZ 1962**

| **Synonym** | | | | | **1.Sources of the community relevées** | | | | | | | | | | | | | | | | | | | | | **No. of relevées** | | | |
| --- | --- | --- | --- | --- | --- | --- | --- | --- | --- | --- | --- | --- | --- | --- | --- | --- | --- | --- | --- | --- | --- | --- | --- | --- | --- | --- | --- | --- | --- |
| **2. EUNIS-Code, mapped EUNIS class** | | | | | | | | | | | | | | | | | | | | |
| White moss-Pine forest (Purple moor grass subass.) | | | | | 1. Matuszkiewicz (1962) Tab. 1/7 (also Hartmann et Jahn (1967) Tab. XIII/1 ; Schmidt (2002) 7.1.2, Tab. 2/6/1.3) | | | | | | | | | | | | | | | | | | | | | 109 | | | |
| 2. T3J5, T35 - Temperate continental Pinus sylvestris forest | | | | | | | | | | | | | | | | | | | | |
| **Possible climate classes** | | | | | | | | | | | | | | | | | | | | | | | | | | | | | |
| 06 | 07 | 14 | 15 | 16 | | | 17 | 23 | | 24 | 25 | | | 26 | 27 | 31 | 32 | 33 | | | 34 | | 35 | 36 | 37 | | | 41 | 42 |
| 43 | 44 | 45 | 46 | 47 | | | 51 | 52 | | 53 | 54 | | | 55 | 56 | 57 | 60 | 61 | | | 62 | | 63 | 64 | 65 | | | 66 | 67 |
| **Typical site forms according to Benning et al. (2015)** | | | | | | | | | | | | | | | | | | | | | | | | | | | | | |
| **Water budget levels** | | | | | | | | | **Trophy levels** | | | | | | | | | | **Relief/ Exposition** | | | | | | | | | | |
| S2 | | | | | | | | | o | | | | | | | | | | Plane | | | | | | | | | | |
| **Typical community parameter ranges** | | | | | | | | | | | | | | | | | | | | | | | | | | | | | |
| **Lower limit (fuzzy)** | | | | | | | **Lower limit of optimum** | | | | | | | | **Upper limit of optimum** | | | | | | | | **Upper limit (fuzzy)** | | | | | | |
| **Base saturation (according to Kappen-Adrian) [%]** | | | | | | | | | | | | | | | | | | | | | | | | | | | | | |
| 3 | | | | | | | 7 | | | | | | | | 23 | | | | | | | | 27 | | | | | | |
| **pHH2O [-]** | | | | | | | | | | | | | | | | | | | | | | | | | | | | | |
| 3 | | | | | | | 3.3 | | | | | | | | 4.6 | | | | | | | | 4.9 | | | | | | |
| **C/N ratio in humus and 10 cm mineral soil layer [%C/%N]** | | | | | | | | | | | | | | | | | | | | | | | | | | | | | |
| 18 | | | | | | | 21 | | | | | | | | 31 | | | | | | | | 33 | | | | | | |
| **Volumetric water content in the rooted soil layer [%]** | | | | | | | | | | | | | | | | | | | | | | | | | | | | | |
| 4 | | | | | | | 32 | | | | | | | | 58 | | | | | | | | 60 | | | | | | |
| **Growing season length [d>10°TMT/a]** | | | | | | | | | | | | | | | | | | | | | | | | | | | | | |
| 110 | | | | | | | 118 | | | | | | | | 148 | | | | | | | | 155 | | | | | | |
| **Climatic water balance per vegetation month [mm/Veg.-Mon.]** | | | | | | | | | | | | | | | | | | | | | | | | | | | | | |
| -22 | | | | | | | -12 | | | | | | | | 65 | | | | | | | | 70 | | | | | | |
| **Solar radiation (PAR) in the growing season [kWh m-2 a-1]** | | | | | | | | | | | | | **Lower limit (fuzzy)** | | | | | | | | | **Upper limit (fuzzy)** | | | | | | | |
| 310 | | | | | | | | | 520 | | | | | | | |
| **Lowest frost hardiness of all characteristic tree and shrub species (max. average annual low temperature) [°C]** | | | | | | | | | | | | | | | | | | | | | | | | | | | -26 | | |
| **Natural/near-natural combination of species** | | | | | | | | | | | | | | | | | | | | | | | | | | | | | |
| **Species** | | | | | | **Areal fraction [%]** | | | | | | **Species (english)** | | | | | | | | **Structural element** | | | | | | | | | |
| Quercus robur | | | | | | 5 | | | | | | Pedunculate oak | | | | | | | | Main tree species 2 | | | | | | | | | |
| Picea abies | | | | | | 2 | | | | | | Norway spruce | | | | | | | | Secondary tree species | | | | | | | | | |
| Pinus sylvestris | | | | | | 70 | | | | | | Scotch pine | | | | | | | | Main tree species 1 | | | | | | | | | |
| Betula pendula | | | | | | 10 | | | | | | Silver birch | | | | | | | | Secondary tree species | | | | | | | | | |
| Molinia caerulea | | | | | | 15 | | | | | | Purple moor grass | | | | | | | | Dominant herb species | | | | | | | | | |
| Ledum palustre | | | | | | 10 | | | | | | Crystal tea | | | | | | | | Upper tree/shrub layer | | | | | | | | | |
| Calluna vulgaris | | | | | | 10 | | | | | | Scotch heather | | | | | | | | Dominant herb species | | | | | | | | | |
| Vaccinium vitis-idaea | | | | | | 15 | | | | | | Cowberry | | | | | | | | Dominant herb species | | | | | | | | | |
| Vaccinium myrtillus | | | | | | 30 | | | | | | Blueberry | | | | | | | | Dominant herb species | | | | | | | | | |
| Sphagnum capillifolium | | | | | | 40 | | | | | | Grove peat moss | | | | | | | | Dominant moss species | | | | | | | | | |

# **Leucobryo-Pinetum sylvestris typicum MATUSZKIEWICZ 1962**

| **Synonym** | | | | **1.Sources of the community relevées** | | | | | | | | | | | | | | | | | | | | | | **No. of relevées** | | | |
| --- | --- | --- | --- | --- | --- | --- | --- | --- | --- | --- | --- | --- | --- | --- | --- | --- | --- | --- | --- | --- | --- | --- | --- | --- | --- | --- | --- | --- | --- |
| **2. EUNIS-Code, mapped EUNIS class** | | | | | | | | | | | | | | | | | | | | | |
| White moss-Pine forest (typ. subass.) | | | | 1. Matuszkiewicz (1962) Tab. 1/5+6 (also Hartmann et Jahn (1967) Tab. XIII/4-5, Schmidt (2002) 7.1.1, Tab. 2/6/1.1; Oberdorfer (1992) Vol IV, Tab. 261/1gB and Text Vol. p. 55; Runge (1994) p. 246; Berg et al 2001 Tab. 32.1.1.1 and Text p. 463; Heinken et Zippel 1999 Tab. 2/2; Matuszkiewicz J.M. 1993 p.44; Schubert 2001 p. 85) | | | | | | | | | | | | | | | | | | | | | | 1210 | | | |
| 2. T3J5, T35 -Temperate continental Pinus sylvestris forest | | | | | | | | | | | | | | | | | | | | | |
| **Possible climate classes** | | | | | | | | | | | | | | | | | | | | | | | | | | | | | |
| 06 | 07 | 14 | 15 | | 16 | | 17 | 23 | | 24 | 25 | | | 26 | 27 | 31 | 32 | 33 | | | 34 | | 35 | 36 | 37 | | | 41 | 42 |
| 43 | 44 | 45 | 46 | | 47 | | 51 | 52 | | 53 | 54 | | | 55 | 56 | 57 | 60 | 61 | | | 62 | | 63 | 64 | 65 | | | 66 | 67 |
| **Typical site forms according to Benning et al. (2015)** | | | | | | | | | | | | | | | | | | | | | | | | | | | | | |
| **Water budget levels** | | | | | | | | | **Trophy levels** | | | | | | | | | | **Relief/ Exposition** | | | | | | | | | | |
| T1, T2, T3, T4, T5 | | | | | | | | | o | | | | | | | | | | Plane, Shady slope, Sunny slope | | | | | | | | | | |
| **Typical community parameter ranges** | | | | | | | | | | | | | | | | | | | | | | | | | | | | | |
| **Lower limit (fuzzy)** | | | | | | | **Lower limit of optimum** | | | | | | | | **Upper limit of optimum** | | | | | | | | **Upper limit (fuzzy)** | | | | | | |
| **Base saturation (according to Kappen-Adrian) [%]** | | | | | | | | | | | | | | | | | | | | | | | | | | | | | |
| 4 | | | | | | | 8 | | | | | | | | 23 | | | | | | | | 27 | | | | | | |
| **pHH2O [-]** | | | | | | | | | | | | | | | | | | | | | | | | | | | | | |
| 3.1 | | | | | | | 3.4 | | | | | | | | 4.6 | | | | | | | | 4.9 | | | | | | |
| **C/N ratio in humus and 10 cm mineral soil layer [%C/%N]** | | | | | | | | | | | | | | | | | | | | | | | | | | | | | |
| 18 | | | | | | | 21 | | | | | | | | 31 | | | | | | | | 33 | | | | | | |
| **Volumetric water content in the rooted soil layer [%]** | | | | | | | | | | | | | | | | | | | | | | | | | | | | | |
| 4 | | | | | | | 7 | | | | | | | | 21 | | | | | | | | 24 | | | | | | |
| **Growing season length [d>10°TMT/a]** | | | | | | | | | | | | | | | | | | | | | | | | | | | | | |
| 120 | | | | | | | 126 | | | | | | | | 149 | | | | | | | | 155 | | | | | | |
| **Climatic water balance per vegetation month [mm/Veg.-Mon.]** | | | | | | | | | | | | | | | | | | | | | | | | | | | | | |
| -22 | | | | | | | -12 | | | | | | | | 65 | | | | | | | | 70 | | | | | | |
| **Solar radiation (PAR) in the growing season [kWh m-2 a-1]** | | | | | | | | | | | | | **Lower limit (fuzzy)** | | | | | | | | | **Upper limit (fuzzy)** | | | | | | | |
| 320 | | | | | | | | | 557 | | | | | | | |
| **Lowest frost hardiness of all characteristic tree and shrub species (max. average annual low temperature) [°C]** | | | | | | | | | | | | | | | | | | | | | | | | | | | -26 | | |
| **Natural/near-natural combination of species** | | | | | | | | | | | | | | | | | | | | | | | | | | | | | |
| **Species** | | | | | | **Areal fraction [%]** | | | | | | **Species (english)** | | | | | | | | **Structural element** | | | | | | | | | |
| Picea abies | | | | | | 2 | | | | | | Norway spruce | | | | | | | | Secondary tree species | | | | | | | | | |
| Pinus sylvestris | | | | | | 60 | | | | | | Scotch pine | | | | | | | | Main tree species 1 | | | | | | | | | |
| Quercus robur | | | | | | 5 | | | | | | Pedunculate oak | | | | | | | | Main tree species 2 | | | | | | | | | |
| Quercus petraea | | | | | | 5 | | | | | | Sessile oak | | | | | | | | Mixed tree species | | | | | | | | | |
| Betula pendula | | | | | | 5 | | | | | | Silver birch | | | | | | | | Mixed tree species | | | | | | | | | |
| Abies alba | | | | | | 5 | | | | | | Silver fir | | | | | | | | Mixed tree species | | | | | | | | | |
| Avenella flexuosa | | | | | | 20 | | | | | | Wavy hairgrass | | | | | | | | Dominant herb species | | | | | | | | | |
| Vaccinium myrtillus | | | | | | 20 | | | | | | Blueberry | | | | | | | | Dominant herb species | | | | | | | | | |
| Vaccinium vitis-idaea | | | | | | 10 | | | | | | Cowberry | | | | | | | | Dominant herb species | | | | | | | | | |
| Calluna vulgaris | | | | | | 10 | | | | | | Scotch heather | | | | | | | | Dominant herb species | | | | | | | | | |
| Dicranum scoparium | | | | | | 25 | | | | | | Common fork moss | | | | | | | | Dominant moss species | | | | | | | | | |
| Leucobryum glaucum | | | | | | 25 | | | | | | Common white moss | | | | | | | | Dominant moss species | | | | | | | | | |

# **Lonicero alpiginae-Abieti-Fagetum sylvatici allietosum OBERDORFER 1957**

| **Synonym** | | | | | **1.Sources of the community relevées** | | | | | | | | | | | | | | | | | | | | **No. of relevées** | | | | |
| --- | --- | --- | --- | --- | --- | --- | --- | --- | --- | --- | --- | --- | --- | --- | --- | --- | --- | --- | --- | --- | --- | --- | --- | --- | --- | --- | --- | --- | --- |
| **2. EUNIS-Code, mapped EUNIS class** | | | | | | | | | | | | | | | | | | | |
| Alpine honeysuckle - (Fir-)Beech forest (wild garlic subass.) | | | | | 1. Oberdorfer (1992) Vol IV, Tab. 337/3 and Text Vol. p. 225 | | | | | | | | | | | | | | | | | | | | 10 | | | | |
| 2. T1713, T17 - Fagus forest on non-acid soils | | | | | | | | | | | | | | | | | | | |
| **Possible climate classes** | | | | | | | | | | | | | | | | | | | | | | | | | | | | | |
| 06 | 07 | 14 | 15 | 16 | | | 17 | 23 | | 24 | 25 | | | 26 | 27 | 31 | 32 | 33 | | | 34 | | 35 | 36 | | 37 | | 41 | 42 |
| 43 | 44 | 45 | 46 | 47 | | | 51 | 52 | | 53 | 54 | | | 55 | 56 | 57 | 60 | 61 | | | 62 | | 63 | 64 | | 65 | | 66 | 67 |
| **Typical site forms according to Benning et al. (2015)** | | | | | | | | | | | | | | | | | | | | | | | | | | | | | |
| **Water budget levels** | | | | | | | | | **Trophy levels** | | | | | | | | | | | **Relief/ Exposition** | | | | | | | | | |
| S1 | | | | | | | | | e | | | | | | | | | | | Plane, Shady slope | | | | | | | | | |
| **Typical community parameter ranges** | | | | | | | | | | | | | | | | | | | | | | | | | | | | | |
| **Lower limit (fuzzy)** | | | | | | | **Lower limit of optimum** | | | | | | | | **Upper limit of optimum** | | | | | | | | **Upper limit (fuzzy)** | | | | | | |
| **Base saturation (according to Kappen-Adrian) [%]** | | | | | | | | | | | | | | | | | | | | | | | | | | | | | |
| 30 | | | | | | | 39 | | | | | | | | 76 | | | | | | | | 85 | | | | | | |
| **pHH2O [-]** | | | | | | | | | | | | | | | | | | | | | | | | | | | | | |
| 5.2 | | | | | | | 5.4 | | | | | | | | 6.0 | | | | | | | | 6.2 | | | | | | |
| **C/N ratio in humus and 10 cm mineral soil layer [%C/%N]** | | | | | | | | | | | | | | | | | | | | | | | | | | | | | |
| 15 | | | | | | | 17 | | | | | | | | 24 | | | | | | | | 26 | | | | | | |
| **Volumetric water content in the rooted soil layer [%]** | | | | | | | | | | | | | | | | | | | | | | | | | | | | | |
| 8 | | | | | | | 22 | | | | | | | | 26 | | | | | | | | 27 | | | | | | |
| **Growing season length [d>10°TMT/a]** | | | | | | | | | | | | | | | | | | | | | | | | | | | | | |
| 115 | | | | | | | 122 | | | | | | | | 148 | | | | | | | | 155 | | | | | | |
| **Climatic water balance per vegetation month [mm/Veg.-Mon.]** | | | | | | | | | | | | | | | | | | | | | | | | | | | | | |
| -12 | | | | | | | -12 | | | | | | | | 55 | | | | | | | | 59 | | | | | | |
| **Solar radiation (PAR) in the growing season [kWh m-2 a-1]** | | | | | | | | | | | | | **Lower limit (fuzzy)** | | | | | | | | | **Upper limit (fuzzy)** | | | | | | | |
| 443 | | | | | | | | | 538 | | | | | | | |
| **Lowest frost hardiness of all characteristic tree and shrub species (max. average annual low temperature) [°C]** | | | | | | | | | | | | | | | | | | | | | | | | | | | -24 | | |
| **Natural/near-natural combination of species** | | | | | | | | | | | | | | | | | | | | | | | | | | | | | |
| **Species** | | | | | | **Areal fraction [%]** | | | | | | **Species (english)** | | | | | | | **Structural element** | | | | | | | | | | |
| Fagus sylvatica | | | | | | 10 | | | | | | European beech | | | | | | | Mixed tree species | | | | | | | | | | |
| Picea abies | | | | | | 30 | | | | | | Norway spruce | | | | | | | Main tree species 2 | | | | | | | | | | |
| Abies alba | | | | | | 30 | | | | | | Silver fir | | | | | | | Main tree species 1 | | | | | | | | | | |
| Acer pseudoplatanus | | | | | | 5 | | | | | | Golden sycamore | | | | | | | Secondary tree species | | | | | | | | | | |
| Sorbus aucuparia | | | | | | 5 | | | | | | Mountain-ash | | | | | | | Intermediate tree layer | | | | | | | | | | |
| Hordelymus europaeus | | | | | | 10 | | | | | | Wood barley | | | | | | | Dominant herb species | | | | | | | | | | |
| Prenanthes purpurea | | | | | | 10 | | | | | | Purple lettuce | | | | | | | Dominant herb species | | | | | | | | | | |
| Dryopteris filix-mas | | | | | | 10 | | | | | | Male wood fern | | | | | | | Dominant herb species | | | | | | | | | | |
| Daphne mezereum | | | | | | 10 | | | | | | Mezereum | | | | | | | Upper tree/shrub layer | | | | | | | | | | |
| Sanicula europaea | | | | | | 10 | | | | | | Wood sanicle | | | | | | | Dominant herb species | | | | | | | | | | |
| Lonicera alpigena | | | | | | 10 | | | | | | Alpine honeysuckle | | | | | | | Upper tree/shrub layer | | | | | | | | | | |

# **Luzulo luzuloides-Abietetum athyrietosum OBERDORFER 1957**

| **Synonym** | | | | | **1.Sources of the community relevées** | | | | | | | | | | | | | | | | | | | **No. of relevées** | | | |
| --- | --- | --- | --- | --- | --- | --- | --- | --- | --- | --- | --- | --- | --- | --- | --- | --- | --- | --- | --- | --- | --- | --- | --- | --- | --- | --- | --- |
| **2. EUNIS-Code, mapped EUNIS class** | | | | | | | | | | | | | | | | | | |
| White woodrush-Fir forest (lady fern subass.) | | | | | Oberdorfer (1992) Vol IV, Table 267/8Bc and Text Vol. p. 66 | | | | | | | | | | | | | | | | | | | 16 | | | |
| 2. T32321, T32-Temperate mountain Abies forest | | | | | | | | | | | | | | | | | | |
| **Possible climate classes** | | | | | | | | | | | | | | | | | | | | | | | | | | | |
| 06 | 07 | 14 | 15 | 16 | | 17 | 23 | | 24 | 25 | | 26 | 27 | 31 | 32 | 33 | | | 34 | | 35 | 36 | 37 | | | 41 | 42 |
| 43 | 44 | 45 | 46 | 47 | | 51 | 52 | | 53 | 54 | | 55 | 56 | 57 | 60 | 61 | | | 62 | | 63 | 64 | 65 | | | 66 | 67 |
| **Typical site forms according to Benning et al. (2015)** | | | | | | | | | | | | | | | | | | | | | | | | | | | |
| **Water budget levels** | | | | | | | | **Trophy levels** | | | | | | | | | | **Relief/ Exposition** | | | | | | | | | |
| G1, G2 | | | | | | | | m | | | | | | | | | | Plane, Shady slope, Sunny slope | | | | | | | | | |
| **Typical community parameter ranges** | | | | | | | | | | | | | | | | | | | | | | | | | | | |
| **Lower limit (fuzzy)** | | | | | | **Lower limit of optimum** | | | | | | | **Upper limit of optimum** | | | | | | | | **Upper limit (fuzzy)** | | | | | | |
| **Base saturation (according to Kappen-Adrian) [%]** | | | | | | | | | | | | | | | | | | | | | | | | | | | |
| 13 | | | | | | 15 | | | | | | | 25 | | | | | | | | 25 | | | | | | |
| **pHH2O [-]** | | | | | | | | | | | | | | | | | | | | | | | | | | | |
| 3.8 | | | | | | 4.0 | | | | | | | 4.7 | | | | | | | | 4.7 | | | | | | |
| **C/N ratio in humus and 10 cm mineral soil layer [%C/%N]** | | | | | | | | | | | | | | | | | | | | | | | | | | | |
| 22 | | | | | | 24 | | | | | | | 29 | | | | | | | | 31 | | | | | | |
| **Volumetric water content in the rooted soil layer [%]** | | | | | | | | | | | | | | | | | | | | | | | | | | | |
| 6 | | | | | | 10 | | | | | | | 28 | | | | | | | | 28 | | | | | | |
| **Growing season length [d>10°TMT/a]** | | | | | | | | | | | | | | | | | | | | | | | | | | | |
| 95 | | | | | | 110 | | | | | | | 145 | | | | | | | | 155 | | | | | | |
| **Climatic water balance per vegetation month [mm/Veg.-Mon.]** | | | | | | | | | | | | | | | | | | | | | | | | | | | |
| -12 | | | | | | -12 | | | | | | | 70 | | | | | | | | 117 | | | | | | |
| **Solar radiation (PAR) in the growing season [kWh m-2 a-1]** | | | | | | | | | | | **Lower limit (fuzzy)** | | | | | | | | | **Upper limit (fuzzy)** | | | | | | | |
| 374 | | | | | | | | | 545 | | | | | | | |
| **Lowest frost hardiness of all characteristic tree and shrub species (max. average annual low temperature) [°C]** | | | | | | | | | | | | | | | | | | | | | | | | | -26 | | |
| **Natural/near-natural combination of species** | | | | | | | | | | | | | | | | | | | | | | | | | | | |
| **Species** | | | | | **Areal fraction [%]** | | | | | | **Species (english)** | | | | | | **Structural element** | | | | | | | | | | |
| Picea abies | | | | | 50 | | | | | | Norway spruce | | | | | | Main tree species 1 | | | | | | | | | | |
| Abies alba | | | | | 40 | | | | | | Silver fir | | | | | | Main tree species 2 | | | | | | | | | | |
| Sorbus aucuparia | | | | | 30 | | | | | | Mountain-ash | | | | | | Intermediate tree layer | | | | | | | | | | |
| Blechnum spicant | | | | | 10 | | | | | | Common ribbed fern | | | | | | Dominant herb species | | | | | | | | | | |
| Oxalis acetosella | | | | | 10 | | | | | | Wood sorrel | | | | | | Dominant herb species | | | | | | | | | | |
| Athyrium filix-femina | | | | | 10 | | | | | | Common lady-fern | | | | | | Dominant herb species | | | | | | | | | | |
| Dryopteris dilatata | | | | | 10 | | | | | | Broad wood fern | | | | | | Dominant herb species | | | | | | | | | | |
| Vaccinium myrtillus | | | | | 10 | | | | | | Blueberry | | | | | | Dominant herb species | | | | | | | | | | |
| Dicranum scoparium | | | | | 10 | | | | | | Common fork moss | | | | | | Dominant moss species | | | | | | | | | | |
| Hylocomium splendens | | | | | 10 | | | | | | Stack moss | | | | | | Dominant moss species | | | | | | | | | | |
| Rhytidiadelphus loreus | | | | | 10 | | | | | | Strap stem wreath moss | | | | | | Dominant moss species | | | | | | | | | | |
| Polytrichum formosum | | | | | 10 | | | | | | Beauty haircap moss | | | | | | Dominant moss species | | | | | | | | | | |

# **Luzulo luzuloides-Abietetum typicum OBERDORFER 1957**

| **Synonym** | | | | | **1.Sources of the community relevées** | | | | | | | | | | | | | | | | | | | | | **No. of relevées** | | | |
| --- | --- | --- | --- | --- | --- | --- | --- | --- | --- | --- | --- | --- | --- | --- | --- | --- | --- | --- | --- | --- | --- | --- | --- | --- | --- | --- | --- | --- | --- |
| **2. EUNIS-Code, mapped EUNIS class** | | | | | | | | | | | | | | | | | | | | |
| White woodrush-Fir forest (typ. subass.) | | | | | 1. Oberdorfer (1992) Vol IV, Table 267/8Bb and Text Vol. p. 66 (also: Chytry et al. 2013 tab. 6/13 p. 237+274) | | | | | | | | | | | | | | | | | | | | | 147 | | | |
| 2. T32321, T32 - Temperate mountain Abies forest | | | | | | | | | | | | | | | | | | | | |
| **Possible climate classes** | | | | | | | | | | | | | | | | | | | | | | | | | | | | | |
| 06 | 07 | 14 | 15 | 16 | | 17 | | 23 | | 24 | 25 | | 26 | | 27 | 31 | 32 | 33 | | | 34 | | 35 | 36 | 37 | | | 41 | 42 |
| 43 | 44 | 45 | 46 | 47 | | 51 | | 52 | | 53 | 54 | | 55 | | 56 | 57 | 60 | 61 | | | 62 | | 63 | 64 | 65 | | | 66 | 67 |
| **Typical site forms according to Benning et al. (2015)** | | | | | | | | | | | | | | | | | | | | | | | | | | | | | |
| **Water budget levels** | | | | | | | | | **Trophy levels** | | | | | | | | | | **Relief/ Exposition** | | | | | | | | | | |
| T1, T2, T3, T4, T5 | | | | | | | | | m | | | | | | | | | | Plane, Shady slope, Sunny slope | | | | | | | | | | |
| **Typical community parameter ranges** | | | | | | | | | | | | | | | | | | | | | | | | | | | | | |
| **Lower limit (fuzzy)** | | | | | | **Lower limit of optimum** | | | | | | | | | **Obere Grenze des Optimums** | | | | | | | | **Upper limit (fuzzy)** | | | | | | |
| **Base saturation (according to Kappen-Adrian) [%]** | | | | | | | | | | | | | | | | | | | | | | | | | | | | | |
| 13 | | | | | | 15 | | | | | | | | | 25 | | | | | | | | 25 | | | | | | |
| **pHH2O [-]** | | | | | | | | | | | | | | | | | | | | | | | | | | | | | |
| 3.8 | | | | | | 4.0 | | | | | | | | | 4.7 | | | | | | | | 4.7 | | | | | | |
| **C/N ratio in humus and 10 cm mineral soil layer [%C/%N]** | | | | | | | | | | | | | | | | | | | | | | | | | | | | | |
| 22 | | | | | | 24 | | | | | | | | | 29 | | | | | | | | 31 | | | | | | |
| **Volumetric water content in the rooted soil layer [%]** | | | | | | | | | | | | | | | | | | | | | | | | | | | | | |
| 6 | | | | | | 10 | | | | | | | | | 28 | | | | | | | | 28 | | | | | | |
| **Growing season length [d>10°TMT/a]** | | | | | | | | | | | | | | | | | | | | | | | | | | | | | |
| 95 | | | | | | 110 | | | | | | | | | 145 | | | | | | | | 155 | | | | | | |
| **Climatic water balance per vegetation month [mm/Veg.-Mon.]** | | | | | | | | | | | | | | | | | | | | | | | | | | | | | |
| -12 | | | | | | -12 | | | | | | | | | 70 | | | | | | | | 117 | | | | | | |
| **Solar radiation (PAR) in the growing season [kWh m-2 a-1]** | | | | | | | | | | | | **Lower limit (fuzzy)** | | | | | | | | | | **Upper limit (fuzzy)** | | | | | | | |
| 379 | | | | | | | | | | 603 | | | | | | | |
| **Lowest frost hardiness of all characteristic tree and shrub species (max. average annual low temperature) [°C]** | | | | | | | | | | | | | | | | | | | | | | | | | | | -26 | | |
| **Natural/near-natural combination of species** | | | | | | | | | | | | | | | | | | | | | | | | | | | | | |
| **Species** | | | | | | | **Areal fraction [%]** | | | | | | | **Species (english)** | | | | | | **Structural element** | | | | | | | | | |
| Fagus sylvatica | | | | | | | 10 | | | | | | | European beech | | | | | | Mixed tree species | | | | | | | | | |
| Abies alba | | | | | | | 20 | | | | | | | Silver fir | | | | | | Main tree species 2 | | | | | | | | | |
| Picea abies | | | | | | | 30 | | | | | | | Norway spruce | | | | | | Main tree species 1 | | | | | | | | | |
| Sorbus aucuparia | | | | | | | 5 | | | | | | | Mountain-ash | | | | | | Intermediate tree layer | | | | | | | | | |
| Acer pseudoplatanus | | | | | | | 2 | | | | | | | Golden sycamore | | | | | | Secondary tree species | | | | | | | | | |
| Luzula sylvatica | | | | | | | 10 | | | | | | | Great woodrush | | | | | | Dominant herb species | | | | | | | | | |
| Avenella flexuosa | | | | | | | 15 | | | | | | | Wavy hairgrass | | | | | | Dominant herb species | | | | | | | | | |
| Blechnum spicant | | | | | | | 15 | | | | | | | Common ribbed fern | | | | | | Dominant herb species | | | | | | | | | |
| Vaccinium myrtillus | | | | | | | 15 | | | | | | | Blueberry | | | | | | Dominant herb species | | | | | | | | | |
| Prenanthes purpurea | | | | | | | 15 | | | | | | | Purple lettuce | | | | | | Dominant herb species | | | | | | | | | |
| Polytrichum formosum | | | | | | | 40 | | | | | | | Beauty haircap moss | | | | | | Dominant moss species | | | | | | | | | |

# **Luzulo luzuloides-Fagetum sylvatici athyrietosum MEUSEL 1937**

| **Synonym** | | | | **1.Sources of the community relevées** | | | | | | | | | | | | | | | | | | | | | | **No. of relevées** | | | |
| --- | --- | --- | --- | --- | --- | --- | --- | --- | --- | --- | --- | --- | --- | --- | --- | --- | --- | --- | --- | --- | --- | --- | --- | --- | --- | --- | --- | --- | --- |
| **2. EUNIS-Code, mapped EUNIS class** | | | | | | | | | | | | | | | | | | | | | |
| White woodrush- Beech forest (lady fern subass.) | | | | 1. Oberdorfer (1992) Vol IV, Tab. 325/6 and Text Vol. IV p. 202 (also Hartmann et Jahn 1967 Tab. Via/26, 34-38, Tab. 15/1-14 et p. 435) | | | | | | | | | | | | | | | | | | | | | | 18 | | | |
| 2. T181 - Medio-European acidophilous Fagus forests | | | | | | | | | | | | | | | | | | | | | |
| **Possible climate classes** | | | | | | | | | | | | | | | | | | | | | | | | | | | | | |
| 06 | 07 | 14 | 15 | | 16 | | 17 | 23 | | 24 | 25 | | | 26 | 27 | 31 | 32 | 33 | | | 34 | | 35 | 36 | 37 | | | 41 | 42 |
| 43 | 44 | 45 | 46 | | 47 | | 51 | 52 | | 53 | 54 | | | 55 | 56 | 57 | 60 | 61 | | | 62 | | 63 | 64 | 65 | | | 66 | 67 |
| **Typical site forms according to Benning et al. (2015)** | | | | | | | | | | | | | | | | | | | | | | | | | | | | | |
| **Water budget levels** | | | | | | | | | **Trophy levels** | | | | | | | | | | **Relief/ Exposition** | | | | | | | | | | |
| T1, T2, T3, T4, T5, S2 | | | | | | | | | om, m | | | | | | | | | | Plane, Shady slope | | | | | | | | | | |
| **Typical community parameter ranges** | | | | | | | | | | | | | | | | | | | | | | | | | | | | | |
| **Lower limit (fuzzy)** | | | | | | | **Lower limit of optimum** | | | | | | | | **Upper limit of optimum** | | | | | | | | **Upper limit (fuzzy)** | | | | | | |
| **Base saturation (according to Kappen-Adrian) [%]** | | | | | | | | | | | | | | | | | | | | | | | | | | | | | |
| 16 | | | | | | | 18 | | | | | | | | 25 | | | | | | | | 27 | | | | | | |
| **pHH2O [-]** | | | | | | | | | | | | | | | | | | | | | | | | | | | | | |
| 4 | | | | | | | 4.2 | | | | | | | | 4.8 | | | | | | | | 4.9 | | | | | | |
| **C/N ratio in humus and 10 cm mineral soil layer [%C/%N]** | | | | | | | | | | | | | | | | | | | | | | | | | | | | | |
| 18 | | | | | | | 20 | | | | | | | | 29 | | | | | | | | 31 | | | | | | |
| **Volumetric water content in the rooted soil layer [%]** | | | | | | | | | | | | | | | | | | | | | | | | | | | | | |
| 7 | | | | | | | 13 | | | | | | | | 36 | | | | | | | | 42 | | | | | | |
| **Growing season length [d>10°TMT/a]** | | | | | | | | | | | | | | | | | | | | | | | | | | | | | |
| 110 | | | | | | | 119 | | | | | | | | 156 | | | | | | | | 165 | | | | | | |
| **Climatic water balance per vegetation month [mm/Veg.-Mon.]** | | | | | | | | | | | | | | | | | | | | | | | | | | | | | |
| -22 | | | | | | | -12 | | | | | | | | 65 | | | | | | | | 70 | | | | | | |
| **Solar radiation (PAR) in the growing season [kWh m-2 a-1]** | | | | | | | | | | | | | **Lower limit (fuzzy)** | | | | | | | | | **Upper limit (fuzzy)** | | | | | | | |
| 370 | | | | | | | | | 542 | | | | | | | |
| **Lowest frost hardiness of all characteristic tree and shrub species (max. average annual low temperature) [°C]** | | | | | | | | | | | | | | | | | | | | | | | | | | | -24 | | |
| **Natural/near-natural combination of species** | | | | | | | | | | | | | | | | | | | | | | | | | | | | | |
| **Species** | | | | | | **Areal fraction [%]** | | | | | | **Species (english)** | | | | | | | | **Structural element** | | | | | | | | | |
| Quercus petraea | | | | | | 20 | | | | | | Sessile oak | | | | | | | | Main tree species 2 | | | | | | | | | |
| Fagus sylvatica | | | | | | 70 | | | | | | European beech | | | | | | | | Main tree species 1 | | | | | | | | | |
| Avenella flexuosa | | | | | | 10 | | | | | | Wavy hairgrass | | | | | | | | Dominant herb species | | | | | | | | | |
| Luzula luzuloides | | | | | | 20 | | | | | | Snow-white woodrush | | | | | | | | Dominant herb species | | | | | | | | | |
| Athyrium filix-femina | | | | | | 15 | | | | | | Common lady-fern | | | | | | | | Dominant herb species | | | | | | | | | |
| Dryopteris carthusiana | | | | | | 20 | | | | | | Common buckler fern | | | | | | | | Dominant herb species | | | | | | | | | |
| Polytrichum formosum | | | | | | 30 | | | | | | Beauty haircap moss | | | | | | | | Dominant moss species | | | | | | | | | |

# **Luzulo luzuloides-Fagetum sylvatici caricetosum brizoides MEUSEL 1937**

| **Synonym** | | | | | | | **1.Sources of the community relevées** | | | | | | | | | | | | | | | | | | | **No. of relevées** | | | |
| --- | --- | --- | --- | --- | --- | --- | --- | --- | --- | --- | --- | --- | --- | --- | --- | --- | --- | --- | --- | --- | --- | --- | --- | --- | --- | --- | --- | --- | --- |
| **2. EUNIS-Code, mapped EUNIS class** | | | | | | | | | | | | | | | | | | |
| White woodrush- Beech forest (quaking-grass sedge subass.) | | | | | | | 1. Oberdorfer (1992) Vol IV, Tab. 325/5 and Text Vol. IV p. 202 | | | | | | | | | | | | | | | | | | | 14 | | | |
| 2. T181 - Medio-European acidophilous Fagus forests | | | | | | | | | | | | | | | | | | |
| **Possible climate classes** | | | | | | | | | | | | | | | | | | | | | | | | | | | | | |
| 06 | 07 | 14 | 15 | 16 | | 17 | | 23 | | 24 | 25 | | | 26 | 27 | 31 | 32 | 33 | | | 34 | | 35 | 36 | 37 | | | 41 | 42 |
| 43 | 44 | 45 | 46 | 47 | | 51 | | 52 | | 53 | 54 | | | 55 | 56 | 57 | 60 | 61 | | | 62 | | 63 | 64 | 65 | | | 66 | 67 |
| **Typical site forms according to Benning et al. (2015)** | | | | | | | | | | | | | | | | | | | | | | | | | | | | | |
| **Water budget levels** | | | | | | | | | **Trophy levels** | | | | | | | | | | **Relief/ Exposition** | | | | | | | | | | |
| G2, S2, S3 | | | | | | | | | m | | | | | | | | | | Plane, Shady slope | | | | | | | | | | |
| **Typical community parameter ranges** | | | | | | | | | | | | | | | | | | | | | | | | | | | | | |
| **Lower limit (fuzzy)** | | | | | | **Lower limit of optimum** | | | | | | | | | **Upper limit of optimum** | | | | | | | | **Upper limit (fuzzy)** | | | | | | |
| **Base saturation (according to Kappen-Adrian) [%]** | | | | | | | | | | | | | | | | | | | | | | | | | | | | | |
| 16 | | | | | | 18 | | | | | | | | | 25 | | | | | | | | 27 | | | | | | |
| **pHH2O [-]** | | | | | | | | | | | | | | | | | | | | | | | | | | | | | |
| 4 | | | | | | 4.2 | | | | | | | | | 4.8 | | | | | | | | 4.9 | | | | | | |
| **C/N ratio in humus and 10 cm mineral soil layer [%C/%N]** | | | | | | | | | | | | | | | | | | | | | | | | | | | | | |
| 18 | | | | | | 20 | | | | | | | | | 29 | | | | | | | | 31 | | | | | | |
| **Volumetric water content in the rooted soil layer [%]** | | | | | | | | | | | | | | | | | | | | | | | | | | | | | |
| 31 | | | | | | 33 | | | | | | | | | 40 | | | | | | | | 42 | | | | | | |
| **Growing season length [d>10°TMT/a]** | | | | | | | | | | | | | | | | | | | | | | | | | | | | | |
| 110 | | | | | | 119 | | | | | | | | | 156 | | | | | | | | 165 | | | | | | |
| **Climatic water balance per vegetation month [mm/Veg.-Mon.]** | | | | | | | | | | | | | | | | | | | | | | | | | | | | | |
| -22 | | | | | | -12 | | | | | | | | | 65 | | | | | | | | 70 | | | | | | |
| **Solar radiation (PAR) in the growing season [kWh m-2 a-1]** | | | | | | | | | | | | | **Lower limit (fuzzy)** | | | | | | | | | **Upper limit (fuzzy)** | | | | | | | |
| 369 | | | | | | | | | 604 | | | | | | | |
| **Lowest frost hardiness of all characteristic tree and shrub species (max. average annual low temperature) [°C]** | | | | | | | | | | | | | | | | | | | | | | | | | | | -24 | | |
| **Natural/near-natural combination of species** | | | | | | | | | | | | | | | | | | | | | | | | | | | | | |
| **Species** | | | | | **Areal fraction [%]** | | | | | | | **Species (english)** | | | | | | | | **Structural element** | | | | | | | | | |
| Quercus petraea | | | | | 5 | | | | | | | Sessile oak | | | | | | | | Main tree species 2 | | | | | | | | | |
| Quercus robur | | | | | 5 | | | | | | | Pedunculate oak | | | | | | | | Mixed tree species | | | | | | | | | |
| Fagus sylvatica | | | | | 80 | | | | | | | European beech | | | | | | | | Main tree species 1 | | | | | | | | | |
| Carex brizoides | | | | | 40 | | | | | | | Quaking-grass sedge | | | | | | | | Dominant herb species | | | | | | | | | |
| Milium effusum | | | | | 20 | | | | | | | Wood millet | | | | | | | | Dominant herb species | | | | | | | | | |
| Deschampsia cespitosa | | | | | 20 | | | | | | | Tussock hairgrass | | | | | | | | Dominant herb species | | | | | | | | | |
| Polytrichum formosum | | | | | 35 | | | | | | | Beauty haircap moss | | | | | | | | Dominant moss species | | | | | | | | | |

# **Luzulo luzuloides-Fagetum sylvatici convallarietosum MEUSEL 1937**

| **Synonym** | | | | | | | | | | **1.Sources of the community relevées** | | | | | | | | | | | | | | | **No. of relevées** | | | |
| --- | --- | --- | --- | --- | --- | --- | --- | --- | --- | --- | --- | --- | --- | --- | --- | --- | --- | --- | --- | --- | --- | --- | --- | --- | --- | --- | --- | --- |
| **2. EUNIS-Code, mapped EUNIS class** | | | | | | | | | | | | | | |
| White woodrush- Beech forest (Lily of the valley-subass.)  Carici umbrosae-Fagetum OBERDORFER 1957 | | | | | | | | | | 1. Oberdorfer (1992) Vol IV, Tab. 324/1b and Text Vol. IV p. 202 | | | | | | | | | | | | | | | 278 | | | |
| 2. T181-Medio-European acidophilous Fagus forests | | | | | | | | | | | | | | |
| **Possible climate classes** | | | | | | | | | | | | | | | | | | | | | | | | | | | | |
| 06 | 07 | 14 | 15 | 16 | | 17 | 23 | | 24 | 25 | | | 26 | 27 | 31 | 32 | 33 | | | 34 | | 35 | 36 | 37 | | | 41 | 42 |
| 43 | 44 | 45 | 46 | 47 | | 51 | 52 | | 53 | 54 | | | 55 | 56 | 57 | 60 | 61 | | | 62 | | 63 | 64 | 65 | | | 66 | 67 |
| **Typical site forms according to Benning et al. (2015)** | | | | | | | | | | | | | | | | | | | | | | | | | | | | |
| **Water budget levels** | | | | | | | | **Trophy levels** | | | | | | | | | | **Relief/ Exposition** | | | | | | | | | | |
| T1, T2, T3, T4, T5 | | | | | | | | o, om | | | | | | | | | | Sunny slope | | | | | | | | | | |
| **Typical community parameter ranges** | | | | | | | | | | | | | | | | | | | | | | | | | | | | |
| **Lower limit (fuzzy)** | | | | | | **Lower limit of optimum** | | | | | | | | **Upper limit of optimum** | | | | | | | | **Upper limit (fuzzy)** | | | | | | |
| **Base saturation (according to Kappen-Adrian) [%]** | | | | | | | | | | | | | | | | | | | | | | | | | | | | |
| 13 | | | | | | 15 | | | | | | | | 25 | | | | | | | | 27 | | | | | | |
| **pHH2O [-]** | | | | | | | | | | | | | | | | | | | | | | | | | | | | |
| 3.8 | | | | | | 4.0 | | | | | | | | 4.7 | | | | | | | | 4.9 | | | | | | |
| **C/N ratio in humus and 10 cm mineral soil layer [%C/%N]** | | | | | | | | | | | | | | | | | | | | | | | | | | | | |
| 18 | | | | | | 20 | | | | | | | | 29 | | | | | | | | 31 | | | | | | |
| **Volumetric water content in the rooted soil layer [%]** | | | | | | | | | | | | | | | | | | | | | | | | | | | | |
| 7 | | | | | | 10 | | | | | | | | 21 | | | | | | | | 24 | | | | | | |
| **Growing season length [d>10°TMT/a]** | | | | | | | | | | | | | | | | | | | | | | | | | | | | |
| 115 | | | | | | 123 | | | | | | | | 157 | | | | | | | | 165 | | | | | | |
| **Climatic water balance per vegetation month [mm/Veg.-Mon.]** | | | | | | | | | | | | | | | | | | | | | | | | | | | | |
| -22 | | | | | | -12 | | | | | | | | 65 | | | | | | | | 70 | | | | | | |
| **Solar radiation (PAR) in the growing season [kWh m-2 a-1]** | | | | | | | | | | | | **Lower limit (fuzzy)** | | | | | | | | | **Upper limit (fuzzy)** | | | | | | | |
| 411 | | | | | | | | | 617 | | | | | | | |
| **Lowest frost hardiness of all characteristic tree and shrub species (max. average annual low temperature) [°C]** | | | | | | | | | | | | | | | | | | | | | | | | | | -24 | | |
| **Natural/near-natural combination of species** | | | | | | | | | | | | | | | | | | | | | | | | | | | | |
| **Species** | | | | | **Areal fraction [%]** | | | | | | **Species (english)** | | | | | | | | **Structural element** | | | | | | | | | |
| Fagus sylvatica | | | | | 65 | | | | | | European beech | | | | | | | | Main tree species 1 | | | | | | | | | |
| Quercus petraea | | | | | 25 | | | | | | Sessile oak | | | | | | | | Main tree species 2 | | | | | | | | | |
| Avenella flexuosa | | | | | 20 | | | | | | Wavy hairgrass | | | | | | | | Dominant herb species | | | | | | | | | |
| Luzula luzuloides | | | | | 30 | | | | | | Snow-white woodrush | | | | | | | | Dominant herb species | | | | | | | | | |
| Convallaria majalis | | | | | 20 | | | | | | Lily of the valley | | | | | | | | Dominant herb species | | | | | | | | | |
| Polytrichum formosum | | | | | 40 | | | | | | Beauty haircap moss | | | | | | | | Dominant moss species | | | | | | | | | |

# **Luzulo luzuloides-Fagetum sylvatici typicum MEUSEL 1937**

| **Synonym** | | | | | | | | | | **1.Sources of the community relevées** | | | | | | | | | | | | | | | | **No. of relevées** | | | |
| --- | --- | --- | --- | --- | --- | --- | --- | --- | --- | --- | --- | --- | --- | --- | --- | --- | --- | --- | --- | --- | --- | --- | --- | --- | --- | --- | --- | --- | --- |
| **2. EUNIS-Code, mapped EUNIS class** | | | | | | | | | | | | | | | |
| White woodrush- Beech forest (typ. subass.)  Luzulo pilosae-Fagetum sylvatici W. Mat. et A. Mat. 1973; Milio-Fagetum sylvaticae BUR-RICHTER, 1973 in ELLENBERG 1986; Luzulo albidae-Fagetum sylvatici Meusel 1937; Melampyro-Fagetum typicum OBERDORFER 1957 | | | | | | | | | | 1. Oberdorfer (1992) Vol IV, Table 325/3 and Text Vol. p. 202 (also Tüxen (1937) p. 144; Hartmann et Jahn 1967 Table Via/ 39-42, Table15/31-50, 60, 61 et p. 436; Dzwonko et al. 1999 Tab. 1/10; Chytry et al. 2013 tab. 6/11 p. 237+268; Niemeyer et al. 2010 p. 83; Schubert 2001 p. 61) | | | | | | | | | | | | | | | | 1561 | | | |
| 2. T181 - Medio-European acidophilous Fagus forests | | | | | | | | | | | | | | | |
| **Possible climate classes** | | | | | | | | | | | | | | | | | | | | | | | | | | | | | |
| 06 | 07 | 14 | 15 | 16 | | 17 | 23 | | 24 | | 25 | | | 26 | 27 | 31 | 32 | 33 | | 34 | | | 35 | 36 | 37 | | | 41 | 42 |
| 43 | 44 | 45 | 46 | 47 | | 51 | 52 | | 53 | | 54 | | | 55 | 56 | 57 | 60 | 61 | | 62 | | | 63 | 64 | 65 | | | 66 | 67 |
| **Typical site forms according to Benning et al. (2015)** | | | | | | | | | | | | | | | | | | | | | | | | | | | | | |
| **Water budget levels** | | | | | | | | **Trophy levels** | | | | | | | | | | | **Relief/ Exposition** | | | | | | | | | | |
| T1, T2, T3, T4, T5 | | | | | | | | om, m | | | | | | | | | | | Plane, Shady slope | | | | | | | | | | |
| **Typical community parameter ranges** | | | | | | | | | | | | | | | | | | | | | | | | | | | | | |
| **Lower limit (fuzzy)** | | | | | | **Lower limit of optimum** | | | | | | | | | **Upper limit of optimum** | | | | | | | | **Upper limit (fuzzy)** | | | | | | |
| **Base saturation (according to Kappen-Adrian) [%]** | | | | | | | | | | | | | | | | | | | | | | | | | | | | | |
| 13 | | | | | | 15 | | | | | | | | | 25 | | | | | | | | 27 | | | | | | |
| **pHH2O [-]** | | | | | | | | | | | | | | | | | | | | | | | | | | | | | |
| 3.8 | | | | | | 4.0 | | | | | | | | | 4.7 | | | | | | | | 4.9 | | | | | | |
| **C/N ratio in humus and 10 cm mineral soil layer [%C/%N]** | | | | | | | | | | | | | | | | | | | | | | | | | | | | | |
| 18 | | | | | | 20 | | | | | | | | | 29 | | | | | | | | 31 | | | | | | |
[truncated: 284,897 more chars]
